# Supplementary material for: Quantitative proteomics reveal proteins enriched in tubular endoplasmic reticulum of Saccharomyces cerevisiae
Source: eLife. 2017 Mar 13;6:e23816. doi: 10.7554/eLife.23816 (PMC5358975; doi:10.7554/eLife.23816)
Supplement: Figure 3—source data 1. — DOI: http://dx.doi.org/10.7554/eLife.23816.007 [file elife-23816-fig3-data1.xlsx]

## Sheet: 1_proteins
Table S1-1. Protein identification results for 845 proteins with TU:TO ratios
NOTES:
1) Unused score and total score indicate confidencde of protein identification by ProteinPilot.
2) %Cov, %Cov(50), %Cov(95) refer to the protein sequence coverage based on all identified peptides, or peptides above 50% or 95% confidence.
3) Peptides(95%) refers to the number of peptides identified above 95% confidence.
Uniprot Accession	Protein description	Unused score	Total score	%Cov	%Cov(50)	%Cov(95)	Peptides(95%)
Q01590	Integral membrane protein SED5	4.04	4.04	21.76	8.529	8.529	2
P25367	[PIN+] prion protein RNQ1	8	8	22.96	17.04	17.04	7
P00445	Superoxide dismutase [Cu-Zn]	8.13	8.13	50.65	50.65	44.81	4
P38737	Proteasome component ECM29	3.33	3.34	8.619	2.73	2.034	4
P07991	Ornithine aminotransferase	4.88	4.88	29.95	15.09	12.26	3
Q03860	Golgi apparatus membrane protein TVP15	2	2	13.99	13.99	13.99	1
P05749	60S ribosomal protein L22-A	5.89	5.89	59.5	55.37	55.37	4
Q99385	Vacuolar calcium ion transporter	4.01	4.01	14.6	6.813	6.813	6
P53093	Protein YIP4	2.62	2.62	23.83	8.511	8.511	2
P09620	Pheromone-processing carboxypeptidase KEX1	3.78	3.78	9.328	6.036	4.938	3
P09064	Eukaryotic translation initiation factor 2 subunit beta	5.11	5.11	22.11	14.04	9.825	3
P53163	54S ribosomal protein L12, mitochondrial	4.04	4.04	19.59	16.49	16.49	2
P00359	Glyceraldehyde-3-phosphate dehydrogenase 3	36.2	55.32	74.4	74.4	74.4	56
P34167	Eukaryotic translation initiation factor 4B	12.63	12.63	48.85	25.46	19.5	7
Q06287	Ribosomal RNA small subunit methyltransferase NEP1	2.69	2.69	20.63	11.11	11.11	2
P40364	Mitochondrial peculiar membrane protein 1	6.01	6.01	37.3	23.81	18.65	3
P22141	Proteasome subunit beta type-4	2.47	2.47	24.24	20.2	14.65	2
P00924	Enolase 1	53.24	53.24	72.08	67.96	65.9	41
P00360	Glyceraldehyde-3-phosphate dehydrogenase 1	45.36	45.36	69.28	68.67	68.37	60
P38116	ADP-ribosylation factor-like protein 1	3.25	3.25	18.03	18.03	10.38	2
P00560	Phosphoglycerate kinase	61.57	61.57	81.97	78.13	75.96	54
P47124	Putative glycosyltransferase HOC1	4	4	10.61	4.798	4.798	3
P40169	Uncharacterized plasma membrane protein YNL194C	2.58	2.58	18.94	8.306	8.306	2
Q99321	Diphosphoinositol polyphosphate phosphohydrolase DDP1	2	2	8.511	8.511	8.511	1
P43588	26S proteasome regulatory subunit RPN11	4	4	23.53	8.824	8.824	2
Q3E764	Translation machinery-associated protein 7	2	2	20.31	20.31	20.31	2
P23301	Eukaryotic translation initiation factor 5A-1	11.76	11.76	64.97	48.41	48.41	9
P00942	Triosephosphate isomerase	16.23	16.23	61.29	50	44.35	13
Q12512	Protein ZPS1	9.59	9.59	34.14	30.52	26.51	5
P38248	Cell wall protein ECM33	3.07	3.07	9.79	7.459	5.828	2
P48836	V-type proton ATPase subunit G	11.26	11.26	66.67	43.86	41.23	7
Q3E792	40S ribosomal protein S25-A	8.22	8.22	50	35.19	29.63	6
P31109	Synaptobrevin homolog 1	3.01	3.01	29.91	23.93	23.93	2
P06115	Catalase T	4.59	4.59	15.3	7.829	5.338	2
P38013	Peroxiredoxin type-2	8.76	8.76	58.52	40.91	40.91	10
P00950	Phosphoglycerate mutase 1	27.11	27.11	74.49	68.42	65.59	17
Q12335	Protoplast secreted protein 2	17.21	17.21	81.82	79.29	79.29	10
Q12285	Ubiquitin-like protein MDY2	16.14	16.14	65.09	62.26	57.08	9
Q02642	Nascent polypeptide-associated complex subunit beta-1	6.35	6.35	46.5	29.3	24.84	3
P53630	Dethiobiotin synthetase	10.21	10.21	50.63	50.63	35.44	8
P48589	40S ribosomal protein S12	10	10	41.26	39.16	39.16	5
Q03973	High mobility group protein 1	10.04	10.04	48.37	41.87	30.89	5
P23724	Proteasome subunit beta type-6	2.83	2.83	31.54	18.26	12.45	2
Q08193	1,3-beta-glucanosyltransferase GAS5	9	9	21.49	15.91	12.81	5
P04912	Histone H2A.2	6.25	6.25	34.85	34.85	29.55	4
P53184	Nicotinamidase	12.55	12.55	54.17	48.15	45.37	8
P53131	Pre-mRNA-splicing factor ATP-dependent RNA helicase PRP43	8.02	8.02	22.03	11.6	11.6	4
P22803	Thioredoxin-2	12	12	66.35	66.35	66.35	6
P22943	12 kDa heat shock protein	10.01	10.01	59.63	50.46	50.46	7
P43593	Ubiquitin carboxyl-terminal hydrolase 6	8.88	8.88	17.84	13.63	13.63	5
P19882	Heat shock protein 60, mitochondrial	21.27	21.27	25.17	23.6	23.6	11
P05739	60S ribosomal protein L6-B	4.3	20.35	68.18	59.09	55.11	12
P36060	NADH-cytochrome b5 reductase 2	18.3	18.3	60.6	51.66	46.36	10
P38298	Alkaline ceramidase YPC1	2	2	5.696	5.696	5.696	2
Q04935	Cytochrome c oxidase protein 20, mitochondrial	5.79	5.79	26.83	23.41	23.41	5
P53252	Sphingolipid long chain base-responsive protein PIL1	38.13	38.13	68.73	67.55	65.49	38
P87262	60S ribosomal protein L34-A	6	6	27.27	20.66	20.66	3
P14540	Fructose-bisphosphate aldolase	33.36	33.36	68.8	67.13	63.51	28
P05030	Plasma membrane ATPase 1	68.4	68.4	41.72	41.72	41.72	54
P05759	Ubiquitin-40S ribosomal protein S31	11.6	11.6	38.82	38.82	30.92	8
P02994	Elongation factor 1-alpha	63.76	63.76	66.16	60.04	54.37	65
P06169	Pyruvate decarboxylase isozyme 1	74.83	74.83	67.5	60.75	53.64	67
P89886	Translation machinery-associated protein 20	5.32	5.32	34.81	26.52	21.55	3
P32598	Serine/threonine-protein phosphatase PP1-2	8.21	8.21	30.45	26.6	24.04	5
P32588	Nuclear and cytoplasmic polyadenylated RNA-binding protein PUB1	5.92	5.92	8.389	5.519	5.519	3
P05319	60S acidic ribosomal protein P2-alpha	9.94	9.94	52.83	52.83	52.83	9
A5Z2X5	UPF0495 protein YPR010C-A	4	4	26.39	26.39	26.39	2
P37267	Assembly factor CBP4	6.06	6.06	49.66	26.53	26.53	3
P00549	Pyruvate kinase 1	62.71	62.71	79	68.2	62.8	50
P00817	Inorganic pyrophosphatase	10.58	10.58	44.95	34.15	29.97	7
P38142	Probable metabolite transport protein YBR241C	5.82	5.82	7.992	7.992	7.992	4
P07149	Fatty acid synthase subunit beta	160.88	160.88	61.92	52.51	48.76	105
P04840	Mitochondrial outer membrane protein porin 1	58.24	58.24	87.28	87.28	84.1	88
P38426	Trehalose synthase complex regulatory subunit TPS3	6.85	6.92	14.33	4.08	4.08	4
Q12270	Rhomboid protein 2	2.62	2.62	19.08	9.16	6.489	2
P32804	Zinc-regulated transporter 1	10	10	17.29	17.29	14.89	8
P32471	Elongation factor 1-beta	12.96	12.96	61.17	47.57	40.29	12
Q06485	Autophagy-related protein 33	8	8	19.29	19.29	19.29	4
P69771	Vacuolar protein-sorting-associated protein 46	3.19	3.19	23.04	17.16	11.76	2
P32324	Elongation factor 2	74.67	74.67	65.44	57.36	55.34	47
P12709	Glucose-6-phosphate isomerase	28.66	28.66	44.4	39.53	36.64	15
P33328	Synaptobrevin homolog 2	4	4	20	20	20	4
P32911	Eukaryotic translation initiation factor eIF-1	8.66	8.66	70.37	70.37	70.37	6
Q3E824	Uncharacterized protein YOR020W-A	2.02	2.02	35.56	20	20	1
P38788	Ribosome-associated complex subunit SSZ1	34.4	34.4	58.74	55.95	52.23	23
P53278	Uncharacterized protein YGR130C	17.94	17.94	29.9	15.56	13.97	10
Q12207	Non-classical export protein 2	13.37	13.37	20.23	20.23	20.23	16
P19097	Fatty acid synthase subunit alpha	174.87	174.87	68.68	61.74	58.35	122
P46992	Cell wall protein YJL171C	8.04	8.04	14.9	13.38	13.38	4
Q12513	Translation machinery-associated protein 17	12	12	50	47.33	47.33	12
P41056	60S ribosomal protein L33-B	6.11	6.11	61.68	31.78	31.78	5
P22804	Protein transport protein BET1	2	2	13.38	13.38	13.38	1
P32867	Protein SSO1	6	11.32	23.79	23.79	23.79	6
P33421	Succinate dehydrogenase [ubiquinone] cytochrome b subunit, mitochondrial	2	2	6.566	5.556	5.556	2
P35691	Translationally-controlled tumor protein homolog	8.82	8.82	29.34	29.34	25.15	8
P38962	Golgi apparatus membrane protein TVP23	4.79	4.79	22.61	22.11	22.11	4
P10127	Alcohol dehydrogenase 4	26.06	26.06	48.95	48.95	48.95	24
P32379	Proteasome subunit alpha type-5	8.54	8.54	39.62	21.92	19.62	6
P40994	ADP-ribosylation factor 3	5.37	5.37	24.59	18.58	18.58	3
P36139	Protein PET10	16.75	16.76	55.83	50.53	40.28	11
P14832	Peptidyl-prolyl cis-trans isomerase	12.2	12.2	59.26	46.3	41.98	8
Q00711	Succinate dehydrogenase [ubiquinone] flavoprotein subunit, mitochondrial	20.19	20.19	38.28	21.88	19.84	11
P39105	Lysophospholipase 1	2.7	2.7	9.94	4.367	3.313	2
P41277	(DL)-glycerol-3-phosphatase 1	8.97	8.97	29.6	29.6	27.2	5
P0CX48	40S ribosomal protein S11-B	14.65	14.65	60.26	46.15	46.15	8
P16521	Elongation factor 3A	89.82	89.82	60.15	54.5	53.26	54
P29547	Elongation factor 1-gamma 1	15.45	20.08	50.36	37.59	26.75	12
Q03707	Inner nuclear membrane protein SRC1	8.48	8.48	14.15	8.153	6.475	6
P11745	Ran GTPase-activating protein 1	9.46	9.46	37.1	24.32	17.94	5
P40056	Golgi to ER traffic protein 2	7.85	7.85	19.65	19.65	19.65	4
P05317	60S acidic ribosomal protein P0	24.05	24.05	45.83	44.23	40.06	18
P32474	Protein disulfide-isomerase EUG1	13.35	13.35	23.98	18.38	18.38	7
P40312	Cytochrome b5	2	2	10.83	10.83	10.83	1
P53549	26S protease subunit RPT4	4.58	6.9	24.03	13.73	10.3	3
P16861	6-phosphofructokinase subunit alpha	49.09	49.09	50.05	41.64	34.95	25
P47154	CAAX prenyl protease 1	24.03	24.03	36.42	32.01	32.01	13
P38736	Golgi SNAP receptor complex member 1	8.53	8.53	51.57	31.39	31.39	5
P38911	FK506-binding nuclear protein	6	6	12.9	10.46	10.46	3
P38754	60S ribosomal protein L14-B	14.42	14.42	50	50	50	8
P05737	60S ribosomal protein L7-A	19.61	19.61	64.75	44.26	37.3	13
P32563	V-type proton ATPase subunit a, vacuolar isoform	38.9	38.9	35.48	30.12	25.48	23
P41940	Mannose-1-phosphate guanyltransferase	8.7	10.31	30.75	24.93	22.99	9
P53108	Protein YIP5	6	6	11.29	11.29	11.29	3
P10591	Heat shock protein SSA1	53.67	54.84	66.67	61.84	56.07	50
Q96VH5	Mitochondrial organizing structure protein 1	6	6	38.14	38.14	38.14	3
P17255	V-type proton ATPase catalytic subunit A	60.09	60.09	44.26	40.8	39.31	48
P41920	Ran-specific GTPase-activating protein 1	4.02	4.02	19.4	15.92	15.92	2
P12688	Serine/threonine-protein kinase YPK1	3.84	3.84	19.26	7.941	3.235	2
P32466	Low-affinity glucose transporter HXT3	12	12	23.63	18.87	18.87	6
P53834	Hsp90 co-chaperone HCH1	2.03	2.03	12.42	7.843	7.843	1
Q04439	Myosin-5	9.02	9.02	9.352	5.989	4.512	4
P35725	Uncharacterized protein YKL063C	3.83	3.84	38.32	23.35	23.35	3
P34240	Zinc-regulated transporter 3	4	4	5.964	5.964	5.964	3
P53721	Respiratory supercomplex factor 2, mitochondrial	2	2	24.55	4.911	4.911	1
P32861	UTP--glucose-1-phosphate uridylyltransferase	18.29	18.29	27.86	25.05	25.05	13
P25349	Flavoprotein-like protein YCP4	16.69	16.69	57.09	48.58	48.58	9
P38281	Actin patches distal protein 1	2.03	2.03	14.87	2.848	2.848	1
Q05785	Epsin-2	4	4	8.483	3.263	3.263	2
P0CX44	60S ribosomal protein L1-B	10.87	10.87	41.47	41.47	36.41	10
Q00764	Alpha,alpha-trehalose-phosphate synthase [UDP-forming] 56 kDa subunit	11.96	11.96	36.97	18.79	17.37	8
Q12349	ATP synthase subunit H, mitochondrial	4	4	18.55	18.55	18.55	3
P38845	Cruciform DNA-recognizing protein 1	21.09	21.09	25.38	24.09	20.22	10
P25580	Protein PBN1	10.97	10.97	16.35	16.35	16.35	6
P17967	Protein disulfide-isomerase	37.84	37.84	48.66	45.4	43.49	23
P22217	Thioredoxin-1	5.33	9.55	53.4	53.4	53.4	5
P00358	Glyceraldehyde-3-phosphate dehydrogenase 2	4	34.77	52.41	52.41	52.11	49
P26785	60S ribosomal protein L16-B	14.34	14.34	41.92	36.36	32.83	7
Q12306	Ubiquitin-like protein SMT3	5.6	5.6	39.6	39.6	39.6	4
P20107	Zinc/cadmium resistance protein	12	12	23.08	23.08	23.08	7
P07260	Eukaryotic translation initiation factor 4E	4.25	4.25	44.6	24.41	12.21	2
Q12117	Protein MRH1	8	8	16.88	16.88	16.88	4
P00925	Enolase 2	13.36	50.54	77.57	69.57	65.22	38
Q12029	Probable mitochondrial transport protein FSF1	12.28	14.09	40.06	29.05	26.91	9
P38998	Saccharopine dehydrogenase [NAD(+), L-lysine-forming]	3.79	3.79	14.21	8.043	8.043	3
P18414	ER lumen protein retaining receptor	3.01	3.01	10.96	10.96	10.96	2
P32468	Cell division control protein 12	30.69	30.69	57	49.14	49.14	18
Q05359	Protein ERP1	10.05	10.05	51.14	32.42	27.85	7
P37291	Serine hydroxymethyltransferase, cytosolic	32.16	32.16	53.3	48.83	42.43	16
P07264	3-isopropylmalate dehydratase	46.27	46.27	43.13	40.69	39.02	26
P50094	Inosine-5'-monophosphate dehydrogenase 4	11.89	11.89	20.23	18.13	18.13	7
Q12672	60S ribosomal protein L21-B	9.83	9.83	51.25	38.75	38.75	9
P23291	Casein kinase I homolog 1	6.39	11.63	26.58	17.47	16.36	7
P40416	Iron-sulfur clusters transporter ATM1, mitochondrial	6.26	7.56	10.29	8.696	8.696	5
P23641	Mitochondrial phosphate carrier protein	21.5	21.5	53.7	50.48	48.23	24
P32473	Pyruvate dehydrogenase E1 component subunit beta, mitochondrial	36.67	36.67	55.46	51.37	51.37	27
Q12125	Golgi to ER traffic protein 4	14.99	14.99	49.36	42.95	36.86	9
P27809	Glycolipid 2-alpha-mannosyltransferase	7.24	9.01	24.21	17.65	14.71	6
P38631	1,3-beta-glucan synthase component FKS1	46.87	46.87	27.19	21.27	16.68	26
P22214	Protein transport protein SEC22	10	10	36.45	32.24	32.24	5
P07259	Protein URA2	158.97	158.97	57.59	46.25	42.91	94
P23644	Mitochondrial import receptor subunit TOM40	14.88	14.88	62.02	48.84	45.22	14
P11632	Non-histone chromosomal protein 6A	6.64	6.64	44.09	44.09	44.09	5
P0C0V8	40S ribosomal protein S21-A	8.02	8.02	72.41	55.17	55.17	4
Q08959	Phosphatidylglycerol phospholipase C	10.08	10.08	31.78	24.92	20.87	5
P07143	Cytochrome c1, heme protein, mitochondrial	8.75	8.75	30.42	30.42	30.42	8
P31116	Homoserine dehydrogenase	3.21	3.21	13.65	11.14	5.571	2
P32836	GTP-binding nuclear protein GSP2/CNR2	8.69	8.69	42.27	31.36	31.36	6
P00330	Alcohol dehydrogenase 1	28.45	28.45	49.71	47.13	45.4	16
Q03691	Protein ROT1	2	2	13.28	6.641	6.641	1
P38234	Protein RFS1	8	10	31.43	31.43	31.43	7
P53206	Putative cysteine synthase	4.74	4.76	27.48	11.45	7.125	3
P32288	Glutamine synthetase	12.48	12.48	24.32	22.16	17.57	6
P07245	C-1-tetrahydrofolate synthase, cytoplasmic	46.78	46.78	46.72	35.73	30.23	25
P02829	ATP-dependent molecular chaperone HSP82	6.1	50.2	40.9	37.8	37.09	32
P0CX50	60S ribosomal protein L18-B	9.7	10.71	48.39	38.17	32.8	7
P15303	Protein transport protein SEC23	9.7	9.7	24.22	12.24	9.896	6
Q04792	Glutamate decarboxylase	2.66	2.66	4.957	3.761	3.761	2
P08539	Guanine nucleotide-binding protein alpha-1 subunit	2.64	2.64	23.52	5.085	5.085	2
P80967	Mitochondrial import receptor subunit TOM5	2	2	30	30	30	2
P56508	Protein SNA2	2	2	18.99	18.99	18.99	2
Q05022	rRNA biogenesis protein RRP5	27.28	27.28	23.71	14.11	13.01	16
P53228	Transaldolase NQM1	12.09	12.09	29.43	27.63	24.02	6
Q04062	26S proteasome regulatory subunit RPN9	6.86	6.86	27.99	15.27	10.94	4
P07560	Ras-related protein SEC4	15.72	19.87	68.84	59.07	56.28	10
P38339	RHO GTPase-activating protein RGD1	2.74	2.74	14.26	4.354	4.354	3
P34760	Peroxiredoxin TSA1	18.52	18.52	49.49	46.43	46.43	11
P50085	Prohibitin-2	16.13	17.92	37.1	24.84	24.84	10
Q00055	Glycerol-3-phosphate dehydrogenase [NAD(+)] 1	4.92	4.92	27.37	15.86	9.974	3
P47089	Translation machinery-associated protein 22	6.03	6.03	27.78	18.18	18.18	3
P36006	Myosin-3	4.1	6.17	13.36	2.83	2.83	3
P34222	Peptidyl-tRNA hydrolase 2	8.06	8.06	29.33	25	21.63	4
P40989	1,3-beta-glucan synthase component GSC2	19.2	44.76	27.76	20.58	16.73	23
P54003	Protein SUR7	5.51	5.51	23.18	21.19	21.19	3
P13586	Calcium-transporting ATPase 1	18.99	19.03	18.63	15.68	13.89	12
P46985	Probable alpha-1,6-mannosyltransferase MNN11	7.6	7.6	18.96	13.27	13.27	5
Q07551	NADPH-dependent alpha-keto amide reductase	24.84	24.84	65.38	61.54	59.29	15
P09624	Dihydrolipoyl dehydrogenase, mitochondrial	35.43	35.43	50.9	43.29	43.29	18
P07273	Transcription elongation factor S-II	2.06	2.06	16.5	6.796	2.589	1
P38720	6-phosphogluconate dehydrogenase, decarboxylating 1	35.49	35.49	52.97	46.01	44.17	19
P25618	Protein CWH43	6.04	6.04	4.827	4.197	4.197	4
P16474	78 kDa glucose-regulated protein homolog	46.96	49.18	61.73	47.36	42.38	29
P20424	Signal recognition particle subunit SRP54	2.72	2.73	14.23	4.806	4.806	2
P0CX40	40S ribosomal protein S8-B	10	10	40.5	34	34	9
P15019	Transaldolase	26.18	26.18	59.1	55.52	44.18	13
P04456	60S ribosomal protein L25	8	8	45.07	32.39	32.39	8
P07263	Histidine--tRNA ligase, mitochondrial	7.54	7.54	22.71	19.78	13.74	5
P41805	60S ribosomal protein L10	21.37	21.38	56.11	56.11	52.49	11
Q3E7X9	40S ribosomal protein S28-A	3.7	3.7	47.76	41.79	41.79	5
Q05050	Eisosome protein 1	76.18	76.18	64.65	49.94	49.94	45
O74700	Mitochondrial import inner membrane translocase subunit TIM9	4	4	43.68	31.03	31.03	2
P35719	Uncharacterized protein MRP8	3.3	3.3	30.59	16.44	13.7	3
P32857	Membrane protein PTM1	8.69	10.21	15.49	11.47	11.47	6
P07283	Phosphomannomutase	18.57	18.57	54.33	47.24	47.24	11
P03965	Carbamoyl-phosphate synthase arginine-specific large chain	12.08	15.75	22.81	13.15	10.91	9
P47176	Branched-chain-amino-acid aminotransferase, cytosolic	5.01	5.01	21.54	11.97	11.97	3
P38703	Sphingosine N-acyltransferase LAG1	4.8	4.8	7.543	7.543	7.543	3
P36112	Formation of crista junctions protein 1	8.54	8.54	27.41	16.85	13.33	5
Q12434	Rho GDP-dissociation inhibitor	9.49	9.49	56.44	41.09	41.09	5
P40319	Elongation of fatty acids protein 3	8.48	8.48	15.65	15.65	15.65	6
P46655	Glutamate--tRNA ligase, cytoplasmic	22.23	22.23	36.16	25.42	19.49	12
P00128	Cytochrome b-c1 complex subunit 7	8.36	8.36	65.35	46.46	46.46	7
P19073	Cell division control protein 42	8.02	8.02	23.56	20.42	20.42	4
P28321	Monoglyceride lipase	10.44	10.44	44.73	28.43	25.56	7
P20606	Small COPII coat GTPase SAR1	14	14	49.47	49.47	49.47	8
P0CX83	60S ribosomal protein L19-B	8.05	8.05	33.33	23.81	20.11	8
P60010	Actin	26.48	26.48	68.27	45.6	45.07	16
P35844	Protein KES1	11.92	11.92	24.88	22.35	20.74	9
Q03798	Altered inheritance of mitochondria protein 36, mitochondrial	10.64	10.64	38.82	34.12	29.41	7
Q04013	Mitochondrial DNA replication protein YHM2	14.14	14.14	37.26	31.85	21.97	9
P32795	Mitochondrial inner membrane i-AAA protease supercomplex subunit YME1	5.84	5.84	23.43	8.835	6.024	4
P54839	Hydroxymethylglutaryl-CoA synthase	4.65	4.65	11.61	8.758	6.517	2
P53220	Mitochondrial import inner membrane translocase subunit TIM21	3.72	3.72	12.13	7.113	7.113	2
P48558	Bax inhibitor 1	2	2	4.377	4.377	4.377	1
P00931	Tryptophan synthase	16.27	16.27	30.83	19.38	15.84	8
P38130	Probable mannosyltransferase KTR3	19.58	19.58	43.56	29.46	27.48	11
P31539	Heat shock protein 104	46.46	46.46	45.93	34.8	27.64	24
Q12447	Polyamine N-acetyltransferase 1	4.12	4.12	54.45	31.41	11.52	2
P04801	Threonine--tRNA ligase, cytoplasmic	27.93	27.93	33.38	24.52	22.89	16
P13663	Aspartate-semialdehyde dehydrogenase	4.89	4.89	15.62	7.945	7.945	3
Q06405	ATP synthase subunit f, mitochondrial	4.19	4.19	32.67	27.72	27.72	3
P25294	Protein SIS1	28.43	28.43	55.4	48.86	46.88	18
P46964	Dolichyl-diphosphooligosaccharide--protein glycosyltransferase subunit OST2	2.92	2.93	19.23	19.23	19.23	3
P53691	Peptidyl-prolyl cis-trans isomerase CPR6	2.41	4.57	14.82	7.547	6.469	5
P32891	D-lactate dehydrogenase [cytochrome] 1, mitochondrial	14.42	14.42	24.87	16.52	16.52	8
P23292	Casein kinase I homolog 2	18.49	18.49	30.77	25.82	24.73	11
Q00955	Acetyl-CoA carboxylase	99	99	46.13	31.62	27.05	52
Q12445	Nucleoporin POM34	3.09	3.09	13.04	5.017	5.017	2
Q12025	Uncharacterized protein YDR056C	3.69	3.69	23.9	17.07	17.07	3
P01120	Ras-like protein 2	12.14	12.14	43.17	27.33	27.33	8
P04147	Polyadenylate-binding protein, cytoplasmic and nuclear	34.5	34.5	52.86	48.7	43.15	18
P35176	Peptidyl-prolyl cis-trans isomerase D	3.19	5.37	28	20	20	3
P04449	60S ribosomal protein L24-A	14.28	14.28	40.65	34.84	30.97	9
P33333	Probable 1-acyl-sn-glycerol-3-phosphate acyltransferase	8.88	8.88	38.28	24.75	18.81	5
P22146	1,3-beta-glucanosyltransferase GAS1	12.87	12.87	22.18	16.46	16.46	8
P48563	Protein MON2	10.28	11.57	19.32	7.824	4.218	6
P39939	40S ribosomal protein S26-B	6.98	6.98	30.25	30.25	30.25	5
P23254	Transketolase 1	14.63	14.63	18.53	14.41	12.35	9
P39004	High-affinity hexose transporter HXT6	18.77	18.77	31.93	23.51	22.46	11
P47912	Long-chain-fatty-acid--CoA ligase 4	14.52	15.61	23.05	16.71	14.55	8
P0CX42	60S ribosomal protein L23-B	11.46	11.46	48.18	43.07	43.07	12
P36051	GPI ethanolamine phosphate transferase 1	13.92	13.92	15.13	9.14	9.14	8
Q05521	Diacylglycerol pyrophosphate phosphatase 1	6	6	22.15	22.15	22.15	3
P25373	Glutaredoxin-1	5.22	5.22	46.36	37.27	37.27	3
P25560	Protein RER1	5.74	5.74	29.79	25	25	3
P39968	Vacuolar protein 8	18.01	18.01	20.76	20.76	18.69	9
P05748	60S ribosomal protein L15-A	10.16	10.16	32.84	32.84	32.84	6
P49723	Ribonucleoside-diphosphate reductase small chain 2	13.46	13.46	41.45	36.52	20.58	8
P16862	6-phosphofructokinase subunit beta	56.19	58.08	55.47	48.8	48.07	32
P25045	Serine palmitoyltransferase 1	27.15	27.15	42.47	36.38	35.3	17
P17555	Adenylyl cyclase-associated protein	4.26	4.26	11.79	7.795	5.894	2
P25694	Cell division control protein 48	25.11	25.11	31.02	22.99	20.48	15
P05743	60S ribosomal protein L26-A	19.16	19.16	57.48	50.39	49.61	11
P11484	Heat shock protein SSB1	2.12	68.73	69.82	67.86	65.58	53
P07284	Serine--tRNA ligase, cytoplasmic	17.6	17.6	34.42	31.39	28.79	12
P10592	Heat shock protein SSA2	10.41	53.2	69.33	60.41	54.15	44
Q06505	Transcription factor SPN1	4.7	4.7	18.05	10	10	3
P39685	Nucleoporin POM152	29.57	29.57	32.91	17.5	17.5	18
P38286	Very-long-chain 3-oxoacyl-CoA reductase	10.02	10.02	24.78	19.31	19.31	9
P32602	Alpha-soluble NSF attachment protein	21.87	21.87	69.18	52.74	49.32	13
P38875	GPI transamidase component GPI16	15.36	15.36	20.98	20.16	20.16	8
P38221	Phosphatidate cytidylyltransferase	7.03	7.03	11.82	8.972	8.972	4
P09938	Ribonucleoside-diphosphate reductase small chain 1	11.49	11.49	20.8	17.79	17.79	6
Q03048	Cofilin	8	8	48.95	38.46	38.46	6
P16387	Pyruvate dehydrogenase E1 component subunit alpha, mitochondrial	67.77	67.77	78.1	77.86	75.71	66
Q12233	ATP synthase subunit g, mitochondrial	4.59	4.59	42.61	38.26	20	3
P20449	ATP-dependent RNA helicase DBP5	7.16	7.36	20.95	14.94	10.79	5
Q3E772	Uncharacterized protein YGR169C-A	2.71	2.71	28.26	28.26	28.26	2
Q12305	Thiosulfate sulfurtransferase RDL1, mitochondrial	6.03	6.03	39.57	39.57	39.57	4
P46784	40S ribosomal protein S10-B	4.97	4.97	48.57	38.1	38.1	4
Q99297	Mitochondrial 2-oxodicarboxylate carrier 2	6.08	6.09	34.85	22.8	16.29	4
P38355	Uncharacterized transporter YBR287W	6.99	6.99	17.8	13.11	13.11	5
Q04491	Protein transport protein SEC13	4	4	18.18	7.071	7.071	2
P30902	ATP synthase subunit d, mitochondrial	13.69	15.73	66.09	54.02	54.02	9
P09232	Cerevisin	11.65	11.65	18.58	12.13	10.87	8
P23639	Proteasome subunit alpha type-2	8.06	8.06	30	26.4	26.4	5
P39010	Palmitoyltransferase AKR1	10.76	10.76	21.07	9.686	8.639	7
P24000	60S ribosomal protein L24-B	2.16	12.73	40.65	34.84	30.97	8
P39958	Rab GDP-dissociation inhibitor	13.19	13.19	33.92	26.61	22.39	7
P0CX36	40S ribosomal protein S4-B	26.33	26.33	57.85	51.34	48.66	16
P26784	60S ribosomal protein L16-A	15.03	15.03	43.22	36.68	36.68	10
P46672	GU4 nucleic-binding protein 1	8.01	8.01	18.35	14.89	14.89	5
P40098	Uncharacterized mitochondrial membrane protein FMP10	3.39	3.39	38.11	10.66	10.66	2
P32803	Endosomal protein P24B	15.06	15.06	44.33	44.33	39.41	11
P32457	Cell division control protein 3	29.29	29.29	47.5	39.23	36.54	19
P24280	SEC14 cytosolic factor	9.73	9.73	36.84	23.36	20.72	5
P40150	Heat shock protein SSB2	4	66.8	66.72	62.48	59.71	55
P40303	Proteasome subunit alpha type-4	5.34	5.34	34.25	17.72	17.72	3
P00425	Cytochrome c oxidase polypeptide 5B, mitochondrial	10.89	10.89	47.68	39.07	39.07	6
P15891	Actin-binding protein	16.56	16.56	33.61	21.62	20.27	8
P29952	Mannose-6-phosphate isomerase	14.02	14.02	30.77	24.48	24.48	7
P38295	Medium-chain fatty acid ethyl ester synthase/esterase 2	28.17	28.17	46.34	40.35	34.15	16
P47818	Protein CCC1	3.94	3.94	16.77	9.317	9.317	2
P38081	Uncharacterized glycosyl hydrolase YBR056W	6.03	6.03	14.17	6.587	6.587	3
P25361	Uncharacterized protein YCR043C	2.27	2.27	42.52	42.52	33.07	2
Q08972	[NU+] prion formation protein 1	4.35	8.51	15.97	9.699	5.853	6
P06633	Imidazoleglycerol-phosphate dehydratase	7.56	7.56	28.64	20	20	4
Q3E754	40S ribosomal protein S21-B	4.93	4.93	48.28	40.23	40.23	4
P38314	Protein SDS24	7.47	7.48	16.7	13.09	13.09	4
P39109	Metal resistance protein YCF1	32.76	32.76	23.43	16.5	13.14	16
P22855	Alpha-mannosidase	40.56	40.56	32.04	27.05	23.55	21
P40483	Putative zinc metalloproteinase YIL108W	21.44	21.44	30.89	24.86	21.26	11
Q05567	Sphingosine-1-phosphate lyase	24.06	24.06	44.14	32.6	28.52	13
P21825	Translocation protein SEC62	8.56	8.56	29.56	29.56	25.18	8
P33297	26S protease regulatory subunit 6A	11.97	11.97	31.11	23.04	17.74	6
P47068	Myosin tail region-interacting protein MTI1	11.24	11.24	20.74	9.767	7.433	7
P33775	Dolichyl-phosphate-mannose--protein mannosyltransferase 1	28.16	28.16	29.5	22.64	22.64	16
P53633	Prenylated Rab acceptor 1	4.95	4.95	30.68	25.57	18.75	3
Q04969	Signal peptidase complex subunit SPC2	11.65	11.65	43.82	42.13	42.13	6
P46989	Autophagy-related protein 27	7.66	7.66	34.69	21.4	16.97	5
Q04067	Eukaryotic translation initiation factor 3 subunit G	7.06	7.06	37.96	27.01	21.17	4
Q05892	Uncharacterized protein YLR290C, mitochondrial	15.1	15.1	40.07	32.13	29.24	8
P14904	Vacuolar aminopeptidase 1	13.05	13.05	23.35	19.84	19.84	9
P38755	Oxysterol-binding protein homolog 7	3.6	3.74	13.73	10.53	6.407	2
P40548	HSP70 co-chaperone SNL1	2.92	2.92	35.85	23.27	18.24	2
Q01560	Nucleolar protein 3	4	4	15.46	5.072	5.072	2
P38764	26S proteasome regulatory subunit RPN1	18.69	18.69	21.45	16.11	12.19	10
P52910	Acetyl-coenzyme A synthetase 2	7.13	7.13	18.3	12.01	5.71	3
P32332	Mitochondrial oxaloacetate transport protein	10.15	10.15	36.11	22.22	19.75	6
P31382	Dolichyl-phosphate-mannose--protein mannosyltransferase 2	16.9	16.9	24.37	16.34	14.62	10
P14906	Protein translocation protein SEC63	30.06	30.06	32.74	30.21	28.42	18
P53903	Processing of GAS1 and ALP protein 2	9.31	9.31	46.51	37.98	37.98	8
P16140	V-type proton ATPase subunit B	29.58	29.58	51.45	41.39	39.26	16
P07251	ATP synthase subunit alpha, mitochondrial	53.58	53.58	58.9	57.61	55.6	47
Q06144	Protein ORM2	3.43	3.43	8.333	8.333	8.333	2
P39931	Protein SSP120	9.82	9.82	38.03	32.05	32.05	6
P20081	FK506-binding protein 1	7.52	7.52	40.35	40.35	40.35	4
P17649	4-aminobutyrate aminotransferase	4.66	4.66	13.8	8.917	8.917	3
P07342	Acetolactate synthase catalytic subunit, mitochondrial	18.99	18.99	24.45	20.67	20.67	10
Q08179	Mitochondrial distribution and morphology protein 38	16.87	16.87	28.27	21.29	21.29	9
P33767	Dolichyl-diphosphooligosaccharide--protein glycosyltransferase subunit WBP1	16.48	18.02	38.37	36.74	36.74	11
P22203	V-type proton ATPase subunit E	17.96	17.96	48.07	43.78	43.78	11
P40482	Protein transport protein SEC24	25.27	25.27	23	19.33	16.74	13
Q08144	T-SNARE affecting a late Golgi compartment protein 2	7.21	7.21	17.38	14.86	11.59	4
P53141	Myosin light chain 1	13.08	13.08	65.77	61.07	55.7	8
Q02776	Mitochondrial import inner membrane translocase subunit TIM50	19.82	19.82	46.43	27.94	25.42	12
P25340	Delta(24(24(1)))-sterol reductase	7.7	7.7	11.42	11.42	9.091	4
P00830	ATP synthase subunit beta, mitochondrial	50.22	50.22	68.1	64.38	64.38	28
P38431	Eukaryotic translation initiation factor 5	7.61	7.61	22.72	14.81	12.59	5
P39727	ER-derived vesicles protein ERV46	5.08	5.08	10.36	8.434	8.434	3
P17695	Glutaredoxin-2, mitochondrial	14.31	14.31	69.23	49.65	49.65	14
Q12450	Protein ERP4	2.41	4.22	34.3	12.56	12.56	3
P25371	Probable ATP-dependent permease	13.44	13.44	12.96	8.389	7.15	8
P05694	5-methyltetrahydropteroyltriglutamate--homocysteine methyltransferase	28.58	28.58	44.59	32.86	24.77	14
P38695	Probable glucose transporter HXT5	5.55	7.27	20.27	13.34	12.33	5
P18962	Dipeptidyl aminopeptidase B	3.32	3.32	20.42	5.012	5.012	4
P23638	Proteasome subunit alpha type-3	4.17	4.18	20.54	20.54	12.79	3
P40341	Mitochondrial respiratory chain complexes assembly protein YTA12	14.89	14.89	24.24	16.97	14.79	9
P53878	Uncharacterized oxidoreductase YNL181W	6.42	6.42	23.1	12.04	12.04	4
P38910	10 kDa heat shock protein, mitochondrial	13.11	13.11	70.75	70.75	70.75	12
P38226	Uncharacterized acyltransferase CST26	5.55	5.55	20.4	7.557	7.557	3
P32340	Rotenone-insensitive NADH-ubiquinone oxidoreductase, mitochondrial	34.09	34.09	55.56	50.68	50.68	24
P40517	Ran-specific GTPase-activating protein 2	2.79	2.79	24.46	10.4	7.951	2
P37012	Phosphoglucomutase-2	12.78	12.78	20.56	16.52	11.78	6
P40515	Mitochondria fission 1 protein	13.33	13.33	57.42	56.13	56.13	8
P53337	ER-derived vesicles protein ERV29	10.7	10.7	23.23	19.68	19.68	9
P41811	Coatomer subunit beta'	17.85	17.85	18.22	16.31	15.41	10
P47075	Vacuolar transporter chaperone 4	14.04	14.04	16.92	11.23	10.26	7
P21306	ATP synthase subunit epsilon, mitochondrial	8	8	56.45	56.45	56.45	5
Q04338	t-SNARE VTI1	8.27	8.27	33.18	27.65	27.65	6
P39925	Mitochondrial respiratory chain complexes assembly protein AFG3	7.06	10.22	21.02	9.987	6.307	5
P38199	Heterogeneous nuclear rnp K-like protein 2	2	2	3.15	3.15	3.15	1
P21147	Acyl-CoA desaturase 1	10.79	10.79	23.33	14.31	14.31	7
P0CX24	60S ribosomal protein L20-B	13.96	13.96	54.65	50	43.02	12
P36421	Tyrosine--tRNA ligase, cytoplasmic	7.78	7.78	21.32	12.18	12.18	5
P32621	Guanosine-diphosphatase	21.82	21.82	40.93	36.49	36.49	11
P10659	S-adenosylmethionine synthase 1	9.25	9.25	24.87	19.63	19.63	6
P32916	Signal recognition particle receptor subunit alpha homolog	15.96	15.96	37.52	21.42	20.45	9
P41338	Acetyl-CoA acetyltransferase	9.41	9.41	29.15	22.61	19.1	5
Q07478	ATP-dependent RNA helicase SUB2	6.7	6.7	23.32	17.04	11.88	4
Q00245	GTP-binding protein RHO3	6.4	6.4	23.81	19.05	16.02	3
P28496	Sphingosine N-acyltransferase LAC1	2.13	2.13	13.88	6.938	4.067	1
P38353	Sec sixty-one protein homolog	15.72	15.72	25.31	24.08	21.22	10
P32419	Malate dehydrogenase, peroxisomal	14.95	14.95	54.52	34.69	30.03	7
P18759	Vesicular-fusion protein SEC18	23.31	23.31	32.45	24.41	23.22	13
P32527	Zuotin	20.48	20.48	38.34	33.26	33.26	11
P07170	Adenylate kinase	9.21	9.21	46.4	27.48	27.48	5
P29311	Protein BMH1	16.94	16.94	56.55	42.32	42.32	9
P11655	Guanine nucleotide-exchange factor SEC12	8.02	8.02	13.38	10.83	10.83	4
P46971	Dolichyl-phosphate-mannose--protein mannosyltransferase 4	11.12	11.12	16.67	15.22	15.22	8
P38626	NADH-cytochrome b5 reductase 1	29.97	29.97	72.54	69.37	69.01	17
P32481	Eukaryotic translation initiation factor 2 subunit gamma	6.14	6.14	21.44	9.298	7.59	3
P38250	Increased sodium tolerance protein 2	20.85	20.85	29.81	16.28	15.12	12
P32319	Vacuolar protein sorting/targeting protein VPS10	33.48	33.48	27.8	17.92	12.86	16
P34248	Probable intramembrane protease YKL100C	6.65	6.65	14.65	5.963	5.963	5
P21375	Osmotic growth protein 1	5.09	5.09	19.16	12.97	12.97	5
P38694	Putative aldehyde dehydrogenase-like protein YHR039C	13.93	13.93	20.5	15.37	13.82	8
P32335	Protein MSS51, mitochondrial	13.43	13.43	40.14	22.48	18.12	6
Q03362	Uncharacterized protein YDR476C	6	6	19.2	19.2	19.2	4
Q06508	Lysophosphatidic acid:oleoyl-CoA acyltransferase 1	2	2	22	5.333	5.333	1
P05375	Phosphatidyl-N-methylethanolamine N-methyltransferase	3.89	3.89	18.93	11.65	11.65	2
Q04458	Fatty aldehyde dehydrogenase HFD1	22.46	22.46	32.71	27.44	24.44	13
P19955	37S ribosomal protein YMR-31, mitochondrial	6.18	6.18	47.15	47.15	47.15	4
P40413	T-complex protein 1 subunit epsilon	11.01	11.01	29	18.15	13.88	7
P16550	Protein APA1	6.23	6.23	35.2	24.61	22.12	4
P14742	Glutamine--fructose-6-phosphate aminotransferase [isomerizing]	17.08	17.08	29.99	20.78	15.9	9
P20485	Choline kinase	2.43	2.43	11.34	3.952	1.89	1
P39940	E3 ubiquitin-protein ligase RSP5	18.21	18.21	22.74	16.56	16.56	11
P33892	Translational activator GCN1	26.69	26.69	17.37	8.496	5.801	12
P32939	GTP-binding protein YPT7	14	14	56.25	51.44	51.44	7
P40959	Sorting nexin MVP1	3.34	3.34	21.72	9.589	5.479	2
P32352	C-8 sterol isomerase	6.11	6.11	22.52	22.52	19.37	4
Q08954	Smr domain-containing protein YPL199C	7.1	7.1	16.25	16.25	16.25	4
Q06252	Uncharacterized protein YLR179C	3.83	3.83	35.82	25.37	16.92	2
P41543	Dolichyl-diphosphooligosaccharide--protein glycosyltransferase subunit 1	13.81	13.81	33.19	22.27	20.59	11
P15705	Heat shock protein STI1	13.17	13.17	30.39	18.85	17.66	8
P40024	ABC transporter ATP-binding protein ARB1	32.43	32.43	35.41	33.61	29.51	17
Q12154	ATPase GET3	7.28	7.28	25.99	24.29	19.77	4
P26755	Replication factor A protein 3	3.74	3.74	27.05	27.05	27.05	3
P32629	Mannan polymerase II complex ANP1 subunit	7.89	7.89	12	9.4	9.4	4
P40215	External NADH-ubiquinone oxidoreductase 1, mitochondrial	33.94	33.94	46.61	34.82	33.57	23
P40553	Peroxiredoxin DOT5	5.35	5.35	32.09	24.19	19.07	4
P40527	Probable phospholipid-transporting ATPase NEO1	15.94	15.94	23.46	10.51	9.644	9
P35191	DnaJ homolog 1, mitochondrial	26.6	26.6	42.47	36.99	35.23	14
Q07651	SUR7 family protein FMP45	4	4	14.89	11.97	11.97	3
Q12213	60S ribosomal protein L7-B	20.96	20.96	49.59	49.59	41.39	13
P35179	Protein transport protein SSS1	3.07	3.07	31.25	22.5	22.5	2
Q99316	Protein disulfide isomerase MPD2	7.67	7.67	25.27	16.97	14.8	4
Q03559	Uncharacterized protein YMR295C	4	4	47.72	21.32	21.32	2
P34227	Mitochondrial peroxiredoxin PRX1	16.01	16.54	44.06	39.85	37.55	8
P25623	Suppressor of yeast profilin deletion	15.6	15.6	21.61	17.36	13.68	10
P06634	ATP-dependent RNA helicase DED1	22.39	24.3	44.21	29.64	27.65	13
P32835	GTP-binding nuclear protein GSP1/CNR1	11.07	11.07	50.68	36.53	36.53	10
P17709	Glucokinase-1	13.41	13.41	28.8	22.4	18.2	7
P36018	GTP-binding protein YPT52	11.42	11.42	52.14	35.04	32.05	6
P33298	26S protease regulatory subunit 6B homolog	6	8	32.71	14.95	14.95	5
P32449	Phospho-2-dehydro-3-deoxyheptonate aldolase, tyrosine-inhibited	4.03	4.03	13.78	7.027	7.027	2
P52871	Protein transport protein SBH2	2	2	14.77	14.77	14.77	2
P22137	Clathrin heavy chain	15.07	15.07	19.12	11.92	8.953	10
Q08822	Probable electron transfer flavoprotein-ubiquinone oxidoreductase, mitochondrial	14.08	14.08	34.23	16.8	13.79	7
P36081	Uncharacterized protein YKL077W	7.6	7.6	19.9	11.73	9.949	5
P53731	Actin-related protein 2/3 complex subunit 2	2.32	2.32	19.01	10.53	4.971	1
P05453	Eukaryotic peptide chain release factor GTP-binding subunit	25.05	25.05	27.45	21.31	18.83	13
P27514	Low-affinity phosphate transporter PHO91	2.67	2.67	6.823	2.461	2.461	2
Q12220	U3 small nucleolar RNA-associated protein 12	2.3	2.3	8.802	3.924	1.485	1
P32589	Heat shock protein homolog SSE1	35.81	35.81	54.11	39.39	37.37	19
Q99190	Very-long-chain enoyl-CoA reductase	11.67	11.67	17.1	17.1	14.52	7
P00958	Methionine--tRNA ligase, cytoplasmic	4.27	4.27	13.72	7.856	6.258	3
P53925	Uncharacterized vacuolar membrane protein YNL115C	26.36	26.36	38.04	28.57	27.17	16
P38137	Peroxisomal-coenzyme A synthetase	25.25	25.25	42.36	35.17	35.17	16
P38166	Protein transport protein SFT2	6	6	24.65	18.14	18.14	3
P36095	Vacuolar protein-sorting-associated protein 24	2.37	2.37	33.93	10.27	7.589	2
Q12363	Transcriptional modulator WTM1	9.5	9.5	18.76	18.31	18.31	6
P32582	Cystathionine beta-synthase	19.66	19.66	57.2	30.18	28.01	10
P28274	CTP synthase 1	4.4	4.4	11.4	7.254	5.872	3
P39078	T-complex protein 1 subunit delta	10.24	10.24	25.95	15.34	14.2	5
P14164	ARS-binding factor 1	3.95	3.95	4.241	4.241	3.01	2
P0CS90	Heat shock protein SSC1, mitochondrial	39.25	39.9	48.78	41.74	41.74	33
P39986	Probable cation-transporting ATPase 1	59.87	59.87	41.4	40.41	37.78	31
P06197	CDP-diacylglycerol--inositol 3-phosphatidyltransferase	13.42	13.42	50.45	35	35	8
P47079	T-complex protein 1 subunit theta	15.12	15.12	29.75	20.6	19.01	8
P38256	Uncharacterized protein YBR096W	3.44	3.45	22.17	13.04	10	2
P80210	Adenylosuccinate synthetase	10.9	10.9	27.25	24.02	20.32	7
P22336	Replication factor A protein 1	10.96	11.18	25.44	15.78	9.018	5
P10614	Lanosterol 14-alpha demethylase	14.6	14.6	29.43	21.13	19.43	7
Q03529	Ceramide very long chain fatty acid hydroxylase SCS7	8.72	8.72	19.79	19.79	17.97	5
P39742	Translocation protein SEC72	4.58	4.58	35.75	18.65	15.03	3
Q03532	ATP-dependent RNA helicase HAS1	20.97	20.97	28.32	25.54	23.17	12
P40030	Ergosterol biosynthetic protein 28	6.37	6.37	20.95	20.95	20.95	4
Q03558	NADPH dehydrogenase 2	8.61	8.61	31.25	17.5	13.75	4
P38131	Probable mannosyltransferase KTR4	6.06	6.06	24.14	9.483	9.483	3
P50095	Inosine-5'-monophosphate dehydrogenase 3	12.08	12.08	33.65	26.2	21.41	10
Q03434	Transposon Ty1-ML2 Gag-Pol polyprotein	64.13	64.13	34.87	29.23	28.26	78
P10080	Single-stranded nucleic acid-binding protein	10.37	10.37	30.95	18.37	18.37	6
Q08045	Long chronological lifespan protein 2	2.45	2.48	25.95	14.5	14.5	2
Q04493	Prefoldin subunit 5	2	2	14.72	6.135	6.135	1
P40212	60S ribosomal protein L13-B	19.28	19.29	61.31	49.25	38.69	11
P47035	Nucleolar protein NET1	10.37	10.37	10.85	6.644	5.467	5
Q04228	UBX domain-containing protein 2	3.62	3.62	14.73	7.534	5.479	3
P16622	Ferrochelatase, mitochondrial	15.54	17.52	44.78	31.55	29.77	11
P11633	Non-histone chromosomal protein 6B	2	2.55	21.21	21.21	21.21	2
P31412	V-type proton ATPase subunit C	8.05	8.05	34.18	25.26	11.99	3
P32381	Actin-related protein 2	11.9	11.9	32.74	29.92	26.85	7
P00815	Histidine biosynthesis trifunctional protein	14.19	14.19	32.67	18.15	12.02	7
P38627	CTP synthase 2	6.12	6.12	15.57	8.824	8.824	4
P41810	Coatomer subunit beta	6.56	6.56	15.72	6.578	5.961	4
P40540	ER membrane protein complex subunit 5	5.53	5.53	40.43	34.75	34.75	4
P32843	Mitochondrial escape protein 2	32.18	32.18	34.59	27.53	25.41	17
P53622	Coatomer subunit alpha	16.97	16.97	23.48	15.9	10.66	8
P25303	DnaJ-related protein SCJ1	26.72	26.72	64.46	49.34	46.95	16
P47082	Vacuolar amino acid transporter 1	3.09	3.09	10.13	7.143	5.15	2
P39076	T-complex protein 1 subunit beta	6.56	6.56	29.79	11.57	9.677	3
P43616	Cys-Gly metallodipeptidase DUG1	5.1	5.1	18.09	18.09	5.613	2
P14907	Nucleoporin NSP1	13.26	13.26	36.33	17.98	17.98	10
P04173	3-isopropylmalate dehydrogenase	23.67	23.67	64.29	49.73	45.88	13
P07262	NADP-specific glutamate dehydrogenase 1	21.8	21.8	54.19	40.53	31.94	10
P38817	ADP-ribosylation factor-binding protein GGA2	4.52	4.52	14.19	7.179	5.983	3
P25491	Mitochondrial protein import protein MAS5	16.23	16.23	37.9	33.01	31.05	9
P22517	Calcium/calmodulin-dependent protein kinase II	5.79	5.79	16.78	8.725	6.264	3
Q12464	RuvB-like protein 2	17.58	17.58	41.19	28.45	26.11	9
P40557	ER-retained PMA1-suppressing protein 1	3.76	6.03	25.11	6.134	6.134	4
P42945	U3 small nucleolar RNA-associated protein 10	3.51	3.51	7.179	2.318	1.3	2
P28007	H/ACA ribonucleoprotein complex subunit 1	4.82	4.82	27.32	17.56	17.56	3
P32356	Neutral trehalase	7.1	8.27	24.5	7.856	6.525	5
P48570	Homocitrate synthase, cytosolic isozyme	12.28	12.28	34.58	29.44	23.36	7
P38167	Protein ECM21	2.17	2.17	7.341	2.507	1.074	1
Q12449	Hsp90 co-chaperone AHA1	3.8	3.8	10.29	10.29	10.29	3
P38778	Manganese transporter SMF2	2.09	2.09	6.375	3.643	1.821	1
P32913	Vacuolar protein sorting-associated protein 17	5.07	5.07	22.69	9.619	4.9	2
P09734	Tubulin alpha-3 chain	4.33	8.7	17.08	17.08	15.51	5
Q03390	Vacuolar protein-sorting-associated protein 60	4	4	18.78	18.78	18.78	3
Q12402	Protein YOP1	5.89	5.89	29.59	19.9	19.9	6
P40087	DNA damage-inducible protein 1	2.18	2.18	13.08	9.346	3.505	2
P32500	Nucleoporin NDC1	8.3	8.3	22.14	13.44	9.618	5
P39111	V-type proton ATPase subunit F	3.31	3.31	27.12	22.03	22.03	2
P53319	6-phosphogluconate dehydrogenase, decarboxylating 2	6.74	10.83	28.05	19.51	19.51	8
Q3E846	Cytochrome c oxidase assembly factor 6	10.02	10.02	56.73	42.31	42.31	5
P27476	Nuclear localization sequence-binding protein	7.87	7.87	39.61	16.18	16.18	5
P47031	Mitochondrial outer membrane protein IML2	6.01	6.01	24.21	9.576	5.609	3
P36105	60S ribosomal protein L14-A	15.18	15.18	54.35	54.35	54.35	13
P32897	Mitochondrial import inner membrane translocase subunit TIM23	2.09	2.09	18.02	18.02	18.02	3
P25568	Autophagy-related protein 22	2.09	2.09	12.31	4.735	2.652	1
P31384	Glucose-repressible alcohol dehydrogenase transcriptional effector	4	4	4.182	3.226	3.226	2
P38129	Transcription initiation factor TFIID subunit 5	2.15	2.15	12.91	2.632	1.88	1
P32353	C-5 sterol desaturase	2.77	2.77	11.23	7.671	5.753	2
P28777	Chorismate synthase	3.17	3.17	24.73	8.245	8.245	2
P38264	Inorganic phosphate transport protein PHO88	15.4	15.4	65.96	55.32	55.32	10
Q03104	Meiotic sister chromatid recombination protein 1	53.96	53.96	61.4	57.12	55.56	35
P15732	Ubiquitin-conjugating enzyme E2-16 kDa	2	2	12.84	7.432	7.432	1
P12683	3-hydroxy-3-methylglutaryl-coenzyme A reductase 1	21.93	21.93	18.88	13.47	12.05	11
Q02326	60S ribosomal protein L6-A	21.23	21.23	70.45	59.09	55.11	13
P38811	Transcription-associated protein 1	2.49	2.51	5.823	1.042	0.187	1
P04802	Aspartate--tRNA ligase, cytoplasmic	7.92	7.92	26.39	11.49	11.49	4
P05374	Phosphatidylethanolamine N-methyltransferase	26.77	26.77	29.34	21.98	18.99	14
P32074	Coatomer subunit gamma	3.48	3.48	9.84	4.385	1.39	3
P11076	ADP-ribosylation factor 1	14.4	14.4	54.7	51.38	51.38	11
P0CX54	60S ribosomal protein L12-B	14.06	14.06	75.15	67.88	58.18	10
P02400	60S acidic ribosomal protein P2-beta	9.89	9.89	53.64	53.64	53.64	8
P07806	Valine--tRNA ligase, mitochondrial	2.97	2.97	10.42	2.446	2.446	2
Q12109	Tryptophan--tRNA ligase, cytoplasmic	4.34	4.34	25	9.954	7.639	3
P08067	Cytochrome b-c1 complex subunit Rieske, mitochondrial	14.01	14.01	53.49	41.86	41.86	10
Q08723	26S proteasome regulatory subunit RPN8	2.04	2.04	21.89	3.55	3.55	1
P29704	Squalene synthase	24.9	24.9	38.06	36.26	34.68	15
P11938	DNA-binding protein RAP1	3.82	3.82	4.353	3.023	3.023	2
Q04958	Lysophospholipase NTE1	10.97	10.97	13.94	4.884	3.335	5
Q04947	Reticulon-like protein 1	30.42	30.42	59.66	59.66	55.93	24
P36015	Synaptobrevin homolog YKT6	7.71	7.71	44.5	35	22.5	4
Q12452	3-keto-steroid reductase	4.9	4.9	27.67	14.41	7.493	2
Q06169	Peroxisomal membrane protein PEX30	9.19	9.19	20.08	16.25	16.25	6
P37020	Anion/proton exchange transporter GEF1	2.88	2.88	14.25	5.135	3.723	3
P40581	Peroxiredoxin HYR1	11.84	11.84	45.4	39.88	39.88	7
P42838	Alkylphosphocholine resistance protein LEM3	4.39	4.39	16.91	9.903	7.729	3
P40582	Glutathione S-transferase 1	11.2	11.2	41.03	32.05	31.62	6
Q12697	Vacuolar cation-transporting ATPase YPK9	3.15	3.15	6.861	3.125	1.698	2
Q08245	Protein ZEO1	29.46	29.46	93.81	76.99	71.68	20
P32472	Peptidyl-prolyl cis-trans isomerase FPR2	2.26	2.26	17.78	17.78	8.889	1
P32660	Phospholipid-transporting ATPase DNF1	13.03	13.03	17.38	7.511	5.474	8
Q12680	Glutamate synthase [NADH]	5.28	5.28	5.128	2.844	1.725	3
P40159	Uncharacterized protein YNL208W	15.26	15.26	80.4	75.88	75.88	10
P48231	Tricalbin-2	4.57	5.56	16.98	6.621	6.621	4
Q02486	ARS-binding factor 2, mitochondrial	11.4	11.4	46.45	41.53	36.61	7
Q08224	Hydroxymethylpyrimidine/phosphomethylpyrimidine kinase THI20	2.03	2.03	7.26	1.633	1.633	1
Q99287	Protein SEY1	34.19	34.19	42.91	27.71	23.71	17
P07281	40S ribosomal protein S19-B	13.93	13.93	57.64	50	50	12
P06738	Glycogen phosphorylase	25.59	25.59	26.05	17.18	14.97	16
P49626	60S ribosomal protein L4-B	32.87	32.87	53.31	52.76	52.76	19
Q12114	Chitin biosynthesis protein CHS5	2.02	2.02	5.216	1.788	1.788	1
Q01855	40S ribosomal protein S15	8	8	45.77	38.03	38.03	9
P00546	Cyclin-dependent kinase 1	2.68	2.68	28.52	10.07	6.376	2
P41807	V-type proton ATPase subunit H	7.77	7.77	41.42	18.2	9.205	4
P0C2H7	60S ribosomal protein L27-B	8.83	8.83	52.94	45.59	40.44	9
P0CX32	40S ribosomal protein S24-B	8.38	8.38	70.37	35.56	28.15	6
P32599	Fimbrin	14.94	14.94	26.17	17.29	14.49	7
Q06833	Uncharacterized PH domain-containing protein YPR091C	18.2	18.2	28.57	13.9	13.9	10
P38929	Calcium-transporting ATPase 2	14.43	14.43	26.68	9.633	8.184	7
P53115	Putative DNA helicase INO80	2.62	2.62	10.14	1.478	1.478	2
Q12466	Tricalbin-1	49.46	49.46	36.93	30.44	29.34	31
P08524	Farnesyl pyrophosphate synthase	6.92	6.92	21.88	13.07	13.07	4
P25619	30 kDa heat shock protein	4.17	4.17	10.24	10.24	8.434	3
P40335	Carboxypeptidase Y-deficient protein 8	2.77	2.78	21.37	5.541	5.541	2
P07257	Cytochrome b-c1 complex subunit 2, mitochondrial	32.01	32.01	58.42	48.91	44.57	21
P39524	Probable phospholipid-transporting ATPase DRS2	7.48	7.49	11.81	5.461	3.247	4
Q12284	FAD-linked sulfhydryl oxidase ERV2	4.01	4.01	20.41	12.24	12.24	2
P17076	60S ribosomal protein L8-A	2.23	15.57	54.69	44.53	37.11	8
P53199	Sterol-4-alpha-carboxylate 3-dehydrogenase, decarboxylating	16.09	16.09	43.84	36.68	32.66	8
P40533	Protein TED1	8.31	8.31	20.51	14.59	8.879	4
P40970	Serine palmitoyltransferase 2	24.92	24.92	39.93	32.62	28.52	13
P09457	ATP synthase subunit 5, mitochondrial	22	22	60.38	60.38	60.38	15
P38630	Replication factor C subunit 1	2.05	2.05	7.666	2.904	1.51	1
Q03103	Endoplasmic oxidoreductin-1	18.99	18.99	28.06	23.45	19.18	10
P21243	Proteasome subunit alpha type-1	5.59	5.59	38.89	24.21	17.86	4
Q12443	Reticulon-like protein 2	29.32	29.32	64.38	45.55	45.55	20
P38999	Saccharopine dehydrogenase [NADP(+), L-glutamate-forming]	2.07	2.07	19.06	6.502	4.26	2
P14020	Dolichol-phosphate mannosyltransferase	24.59	24.59	60.3	59.18	59.18	18
Q12164	Pore membrane protein of 33 kDa	7.06	7.06	17.56	17.56	15.05	7
P39077	T-complex protein 1 subunit gamma	9.63	9.92	35.58	17.79	13.86	5
Q12133	Signal peptidase complex subunit SPC3	8	8	33.15	24.46	24.46	4
P25342	Cell division control protein 10	18.99	20.34	63.35	59.63	44.1	12
P14120	60S ribosomal protein L30	13.03	13.03	68.57	68.57	68.57	12
Q12406	Actin-related protein 7	2.64	2.88	9.853	6.08	4.612	2
P38687	Signal recognition particle subunit SRP68	2.03	2.03	11.19	1.503	1.503	1
P09733	Tubulin alpha-1 chain	7.49	7.49	12.98	12.98	12.98	5
P15454	Guanylate kinase	6.32	6.32	44.92	25.67	25.67	5
P39517	ATP-dependent RNA helicase DHH1	5.86	5.86	15.42	10.08	7.905	3
P38011	Guanine nucleotide-binding protein subunit beta-like protein	15.99	15.99	38.87	38.87	24.76	7
P32191	Glycerol-3-phosphate dehydrogenase, mitochondrial	41.91	41.91	45.61	37.9	36.52	21
P15367	Signal peptidase complex catalytic subunit SEC11	5.28	5.28	27.54	27.54	19.76	4
P36108	DOA4-independent degradation protein 4	4.02	4.02	12.93	9.914	9.914	2
P02557	Tubulin beta chain	8.16	8.16	17.51	14	14	6
P24783	ATP-dependent RNA helicase DBP2	4.21	8.52	27.47	11.72	10.07	5
Q07825	Putative Xaa-Pro aminopeptidase FRA1	19.22	19.22	23.1	19.23	18.42	10
P32590	Heat shock protein homolog SSE2	7.71	16.65	32.18	20.06	15.01	9
Q12499	Nucleolar protein 58	13.39	13.39	41.88	22.9	19.57	9
P40075	Vesicle-associated membrane protein-associated protein SCS2	20.66	20.66	59.43	55.33	55.33	13
Q12690	60S ribosomal protein L13-A	15.92	15.92	47.74	47.74	40.7	9
P07213	Mitochondrial import receptor subunit TOM70	29.52	29.52	53.81	44.08	34.85	14
Q12010	Uncharacterized membrane protein YOL092W	4	4	12.01	12.01	9.74	2
P32597	Nuclear protein STH1/NPS1	9.96	10.03	16.04	7.064	4.194	5
P42943	T-complex protein 1 subunit eta	9.6	9.6	26.36	14.73	12.73	5
P25365	Putative guanine nucleotide-exchange factor SED4	5.77	5.77	9.765	4.507	4.507	4
P25443	40S ribosomal protein S2	23.41	23.41	64.17	61.42	61.42	15
P21965	Protein kinase MCK1	16.35	16.35	42.13	30.4	27.2	8
Q04767	Golgi apparatus membrane protein TVP18	3.35	3.35	31.74	23.95	23.95	4
P38177	Uncharacterized protein YBL086C	2.01	2.01	4.506	3.219	3.219	2
P17891	Clathrin light chain	4.76	4.76	31.76	14.59	14.59	3
P40327	26S protease regulatory subunit 4 homolog	6.82	6.82	24.94	14.65	14.65	4
P38079	Protein YRO2	2.01	6.19	18.31	13.08	9.593	6
P43609	Chromatin structure-remodeling complex protein RSC8	6.68	6.68	21.36	13.29	11.13	5
P28625	Protein YIM1	12.91	12.91	36.99	32.05	30.41	11
P08566	Pentafunctional AROM polypeptide	16.57	16.57	20.34	12.22	7.494	8
P38230	Probable quinone oxidoreductase	14.08	14.08	45.81	29.34	25.45	7
P40531	Protein GVP36	20.9	20.9	49.39	44.17	42.02	13
P49167	60S ribosomal protein L38	6	6	41.03	41.03	41.03	7
P05756	40S ribosomal protein S13	15.84	15.84	60.93	57.62	57.62	13
P25574	ER membrane protein complex subunit 1	22.62	22.62	26.32	23.55	20.66	13
P0CX38	40S ribosomal protein S6-B	18.44	18.44	58.05	42.8	40.25	14
P39704	Protein ERP2	5.52	5.52	35.81	25.58	25.58	4
P32368	Phosphoinositide phosphatase SAC1	41.1	41.1	60.51	47.35	46.07	23
P07267	Saccharopepsin	18.86	18.86	42.47	36.79	35.31	12
P30657	Proteasome subunit beta type-7	2.65	2.65	19.55	15.41	3.383	1
P08456	CDP-diacylglycerol--serine O-phosphatidyltransferase	6	6	13.04	13.04	13.04	4
P0C0W9	60S ribosomal protein L11-A	8.39	8.39	44.83	27.59	27.59	6
P43585	Vacuolar transporter chaperone 2	17.68	17.74	28.86	17.27	12.92	9
P36017	Vacuolar protein sorting-associated protein 21	14.02	14.02	41.9	41.9	41.9	7
P26786	40S ribosomal protein S7-A	19.25	19.25	70	56.32	53.16	11
P51996	GTP-binding protein YPT32/YPT11	12.83	12.83	43.69	40.54	36.94	8
P43535	Protein GCN20	7.33	7.33	13.16	7.713	6.25	5
Q07541	Uncharacterized protein YDL121C	3.36	3.36	47.65	28.86	18.12	2
Q03940	RuvB-like protein 1	17.04	17.04	40.39	32.61	32.61	11
Q07451	Endoplasmic reticulum transmembrane protein 3	15.19	15.19	40.39	40.39	36.45	9
Q12460	Nucleolar protein 56	20.79	20.79	45.04	37.9	31.75	12
P22147	5'-3' exoribonuclease 1	8.73	8.73	11.39	4.647	3.469	5
Q6Q547	H/ACA ribonucleoprotein complex subunit 3	2	2	29.31	20.69	20.69	1
P02294	Histone H2B.2	7.54	7.54	38.93	34.35	34.35	9
P35723	Endoplasmic reticulum transmembrane protein 1	16	16	44.17	44.17	44.17	10
P33299	26S protease regulatory subunit 7 homolog	8.45	10.89	34.05	18.84	13.06	5
P43558	Ubiquitin thioesterase OTU1	2.97	2.97	14.62	9.302	9.302	2
P54783	D-arabinono-1,4-lactone oxidase	43.71	43.71	47.34	43.54	42.02	27
P32458	Cell division control protein 11	8.48	8.48	30.12	22.65	16.39	5
P13185	Serine/threonine protein kinase KIN1	3.78	3.78	18.89	4.135	4.135	4
P38555	GTP-binding protein YPT31/YPT8	2	11.52	39.01	35.87	32.29	7
P47160	Epsin-3	6.18	6.18	22.79	18.63	9.069	4
P26637	Leucine--tRNA ligase, cytoplasmic	13.91	13.91	27.71	10.73	6.972	7
P43636	Alpha-1,3/1,6-mannosyltransferase ALG2	5.04	5.04	15.71	11.93	9.94	4
Q3E7Y3	40S ribosomal protein S22-B	9.29	9.29	62.31	56.92	50	9
P47133	ER membrane protein complex subunit 2	12.83	12.83	31.16	27.4	27.4	7
P12612	T-complex protein 1 subunit alpha	12.1	12.1	21.82	16.28	14.85	8
Q12746	Plasma membrane-associated coenzyme Q6 reductase PGA3	20.07	20.07	50.32	47.12	45.19	13
Q05948	Uncharacterized SVF1-like protein YLR225C	8.07	8.07	20.15	15.48	13.02	4
P40528	Protein SYG1	4.06	4.11	12.75	6.652	6.098	3
Q3E757	60S ribosomal protein L11-B	10.82	10.82	36.21	29.89	29.89	7
P30624	Long-chain-fatty-acid--CoA ligase 1	49.2	49.23	60.71	51.43	48	30
Q02457	Protein TBF1	2.31	2.31	9.609	5.16	4.093	2
P32565	26S proteasome regulatory subunit RPN2	19.79	19.79	19.68	14.81	11.85	10
P0CX56	40S ribosomal protein S18-B	12	12	54.79	50	45.21	15
P07244	Bifunctional purine biosynthetic protein ADE5,7	8.8	8.8	23.19	11.85	7.606	4
Q12451	Oxysterol-binding protein homolog 2	2.63	2.64	10.21	3.274	1.793	2
P0CX52	40S ribosomal protein S16-B	15.95	15.95	58.04	50.35	50.35	11
P53174	Pheromone-regulated membrane protein 8	3.46	3.46	24.47	7.173	7.173	2
Q06705	Phosphatidylinositol transfer protein CSR1	5.15	5.15	14.22	11.27	11.27	4
P26783	40S ribosomal protein S5	20.35	20.35	45.78	45.78	45.78	12
P46990	60S ribosomal protein L17-B	10	10	36.41	36.41	36.41	11
P53040	Transcription initiation factor TFIID subunit 6	4.6	4.6	17.25	12.6	8.527	3
P38775	Putative uncharacterized protein YHR045W	7.14	7.14	13.04	13.04	9.643	4
P32386	ATP-dependent bile acid permease	48.25	48.25	25.89	18.36	15.71	24
P53860	Phosphatidylinositol transfer protein PDR16	4.8	4.8	15.95	11.68	9.402	3
P53073	ER membrane protein complex subunit 4	11.19	11.19	41.58	38.95	38.95	8
P21242	Probable proteasome subunit alpha type-7	6.67	6.67	20.83	15.97	12.85	3
P18239	ADP,ATP carrier protein 2	33.32	33.32	59.75	46.23	46.23	29
Q99260	GTP-binding protein YPT6	3.71	5.9	36.28	16.28	16.28	3
P53723	UPF0674 endoplasmic reticulum membrane protein YNR021W	17.91	17.91	36.39	30.94	25.99	10
P43555	Protein EMP47	22.62	23.1	53.26	42.02	38.88	14
Q07878	Vacuolar protein sorting-associated protein 13	2.27	2.28	6.775	1.368	0.6043	1
Q04697	Glucose-signaling factor 2	31.97	31.97	47.64	43.42	43.42	22
Q04080	GPI transamidase component GPI17	7.12	7.12	22.28	13.3	10.49	4
Q05812	Meiotic sister-chromatid recombination protein 3	4.53	4.53	17.45	5.632	2.885	2
P25343	Reduced viability upon starvation protein 161	20.34	20.34	74.34	56.98	52.08	12
P48164	40S ribosomal protein S7-B	16.11	16.11	53.68	48.95	48.95	11
Q08548	Lysophospholipid acyltransferase	8.68	10.4	20.84	10.66	10.66	7
P06787	Calmodulin	6.04	6.04	46.26	46.26	29.93	6
P02406	60S ribosomal protein L28	4.63	4.63	31.54	22.82	22.82	5
P05740	60S ribosomal protein L17-A	2	10	36.41	36.41	36.41	11
P38934	Nuclear segregation protein BFR1	19.53	19.53	38.72	26.17	24.47	11
Q12329	Heat shock protein 42	11.06	11.06	32.27	27.47	27.47	8
Q05775	Eukaryotic translation initiation factor 3 subunit J	5.33	5.33	26.42	13.96	13.96	4
P32528	Urea amidolyase	15.97	15.97	14.6	6.54	5.286	9
Q12078	Iron transporter SMF3	2.5	2.5	11.42	8.034	6.342	4
P14126	60S ribosomal protein L3	32.46	32.46	53.75	46.77	46.77	20
P54837	Endoplasmic reticulum vesicle protein 25	15.93	15.93	50.71	45.02	44.08	8
P61830	Histone H3	6.85	6.85	30.15	24.26	24.26	4
P06105	Protein SCP160	29.63	29.63	30.11	16.2	15.22	15
P46956	Inorganic phosphate transporter PHO86	8.42	8.42	23.79	18.33	15.43	5
P04786	DNA topoisomerase 1	5.43	5.43	12.61	5.722	3.641	3
P0CX26	60S ribosomal protein L43-B	8	8	41.3	41.3	41.3	4
P40217	Eukaryotic translation initiation factor 3 subunit I	7.39	7.39	36.31	26.22	21.04	4
P01123	GTP-binding protein YPT1	21.79	21.79	65.53	65.53	60.68	13
P15646	rRNA 2'-O-methyltransferase fibrillarin	15.54	15.54	56.57	36.09	36.09	9
P25567	RNA-binding protein SRO9	2.01	2.01	23.73	4.608	4.608	1
P53730	Dol-P-Man:Man(7)GlcNAc(2)-PP-Dol alpha-1,6-mannosyltransferase	4.91	4.91	7.441	6.171	6.171	3
P53075	Sensitivity to high expression protein 10	18.33	18.33	24.44	20.28	19.24	12
P49334	Mitochondrial import receptor subunit TOM22	7.13	7.13	34.21	34.21	28.95	6
P34730	Protein BMH2	2	11.37	34.43	34.43	26.01	6
P39101	Protein CAJ1	18.25	18.25	36.32	31.71	30.18	9
P32583	Suppressor protein SRP40	2.35	2.35	9.36	5.665	2.956	1
Q07657	Seventh homolog of septin 1	8.3	8.3	18.51	10.89	9.074	5
P20967	2-oxoglutarate dehydrogenase, mitochondrial	24.76	26.36	27.61	21.1	17.95	14
P05750	40S ribosomal protein S3	28.84	28.84	69.58	60.83	57.5	18
P27810	Alpha-1,2 mannosyltransferase KTR1	14.77	14.77	33.08	31.3	17.3	7
P0C2H8	60S ribosomal protein L31-A	12.02	12.02	75.22	54.87	54.87	8
P32445	Single-stranded DNA-binding protein RIM1, mitochondrial	3.28	3.28	22.22	22.22	17.78	3
P48606	Tubulin-specific chaperone A	2	2	12.26	12.26	12.26	1
P39079	T-complex protein 1 subunit zeta	4.49	4.49	23.08	9.341	5.678	3
P27614	Carboxypeptidase S	8.05	8.05	23.61	15.28	10.24	5
P04050	DNA-directed RNA polymerase II subunit RPB1	49.23	49.23	29.26	21.87	18.93	29
P10081	ATP-dependent RNA helicase eIF4A	21.73	21.73	49.87	45.57	38.23	11
P32486	Beta-glucan synthesis-associated protein KRE6	4.02	4.02	6.944	3.889	3.889	2
P40008	Protein FMP52, mitochondrial	15.09	15.09	58.01	51.52	51.52	9
P15625	Phenylalanine--tRNA ligase alpha subunit	3.73	3.73	22.66	4.175	4.175	2
P38715	NADPH-dependent aldose reductase GRE3	2.81	2.81	13.76	8.257	8.257	2
P25555	Single-strand telomeric DNA-binding protein GBP2	4	4.01	7.728	6.323	6.323	2
P39954	Adenosylhomocysteinase	15.5	15.5	33.85	23.39	21.16	9
P35845	Oxysterol-binding protein homolog 1	2.9	2.9	9.512	1.936	1.936	2
P53898	Protein NSG2	2.19	2.19	32.11	16.05	11.71	5
P15108	ATP-dependent molecular chaperone HSC82	53.93	53.93	44.26	39.15	39.15	34
P21954	Isocitrate dehydrogenase [NADP], mitochondrial	28.63	28.63	42.29	36.68	36.68	15
P47008	Phosphatidylinositol transfer protein SFH5	3.55	3.55	25.85	11.9	6.463	2
P15992	Heat shock protein 26	30.2	30.2	65.42	62.62	61.68	39
P12695	Dihydrolipoyllysine-residue acetyltransferase component of pyruvate dehydrogenase complex, mitochondrial	49.76	49.76	70.95	60.79	60.79	50
P39929	Vacuolar-sorting protein SNF7	4	4	13.75	13.75	13.75	3
Q12032	Altered inheritance of mitochondria protein 41, mitochondrial	8.56	8.56	40.54	35.68	35.14	6
P0CX85	60S ribosomal protein L35-B	13.33	13.33	47.5	36.67	36.67	7
Q03640	Tricalbin-3	80.5	82.26	47.64	40.39	39.55	46
P35180	Mitochondrial import receptor subunit TOM20	5.69	5.69	27.87	27.87	21.86	4
P10622	60S acidic ribosomal protein P1-beta	2.06	2.06	33.02	33.02	33.02	5
P48236	Uncharacterized membrane protein YGR149W	2	2	7.87	2.083	2.083	1
Q05123	Actin-like protein ARP9	6.02	6.02	16.49	6.852	6.852	3
P07278	cAMP-dependent protein kinase regulatory subunit	6.78	6.78	35.34	17.79	11.54	4
P46654	40S ribosomal protein S0-B	13.1	13.1	43.65	43.65	43.65	8
Q12159	RNA annealing protein YRA1	10.6	10.6	36.28	27.88	27.88	7
P38069	Alpha-1,2-mannosyltransferase MNN2	29.16	29.16	38.69	36.18	31.99	15
P22696	Peptidyl-prolyl cis-trans isomerase ESS1	6.83	6.83	42.35	30	30	4
P32802	Transmembrane 9 superfamily member 1	12.41	12.41	16.49	14.09	11.99	6
P54115	Magnesium-activated aldehyde dehydrogenase, cytosolic	6.81	6.81	29.6	16	8.8	4
P22202	Heat shock protein SSA4	3.43	26.08	25.55	25.08	22.74	21
Q03648	Uncharacterized protein YMR209C	3.57	3.57	11.38	5.033	5.033	2
P34216	EH domain-containing and endocytosis protein 1	9.32	9.32	13.69	9.124	4.055	4
P43603	LAS seventeen-binding protein 3	7.35	7.35	14.38	9.368	9.368	4
P39743	Reduced viability upon starvation protein 167	12.67	12.67	34.23	29.05	29.05	9
P38061	60S ribosomal protein L32	12.98	12.98	67.69	45.38	40.77	7
P34237	Protein CASP	9.6	9.6	30.34	11.05	11.05	8
P16451	Pyruvate dehydrogenase complex protein X component, mitochondrial	20.46	20.46	59.76	46.1	44.63	18
P38428	Coupling of ubiquitin conjugation to ER degradation protein 1	9.57	9.57	58.62	57.64	46.8	7
P36010	Nucleoside diphosphate kinase	8.37	8.37	43.14	35.29	35.29	5
P36148	Glycerol-3-phosphate O-acyltransferase 2	10.13	10.13	26.51	18.3	12.11	6
Q02785	ATP-dependent permease PDR12	4.13	4.14	6.817	2.846	2.846	3
P38077	ATP synthase subunit gamma, mitochondrial	27.33	27.33	69.13	55.95	51.13	18
Q03690	Clustered mitochondria protein 1	33.92	33.92	21.46	17.46	16.68	18
P12385	Eukaryotic peptide chain release factor subunit 1	25.78	25.78	44.39	37.99	34.55	13
P38427	Trehalose synthase complex regulatory subunit TSL1	36.57	36.57	34.88	23.95	21.31	19
P07703	DNA-directed RNA polymerases I and III subunit RPAC1	2.41	2.41	18.21	8.955	3.582	1
Q12211	tRNA pseudouridine synthase 1	2	2.01	6.618	3.309	3.309	1
P37296	V-type proton ATPase subunit a, Golgi isoform	10.89	10.9	15.62	10.22	9.438	8
P38689	Ribose-phosphate pyrophosphokinase 3	2	2	16.56	3.125	3.125	1
P53868	Alpha-1,2-mannosyltransferase ALG9	14.76	14.76	20.18	19.1	19.1	8
P39516	40S ribosomal protein S14-B	19.92	19.92	68.84	63.77	63.77	13
P18562	Uracil phosphoribosyltransferase	2	2.03	23.15	5.556	5.556	1
P21576	Vacuolar protein sorting-associated protein 1	49.97	49.97	58.24	50.85	46.31	26
P06168	Ketol-acid reductoisomerase, mitochondrial	18.52	18.52	36.71	34.68	33.16	10
P19262	Dihydrolipoyllysine-residue succinyltransferase component of 2-oxoglutarate dehydrogenase complex, mitochondrial	22.74	22.74	30.67	28.29	26.57	13
P53192	Golgi to ER traffic protein 1	8.43	8.43	28.94	26.38	22.55	5
P48439	Dolichyl-diphosphooligosaccharide--protein glycosyltransferase subunit 3	9.29	9.29	16.57	16.57	14.86	5
P06103	Eukaryotic translation initiation factor 3 subunit B	13.78	13.79	26.34	15.6	11.01	7
P05738	60S ribosomal protein L9-A	14.44	14.44	47.12	44.5	40.84	10
P32366	V-type proton ATPase subunit d	23.13	23.13	59.42	44.35	42.03	14
P23248	40S ribosomal protein S1-B	4.44	22.28	67.84	59.22	50.98	14
P53221	60S ribosomal protein L26-B	19.34	19.34	55.91	49.61	49.61	13
P25087	Sterol 24-C-methyltransferase	30.94	30.94	57.96	51.44	51.44	18
P38088	Glycine--tRNA ligase 1, mitochondrial	12.96	12.96	21.3	13.48	12.17	7
P16603	NADPH--cytochrome P450 reductase	26.98	26.98	47.32	32.56	29.52	14
P0CX46	60S ribosomal protein L2-B	14.65	14.65	33.86	30.31	30.31	10
P46982	Alpha-1,2-mannosyltransferase MNN5	7.02	7.02	18.26	16.38	10.92	5
P38219	Obg-like ATPase 1	35.24	35.24	66.24	59.64	57.87	19
P0C2H9	60S ribosomal protein L31-B	9.55	9.55	54.87	54.87	54.87	5
P51401	60S ribosomal protein L9-B	2	12.41	43.46	40.84	37.17	9
P04806	Hexokinase-1	46.55	46.55	71.55	61.44	61.44	26
O14467	Multiprotein-bridging factor 1	11.92	11.92	40.4	39.74	39.74	8
P32915	Protein transport protein SEC61	10.8	10.8	22.71	17.92	14.37	7
P40471	NADPH-dependent 1-acyldihydroxyacetone phosphate reductase	12.04	12.04	33.33	30.64	30.64	10
P38701	40S ribosomal protein S20	12.23	12.23	52.07	51.24	51.24	11
P26321	60S ribosomal protein L5	8.24	8.24	53.54	37.37	31.65	6
P39107	Mannan polymerase complexes subunit MNN9	10.74	10.74	20.25	15.7	11.9	5
P33754	Translocation protein SEC66	10	10	45.15	32.52	27.18	6
P23642	Mannan polymerase I complex VAN1 subunit	8	8	20.93	13.08	13.08	4
P38711	40S ribosomal protein S27-B	6.02	6.02	46.34	36.59	36.59	5
P15703	Glucan 1,3-beta-glucosidase	6	6	16.29	11.5	11.5	3
P05755	40S ribosomal protein S9-B	16.96	16.96	44.62	44.62	44.62	11
P39007	Dolichyl-diphosphooligosaccharide--protein glycosyltransferase subunit STT3	15.13	15.13	16.16	10.03	8.914	10
P06780	GTP-binding protein RHO1	18.44	18.44	59.33	59.33	59.33	10
Q02795	Dolichyl-diphosphooligosaccharide--protein glycosyltransferase subunit SWP1	7.12	7.12	17.83	17.83	17.83	5
P02309	Histone H4	8.77	8.82	50.49	40.78	40.78	9
P39015	Suppressor protein STM1	15.51	15.51	56.78	53.48	53.48	13
P04807	Hexokinase-2	24.44	28.41	53.7	42.8	39.71	15
P36008	Elongation factor 1-gamma 2	29.26	29.26	51.21	40.78	38.83	24
P0CX30	40S ribosomal protein S23-B	9.77	9.77	65.52	48.97	44.14	7
Q12230	Sphingolipid long chain base-responsive protein LSP1	32.44	34.85	63.64	60.41	55.43	29
P05318	60S acidic ribosomal protein P1-alpha	4	4	28.3	28.3	28.3	2

## Sheet: 2_proteins
Table S1-2. Protein identification results for 531 proteins with TU:BL ratios
NOTES:
1) Unused score and total score indicate confidencde of protein identification by ProteinPilot.
2) %Cov, %Cov(50), %Cov(95) refer to the protein sequence coverage based on all identified peptides, or peptides above 50% or 95% confidence.
3) Peptides(95%) refers to the number of peptides identified above 95% confidence.
Uniprot Accession	Protein description	Unused score	Total score	%Cov	%Cov(50)	%Cov(95)	Peptides(95%)
Q12402	Protein YOP1	8	8	32.65	26.02	26.02	4
Q03104	Meiotic sister chromatid recombination protein 1	34.04	34.04	61.6	43.08	40.35	20
Q04947	Reticulon-like protein 1	35.52	35.52	60	60	60	26
Q12443	Reticulon-like protein 2	19.49	19.49	45.04	37.66	35.88	12
P16451	Pyruvate dehydrogenase complex protein X component, mitochondrial	4.77	4.77	22.2	11.95	11.95	3
P38230	Probable quinone oxidoreductase	14.08	14.08	45.81	29.34	25.45	7
Q06169	Peroxisomal membrane protein PEX30	9.62	9.62	22.37	14.15	14.15	5
Q03103	Endoplasmic oxidoreductin-1	26.24	26.24	47.6	35.88	33.75	16
P40159	Uncharacterized protein YNL208W	8.07	8.07	40.2	40.2	40.2	5
P14020	Dolichol-phosphate mannosyltransferase	24.78	24.78	66.29	59.55	53.93	18
Q12164	Pore membrane protein of 33 kDa	7.96	7.96	18.64	15.05	15.05	5
Q04697	Glucose-signaling factor 2	23.46	23.46	40.2	36.23	36.23	13
P46990	60S ribosomal protein L17-B	15.07	15.07	50	48.37	45.11	18
Q12746	Plasma membrane-associated coenzyme Q6 reductase PGA3	14.95	14.95	48.4	40.06	36.54	9
Q06833	Uncharacterized PH domain-containing protein YPR091C	18.03	18.03	35.84	16.62	16.62	10
P53199	Sterol-4-alpha-carboxylate 3-dehydrogenase, decarboxylating	8.74	8.74	32.66	21.78	17.19	4
P38264	Inorganic phosphate transport protein PHO88	6	6	22.34	22.34	22.34	4
Q03640	Tricalbin-3	80.51	80.51	48.03	43.5	43.5	46
Q08245	Protein ZEO1	14	14	37.17	30.97	30.97	9
P40008	Protein FMP52, mitochondrial	8.13	8.13	32.9	29.87	23.38	4
P38079	Protein YRO2	4.22	4.22	12.79	11.34	9.593	2
P40075	Vesicle-associated membrane protein-associated protein SCS2	20.4	20.4	67.21	59.02	59.02	16
P54837	Endoplasmic reticulum vesicle protein 25	5.91	5.91	43.13	43.13	36.02	4
Q07541	Uncharacterized protein YDL121C	2	2	12.08	12.08	12.08	1
P40970	Serine palmitoyltransferase 2	19.64	19.64	30.84	25.85	25.85	11
P28625	Protein YIM1	8	8	23.84	13.42	13.42	6
P35723	Endoplasmic reticulum transmembrane protein 1	7.37	7.37	37.38	33.98	33.98	6
P39704	Protein ERP2	7.52	7.53	35.81	35.81	29.3	5
Q07451	Endoplasmic reticulum transmembrane protein 3	6.02	6.02	25.12	16.75	16.75	3
P08456	CDP-diacylglycerol--serine O-phosphatidyltransferase	2	2	11.59	11.59	11.59	2
P43603	LAS seventeen-binding protein 3	17.44	17.44	43.36	28.98	28.98	10
Q99287	Protein SEY1	17.95	17.95	20.62	16.88	14.82	10
P46982	Alpha-1,2-mannosyltransferase MNN5	8.77	8.77	23.55	10.41	10.41	5
P29704	Squalene synthase	18.71	18.71	31.98	27.03	25.45	9
P39007	Dolichyl-diphosphooligosaccharide--protein glycosyltransferase subunit STT3	8.09	8.09	15.18	5.71	4.596	5
Q03648	Uncharacterized protein YMR209C	2.83	2.83	14	4.158	4.158	2
P53723	UPF0674 endoplasmic reticulum membrane protein YNR021W	12.23	12.23	28.71	20.79	16.34	6
P05374	Phosphatidylethanolamine N-methyltransferase	13.55	13.55	19.22	12.08	9.091	8
P33754	Translocation protein SEC66	2.78	2.78	18.45	8.738	8.738	2
P36148	Glycerol-3-phosphate O-acyltransferase 2	3.26	3.26	11.17	5.249	3.365	2
P15646	rRNA 2'-O-methyltransferase fibrillarin	19.45	19.45	59.63	43.43	33.64	12
P38177	Uncharacterized protein YBL086C	2	2	13.73	3.219	3.219	1
P32366	V-type proton ATPase subunit d	4	4	15.94	9.565	9.565	3
P05755	40S ribosomal protein S9-B	24.11	24.11	53.85	50.26	50.26	16
Q12284	FAD-linked sulfhydryl oxidase ERV2	2	2	23.47	6.633	6.633	1
P39015	Suppressor protein STM1	16.04	16.04	44.69	40.29	40.29	13
P23642	Mannan polymerase I complex VAN1 subunit	5.49	5.49	16.82	8.972	8.972	3
Q12133	Signal peptidase complex subunit SPC3	2.26	2.26	20.11	12.5	12.5	2
P25574	ER membrane protein complex subunit 1	6	6	8.421	4.342	4.342	3
P16603	NADPH--cytochrome P450 reductase	38.2	38.2	52.68	49.06	42.69	22
P43555	Protein EMP47	15.62	15.62	34.38	30.11	28.31	10
P38427	Trehalose synthase complex regulatory subunit TSL1	17.45	17.45	18.49	11.75	10.66	10
P43585	Vacuolar transporter chaperone 2	4.46	4.49	9.42	4.952	3.261	2
Q02795	Dolichyl-diphosphooligosaccharide--protein glycosyltransferase subunit SWP1	6.08	6.08	17.13	17.13	17.13	4
P24783	ATP-dependent RNA helicase DBP2	22.2	26.01	41.03	31.68	31.68	14
P47133	ER membrane protein complex subunit 2	5	5	26.03	23.97	12.67	3
Q05812	Meiotic sister-chromatid recombination protein 3	6.57	6.57	21.43	7.83	6.044	3
P32915	Protein transport protein SEC61	7.52	7.52	12.5	10.42	8.333	5
P18562	Uracil phosphoribosyltransferase	2	2.03	23.15	5.556	5.556	1
P48231	Tricalbin-2	18.82	20.92	19.19	13.92	13.92	11
P32583	Suppressor protein SRP40	2	2	2.709	2.709	2.709	1
Q04767	Golgi apparatus membrane protein TVP18	3.35	3.35	31.74	23.95	23.95	4
P12385	Eukaryotic peptide chain release factor subunit 1	10.09	10.09	23.11	16.93	13.5	5
P06787	Calmodulin	6.13	6.13	61.22	36.05	27.21	3
P39107	Mannan polymerase complexes subunit MNN9	8.66	8.66	23.04	12.15	12.15	5
P15992	Heat shock protein 26	24.76	24.76	67.29	57.01	57.01	28
P36017	Vacuolar protein sorting-associated protein 21	2.95	2.95	36.67	20.48	15.71	2
Q12466	Tricalbin-1	43.39	43.39	41.48	37.61	30.78	28
P38428	Coupling of ubiquitin conjugation to ER degradation protein 1	4.53	4.53	38.42	33.99	28.08	4
P53073	ER membrane protein complex subunit 4	4.01	4.01	43.16	12.63	12.63	2
P39524	Probable phospholipid-transporting ATPase DRS2	2	2	9.446	0.6642	0.6642	1
P26321	60S ribosomal protein L5	23.62	23.62	66.33	66.33	64.31	15
P09733	Tubulin alpha-1 chain	6.27	6.27	20.36	17.9	13.2	5
P06105	Protein SCP160	14.17	14.17	20.13	9.574	7.201	7
Q12452	3-keto-steroid reductase	2.96	2.96	25.36	5.764	5.764	2
P48236	Uncharacterized membrane protein YGR149W	2	2	7.87	2.083	2.083	1
P15367	Signal peptidase complex catalytic subunit SEC11	2.01	2.01	13.77	10.18	10.18	1
Q99260	GTP-binding protein YPT6	9.87	12.01	40.93	32.56	26.05	6
P40533	Protein TED1	7.55	7.55	22.83	8.668	8.668	4
Q12460	Nucleolar protein 56	22.43	22.43	37.1	33.73	31.35	13
P39929	Vacuolar-sorting protein SNF7	2	2	18.33	3.333	3.333	1
P32368	Phosphoinositide phosphatase SAC1	34.95	34.95	45.59	40.45	38.84	20
P38711	40S ribosomal protein S27-B	5.08	5.08	46.34	46.34	46.34	5
P39106	Alpha-1,3-mannosyltransferase MNN1	2.01	2.01	9.318	3.281	1.444	1
P07281	40S ribosomal protein S19-B	20.73	20.73	75.69	61.11	57.64	20
P53192	Golgi to ER traffic protein 1	4.78	4.78	16.6	14.47	14.47	3
P15703	Glucan 1,3-beta-glucosidase	4	4	20.45	7.348	7.348	2
P40582	Glutathione S-transferase 1	3.78	3.78	14.1	14.1	10.26	2
Q12499	Nucleolar protein 58	12	12	19.57	17.03	17.03	6
P27476	Nuclear localization sequence-binding protein	10.67	10.67	31.4	17.39	14.73	7
O14467	Multiprotein-bridging factor 1	11.96	11.96	45.03	39.74	39.74	12
P32599	Fimbrin	6.35	6.35	15.89	9.813	8.1	3
P53075	Sensitivity to high expression protein 10	3.39	3.39	23.22	5.199	3.813	2
P06103	Eukaryotic translation initiation factor 3 subunit B	11.09	11.09	13.76	10.09	10.09	6
P17076	60S ribosomal protein L8-A	6	27.84	63.67	54.3	54.3	24
P0CX30	40S ribosomal protein S23-B	7.33	7.33	57.93	42.76	42.76	7
P15108	ATP-dependent molecular chaperone HSC82	36.19	36.19	37.3	30.35	30.35	18
P51401	60S ribosomal protein L9-B	24.12	24.12	65.97	62.83	60.73	25
P27810	Alpha-1,2 mannosyltransferase KTR1	4.74	4.74	17.05	10.69	10.69	4
P37296	V-type proton ATPase subunit a, Golgi isoform	2.03	2.09	8.652	2.584	1.124	1
P0CX38	40S ribosomal protein S6-B	13.92	13.92	52.12	41.1	32.2	9
P10081	ATP-dependent RNA helicase eIF4A	18.04	18.04	39.49	34.68	34.43	11
P38219	Obg-like ATPase 1	20.65	20.65	55.08	43.91	34.01	11
P05738	60S ribosomal protein L9-A	3.29	23.99	65.97	62.83	60.73	26
P47160	Epsin-3	4	4	13.48	5.147	5.147	2
P38701	40S ribosomal protein S20	10.04	10.04	43.8	38.02	38.02	9
P06738	Glycogen phosphorylase	17.92	17.92	33.48	17.07	15.52	10
P12683	3-hydroxy-3-methylglutaryl-coenzyme A reductase 1	4	4	9.013	3.036	1.708	2
P04806	Hexokinase-1	35.54	35.54	60.41	56.49	50.72	20
Q02486	ARS-binding factor 2, mitochondrial	5.77	5.77	38.8	19.67	19.67	4
P40217	Eukaryotic translation initiation factor 3 subunit I	2.34	2.34	12.39	6.916	3.458	1
P34237	Protein CASP	11.86	11.86	30.63	15.91	10.6	6
P11076	ADP-ribosylation factor 1	12	12	47.51	43.65	43.65	9
P25343	Reduced viability upon starvation protein 161	5.9	5.9	49.43	30.57	25.66	5
P61830	Histone H3	3.3	3.3	14.71	11.76	11.76	2
P32472	Peptidyl-prolyl cis-trans isomerase FPR2	10	10	50.37	50.37	50.37	5
P0C2H9	60S ribosomal protein L31-B	12.79	12.79	69.91	62.83	56.64	7
P02309	Histone H4	7.75	7.75	38.83	38.83	38.83	5
Q03690	Clustered mitochondria protein 1	16.08	16.08	16.13	8.849	7.674	8
P54115	Magnesium-activated aldehyde dehydrogenase, cytosolic	12.98	12.98	19	14	14	8
P07244	Bifunctional purine biosynthetic protein ADE5,7	8.17	8.19	15.71	11.72	8.728	5
Q05775	Eukaryotic translation initiation factor 3 subunit J	3.82	3.82	9.811	9.811	9.811	2
P43535	Protein GCN20	3.24	3.24	18.35	4.255	4.255	3
P39743	Reduced viability upon starvation protein 167	4.26	4.26	18.46	16.8	10.79	3
Q3E7Y3	40S ribosomal protein S22-B	14.04	14.04	73.85	73.85	73.85	18
P36108	DOA4-independent degradation protein 4	4	4	24.14	9.914	9.914	2
P02557	Tubulin beta chain	7.62	7.62	17.72	15.54	10.07	4
P21965	Protein kinase MCK1	9.2	9.2	21.33	13.33	13.33	5
Q04958	Lysophospholipase NTE1	2.03	2.03	13.76	0.536	0.536	1
P46654	40S ribosomal protein S0-B	12.3	12.3	50.4	47.62	47.62	8
P49167	60S ribosomal protein L38	8.1	8.1	51.28	42.31	42.31	8
P0C2H7	60S ribosomal protein L27-B	11.01	11.01	44.85	44.85	44.85	9
P30624	Long-chain-fatty-acid--CoA ligase 1	32.2	32.2	37.71	30.43	30.43	20
P02294	Histone H2B.2	2.78	2.78	32.06	22.14	13.74	2
P25567	RNA-binding protein SRO9	5	5	29.72	10.37	10.37	3
P33299	26S protease regulatory subunit 7 homolog	4.01	6.01	13.92	7.066	7.066	3
P18239	ADP,ATP carrier protein 2	9.51	9.54	26.1	21.07	17.92	5
P25087	Sterol 24-C-methyltransferase	36.11	36.11	61.1	57.18	54.05	20
P38555	GTP-binding protein YPT31/YPT8	6.03	8.14	43.5	26.46	23.77	5
Q08548	Lysophospholipid acyltransferase	5.06	5.06	17.29	5.977	5.977	3
P40327	26S protease regulatory subunit 4 homolog	5.42	5.42	16.25	11.9	9.382	3
P05318	60S acidic ribosomal protein P1-alpha	4	4	43.4	43.4	43.4	3
Q02326	60S ribosomal protein L6-A	22.51	22.51	65.91	58.52	58.52	13
P32386	ATP-dependent bile acid permease	4.08	4.08	9.994	2.769	2.348	3
P06168	Ketol-acid reductoisomerase, mitochondrial	16.14	16.14	40.51	33.16	33.16	9
P43636	Alpha-1,3/1,6-mannosyltransferase ALG2	4	4	8.35	8.35	8.35	2
P39517	ATP-dependent RNA helicase DHH1	5.29	5.29	21.15	7.115	7.115	3
P32565	26S proteasome regulatory subunit RPN2	5.19	5.19	13.86	6.243	2.646	3
P01123	GTP-binding protein YPT1	22.19	22.19	64.56	64.56	56.8	15
P10622	60S acidic ribosomal protein P1-beta	4	4	33.02	33.02	33.02	3
Q03940	RuvB-like protein 1	5.53	5.6	17.49	10.58	9.287	4
P42943	T-complex protein 1 subunit eta	2.02	2.02	10.73	6.182	6.182	2
P08524	Farnesyl pyrophosphate synthase	2.01	2.01	7.102	2.841	2.841	1
P38069	Alpha-1,2-mannosyltransferase MNN2	13.2	13.2	36.85	27.97	23.45	9
P53221	60S ribosomal protein L26-B	21.03	21.03	61.42	54.33	48.82	12
P0CX54	60S ribosomal protein L12-B	14.08	14.08	71.52	56.36	56.36	12
P19262	Dihydrolipoyllysine-residue succinyltransferase component of 2-oxoglutarate dehydrogenase complex, mitochondrial	4.29	4.29	16.63	7.775	6.263	2
P53860	Phosphatidylinositol transfer protein PDR16	3.88	3.88	19.09	11.11	8.832	3
P54783	D-arabinono-1,4-lactone oxidase	2.01	2.01	11.6	2.852	2.852	1
P02400	60S acidic ribosomal protein P2-beta	6	6	33.64	33.64	33.64	4
P06780	GTP-binding protein RHO1	12.82	12.82	69.86	64.59	64.11	8
Q07825	Putative Xaa-Pro aminopeptidase FRA1	7.81	7.81	21.09	10.28	10.28	6
P26786	40S ribosomal protein S7-A	12.69	19.06	62.63	58.95	55.26	20
P0CX46	60S ribosomal protein L2-B	17.85	17.85	39.37	36.22	36.22	15
P12612	T-complex protein 1 subunit alpha	6.41	6.41	26.65	10.91	9.481	4
P39077	T-complex protein 1 subunit gamma	2	2	8.052	2.06	2.06	1
P14126	60S ribosomal protein L3	25.44	25.44	40.05	33.85	32.04	17
P09457	ATP synthase subunit 5, mitochondrial	7.82	7.82	29.25	24.53	24.53	5
P14120	60S ribosomal protein L30	12.36	12.36	68.57	68.57	62.86	10
P21576	Vacuolar protein sorting-associated protein 1	36.92	36.92	52.41	44.6	39.06	22
P25443	40S ribosomal protein S2	30.97	30.97	67.32	63.39	63.39	25
P36105	60S ribosomal protein L14-A	17.32	17.32	50.72	50.72	44.93	13
P13185	Serine/threonine protein kinase KIN1	2.04	2.04	9.117	1.504	1.504	1
P38077	ATP synthase subunit gamma, mitochondrial	15.96	15.96	37.62	34.08	34.08	8
P0C2H8	60S ribosomal protein L31-A	2	12.79	69.91	62.83	56.64	7
P20967	2-oxoglutarate dehydrogenase, mitochondrial	15.29	15.29	27.91	17.36	16.27	11
P22147	5'-3' exoribonuclease 1	2.18	2.18	7.919	1.309	0.589	1
P0CX85	60S ribosomal protein L35-B	19.44	19.44	52.5	44.17	44.17	16
P40531	Protein GVP36	21.54	21.54	57.06	42.64	42.64	12
P05740	60S ribosomal protein L17-A	2	18	46.74	41.3	41.3	18
Q12680	Glutamate synthase [NADH]	5.28	5.28	5.128	2.844	1.725	3
P0CX26	60S ribosomal protein L43-B	9.02	9.02	52.17	52.17	52.17	6
Q12230	Sphingolipid long chain base-responsive protein LSP1	14.22	18.05	45.16	38.12	35.19	11
P23248	40S ribosomal protein S1-B	25.7	25.7	60.78	60.39	56.86	19
Q12451	Oxysterol-binding protein homolog 2	2.05	2.05	14.34	1.715	0.7794	1
P04807	Hexokinase-2	22.58	22.83	41.98	36.83	35.19	13
P02406	60S ribosomal protein L28	9.41	9.41	42.95	35.57	30.2	8
P05756	40S ribosomal protein S13	19.47	19.47	61.59	58.28	58.28	15
P32353	C-5 sterol desaturase	2.99	2.99	7.945	5.753	5.753	2
P21954	Isocitrate dehydrogenase [NADP], mitochondrial	12.87	12.87	25.23	22.9	21.03	7
P32074	Coatomer subunit gamma	2.02	2.02	16.15	1.176	1.176	1
P0CX56	40S ribosomal protein S18-B	15.93	15.93	63.7	54.11	54.11	15
Q12032	Altered inheritance of mitochondria protein 41, mitochondrial	2.19	2.19	33.51	14.59	7.027	1
P36008	Elongation factor 1-gamma 2	18.02	18.02	26.94	25.24	25.24	11
P05750	40S ribosomal protein S3	30.1	30.1	71.25	68.75	62.5	19
Q01855	40S ribosomal protein S15	12.01	12.01	57.04	57.04	57.04	18
P0CX52	40S ribosomal protein S16-B	19.35	19.35	65.73	65.73	65.73	15
P39935	Eukaryotic initiation factor 4F subunit p150	7.29	7.29	16.18	5.567	5.567	4
P38934	Nuclear segregation protein BFR1	24.99	25	35.96	32.77	28.72	14
P49626	60S ribosomal protein L4-B	45.2	45.2	64.09	63.26	62.71	37
Q12159	RNA annealing protein YRA1	14.4	14.4	53.54	35.4	32.3	9
P26783	40S ribosomal protein S5	29.97	29.97	63.11	59.11	59.11	23
P48164	40S ribosomal protein S7-B	19.92	19.92	68.42	64.74	61.05	20
Q12690	60S ribosomal protein L13-A	18.7	18.7	52.76	45.23	39.2	13
P0C0W9	60S ribosomal protein L11-A	11.58	11.58	43.68	35.06	27.59	7
Q3E757	60S ribosomal protein L11-B	12.71	12.71	55.75	41.95	41.95	10
P38061	60S ribosomal protein L32	14.81	14.81	50	45.38	45.38	14
Q6Q547	H/ACA ribonucleoprotein complex subunit 3	3.92	3.92	32.76	32.76	32.76	2
P39516	40S ribosomal protein S14-B	18.17	18.17	61.59	61.59	61.59	20
P0CX32	40S ribosomal protein S24-B	12.26	12.26	45.19	45.19	36.3	10
P12695	Dihydrolipoyllysine-residue acetyltransferase component of pyruvate dehydrogenase complex, mitochondrial	31.58	31.58	66.39	56.43	55.19	22
P42945	U3 small nucleolar RNA-associated protein 10	3.51	3.51	7.179	2.318	1.3	2
P28007	H/ACA ribonucleoprotein complex subunit 1	3.83	3.83	25.37	15.12	8.78	2
P32356	Neutral trehalase	18.92	18.92	34.75	21.44	21.44	11
P48570	Homocitrate synthase, cytosolic isozyme	23.92	23.92	48.83	47.2	47.2	14
P38167	Protein ECM21	2.17	2.17	7.341	2.507	1.074	1
Q12449	Hsp90 co-chaperone AHA1	3.8	3.8	10.29	10.29	10.29	3
P38778	Manganese transporter SMF2	2.09	2.09	6.375	3.643	1.821	1
P32913	Vacuolar protein sorting-associated protein 17	5.07	5.07	22.69	9.619	4.9	2
P09734	Tubulin alpha-3 chain	2.34	2.34	6.517	6.517	2.921	1
Q03390	Vacuolar protein-sorting-associated protein 60	4	4	18.78	18.78	18.78	3
P07278	cAMP-dependent protein kinase regulatory subunit	6.78	6.78	35.34	17.79	11.54	4
Q07657	Seventh homolog of septin 1	8.87	8.87	27.95	17.06	8.53	4
P46956	Inorganic phosphate transporter PHO86	2.78	2.78	24.76	10.93	8.039	2
P51996	GTP-binding protein YPT32/YPT11	12.83	12.83	43.69	40.54	36.94	8
P17891	Clathrin light chain	3.04	3.04	31.76	15.88	11.16	2
P38687	Signal recognition particle subunit SRP68	2.03	2.03	11.19	1.503	1.503	1
P25342	Cell division control protein 10	18.99	20.34	63.35	59.63	44.1	12
P53040	Transcription initiation factor TFIID subunit 6	4.6	4.6	17.25	12.6	8.527	3
Q02457	Protein TBF1	2.31	2.31	9.609	5.16	4.093	2
P08566	Pentafunctional AROM polypeptide	16.57	16.57	20.34	12.22	7.494	8
P34730	Protein BMH2	2	11.37	34.43	34.43	26.01	6
P39079	T-complex protein 1 subunit zeta	4.49	4.49	23.08	9.341	5.678	3
P32597	Nuclear protein STH1/NPS1	9.96	10.03	16.04	7.064	4.194	5
P53898	Protein NSG2	2	2	15.72	4.348	4.348	1
P32528	Urea amidolyase	12.61	12.61	15.42	6.866	5.286	7
P27614	Carboxypeptidase S	8.05	8.05	23.61	15.28	10.24	5
P04786	DNA topoisomerase 1	4.01	4.01	13.52	2.731	2.731	2
P16862	6-phosphofructokinase subunit beta	24.25	24.25	29.82	25.55	24.4	16
Q01939	26S protease regulatory subunit 8 homolog	4.1	6.13	24.94	11.6	11.6	4
P16387	Pyruvate dehydrogenase E1 component subunit alpha, mitochondrial	70.22	70.22	81.19	81.19	77.38	46
P32473	Pyruvate dehydrogenase E1 component subunit beta, mitochondrial	23.84	23.84	47.81	41.8	41.8	15
Q12335	Protoplast secreted protein 2	6	6	23.74	23.74	23.74	4
P38910	10 kDa heat shock protein, mitochondrial	7.53	7.53	67.92	67.92	60.38	5
P50109	Protein PSP2	15.94	15.94	28.33	20.91	19.73	8
P10614	Lanosterol 14-alpha demethylase	10.27	10.27	24.34	16.6	13.02	5
P33297	26S protease regulatory subunit 6A	10.32	10.32	40.09	29.03	18.43	6
P32527	Zuotin	11.81	11.81	33.49	24.02	24.02	8
P07259	Protein URA2	178.63	178.63	57.68	54.61	52.98	111
P07264	3-isopropylmalate dehydratase	37	37	44.67	33.89	30.81	19
P38788	Ribosome-associated complex subunit SSZ1	23.45	23.45	41.08	30.3	30.3	13
P31688	Trehalose-phosphatase	5.69	5.69	14.62	6.473	5.357	3
P40517	Ran-specific GTPase-activating protein 2	2	2	10.4	3.058	3.058	1
P07283	Phosphomannomutase	10.7	10.7	38.19	34.65	31.89	6
P32589	Heat shock protein homolog SSE1	17.12	17.12	28.14	20.78	20.78	10
Q06177	Translation machinery-associated protein 10	2	2	33.72	23.26	23.26	1
P45978	Protein SCD6	3.18	3.18	26.65	13.18	13.18	4
P07149	Fatty acid synthase subunit beta	88.24	88.24	41.35	31.98	29.89	48
P15019	Transaldolase	2.55	2.55	18.51	7.761	5.075	2
P32476	Squalene monooxygenase	6.66	6.66	23.99	9.879	8.468	4
P47075	Vacuolar transporter chaperone 4	4.31	4.31	16.92	7.212	3.051	2
P37012	Phosphoglucomutase-2	2.09	2.09	6.678	3.691	1.933	1
P53154	Glycerol uptake protein 1	2	2	5.536	1.429	1.429	1
P41058	40S ribosomal protein S29-B	4.41	6.59	76.79	69.64	51.79	7
P01120	Ras-like protein 2	4	4	34.16	7.143	7.143	3
P20107	Zinc/cadmium resistance protein	3.82	3.82	11.76	8.597	8.597	2
P38137	Peroxisomal-coenzyme A synthetase	7.56	7.56	28.91	16.21	11.42	4
P05030	Plasma membrane ATPase 1	44.66	44.66	37.04	35.62	35.62	25
P32563	V-type proton ATPase subunit a, vacuolar isoform	24.26	24.26	23.1	19.05	18.21	12
P32471	Elongation factor 1-beta	4.11	4.11	32.04	17.96	17.96	3
P39078	T-complex protein 1 subunit delta	12.31	12.31	29.73	24.62	20.64	7
P19097	Fatty acid synthase subunit alpha	86.35	86.35	45.79	37.68	36.35	57
P53252	Sphingolipid long chain base-responsive protein PIL1	21.89	21.89	51.03	45.72	45.72	16
P40040	Protein THO1	4	4	14.22	10.55	10.55	2
P39931	Protein SSP120	2.09	2.09	11.11	11.11	5.128	1
P53549	26S protease subunit RPT4	8.06	8.06	36.16	15.33	15.33	4
P16521	Elongation factor 3A	69.01	69.01	50	44.92	42.82	47
P46989	Autophagy-related protein 27	4.91	4.91	12.18	12.18	12.18	3
P00359	Glyceraldehyde-3-phosphate dehydrogenase 3	26.71	26.71	68.67	58.73	53.92	19
P07280	40S ribosomal protein S19-A	17.9	17.9	63.89	56.94	56.94	12
P40540	ER membrane protein complex subunit 5	2	2	15.6	6.383	6.383	1
Q05022	rRNA biogenesis protein RRP5	10.57	10.57	15.5	5.61	5.147	7
P40825	Alanine--tRNA ligase, mitochondrial	23.07	23.07	24.92	16.99	15.87	12
P33442	40S ribosomal protein S1-A	4	29.59	58.04	56.47	53.73	16
P03965	Carbamoyl-phosphate synthase arginine-specific large chain	19.27	23.62	38.01	25.22	22.9	16
O14455	60S ribosomal protein L36-B	9.36	9.78	70	40	40	9
Q08492	Bud site selection protein 21	4	4	14.95	14.95	14.95	2
P41811	Coatomer subunit beta'	4.98	4.98	11.36	3.262	3.262	3
P11633	Non-histone chromosomal protein 6B	2.01	2.02	48.48	21.21	13.13	1
Q04458	Fatty aldehyde dehydrogenase HFD1	8.07	8.07	16.54	11.65	9.398	4
Q92331	Vacuolar protein sorting-associated protein 5	2	2	14.96	1.333	1.333	1
P12688	Serine/threonine-protein kinase YPK1	3.84	3.84	19.26	7.941	3.235	2
P28321	Monoglyceride lipase	13.51	13.51	24.6	21.41	21.41	7
P06169	Pyruvate decarboxylase isozyme 1	33.95	33.95	52.75	47.25	45.29	25
P22203	V-type proton ATPase subunit E	12	12	36.48	31.33	27.47	8
Q05518	Protein PAL1	3.97	4.01	39.68	5.01	5.01	2
P33322	H/ACA ribonucleoprotein complex subunit 4	16.59	16.59	45.13	31.26	26.09	8
Q00955	Acetyl-CoA carboxylase	61.33	61.33	36.18	24.36	20.56	34
P10664	60S ribosomal protein L4-A	2	45.2	63.54	62.71	62.71	36
P38631	1,3-beta-glucan synthase component FKS1	21.9	21.9	20.63	12.53	9.488	12
Q01590	Integral membrane protein SED5	2.57	2.57	16.76	8.235	8.235	2
P47120	Deoxyhypusine hydroxylase	3.43	3.43	26.46	9.538	9.538	2
Q02884	Elongator complex protein 4	3.5	3.5	8.553	3.947	3.947	2
P41805	60S ribosomal protein L10	25	25	58.82	58.37	51.58	13
Q3E754	40S ribosomal protein S21-B	2.03	2.03	62.07	21.84	10.34	1
P07251	ATP synthase subunit alpha, mitochondrial	17.87	17.87	26.79	23.12	23.12	10
P04456	60S ribosomal protein L25	12.57	12.62	47.18	42.96	42.96	15
P22137	Clathrin heavy chain	3.66	3.66	8.167	3.146	2.541	3
P38221	Phosphatidate cytidylyltransferase	4.07	4.07	10.28	7.44	5.033	2
P04449	60S ribosomal protein L24-A	6.69	6.69	30.97	30.97	26.45	5
Q05050	Eisosome protein 1	9.06	9.06	23.01	7.592	6.643	5
P17255	V-type proton ATPase catalytic subunit A	17.79	17.79	40.9	19.05	15.03	11
P39939	40S ribosomal protein S26-B	8	8	38.66	30.25	30.25	4
P39990	13 kDa ribonucleoprotein-associated protein	2.94	2.94	19.84	13.49	13.49	2
P06197	CDP-diacylglycerol--inositol 3-phosphatidyltransferase	5.6	5.6	26.82	15	15	4
Q03559	Uncharacterized protein YMR295C	4	4	31.98	27.92	27.92	2
P16140	V-type proton ATPase subunit B	16.09	16.09	36.56	25.53	25.53	9
P48589	40S ribosomal protein S12	7.89	7.89	43.36	30.07	30.07	4
P09064	Eukaryotic translation initiation factor 2 subunit beta	3.22	3.22	43.51	9.825	9.825	3
P09436	Isoleucine--tRNA ligase, cytoplasmic	5.33	5.33	12.31	7.276	4.944	4
P32352	C-8 sterol isomerase	4	4	13.06	13.06	13.06	2
P04840	Mitochondrial outer membrane protein porin 1	20.37	20.4	55.83	55.83	53	11
P19358	S-adenosylmethionine synthase 2	20.03	20.03	54.43	46.35	46.35	12
P0CX24	60S ribosomal protein L20-B	16.76	16.76	53.49	50	38.95	16
P43613	ER-localized J domain-containing protein 5	7.3	7.3	22.37	20.68	20.68	4
Q3E792	40S ribosomal protein S25-A	6.64	6.64	48.15	33.33	27.78	5
P38256	Uncharacterized protein YBR096W	3.77	3.77	24.35	13.48	13.48	3
P33298	26S protease regulatory subunit 6B homolog	6	8	32.71	14.95	14.95	5
Q00402	Nuclear migration protein NUM1	11.16	11.16	22.42	14.37	14.37	6
P0CX42	60S ribosomal protein L23-B	16.1	16.1	72.99	72.99	67.15	22
Q12213	60S ribosomal protein L7-B	31.18	31.18	52.87	52.87	52.87	25
P04912	Histone H2A.2	6	6	29.55	29.55	29.55	3
P19882	Heat shock protein 60, mitochondrial	6.86	6.86	13.81	11.19	8.916	4
P46672	GU4 nucleic-binding protein 1	4.46	4.46	18.35	14.1	11.44	3
P34167	Eukaryotic translation initiation factor 4B	28.52	28.52	50	43.35	43.35	15
P0CX83	60S ribosomal protein L19-B	13.05	13.05	39.15	29.63	29.63	12
P0CX36	40S ribosomal protein S4-B	25.21	25.21	62.84	51.72	44.44	19
P53299	Mitochondrial import inner membrane translocase subunit TIM13	4.17	4.17	78.1	49.52	32.38	3
P06634	ATP-dependent RNA helicase DED1	47.15	47.15	66.23	56.13	53.48	27
P40212	60S ribosomal protein L13-B	17.69	17.69	58.29	45.23	45.23	15
P0CX40	40S ribosomal protein S8-B	11.19	11.19	41	38	38	11
P46655	Glutamate--tRNA ligase, cytoplasmic	16.88	16.88	29.66	18.93	13.98	8
P29453	60S ribosomal protein L8-B	28.22	28.22	64.84	58.59	58.59	24
P41940	Mannose-1-phosphate guanyltransferase	5.45	5.45	19.39	11.91	11.91	5
P38764	26S proteasome regulatory subunit RPN1	10.09	10.09	10.98	8.258	7.553	6
P0CX50	60S ribosomal protein L18-B	8.68	8.68	30.65	25.27	22.04	6
P69771	Vacuolar protein-sorting-associated protein 46	3.13	3.13	25.98	16.18	12.25	2
P38249	Eukaryotic translation initiation factor 3 subunit A	8.3	8.3	19.4	8.299	6.846	4
P04801	Threonine--tRNA ligase, cytoplasmic	5.91	5.91	18.8	5.995	4.768	4
Q02892	Nucleolar GTP-binding protein 1	8.87	8.87	24.42	10.66	10.66	5
P04173	3-isopropylmalate dehydrogenase	31.7	31.7	56.59	52.75	52.75	17
P30605	Myo-inositol transporter 1	9.54	9.54	10.79	9.932	9.932	5
Q05359	Protein ERP1	5.47	5.47	23.74	18.26	18.26	3
P47154	CAAX prenyl protease 1	16.56	16.56	28.92	28.92	22.52	8
P05759	Ubiquitin-40S ribosomal protein S31	10.73	10.73	65.13	51.32	51.32	8
P00549	Pyruvate kinase 1	36.8	36.8	55.2	51.8	49	21
P53278	Uncharacterized protein YGR130C	17.05	17.05	23.04	14.46	11.4	8
P20606	Small COPII coat GTPase SAR1	10.66	10.66	60.53	42.63	35.79	6
P15891	Actin-binding protein	6.65	6.65	14.36	9.797	7.77	4
P0CX44	60S ribosomal protein L1-B	2.12	2.12	28.11	13.82	10.14	2
P19146	ADP-ribosylation factor 2	12.92	12.92	54.7	46.96	46.96	8
P38817	ADP-ribosylation factor-binding protein GGA2	3.66	3.66	15.38	10.6	7.863	3
P10592	Heat shock protein SSA2	6.09	45.33	56.65	45.07	43.97	27
P25294	Protein SIS1	17.07	17.07	36.65	36.36	30.68	8
P20424	Signal recognition particle subunit SRP54	4.05	4.05	11.28	6.1	4.806	2
P32319	Vacuolar protein sorting/targeting protein VPS10	3.78	3.78	10.45	2.787	2.407	3
P33892	Translational activator GCN1	11.02	11.02	12.09	3.668	3.368	7
P33750	Protein SOF1	4.41	4.49	19.22	10.63	7.157	3
P00815	Histidine biosynthesis trifunctional protein	24.23	24.23	34.04	29.79	24.91	14
P18414	ER lumen protein retaining receptor	4	4	10.96	10.96	10.96	2
P06774	Transcriptional activator HAP2	2	2	9.811	6.415	6.415	1
Q03529	Ceramide very long chain fatty acid hydroxylase SCS7	3.48	3.48	16.67	10.42	8.594	2
P24000	60S ribosomal protein L24-B	8.24	8.24	35.48	25.81	25.81	5
P11484	Heat shock protein SSB1	4	49.64	59.87	59.38	59.38	31
P41543	Dolichyl-diphosphooligosaccharide--protein glycosyltransferase subunit 1	8.33	8.33	18.28	18.28	14.71	4
P38993	Iron transport multicopper oxidase FET3	3.42	3.51	15.57	10.53	9.434	4
P46985	Probable alpha-1,6-mannosyltransferase MNN11	4.2	4.2	17.54	8.768	5.687	2
P40150	Heat shock protein SSB2	48.96	48.96	60.36	57.91	57.91	35
P39940	E3 ubiquitin-protein ligase RSP5	4.02	4.02	10.63	7.787	7.787	3
P22517	Calcium/calmodulin-dependent protein kinase II	8.25	8.25	16.33	11.19	8.725	4
P87262	60S ribosomal protein L34-A	4	4	20.66	20.66	20.66	2
P35179	Protein transport protein SSS1	3.64	3.64	22.5	22.5	22.5	2
P29547	Elongation factor 1-gamma 1	3.7	7.29	19.04	12.53	12.53	5
P38879	Nascent polypeptide-associated complex subunit alpha	2.21	2.21	31.61	20.11	4.023	1
P22803	Thioredoxin-2	10	10	66.35	54.81	54.81	5
P05748	60S ribosomal protein L15-A	14.98	14.98	50.98	36.76	36.76	11
P00330	Alcohol dehydrogenase 1	18.6	18.6	49.14	31.9	27.59	10
P31539	Heat shock protein 104	23	23	28.19	16.41	14.32	13
P38353	Sec sixty-one protein homolog	9.34	9.34	11.43	11.43	11.43	5
P32836	GTP-binding nuclear protein GSP2/CNR2	8.01	8.01	43.64	25.91	20.45	4
P14742	Glutamine--fructose-6-phosphate aminotransferase [isomerizing]	4.41	4.41	21.48	9.484	5.997	3
P00950	Phosphoglycerate mutase 1	16.34	16.34	40.89	40.89	40.89	10
P00360	Glyceraldehyde-3-phosphate dehydrogenase 1	8.28	15.49	49.4	41.87	33.73	11
P46971	Dolichyl-phosphate-mannose--protein mannosyltransferase 4	7.05	7.05	11.94	7.612	7.612	5
P40030	Ergosterol biosynthetic protein 28	2.95	2.95	17.57	13.51	13.51	2
Q05567	Sphingosine-1-phosphate lyase	6.42	6.42	16.81	12.39	8.319	3
P10127	Alcohol dehydrogenase 4	14.03	14.03	31.41	27.49	27.49	7
P0CX48	40S ribosomal protein S11-B	14.04	14.04	49.36	41.67	37.18	7
P53600	Coatomer subunit zeta	2	2	8.995	8.995	8.995	1
P0CX34	40S ribosomal protein S30-B	6	6	33.33	30.16	30.16	5
P32835	GTP-binding nuclear protein GSP1/CNR1	6	6	21.92	15.98	15.98	4
P53235	Eukaryotic translation initiation factor 2A	6	6	20.87	5.452	5.452	3
Q04869	Uncharacterized protein YMR315W	3.19	3.19	26.65	16.05	16.05	3
P14832	Peptidyl-prolyl cis-trans isomerase	12.2	12.2	59.26	46.3	41.98	8
P25491	Mitochondrial protein import protein MAS5	26.9	26.9	51.83	43.52	40.1	15
P18759	Vesicular-fusion protein SEC18	23.17	23.17	33.11	21.77	20.18	14
P26785	60S ribosomal protein L16-B	14.89	14.89	60.1	28.79	28.79	8
P04147	Polyadenylate-binding protein, cytoplasmic and nuclear	46.54	46.54	65.51	59.1	56.5	29
P0CX28	60S ribosomal protein L42-B	2	2	20.75	13.21	13.21	1
P53297	PAB1-binding protein 1	4	4	14.68	3.878	3.878	2
P27692	Transcription elongation factor SPT5	9.89	9.89	17.12	9.313	6.209	6
Q00055	Glycerol-3-phosphate dehydrogenase [NAD(+)] 1	4.08	4.08	16.88	11.51	9.463	2
P36016	Heat shock protein 70 homolog LHS1	6	6	12.15	4.086	4.086	3
P39010	Palmitoyltransferase AKR1	12.18	12.18	16.62	11.26	10.08	6
P29311	Protein BMH1	2.5	2.5	36.33	11.24	7.491	2
P53337	ER-derived vesicles protein ERV29	11.34	11.34	22.9	22.9	22.9	8
Q00684	Tyrosine-protein phosphatase CDC14	3.47	3.47	16.7	7.441	6.171	2
P40319	Elongation of fatty acids protein 3	4.05	4.05	15.36	5.217	5.217	2
P39705	Nucleoporin NUP60	5.01	5.01	25.05	7.421	6.308	3
P24276	Protein SSD1	14.76	14.76	26.88	12.24	8.96	7
Q99383	Nuclear polyadenylated RNA-binding protein 4	9.86	9.86	37.08	16.29	13.86	6
P40433	6-phosphofructo-2-kinase 1	5.83	5.83	13.66	7.618	4.111	3
P23301	Eukaryotic translation initiation factor 5A-1	2.35	2.35	21.02	15.92	15.92	2
P26784	60S ribosomal protein L16-A	7.14	12.77	36.68	25.63	25.63	7
P53633	Prenylated Rab acceptor 1	3.05	3.05	34.09	30.68	18.18	3
P38911	FK506-binding nuclear protein	2.92	2.92	22.63	16.79	16.79	3
P00560	Phosphoglycerate kinase	5.34	5.34	32.21	15.87	10.82	3
P17709	Glucokinase-1	3.3	3.3	15.6	7.8	5.6	2
Q03532	ATP-dependent RNA helicase HAS1	10.47	10.47	20.4	16.04	11.88	6
P10591	Heat shock protein SSA1	47.34	47.34	66.51	55.76	52.65	33
Q08972	[NU+] prion formation protein 1	5.28	7.54	21.15	7.609	4.431	5
P38250	Increased sodium tolerance protein 2	14.05	14.05	23.15	13.85	10.78	8
P41056	60S ribosomal protein L33-B	8.4	8.4	47.66	38.32	32.71	7
Q12305	Thiosulfate sulfurtransferase RDL1, mitochondrial	10.69	10.7	79.14	79.14	71.22	7
P34760	Peroxiredoxin TSA1	2.06	2.06	8.163	8.163	4.082	1
P00925	Enolase 2	35.3	35.3	64.07	55.15	52.63	18
P39076	T-complex protein 1 subunit beta	6.08	6.08	28.08	6.641	6.641	3
P00924	Enolase 1	11.41	33.8	55.38	51.95	50.57	17
P14906	Protein translocation protein SEC63	22.54	22.54	30.06	25.3	24.11	11
P09938	Ribonucleoside-diphosphate reductase small chain 1	4.34	4.34	32.83	7.268	5.764	2
Q03362	Uncharacterized protein YDR476C	5.68	5.68	28.13	25.45	19.2	3
P05744	60S ribosomal protein L33-A	2	8.4	47.66	38.32	32.71	5
P07560	Ras-related protein SEC4	12.01	16.16	52.56	46.98	46.98	9
P40358	DnaJ-like chaperone JEM1	3.75	3.75	11.94	5.736	3.721	2
P27809	Glycolipid 2-alpha-mannosyltransferase	4.66	6.75	13.57	11.76	11.76	5
P03872	Partitioning protein REP2	4.02	4.02	33.78	11.82	8.446	2
P53155	Uncharacterized protein YGL082W	6	6	25.2	8.924	8.924	3
P40989	1,3-beta-glucan synthase component GSC2	21.86	21.86	18.05	10.45	9.077	13
P41057	40S ribosomal protein S29-A	9.7	9.7	69.64	66.07	66.07	7
P31109	Synaptobrevin homolog 1	2	2	10.26	10.26	10.26	1
P25560	Protein RER1	5.59	5.59	29.79	29.79	19.15	3
P07245	C-1-tetrahydrofolate synthase, cytoplasmic	7.87	7.87	25.79	5.285	5.285	4
Q02159	Ubiquitin-conjugating enzyme E2 7	4	4	10.91	10.91	10.91	2
P33775	Dolichyl-phosphate-mannose--protein mannosyltransferase 1	13.04	13.04	21.18	12.73	12.73	7
P14127	40S ribosomal protein S17-B	15.11	15.11	54.41	54.41	53.68	12
P32803	Endosomal protein P24B	15.15	15.15	67	53.69	49.75	9
P17967	Protein disulfide-isomerase	28.39	28.39	44.44	41.19	39.46	18
Q99190	Very-long-chain enoyl-CoA reductase	2	2	2.581	2.581	2.581	1
Q06505	Transcription factor SPN1	8.04	8.04	31.46	13.17	13.17	4
P02994	Elongation factor 1-alpha	48.1	48.1	59.83	58.3	58.08	57
P25045	Serine palmitoyltransferase 1	16.6	16.6	30.82	28.85	28.85	10
P25367	[PIN+] prion protein R1	10	10	27.41	20.49	20.49	6
P32939	GTP-binding protein YPT7	10.7	10.7	51.44	51.44	46.15	6
P25303	DnaJ-related protein SCJ1	13.46	13.46	30.77	27.32	27.32	8
P32602	Alpha-soluble NSF attachment protein	17.66	17.66	63.01	47.26	44.86	10
P32582	Cystathionine beta-synthase	6.21	6.27	32.94	14.4	10.26	3
P80210	Adenylosuccinate synthetase	4.7	4.7	11.55	10.16	10.16	3
P38286	Very-long-chain 3-oxoacyl-CoA reductase	10.37	10.37	25.94	25.07	25.07	7
Q08745	40S ribosomal protein S10-A	5.2	5.2	46.67	36.19	36.19	3
P05453	Eukaryotic peptide chain release factor GTP-binding subunit	15.92	15.92	27.15	21.46	18.98	11
Q01560	Nucleolar protein 3	12	12	31.88	21.74	21.74	6
P38130	Probable mannosyltransferase KTR3	9.9	9.9	32.43	13.37	13.37	6
Q12154	ATPase GET3	6.04	6.04	24.29	18.93	10.73	3
P38694	Putative aldehyde dehydrogenase-like protein YHR039C	8.01	8.01	12.58	9.472	7.919	4
P35191	DnaJ homolog 1, mitochondrial	3.82	3.82	13.31	6.458	6.458	2
P32621	Guanosine-diphosphatase	5.18	5.18	12.55	11.58	11.58	4
P37291	Serine hydroxymethyltransferase, cytosolic	9.34	9.34	42.43	22.39	15.78	6
Q04279	Uncharacterized protein YMR086W	4.74	4.74	15.31	4.062	3.333	3
P40024	ABC transporter ATP-binding protein ARB1	13.67	13.67	29.84	16.72	14.92	8
P14540	Fructose-bisphosphate aldolase	21.95	21.95	51.81	50.14	46.8	19
P38626	NADH-cytochrome b5 reductase 1	16.55	16.55	65.14	47.89	47.89	9
P05317	60S acidic ribosomal protein P0	20.39	20.4	40.38	38.46	33.97	11
P05743	60S ribosomal protein L26-A	20.28	20.28	54.33	54.33	49.61	14
P60010	Actin	17.06	17.06	38.93	33.87	33.87	10
P10659	S-adenosylmethionine synthase 1	8	22.13	47.12	47.12	44.24	12
P38295	Medium-chain fatty acid ethyl ester synthase/esterase 2	18.33	18.33	39.47	30.38	28.38	10
P31412	V-type proton ATPase subunit C	5.28	5.28	17.86	13.52	9.184	3
P39986	Probable cation-transporting ATPase 1	37.71	37.71	32.67	26.5	24.36	21
P47079	T-complex protein 1 subunit theta	10.83	10.83	20.95	15.67	15.67	7
P05375	Phosphatidyl-N-methylethanolamine N-methyltransferase	4	4	26.21	11.65	11.65	2
P16474	78 kDa glucose-regulated protein homolog	51.12	51.12	43.4	42.08	40.76	28
P52871	Protein transport protein SBH2	2	2	14.77	14.77	14.77	1
P32588	Nuclear and cytoplasmic polyadenylated RNA-binding protein PUB1	8	8	24.94	11.04	11.04	4
Q06179	Protein FMP27, mitochondrial	8.19	8.19	14.76	1.865	1.865	5
Q12207	Non-classical export protein 2	3.96	4	7.514	7.514	7.514	2
P25694	Cell division control protein 48	6.03	6.05	17.13	8.982	5.269	4
P19073	Cell division control protein 42	8	8	25.65	25.65	25.65	4
P36095	Vacuolar protein-sorting-associated protein 24	6.44	6.44	17.86	17.86	14.29	4
P33328	Synaptobrevin homolog 2	2	2	10.43	10.43	10.43	2
P05739	60S ribosomal protein L6-B	5.04	19.84	59.09	57.95	57.95	12
P33767	Dolichyl-diphosphooligosaccharide--protein glycosyltransferase subunit WBP1	16.17	16.17	36.98	34.65	32.56	9
P16861	6-phosphofructokinase subunit alpha	23.84	23.84	30.19	18.74	17.22	13
P10080	Single-stranded nucleic acid-binding protein	18.45	18.45	63.27	45.58	45.58	17
P39968	Vacuolar protein 8	5.62	5.62	14.36	5.363	5.363	3
Q3E7X9	40S ribosomal protein S28-A	3.76	3.76	47.76	41.79	31.34	3
P36081	Uncharacterized protein YKL077W	5.37	5.37	10.2	6.378	6.378	3
P38199	Heterogeneous nuclear rnp K-like protein 2	4.33	4.33	12.86	9.186	5.512	3
P19955	37S ribosomal protein YMR-31, mitochondrial	6.13	6.13	54.47	47.15	30.89	3
P32324	Elongation factor 2	20.23	20.23	34.44	24.47	22.21	13
P31382	Dolichyl-phosphate-mannose--protein mannosyltransferase 2	11.78	11.78	24.37	14.49	13.31	6
P13586	Calcium-transporting ATPase 1	10.87	10.87	19.37	11.26	9.368	6
P05749	60S ribosomal protein L22-A	7.22	7.22	66.94	61.16	61.16	5
P05319	60S acidic ribosomal protein P2-alpha	8	8	52.83	52.83	52.83	5
P22146	1,3-beta-glucanosyltransferase GAS1	6.23	6.23	18.07	13.6	13.6	5
P32804	Zinc-regulated transporter 1	3.73	3.74	12.77	12.77	12.77	4
P17695	Glutaredoxin-2, mitochondrial	10.21	11.58	45.45	40.56	33.57	6
P28274	CTP synthase 1	4.02	4.03	15.72	4.145	4.145	2
Q12464	RuvB-like protein 2	2.23	2.23	25.05	7.431	2.548	1
P53012	FIT family protein SCS3	3.96	3.96	6.579	4.474	4.474	2
P21375	Osmotic growth protein 1	4.22	4.22	13.17	7.784	6.188	2
P32791	Ferric/cupric reductase transmembrane component 1	4	4	15.01	4.227	3.207	2
Q12250	26S proteasome regulatory subunit RPN5	4.37	4.4	25.17	13.71	8.989	3
P53108	Protein YIP5	2	2	12.9	3.548	3.548	1
P40557	ER-retained PMA1-suppressing protein 1	3.52	3.52	14.12	4.565	4.565	3
Q04969	Signal peptidase complex subunit SPC2	5.2	5.2	22.47	17.42	17.42	3
P53691	Peptidyl-prolyl cis-trans isomerase CPR6	4.39	4.39	20.75	14.02	7.817	2
P38627	CTP synthase 2	2	2	8.824	1.384	1.384	1
P39676	Flavohemoprotein	4	4	13.78	9.524	9.524	2
P39730	Eukaryotic translation initiation factor 5B	4.1	4.1	13.37	3.792	3.094	2
P36421	Tyrosine--tRNA ligase, cytoplasmic	4.21	4.21	23.6	8.883	4.822	2
Q07478	ATP-dependent RNA helicase SUB2	3.22	3.22	16.14	7.175	4.933	2

## Sheet: 3_peptides
Table S1-3. Peptide identification results for 845 proteins with TU:TO ratios
Protein Uniprot accession	Protein description	Peptide sequence	Contribution	Confidence (%)	Modifications	Cleavages	dMass	Measured MW	Measured m/z	Theoretical MW	Theoretical m/z	Charge state
Q01590	Integral membrane protein SED5	ASGIAHEISSTAQLLSK	2	99	Dimethyl@N-term; Dimethyl(K)@17		0.0019386	1767.97	590.332	1767.97	590.332	3
Q01590	Integral membrane protein SED5	TSEFQQSVLSYK	2	99	Dimethyl@N-term; Dimethyl(K)@12		-0.0039441	1471.75	736.883	1471.76	736.885	2
Q01590	Integral membrane protein SED5	NVVNLLNTQMK	0	45	Dimethyl@N-term; Dimethyl(K)@11		-0.00245857	1328.75	665.38	1328.75	665.382	2
P25367	[PIN+] prion protein RNQ1	IAGYVMDNR	0	99	Dimethyl:2H(4)@N-term		0.00207343	1069.55	535.785	1069.55	535.784	2
P25367	[PIN+] prion protein RNQ1	IAGYVMDNR	0	48	Dimethyl:2H(4)@N-term		0.00207343	1069.55	535.785	1069.55	535.784	2
P25367	[PIN+] prion protein RNQ1	IAGYVMDNR	0	20	Dimethyl:2H(4)@N-term		0.00207343	1069.55	535.785	1069.55	535.784	2
P25367	[PIN+] prion protein RNQ1	LTSAAQSNPNDEQMSTIESLIQK	0	99	Dimethyl:2H(4)@N-term; Deamidated(N)@10; Dimethyl:2H(4)(K)@23		0.0185604	2569.32	857.448	2569.3	857.442	3
P25367	[PIN+] prion protein RNQ1	AAGGGSSFMNTLMADSK	0	99	Dimethyl:2H(4)@N-term; Dimethyl:2H(4)(K)@17		0.00251563	1707.84	570.288	1707.84	570.288	3
P25367	[PIN+] prion protein RNQ1	AAGGGSSFMNTLMADSK	0	99	Dimethyl:2H(4)@N-term; Dimethyl:2H(4)(K)@17		0.00251563	1707.84	570.288	1707.84	570.288	3
P25367	[PIN+] prion protein RNQ1	AAGGGSSFMNTLMADSK	0	99	Dimethyl:2H(4)@N-term; Dimethyl:2H(4)(K)@17		0.00251563	1707.84	570.288	1707.84	570.288	3
P25367	[PIN+] prion protein RNQ1	LTSAAQSNPNDEQMSTIESLIQK	0	99	Dimethyl:2H(4)@N-term; Dimethyl:2H(4)(K)@23		-0.00448232	2568.31	857.112	2568.32	857.114	3
P25367	[PIN+] prion protein RNQ1	LTSAAQSNPNDEQMSTIESLIQK	0	99	Dimethyl:2H(4)@N-term; Dimethyl:2H(4)(K)@23		-0.00448232	2568.31	857.112	2568.32	857.114	3
P25367	[PIN+] prion protein RNQ1	LTSAAQSNPNDEQMSTIESLIQK	0	99	Dimethyl:2H(4)@N-term; Dimethyl:2H(4)(K)@23		-0.00638427	2568.31	643.086	2568.32	643.087	4
P25367	[PIN+] prion protein RNQ1	LTSAAQSNPNDEQMSTIESLIQK	0	99	Dimethyl:2H(4)@N-term; Dimethyl:2H(4)(K)@23		-0.00448232	2568.31	857.112	2568.32	857.114	3
P25367	[PIN+] prion protein RNQ1	IAGYVMDNR	2	99	Dimethyl@N-term		0.00193781	1065.53	533.772	1065.53	533.771	2
P25367	[PIN+] prion protein RNQ1	AAGGGSSFMNTLMADSK	2	99	Dimethyl@N-term; Dimethyl(K)@17		-0.985888	1698.81	850.41	1699.79	850.903	2
P25367	[PIN+] prion protein RNQ1	AAGGGSSFMNTLMADSK	0	99	Dimethyl@N-term; Dimethyl(K)@17		0.00249986	1699.79	850.904	1699.79	850.903	2
P25367	[PIN+] prion protein RNQ1	AAGGGSSFMNTLMADSK	0	99	Dimethyl@N-term; Dimethyl(K)@17		0.00115138	1699.79	567.605	1699.79	567.604	3
P25367	[PIN+] prion protein RNQ1	AAGGGSSFMNTLMADSK	0	99	Dimethyl@N-term; Dimethyl(K)@17		0.00249986	1699.79	850.904	1699.79	850.903	2
P25367	[PIN+] prion protein RNQ1	AAGGGSSFMNTLMADSK	0	99	Dimethyl@N-term; Dimethyl(K)@17		0.00115138	1699.79	567.605	1699.79	567.604	3
P25367	[PIN+] prion protein RNQ1	LISEAESHFSQGNHAEAVAK	2	99	Dimethyl@N-term; Dimethyl(K)@20		0.00257838	2180.09	546.029	2180.09	546.029	4
P25367	[PIN+] prion protein RNQ1	LISEAESHFSQGNHAEAVAK	0	24	Dimethyl@N-term; Dimethyl(K)@20		0.00257838	2180.09	546.029	2180.09	546.029	4
P25367	[PIN+] prion protein RNQ1	LTSAAQSNPNDEQMSTIESLIQK	0	99	Dimethyl@N-term; Dimethyl(K)@23		-0.00157969	2560.27	854.43	2560.27	854.43	3
P25367	[PIN+] prion protein RNQ1	LTSAAQSNPNDEQMSTIESLIQK	0	99	Dimethyl@N-term; Dimethyl(K)@23		-0.00312741	2560.27	641.074	2560.27	641.075	4
P25367	[PIN+] prion protein RNQ1	LTSAAQSNPNDEQMSTIESLIQK	0	99	Dimethyl@N-term; Dimethyl(K)@23		-0.00312741	2560.27	641.074	2560.27	641.075	4
P25367	[PIN+] prion protein RNQ1	LTSAAQSNPNDEQMSTIESLIQK	0	99	Dimethyl@N-term; Dimethyl(K)@23		-0.00157969	2560.27	854.43	2560.27	854.43	3
P25367	[PIN+] prion protein RNQ1	AAGGGSSFMNTLMADSK	0	99	Dimethyl@N-term; Oxidation(M)@13; Dimethyl(K)@17		0.0160259	1715.8	572.941	1715.79	572.936	3
P25367	[PIN+] prion protein RNQ1	LTSAAQSNPNDEQMSTIESLIQK	2	99	Dimethyl@N-term; Pro->pyro-Glu(P)@9; Deamidated(N)@10; Dimethyl(K)@23		0.0326845	2575.27	859.429	2575.23	859.418	3
P00445	Superoxide dismutase [Cu-Zn]	FEQASESEPTTVSYEIAGNSPNAER	2	99	Dimethyl:2H(4)@N-term		0.0121963	2744.28	915.769	2744.27	915.764	3
P00445	Superoxide dismutase [Cu-Zn]	LIGPTSVVGR	2	99	Dimethyl:2H(4)@N-term		-0.00517921	1029.64	515.829	1029.65	515.831	2
P00445	Superoxide dismutase [Cu-Zn]	TGNAGPRPACGVIGLTN	2	99	Dimethyl:2H(4)@N-term; Carbamidomethyl(C)@10		0.00114543	1685.88	843.949	1685.88	843.948	2
P00445	Superoxide dismutase [Cu-Zn]	GSFKDSLIK	0	61	Dimethyl:2H(4)@N-term; Dimethyl:2H(4)(K)@4; Dimethyl:2H(4)(K)@9	missed K-D@4	0.00197365	1089.72	364.248	1089.72	364.247	3
P00445	Superoxide dismutase [Cu-Zn]	HVGDMGNVKTDENGVAK	2	99	Dimethyl:2H(4)@N-term; Dimethyl:2H(4)(K)@9; Deamidated(N)@13; Dimethyl:2H(4)(K)@17	missed K-T@9	-0.0559637	1866.93	467.741	1866.99	467.755	4
P38737	Proteasome component ECM29	EPNLAAQQDSTNVR	1	99	Dimethyl:2H(6)13C(2)@N-term; Deamidated(Q)@8		0.028307	1578.83	527.284	1578.8	527.275	3														95.35	36.15	199.48	52.07
P38737	Proteasome component ECM29	GMAATQTIEQSPR	2	99	Dimethyl:2H(6)13C(2)@N-term		0.00810353	1424.76	713.385	1424.75	713.381	2														90.33	42.04	287.51	76.82
P38737	Proteasome component ECM29	QVQVSQQPLSR	1	97	Dimethyl:2H(6)13C(2)@N-term		0.00511954	1304.76	653.389	1304.76	653.387	2														0	0	170.1	51.97
P38737	Proteasome component ECM29	LLGSESDDSEGSIK	0	33	Dimethyl@N-term; Dimethyl(K)@14		0.00260981	1491.73	746.874	1491.73	746.872	2														23.9	32.78	194.43	78.49
P38737	Proteasome component ECM29	ALIVQAK	0	25	Dimethyl@N-term; Dimethyl(K)@7		0.000909527	797.538	399.776	797.537	399.776	2														98.74	82.67	750.27	223.83
P38737	Proteasome component ECM29	LIDLVK	0	72	Dimethyl@N-term; Dimethyl(K)@6	cleaved T-L@N-term	0.000575531	755.516	378.765	755.516	378.765	2														0	0	121.72	126.03
P38737	Proteasome component ECM29	EPNLAAQQDSTNVR	0	99	Dimethyl@N-term		0.00117731	1569.78	524.266	1569.77	524.266	3														0	0	190.07	54.29
P38737	Proteasome component ECM29	ALELDDTVVSR	0	17	Dimethyl@N-term		-0.00292404	1244.66	623.336	1244.66	623.338	2														29.55	63.42	834.6	238.88
P38737	Proteasome component ECM29	ETIENVK	0	81	Dimethyl@N-term; Deamidated(N)@5; Dimethyl(K)@7		-0.0087091	888.472	445.243	888.48	445.247	2														10.35	24.43	0	0
P38737	Proteasome component ECM29	ETIENVK	0	79	Dimethyl@N-term; Deamidated(N)@5; Dimethyl(K)@7		-0.0087091	888.472	445.243	888.48	445.247	2														0	0	0	0
P07991	Ornithine aminotransferase	LAPPLVISEEDLQTGVETIAK	2	99	Dimethyl:2H(6)13C(2)@N-term; Dimethyl:2H(6)13C(2)(K)@21		0.00206227	2294.36	765.793	2294.36	765.793	3														0	0	436.68	95.96
P07991	Ornithine aminotransferase	AEAKPDIVLLGK	0	88	Dimethyl@N-term; Dimethyl(K)@4; Dimethyl(K)@12		0.00117429	1336.83	446.619	1336.83	446.618	3														0	0	639.94	166.71
P07991	Ornithine aminotransferase	ALTEQAQTLTLSSR	2	99	Dimethyl@N-term		-0.00173231	1545.83	773.924	1545.84	773.925	2														0	0	346.48	223.38
P07991	Ornithine aminotransferase	LAPPLVISEEDLQTGVETIAK	0	99	Dimethyl@N-term; Dimethyl(K)@21		-0.00334071	2278.26	760.428	2278.27	760.43	3														0	0	422.14	94.45
P07991	Ornithine aminotransferase	YGHAEDFVPILESPEGK	0	99	Dimethyl@N-term; Dimethyl(K)@17		-0.992149	1941.98	648.332	1942.97	648.663	3														156	101.71	329.85	142.77
Q03860	Golgi apparatus membrane protein TVP15	APGSSLSIGDDDIDDDDDMI	2	99	Dimethyl@N-term		0.000478867	2092.86	1047.44	2092.86	1047.44	2														0	0	636.09	171
Q03860	Golgi apparatus membrane protein TVP15	APGSSLSIGDDDIDDDDDMI	0	98	Dimethyl@N-term		0.000478867	2092.86	1047.44	2092.86	1047.44	2														0	0	636.09	170.99
P05749	60S ribosomal protein L22-A	TFTVDVSSPTENGVFDPASYAK	0	99	Dimethyl@N-term; Deamidated(N)@12; Dimethyl(K)@22		0.00604998	2388.14	1195.08	2388.14	1195.08	2														0	0	740.44	182.78
P05749	60S ribosomal protein L22-A	TFTVDVSSPTENGVFDPASYAK	0	99	Dimethyl@N-term; Deamidated(N)@12; Dimethyl(K)@22		0.00604998	2388.14	1195.08	2388.14	1195.08	2														0	0	740.44	182.78
P05749	60S ribosomal protein L22-A	LAFYQVTPEEDEEEDEE	0	98	Dimethyl@N-term		0.0024545	2098.88	1050.45	2098.87	1050.44	2														0	0	1409.73	265
P05749	60S ribosomal protein L22-A	TFTVDVSSPTENGVFDPASYAK	0	19	Dimethyl:2H(6)13C(2)@N-term; Dimethyl:2H(6)13C(2)(K)@22		0.00184068	2403.24	802.089	2403.24	802.088	3														0	0	287.67	106.76
P05749	60S ribosomal protein L22-A	VEGAVGNLGNAVTVTEDGTVVTVVSTAK	2	99	Dimethyl:2H(6)13C(2)@N-term; Dimethyl:2H(6)13C(2)(K)@28		0.00164017	2758.56	920.526	2758.55	920.525	3														0	0	704.74	169.18
P05749	60S ribosomal protein L22-A	LAFYQVTPEEDEEEDEE	2	99	Dimethyl:2H(6)13C(2)@N-term		0.00110971	2106.92	1054.47	2106.92	1054.47	2														0	0	1409.73	265
P05749	60S ribosomal protein L22-A	VEGAVGNLGNAVTVTEDGTVVTVVSTAK	0	99	Dimethyl@N-term; Dimethyl(K)@28		0.000608168	2742.47	915.163	2742.47	915.162	3														0	0	704.74	169.18
P05749	60S ribosomal protein L22-A	TFTVDVSSPTENGVFDPASYAK	2	99	Dimethyl:2H(6)13C(2)@N-term; Deamidated(N)@12; Dimethyl:2H(6)13C(2)(K)@22		0.000435717	2404.23	1203.12	2404.23	1203.12	2														0	0	762.11	185.38
P05749	60S ribosomal protein L22-A	TFTVDVSSPTENGVFDPASYAK	0	99	Dimethyl@N-term; Dimethyl(K)@22		-0.000835496	2387.15	796.725	2387.15	796.725	3														0	0	260.51	101.78
P05749	60S ribosomal protein L22-A	TFTVDVSSPTENGVFDPASYAK	0	99	Dimethyl:2H(6)13C(2)@N-term; Deamidated(N)@12; Dimethyl:2H(6)13C(2)(K)@22		-0.0122587	2404.21	802.412	2404.23	802.416	3														207.23	102.84	1167.21	239.41
P05749	60S ribosomal protein L22-A	TFTVDVSSPTENGVFDPASYAK	0	93	Dimethyl:2H(6)13C(2)@N-term; Deamidated(N)@12; Dimethyl:2H(6)13C(2)(K)@22		-0.0122587	2404.21	802.412	2404.23	802.416	3														207.23	102.84	1167.21	239.43
Q99385	Vacuolar calcium ion transporter	AAVYDLQYILK	2	99	Dimethyl@N-term; Dimethyl(K)@11		0.000987774	1351.78	676.895	1351.78	676.895	2
Q99385	Vacuolar calcium ion transporter	MDATTPLLTVANSHPAR	2	99	Dimethyl@N-term		-0.00363783	1821.94	608.32	1821.94	608.321	3
Q99385	Vacuolar calcium ion transporter	AAVYDLQYILK	0	99	Dimethyl:2H(4)@N-term; Dimethyl:2H(4)(K)@11		-0.00217852	1359.82	680.919	1359.83	680.92	2
Q99385	Vacuolar calcium ion transporter	AAVYDLQYILK	0	99	Dimethyl:2H(4)@N-term; Dimethyl:2H(4)(K)@11		-0.00193438	1359.82	680.919	1359.83	680.92	2
Q99385	Vacuolar calcium ion transporter	AAVYDLQYILK	0	99	Dimethyl@N-term; Dimethyl(K)@11		0.00110984	1351.78	676.895	1351.78	676.895	2
Q99385	Vacuolar calcium ion transporter	AAVYDLQYILK	0	99	Dimethyl:2H(4)@N-term; Dimethyl:2H(4)(K)@11		-0.00193438	1359.82	680.919	1359.83	680.92	2
Q99385	Vacuolar calcium ion transporter	AAVYDLQYILK	0	99	Dimethyl@N-term; Dimethyl(K)@11		0.00110984	1351.78	676.895	1351.78	676.895	2
Q99385	Vacuolar calcium ion transporter	AAVYDLQYILK	0	99	Dimethyl:2H(4)@N-term; Dimethyl:2H(4)(K)@11		-0.00193438	1359.82	680.919	1359.83	680.92	2
Q99385	Vacuolar calcium ion transporter	AAVYDLQYILK	0	98	Dimethyl@N-term; Dimethyl(K)@11		-0.00243016	1351.77	676.894	1351.78	676.895	2
Q99385	Vacuolar calcium ion transporter	MDATTPLLTVANSHPAR	0	99	Dimethyl@N-term; Deamidated(N)@12		-0.0067657	1822.92	608.647	1822.92	608.649	3
Q99385	Vacuolar calcium ion transporter	MDATTPLLTVANSHPAR	0	99	Dimethyl:2H(4)@N-term		-0.00613482	1825.96	609.66	1825.97	609.663	3
Q99385	Vacuolar calcium ion transporter	MDATTPLLTVANSHPAR	0	99	Dimethyl@N-term; Dioxidation(M)@1; Dehydrated(D)@2; Deamidated(N)@12		-0.00663942	1836.9	919.456	1836.9	919.459	2
Q99385	Vacuolar calcium ion transporter	MDATTPLLTVANSHPAR	0	99	Dimethyl@N-term; Dioxidation(M)@1; Dehydrated(D)@2; Deamidated(N)@12		-0.00663942	1836.9	919.456	1836.9	919.459	2
Q99385	Vacuolar calcium ion transporter	MDATTPLLTVANSHPAR	0	99	Dimethyl@N-term; Dioxidation(M)@1; Dehydrated(D)@2		-0.00136061	1835.92	612.98	1835.92	612.981	3
Q99385	Vacuolar calcium ion transporter	MDATTPLLTVANSHPAR	0	99	Carbamyl@N-term		0.00148931	1836.92	613.313	1836.92	613.312	3
Q99385	Vacuolar calcium ion transporter	MDATTPLLTVANSHPAR	0	99	Dimethyl@N-term; Dioxidation(M)@1; Dehydrated(D)@2		0.00424185	1835.92	918.969	1835.92	918.967	2
Q99385	Vacuolar calcium ion transporter	MDATTPLLTVANSHPAR	0	99	Dimethyl@N-term; Dioxidation(M)@1; Dehydrated(D)@2		-0.00136061	1835.92	612.98	1835.92	612.981	3
Q99385	Vacuolar calcium ion transporter	MDATTPLLTVANSHPAR	0	99	Dimethyl@N-term		-0.00272231	1821.94	608.32	1821.94	608.321	3
P53093	Protein YIP4	GTLDETVLQTLK	2	99	Dimethyl:2H(4)@N-term; Dimethyl:2H(4)(K)@12		-0.00200881	1380.83	691.422	1380.83	691.423	2
P53093	Protein YIP4	DVVEINSR	1	97	Dimethyl@N-term		0.0110592	958.519	480.267	958.508	480.261	2
P53093	Protein YIP4	DVVEINSR	0	90	Dimethyl@N-term		0.0118527	958.52	480.267	958.508	480.261	2
P53093	Protein YIP4	DVVEINSR	0	78	Dimethyl:2H(4)@N-term		0.0226909	962.556	482.285	962.533	482.274	2
P09620	Pheromone-processing carboxypeptidase KEX1	GVLDTIDNLK	2	99	Dimethyl:2H(6)13C(2)@N-term; Dimethyl:2H(6)13C(2)(K)@10		1.00729	1159.75	580.883	1158.74	580.379	2														0	0	283.88	122.76
P09620	Pheromone-processing carboxypeptidase KEX1	GTADCLNMYNFNLK	0	98	Dimethyl@N-term; Carbamidomethyl(C)@5; Dimethyl(K)@14		0.0465752	1715.85	858.931	1715.8	858.908	2														51.46	57.7	352.86	139.16
P09620	Pheromone-processing carboxypeptidase KEX1	GVLDTIDNLK	0	99	Dimethyl:2H(6)13C(2)@N-term; Dimethyl:2H(6)13C(2)(K)@10		-0.000397233	1158.74	580.379	1158.74	580.379	2														0	0	857.51	212.48
P09620	Pheromone-processing carboxypeptidase KEX1	NKFDEDLEDVTK	1	99	Dimethyl@N-term; Dimethyl(K)@2; Dimethyl(K)@12	missed K-F@2	-0.00099647	1535.77	512.931	1535.77	512.931	3														0	0	943.01	269.87
P09620	Pheromone-processing carboxypeptidase KEX1	IFPEDLTR	0	89	Dimethyl:2H(6)13C(2)@N-term		-0.00257415	1025.59	513.803	1025.59	513.804	2														492.56	178.6	1046.17	254.04
P09620	Pheromone-processing carboxypeptidase KEX1	DISFVSK	0	42	Dimethyl@N-term; Dimethyl(K)@7		-0.00231118	850.478	426.246	850.48	426.247	2														336.56	147.48	236.89	146.29
P09620	Pheromone-processing carboxypeptidase KEX1	GVLDTIDNLK	0	99	Dimethyl@N-term; Dimethyl(K)@10		-0.0162814	1142.64	572.327	1142.65	572.335	2														0	0	857.51	212.53
P09064	Eukaryotic translation initiation factor 2 subunit beta	TGFQATVGK	2	99	Dimethyl:2H(4)@N-term; Dimethyl:2H(4)(K)@9		-0.0105335	971.579	486.797	971.589	486.802	2
P09064	Eukaryotic translation initiation factor 2 subunit beta	DSSVDAFEK	2	99	Dimethyl:2H(4)@N-term; Dimethyl:2H(4)(K)@9		0.00289997	1060.56	531.285	1060.55	531.284	2
P09064	Eukaryotic translation initiation factor 2 subunit beta	TNNPELAGDR	1	99	Dimethyl:2H(4)@N-term		0.000634777	1117.57	559.791	1117.57	559.791	2
P09064	Eukaryotic translation initiation factor 2 subunit beta	FFNILR	0	56	Dimethyl:2H(4)@N-term		0.00331218	840.519	421.267	840.516	421.265	2
P09064	Eukaryotic translation initiation factor 2 subunit beta	SINTELK	0	30	Dimethyl:2H(4)@N-term; Deamidated(N)@3; Dimethyl:2H(4)(K)@7		0.00236611	868.538	435.276	868.536	435.275	2
P09064	Eukaryotic translation initiation factor 2 subunit beta	SVSSIKT	0	68	Dimethyl:2H(4)@N-term; Dimethyl:2H(4)(K)@6	cleaved T-G@C-term; missed K-T@6	0.0168708	784.531	393.273	784.515	393.265	2
P53163	54S ribosomal protein L12, mitochondrial	IVQDISQLTLLETSSLINELK	0	99	Dimethyl:2H(6)13C(2)@N-term; Dimethyl:2H(6)13C(2)(K)@21		0.00628492	2428.47	810.496	2428.46	810.494	3														0	0	194.05	41.85
P53163	54S ribosomal protein L12, mitochondrial	IVQDISQLTLLETSSLINELK	2	99	Dimethyl@N-term; Dimethyl(K)@21		0.00326078	2412.38	805.133	2412.37	805.132	3														0	0	173.19	39.81
P53163	54S ribosomal protein L12, mitochondrial	GLLGLSLVEAK	0	99	Dimethyl:2H(6)13C(2)@N-term; Dimethyl:2H(6)13C(2)(K)@11		0.000401989	1170.82	586.416	1170.82	586.415	2														0	0	509.12	131.41
P53163	54S ribosomal protein L12, mitochondrial	GLLGLSLVEAK	2	99	Dimethyl@N-term; Dimethyl(K)@11		-0.00287907	1154.72	578.37	1154.73	578.371	2														0	0	509.12	131.39
P53163	54S ribosomal protein L12, mitochondrial	GLLGLSLVEAK	0	99	Dimethyl@N-term; Dimethyl(K)@11		-0.00287907	1154.72	578.37	1154.73	578.371	2														0	0	509.12	131.41
P53163	54S ribosomal protein L12, mitochondrial	TVFTVK	0	35	Dimethyl@N-term; Dimethyl(K)@6		-0.00389369	749.465	375.74	749.469	375.742	2														1006.93	252.6	178.41	93.8
P00359	Glyceraldehyde-3-phosphate dehydrogenase 3	VAINGFGR	0	21	Dimethyl:2H(4)@N-term; Deamidated(N)@4		0.00129395	865.497	433.756	865.496	433.755	2														1141.82	518.58	202.67
P00359	Glyceraldehyde-3-phosphate dehydrogenase 3	VINDAFGIEEGLM	0	33	Dimethyl:2H(4)@N-term	cleaved M-T@C-term	-0.00587548	1438.73	720.37	1438.73	720.373	2														158.07	182.65	98.53
P00359	Glyceraldehyde-3-phosphate dehydrogenase 3	IALSRPNVEVVALNDPFITNDYAAYMFK	0	34	Dimethyl:2H(4)@N-term; Dimethyl:2H(4)(K)@28		-0.000386123	3234.72	809.688	3234.72	809.688	4														270.07	0	0
P00359	Glyceraldehyde-3-phosphate dehydrogenase 3	VVITAPSSTAPMFVMGVNEEK	0	38	Dimethyl:2H(6)13C(2)@N-term; Dimethyl:2H(6)13C(2)(K)@21		-0.0127288	2278.24	760.421	2278.25	760.425	3														1377.32	623.09	196.36
P00359	Glyceraldehyde-3-phosphate dehydrogenase 3	CLAPLAK	0	41	Dimethyl:2H(4)@N-term; Carbamidomethyl(C)@1; Dimethyl:2H(4)(K)@7	cleaved N-C@N-term	0.00263742	835.547	418.781	835.544	418.779	2														1393.18	322.89	122.42
P00359	Glyceraldehyde-3-phosphate dehydrogenase 3	CLAPLAK	0	44	Dimethyl:2H(4)@N-term; Carbamidomethyl(C)@1; Dimethyl:2H(4)(K)@7	cleaved N-C@N-term	0.0168587	835.561	418.788	835.544	418.779	2														319.64	228.04	145.72
P00359	Glyceraldehyde-3-phosphate dehydrogenase 3	VLPELQGK	0	54	Dimethyl@N-term; Dimethyl(K)@8		-0.000959775	938.579	470.297	938.58	470.297	2														5114.96	1035.08	417.4
P00359	Glyceraldehyde-3-phosphate dehydrogenase 3	TTYDEIKK	0	55	No Dimethyl@N-term; Dimethyl:2H(4)(K)@7; Dimethyl:2H(4)(K)@8	cleaved E-T@N-term; missed K-K@7	-0.00226039	1060.62	531.319	1060.63	531.32	2														228.38	72.18	61.44
P00359	Glyceraldehyde-3-phosphate dehydrogenase 3	KVVITAPSSTAPMFVMGVNEEK	0	57	Dimethyl:2H(4)@N-term; Dimethyl:2H(4)(K)@1; Deamidated(N)@19; Dimethyl:2H(4)(K)@22	missed K-V@1	0.0157814	2431.37	811.462	2431.35	811.457	3														538.06	0	0
P00359	Glyceraldehyde-3-phosphate dehydrogenase 3	ETTYDEIKK	0	57	Dimethyl:2H(4)@N-term; Didehydro(T)@2; Dimethyl:2H(4)(K)@8; Dimethyl:2H(4)(K)@9	missed K-K@8	-0.00279859	1219.71	610.86	1219.71	610.862	2														372.09	83.63	63.2
P00359	Glyceraldehyde-3-phosphate dehydrogenase 3	VLPELQGK	0	65	Dimethyl@N-term; Dimethyl(K)@8		-0.000640617	938.579	470.297	938.58	470.297	2														5114.99	1065.97	423.78
P00359	Glyceraldehyde-3-phosphate dehydrogenase 3	IVSNASCTTNCLAPLAK	0	69	Dimethyl:2H(4)@N-term; Carbamidomethyl(C)@7; Carbamidomethyl(C)@11; Dimethyl:2H(4)(K)@17		-0.00281591	1883.01	628.676	1883.01	628.677	3														2245.52	236.78	219.09
P00359	Glyceraldehyde-3-phosphate dehydrogenase 3	VINDAFGIEEGLMTTVH	0	70	Dimethyl@N-term	cleaved H-S@C-term	0.0477485	1872.98	625.333	1872.93	625.317	3														719.53	989.91	228.02
P00359	Glyceraldehyde-3-phosphate dehydrogenase 3	VINDAFGIEEGLMTTVH	0	73	Dimethyl:2H(4)@N-term	cleaved H-S@C-term	-0.0049594	1876.95	939.482	1876.95	939.484	2														230.03	225.15	101.04
P00359	Glyceraldehyde-3-phosphate dehydrogenase 3	IVSNASCTTNCLAPLAK	0	77	Dimethyl:2H(4)@N-term; Carbamidomethyl(C)@7; Carbamidomethyl(C)@11; Pro->pyro-Glu(P)@14; Dimethyl:2H(4)(K)@17		0.0330511	1897.02	633.348	1896.99	633.337	3														518.78	1342.88	513.19
P00359	Glyceraldehyde-3-phosphate dehydrogenase 3	VINDAFGIEEGLMTTVHSLTATQK	0	78	Dimethyl:2H(4)@N-term; Oxidation(M)@13; Dimethyl:2H(4)(K)@24		-0.00441928	2654.4	885.808	2654.41	885.81	3														277.77	0	0
P00359	Glyceraldehyde-3-phosphate dehydrogenase 3	VAINGFGR	0	84	Dimethyl:2H(4)@N-term		0.000138565	864.512	433.263	864.512	433.263	2														728.05	888.97	363.79
P00359	Glyceraldehyde-3-phosphate dehydrogenase 3	VLPELQGK	0	85	Dimethyl:2H(4)@N-term; Dimethyl:2H(4)(K)@8		0.00155009	946.632	474.323	946.63	474.322	2														5410.26	1149.83	461.61
P00359	Glyceraldehyde-3-phosphate dehydrogenase 3	DPANLPWGSSNVDIAIDSTGVFK	0	87	Dimethyl:2H(4)@N-term; Cation:Na(D)@13; Dimethyl:2H(4)(K)@23		0.000290049	2488.27	830.431	2488.27	830.431	3														314.62	0	0
P00359	Glyceraldehyde-3-phosphate dehydrogenase 3	DPANLPWGSSNVDIAIDSTGVFK	0	89	Dimethyl:2H(4)@N-term; Dimethyl:2H(4)(K)@23		1.0111	2467.3	823.44	2466.29	823.103	3														0	0	0
P00359	Glyceraldehyde-3-phosphate dehydrogenase 3	VLPELQGK	0	89	Dimethyl:2H(4)@N-term; Dimethyl:2H(4)(K)@8		0.000939738	946.631	474.323	946.63	474.322	2														3204.55	419.12	292.01
P00359	Glyceraldehyde-3-phosphate dehydrogenase 3	VLPELQGK	0	91	Dimethyl:2H(4)@N-term; Dimethyl:2H(4)(K)@8		0.00061239	946.631	474.323	946.63	474.322	2														4374.63	821.02	350.23
P00359	Glyceraldehyde-3-phosphate dehydrogenase 3	VVITAPSSTAPMFVMGVNEEK	0	91	Dimethyl@N-term; Dimethyl(K)@21		0.00113138	2262.17	755.062	2262.16	755.062	3														1431.1	609.94	194.32
P00359	Glyceraldehyde-3-phosphate dehydrogenase 3	NDPFITNDYAAYMFK	0	92	Dimethyl:2H(4)@N-term; Dimethyl:2H(4)(K)@15	cleaved L-N@N-term	0.00851007	1872.93	625.317	1872.92	625.314	3														137.31	410.35	138.6
P00359	Glyceraldehyde-3-phosphate dehydrogenase 3	CLAPLAK	0	93	Dimethyl:2H(4)@N-term; Carbamidomethyl(C)@1; Dimethyl:2H(4)(K)@7	cleaved N-C@N-term	0.00202707	835.546	418.78	835.544	418.779	2														1074.7	178.55	106.33
P00359	Glyceraldehyde-3-phosphate dehydrogenase 3	IVSNASCTTNCLAPLAK	0	93	Dimethyl:2H(4)@N-term; Carbamidomethyl(C)@7; Carbamidomethyl(C)@11; Dimethyl:2H(4)(K)@17		1.9859	1885	629.339	1883.01	628.677	3														0	0	0
P00359	Glyceraldehyde-3-phosphate dehydrogenase 3	VLPELQGK	0	93	Dimethyl:2H(4)@N-term; Deamidated(Q)@6; Dimethyl:2H(4)(K)@8		0.0200183	947.634	474.824	947.614	474.814	2														5335.86	996	409.46
P00359	Glyceraldehyde-3-phosphate dehydrogenase 3	VAINGFGR	0	94	Dimethyl:2H(4)@N-term; Deamidated(N)@4		0.00129395	865.497	433.756	865.496	433.755	2														1141.87	518.58	203.06
P00359	Glyceraldehyde-3-phosphate dehydrogenase 3	VAINGFGR	0	94	Dimethyl:2H(4)@N-term; Deamidated(N)@4		0.00385744	865.5	433.757	865.496	433.755	2														547.42	66.63	93.44
P00359	Glyceraldehyde-3-phosphate dehydrogenase 3	VVITAPSSTAPMFVMGVNEEK	0	95	Dimethyl:2H(4)@N-term; Cation:Na(E)@19; Dimethyl:2H(4)(K)@21		-0.000902505	2292.2	765.072	2292.2	765.073	3														411.76	0	0
P00359	Glyceraldehyde-3-phosphate dehydrogenase 3	YAGEVSHDDKHIIVDGK	0	96	Dimethyl:2H(4)@N-term; Dimethyl:2H(4)(K)@10; Dimethyl:2H(4)(K)@17	missed K-H@10	-0.00259299	1978.09	660.37	1978.09	660.371	3														270.5	18.11	39.31
P00359	Glyceraldehyde-3-phosphate dehydrogenase 3	KVVITAPSSTAPM	0	97	Dimethyl:2H(4)@N-term; Dimethyl:2H(4)(K)@1	cleaved M-F@C-term; missed K-V@1	-0.000352154	1364.82	683.417	1364.82	683.417	2														611.69	111.72	151.24
P00359	Glyceraldehyde-3-phosphate dehydrogenase 3	PNVEVVALNDPFITNDYAAYMFK	0	97	Dimethyl:2H(4)@N-term; Dehydrated(E)@4; Deamidated(N)@9; Deamidated(N)@15; Dimethyl:2H(4)(K)@23	cleaved R-P@N-term	0.00745962	2678.35	893.791	2678.34	893.788	3														432.24	0	0
P00359	Glyceraldehyde-3-phosphate dehydrogenase 3	LVSWYDNEYGY	0	97	Dimethyl:2H(4)@N-term	cleaved Y-S@C-term	-0.000657729	1439.65	720.834	1439.65	720.835	2														624.22	0	0
P00359	Glyceraldehyde-3-phosphate dehydrogenase 3	VLPELQGK	0	97	Dimethyl@N-term; Dimethyl(K)@8		-0.000640617	938.579	470.297	938.58	470.297	2														5115.61	1065.97	423.79
P00359	Glyceraldehyde-3-phosphate dehydrogenase 3	LVSWYDNEYGYSTR	0	97	Dimethyl:2H(4)@N-term		-0.00461036	1783.83	892.923	1783.84	892.925	2														216.9	0	0
P00359	Glyceraldehyde-3-phosphate dehydrogenase 3	VVITAPSSTAPMFVM	0	98	Dimethyl:2H(4)@N-term	cleaved M-G@C-term	0.00155312	1581.85	791.931	1581.84	791.93	2														299.83	221.13	97.22
P00359	Glyceraldehyde-3-phosphate dehydrogenase 3	IIPSSTGAAK	0	98	Dimethyl:2H(4)@N-term; Dimethyl:2H(4)(K)@10	cleaved N-I@N-term	-0.00154663	1007.65	504.83	1007.65	504.831	2														703.87	70.52	58.08
P00359	Glyceraldehyde-3-phosphate dehydrogenase 3	TASGNIIPSSTGAAK	0	98	Dimethyl:2H(4)@N-term; Dimethyl:2H(4)(K)@15		0.000572646	1437.83	480.283	1437.83	480.283	3														3181.41	249.94	225.08
P00359	Glyceraldehyde-3-phosphate dehydrogenase 3	LTGMAFR	0	98	Dimethyl:2H(4)@N-term		0.00241698	826.47	414.242	826.467	414.241	2														3159.54	2489.15	604.8
P00359	Glyceraldehyde-3-phosphate dehydrogenase 3	CLAPLAK	0	98	Dimethyl:2H(4)@N-term; Carbamidomethyl(C)@1; Dimethyl:2H(4)(K)@7	cleaved N-C@N-term	0.00263742	835.547	418.781	835.544	418.779	2														1393.24	322.89	122.33
P00359	Glyceraldehyde-3-phosphate dehydrogenase 3	VVITAPSSTAPMFVM	1	98	Dimethyl:2H(4)@N-term	cleaved M-G@C-term	0.00155312	1581.85	791.931	1581.84	791.93	2														299.85	221.13	97.22
P00359	Glyceraldehyde-3-phosphate dehydrogenase 3	VPTVDVSVVDLTVK	0	98	Dimethyl:2H(4)@N-term; Dimethyl:2H(4)(K)@14		-0.000954712	1533.95	767.98	1533.95	767.981	2														1030.1	347	133.41
P00359	Glyceraldehyde-3-phosphate dehydrogenase 3	ETTYDEIKK	0	98	Dimethyl@N-term; Dimethyl(K)@8; Dimethyl(K)@9	missed K-K@8	0.00147609	1209.65	404.224	1209.65	404.224	3														1122.78	562.73	133.94
P00359	Glyceraldehyde-3-phosphate dehydrogenase 3	VVITAPSSTAPMFVMGVNEEK	0	99	Dimethyl:2H(4)@N-term; Deamidated(N)@18; Dimethyl:2H(4)(K)@21		0.0167352	2271.21	758.079	2271.2	758.073	3														1431.31	609.94	194.33
P00359	Glyceraldehyde-3-phosphate dehydrogenase 3	VLPELQGK	0	99	Dimethyl:2H(4)@N-term; Dimethyl:2H(4)(K)@8		0.00155009	946.632	474.323	946.63	474.322	2														5410.26	1149.83	461.61
P00359	Glyceraldehyde-3-phosphate dehydrogenase 3	AKVINDAFGIEEGLMTTVHSLTATQK	0	99	Carbamyl@N-term; Dimethyl:2H(4)(K)@2; Deamidated(N)@5; Dimethyl:2H(4)(K)@26	cleaved L-A@N-term; missed K-V@2	0.0614088	2881.6	961.539	2881.53	961.519	3														0	0	0
P00359	Glyceraldehyde-3-phosphate dehydrogenase 3	LVSWYDNEYGYSTR	0	99	Delta:H(2)C(2)@N-term; Trp->Kynurenin(W)@4		0.0332023	1781.82	594.948	1781.79	594.937	3
P00359	Glyceraldehyde-3-phosphate dehydrogenase 3	GVLGYTEDAVVSSDFLGDSH	2	99	Dimethyl:2H(4)@N-term	cleaved H-S@C-term	0.0273948	2099.03	1050.52	2099	1050.51	2														81.58	0	0
P00359	Glyceraldehyde-3-phosphate dehydrogenase 3	LVSWYDNEYGY	2	99	Dimethyl:2H(4)@N-term	cleaved Y-S@C-term	-0.000657729	1439.65	720.834	1439.65	720.835	2														624.22	0	0
P00359	Glyceraldehyde-3-phosphate dehydrogenase 3	LVSWYDNEYGYSTR	2	99	Dimethyl:2H(4)@N-term		-0.00189742	1783.83	595.619	1783.84	595.619	3														981.6	1089.64	265.36
P00359	Glyceraldehyde-3-phosphate dehydrogenase 3	VVDLVEH	2	99	Dimethyl:2H(4)@N-term	cleaved H-V@C-term	-0.00155176	841.483	421.749	841.485	421.75	2														182.74	181.43	106.94
P00359	Glyceraldehyde-3-phosphate dehydrogenase 3	VVITAPSSTAPM	1	99	Dimethyl:2H(4)@N-term	cleaved M-F@C-term	-0.00025937	1204.67	603.341	1204.67	603.341	2														638.84	808.26	208.91
P00359	Glyceraldehyde-3-phosphate dehydrogenase 3	LTGMAFR	0	99	Dimethyl:2H(4)@N-term		0.00241698	826.47	414.242	826.467	414.241	2														3159.57	2489.15	604.81
P00359	Glyceraldehyde-3-phosphate dehydrogenase 3	LTGMAFR	0	99	Dimethyl:2H(4)@N-term		0.00241698	826.47	414.242	826.467	414.241	2														3159.55	2489.15	604.8
P00359	Glyceraldehyde-3-phosphate dehydrogenase 3	LVSWYDNEYGY	0	99	Dimethyl:2H(4)@N-term	cleaved Y-S@C-term	-0.000657729	1439.65	720.834	1439.65	720.835	2														624.26	0	0
P00359	Glyceraldehyde-3-phosphate dehydrogenase 3	LVSWYDNEYGYSTR	0	99	Dimethyl:2H(4)@N-term		-0.000215807	1783.84	892.925	1783.84	892.925	2														896.52	879.73	223.88
P00359	Glyceraldehyde-3-phosphate dehydrogenase 3	LVSWYDNEYGYSTR	0	99	Dimethyl:2H(4)@N-term		-0.00189742	1783.83	595.619	1783.84	595.619	3														981.57	1089.64	265.27
P00359	Glyceraldehyde-3-phosphate dehydrogenase 3	LVSWYDNEYGYSTR	0	99	Dimethyl:2H(4)@N-term		-0.00189742	1783.83	595.619	1783.84	595.619	3														981.57	1089.64	265.25
P00359	Glyceraldehyde-3-phosphate dehydrogenase 3	LVSWYDNEYGYSTR	0	99	Dimethyl:2H(4)@N-term		-0.000215807	1783.84	892.925	1783.84	892.925	2														896.52	879.73	223.88
P00359	Glyceraldehyde-3-phosphate dehydrogenase 3	LVSWYDNEYGYSTR	0	99	Dimethyl:2H(4)@N-term		-0.00189742	1783.83	595.619	1783.84	595.619	3														981.8	1089.64	265.59
P00359	Glyceraldehyde-3-phosphate dehydrogenase 3	LVSWYDNEYGYSTR	0	99	Dimethyl:2H(4)@N-term		2.83e-05	1783.84	892.925	1783.84	892.925	2														882.08	868.71	222.72
P00359	Glyceraldehyde-3-phosphate dehydrogenase 3	LVSWYDNEYGYSTR	0	99	Dimethyl:2H(4)@N-term		0.00139849	1783.84	595.62	1783.84	595.619	3														404.82	316.89	128.8
P00359	Glyceraldehyde-3-phosphate dehydrogenase 3	LVSWYDNEYGYSTR	0	99	Dimethyl:2H(4)@N-term		-0.000337878	1783.84	892.925	1783.84	892.925	2														168.64	116.93	74.4
P00359	Glyceraldehyde-3-phosphate dehydrogenase 3	LVSWYDNEYGYSTR	0	99	Dimethyl:2H(4)@N-term		-0.00189742	1783.83	595.619	1783.84	595.619	3														981.49	1089.64	265.27
P00359	Glyceraldehyde-3-phosphate dehydrogenase 3	LVSWYDNEYGYSTR	0	99	Dimethyl:2H(4)@N-term		-0.00189742	1783.83	595.619	1783.84	595.619	3														981.57	1089.64	265.27
P00359	Glyceraldehyde-3-phosphate dehydrogenase 3	LVSWYDNEYGYSTR	0	99	Dimethyl:2H(4)@N-term		-0.00189742	1783.83	595.619	1783.84	595.619	3														981.9	1089.64	265.46
P00359	Glyceraldehyde-3-phosphate dehydrogenase 3	LVSWYDNEYGYSTR	0	99	Dimethyl:2H(4)@N-term		-0.999459	1782.84	595.286	1783.84	595.619	3														185.57	0	0
P00359	Glyceraldehyde-3-phosphate dehydrogenase 3	VAINGFGR	0	99	Dimethyl:2H(4)@N-term		-0.000106387	864.512	433.263	864.512	433.263	2														727.03	874.56	360.87
P00359	Glyceraldehyde-3-phosphate dehydrogenase 3	VINDAFGIEEGLMTTVH	0	99	Dimethyl:2H(4)@N-term	cleaved H-S@C-term	7.03e-05	1876.95	626.659	1876.95	626.659	3														830.07	1211.05	251.67
P00359	Glyceraldehyde-3-phosphate dehydrogenase 3	VINDAFGIEEGLMTTVH	0	99	Dimethyl:2H(4)@N-term	cleaved H-S@C-term	0.00101923	1876.96	939.485	1876.95	939.484	2														702.64	735.43	196.11
P00359	Glyceraldehyde-3-phosphate dehydrogenase 3	VINDAFGIEEGLMTTVH	0	99	Dimethyl:2H(4)@N-term	cleaved H-S@C-term	7.03e-05	1876.95	626.659	1876.95	626.659	3														830.08	1211.05	251.67
P00359	Glyceraldehyde-3-phosphate dehydrogenase 3	VINDAFGIEEGLMTTVH	0	99	Dimethyl:2H(4)@N-term	cleaved H-S@C-term	2.00225	1878.96	940.486	1876.95	939.484	2														671.87	700.04	191.42
P00359	Glyceraldehyde-3-phosphate dehydrogenase 3	VINDAFGIEEGLMTTVH	0	99	Dimethyl:2H(4)@N-term	cleaved H-S@C-term	-0.00139062	1876.95	626.658	1876.95	626.659	3														830.34	1207.63	251.33
P00359	Glyceraldehyde-3-phosphate dehydrogenase 3	VINDAFGIEEGLMTTVH	0	99	Dimethyl:2H(4)@N-term	cleaved H-S@C-term	-0.000198644	1876.95	939.484	1876.95	939.484	2														702.89	732.84	195.85
P00359	Glyceraldehyde-3-phosphate dehydrogenase 3	VINDAFGIEEGLMTTVH	0	99	Dimethyl:2H(4)@N-term	cleaved H-S@C-term	7.03e-05	1876.95	626.659	1876.95	626.659	3														830.06	1211.05	251.67
P00359	Glyceraldehyde-3-phosphate dehydrogenase 3	TTNCLAPLAK	0	99	Dimethyl:2H(4)@N-term; Carbamidomethyl(C)@4; Dimethyl:2H(4)(K)@10	cleaved C-T@N-term	-0.00381246	1151.68	576.847	1151.68	576.848	2														325.5	235.77	153.02
P00359	Glyceraldehyde-3-phosphate dehydrogenase 3	IVSNASCTTNCLAPLAK	0	99	Dimethyl:2H(4)@N-term; Carbamidomethyl(C)@7; Carbamidomethyl(C)@11; Dimethyl:2H(4)(K)@17		-0.00023876	1883.01	942.512	1883.01	942.512	2														1289.1	0	0
P00359	Glyceraldehyde-3-phosphate dehydrogenase 3	IVSNASCTTNCLAPLAK	0	99	Dimethyl:2H(4)@N-term; Carbamidomethyl(C)@7; Carbamidomethyl(C)@11; Dimethyl:2H(4)(K)@17		-0.00281591	1883.01	628.676	1883.01	628.677	3														2245.48	0	0
P00359	Glyceraldehyde-3-phosphate dehydrogenase 3	IVSNASCTTNCLAPLAK	0	99	Dimethyl:2H(4)@N-term; Carbamidomethyl(C)@7; Carbamidomethyl(C)@11; Dimethyl:2H(4)(K)@17		-0.00281591	1883.01	628.676	1883.01	628.677	3														2245.52	236.78	219.09
P00359	Glyceraldehyde-3-phosphate dehydrogenase 3	IVSNASCTTNCLAPLAK	0	99	Dimethyl:2H(4)@N-term; Carbamidomethyl(C)@7; Carbamidomethyl(C)@11; Dimethyl:2H(4)(K)@17		-0.00281591	1883.01	628.676	1883.01	628.677	3														2245.4	236.78	219.04
P00359	Glyceraldehyde-3-phosphate dehydrogenase 3	IVSNASCTTNCLAPLAK	0	99	Dimethyl:2H(4)@N-term; Carbamidomethyl(C)@7; Carbamidomethyl(C)@11; Dimethyl:2H(4)(K)@17		2.00037	1885.01	629.344	1883.01	628.677	3														0	0	0
P00359	Glyceraldehyde-3-phosphate dehydrogenase 3	IVSNASCTTNCLAPLAK	0	99	Dimethyl:2H(4)@N-term; Carbamidomethyl(C)@7; Deamidated(N)@10; Carbamidomethyl(C)@11; Dimethyl:2H(4)(K)@17		0.00102644	1883.99	629.005	1883.99	629.005	3														1034.06	0	0
P00359	Glyceraldehyde-3-phosphate dehydrogenase 3	IVSNASCTTNCLAPLAK	0	99	Dimethyl:2H(4)@N-term; Carbamidomethyl(C)@7; Deamidated(N)@10; Carbamidomethyl(C)@11; Dimethyl:2H(4)(K)@17		0.015858	1884.01	629.01	1883.99	629.005	3														2245.38	0	0
P00359	Glyceraldehyde-3-phosphate dehydrogenase 3	IVSNASCTTNCLAPLAK	0	99	Dimethyl:2H(4)@N-term; Carbamidomethyl(C)@7; Deamidated(N)@10; Carbamidomethyl(C)@11; Dimethyl:2H(4)(K)@17		0.0184215	1884.01	629.011	1883.99	629.005	3														2245.43	236.78	219.04
P00359	Glyceraldehyde-3-phosphate dehydrogenase 3	IVSNASCTTNCLAPLAK	0	99	Dimethyl:2H(4)@N-term; Carbamidomethyl(C)@7; Deamidated(N)@10; Carbamidomethyl(C)@11; Dimethyl:2H(4)(K)@17		0.00158997	1884	943.005	1883.99	943.004	2														464.16	0	0
P00359	Glyceraldehyde-3-phosphate dehydrogenase 3	IVSNASCTTNCLAPLAK	0	99	Dimethyl:2H(4)@N-term; Carbamidomethyl(C)@7; Deamidated(N)@10; Carbamidomethyl(C)@11; Dimethyl:2H(4)(K)@17		-0.003185	1883.99	629.004	1883.99	629.005	3														859.12	0	0
P00359	Glyceraldehyde-3-phosphate dehydrogenase 3	VINDAFGIEEGLMTTVH	0	99	Dimethyl:2H(4)@N-term; Cation:Na(E)@10	cleaved H-S@C-term	0.00183391	1898.94	633.987	1898.94	633.986	3														183.97	185.21	98.41
P00359	Glyceraldehyde-3-phosphate dehydrogenase 3	VVITAPSSTAPMFVMGVNEEK	0	99	Dimethyl:2H(4)@N-term; Cation:Na(E)@19; Dimethyl:2H(4)(K)@21		-0.00382513	2292.19	574.055	2292.2	574.056	4														166.42	0	0
P00359	Glyceraldehyde-3-phosphate dehydrogenase 3	VVITAPSSTAPMFVMGVNEEK	0	99	Dimethyl:2H(4)@N-term; Deamidated(N)@18; Dimethyl:2H(4)(K)@21		0.0157721	2271.21	568.811	2271.2	568.807	4														606.31	54.25	56.76
P00359	Glyceraldehyde-3-phosphate dehydrogenase 3	PNVEVVALNDPFITNDYAAYMFK	0	99	Dimethyl:2H(4)@N-term; Deamidated(N)@2; Dehydrated(E)@4; Deamidated(N)@9; Deamidated(N)@15; Dimethyl:2H(4)(K)@23	cleaved R-P@N-term	0.0171604	2679.34	894.122	2679.33	894.116	3														137.11	0	0
P00359	Glyceraldehyde-3-phosphate dehydrogenase 3	PNVEVVALNDPFITNDYAAYMFK	0	99	Dimethyl:2H(4)@N-term; Deamidated(N)@2; Dehydrated(E)@4; Deamidated(N)@9; Dimethyl:2H(4)(K)@23	cleaved R-P@N-term	0.00745962	2678.35	893.791	2678.34	893.788	3														432.24	0	0
P00359	Glyceraldehyde-3-phosphate dehydrogenase 3	VINDAFGIEEGLMTTVH	0	99	Dimethyl:2H(4)@N-term; Deamidated(N)@3	cleaved H-S@C-term	0.0155447	1877.95	939.984	1877.94	939.976	2														693.42	332.04	131.83
P00359	Glyceraldehyde-3-phosphate dehydrogenase 3	VINDAFGIEEGLMTTVHSLTATQK	0	99	Dimethyl:2H(4)@N-term; Deamidated(N)@3; Dimethyl:2H(4)(K)@24		-0.00253669	2639.39	880.805	2639.4	880.806	3														329.9	0	0
P00359	Glyceraldehyde-3-phosphate dehydrogenase 3	VAINGFGR	2	99	Dimethyl:2H(4)@N-term; Deamidated(N)@4		0.00129395	865.497	433.756	865.496	433.755	2														2418.04	1056.23	394.01
P00359	Glyceraldehyde-3-phosphate dehydrogenase 3	VAINGFGR	0	99	Dimethyl:2H(4)@N-term; Deamidated(N)@4		0.00129395	865.497	433.756	865.496	433.755	2														2417.9	1056.23	394.13
P00359	Glyceraldehyde-3-phosphate dehydrogenase 3	VAINGFGR	0	99	Dimethyl:2H(4)@N-term; Deamidated(N)@4		0.00129395	865.497	433.756	865.496	433.755	2														1141.82	518.58	202.72
P00359	Glyceraldehyde-3-phosphate dehydrogenase 3	IVSNASCTTNCLAPLAK	0	99	Dimethyl:2H(4)@N-term; Deamidated(N)@4; Carbamidomethyl(C)@7; Carbamidomethyl(C)@11; Dimethyl:2H(4)(K)@17		-0.00243837	1883.99	943.003	1883.99	943.004	2														342.88	147.94	84.35
P00359	Glyceraldehyde-3-phosphate dehydrogenase 3	IVSNASCTTNCLAPLAK	0	99	Dimethyl:2H(4)@N-term; Deamidated(N)@4; Carbamidomethyl(C)@7; Carbamidomethyl(C)@11; Dimethyl:2H(4)(K)@17		-0.00281879	1883.99	629.004	1883.99	629.005	3														630.29	479.51	151.9
P00359	Glyceraldehyde-3-phosphate dehydrogenase 3	IVSNASCTTNCLAPLAK	0	99	Dimethyl:2H(4)@N-term; Deamidated(N)@4; Carbamidomethyl(C)@7; Carbamidomethyl(C)@11; Dimethyl:2H(4)(K)@17		-0.003185	1883.99	629.004	1883.99	629.005	3														859.16	0	0
P00359	Glyceraldehyde-3-phosphate dehydrogenase 3	IVSNASCTTNCLAPLAK	0	99	Dimethyl:2H(4)@N-term; Deamidated(N)@4; Carbamidomethyl(C)@7; Carbamidomethyl(C)@11; Dimethyl:2H(4)(K)@17		-0.00226947	1883.99	629.004	1883.99	629.005	3														256.85	0	0
P00359	Glyceraldehyde-3-phosphate dehydrogenase 3	TASGNIIPSSTGAAK	0	99	Dimethyl:2H(4)@N-term; Deamidated(N)@5; Dimethyl:2H(4)(K)@15		0.000248678	1438.81	720.413	1438.81	720.413	2														415.73	0	0
P00359	Glyceraldehyde-3-phosphate dehydrogenase 3	TASGNIIPSSTGAAK	0	99	Dimethyl:2H(4)@N-term; Deamidated(N)@5; Dimethyl:2H(4)(K)@15		0.000248678	1438.81	720.413	1438.81	720.413	2														415.66	0	0
P00359	Glyceraldehyde-3-phosphate dehydrogenase 3	LVSWYDNEYGYSTR	0	99	Dimethyl:2H(4)@N-term; Deamidated(N)@7		0.00405375	1784.82	893.419	1784.82	893.417	2														305.87	124.75	76.02
P00359	Glyceraldehyde-3-phosphate dehydrogenase 3	LVSWYDNEYGYSTR	0	99	Dimethyl:2H(4)@N-term; Deamidated(N)@7		0.00285981	1784.82	595.948	1784.82	595.947	3														298.57	247.22	105.33
P00359	Glyceraldehyde-3-phosphate dehydrogenase 3	LVSWYDNEYGYSTR	0	99	Dimethyl:2H(4)@N-term; Deamidated(N)@7		0.00285981	1784.82	595.948	1784.82	595.947	3														298.59	247.22	105.31
P00359	Glyceraldehyde-3-phosphate dehydrogenase 3	LVSWYDNEYGYSTR	0	99	Dimethyl:2H(4)@N-term; Deamidated(N)@7		0.00405375	1784.82	893.419	1784.82	893.417	2														305.78	124.75	75.93
P00359	Glyceraldehyde-3-phosphate dehydrogenase 3	DASAGIQLSPK	0	99	Dimethyl:2H(4)@N-term; Deamidated(Q)@7; Dimethyl:2H(4)(K)@11	cleaved F-D@N-term	0.0146973	1150.68	576.349	1150.67	576.342	2														517.83	197.09	149.78
P00359	Glyceraldehyde-3-phosphate dehydrogenase 3	PNVEVVALNDPFITNDYAAYMFK	2	99	Dimethyl:2H(4)@N-term; Dehydrated(E)@4; Dimethyl:2H(4)(K)@23	cleaved R-P@N-term	-0.0340977	2676.34	893.121	2676.38	893.132	3														215.67	16.71	24.39
P00359	Glyceraldehyde-3-phosphate dehydrogenase 3	LVSWYDNEYGYSTR	0	99	Dimethyl:2H(4)@N-term; Dehydrated(S)@3; Oxidation(W)@4		7.55e-05	1781.82	891.917	1781.82	891.917	2														315.53	90.95	68.31
P00359	Glyceraldehyde-3-phosphate dehydrogenase 3	TASGNIIPSSTGAAK	0	99	Dimethyl:2H(4)@N-term; Didehydro(T)@1; Dimethyl:2H(4)(K)@15		-0.00279248	1435.81	718.912	1435.81	718.913	2														409.44	0	0
P00359	Glyceraldehyde-3-phosphate dehydrogenase 3	ETTYDEIKK	0	99	Dimethyl:2H(4)@N-term; Didehydro(T)@2; Dimethyl:2H(4)(K)@8; Dimethyl:2H(4)(K)@9	missed K-K@8	-0.00243238	1219.71	610.861	1219.71	610.862	2														384.77	102.87	64.74
P00359	Glyceraldehyde-3-phosphate dehydrogenase 3	ETTYDEIKK	0	99	Dimethyl:2H(4)@N-term; Didehydro(T)@2; Dimethyl:2H(4)(K)@8; Dimethyl:2H(4)(K)@9	missed K-K@8	0.000838011	1219.71	407.577	1219.71	407.577	3														610.45	421.5	127.63
P00359	Glyceraldehyde-3-phosphate dehydrogenase 3	VVITAPSSTAPMFVMGVNEEK	0	99	Dimethyl:2H(4)@N-term; Didehydro(T)@4; Dimethyl:2H(4)(K)@21		0.00122065	2268.2	757.074	2268.2	757.073	3														246.35	0	0
P00359	Glyceraldehyde-3-phosphate dehydrogenase 3	KVVITAPSSTAPMFVMGVNEEK	2	99	Dimethyl:2H(4)@N-term; Dimethyl:2H(4)(K)@1; Dimethyl:2H(4)(K)@22	missed K-V@1	0.00260139	2430.37	811.13	2430.37	811.129	3														538.04	0	0
P00359	Glyceraldehyde-3-phosphate dehydrogenase 3	KVVITAPSSTAPMFVMGVNEEK	0	99	Dimethyl:2H(4)@N-term; Dimethyl:2H(4)(K)@1; Dimethyl:2H(4)(K)@22	missed K-V@1	0.00260139	2430.37	811.13	2430.37	811.129	3														538.04	0	0
P00359	Glyceraldehyde-3-phosphate dehydrogenase 3	KVVITAPSSTAPMFVMGVNEEK	0	99	Dimethyl:2H(4)@N-term; Dimethyl:2H(4)(K)@1; Dimethyl:2H(4)(K)@22	missed K-V@1	0.00260139	2430.37	811.13	2430.37	811.129	3														538.25	0	0
P00359	Glyceraldehyde-3-phosphate dehydrogenase 3	KVVITAPSSTAPMFVMGVNEEK	0	99	Dimethyl:2H(4)@N-term; Dimethyl:2H(4)(K)@1; Oxidation(M)@13; Dimethyl:2H(4)(K)@22	missed K-V@1	0.00438847	2446.36	816.462	2446.36	816.461	3														158.51	0	0
P00359	Glyceraldehyde-3-phosphate dehydrogenase 3	VVDLVEHVAK	2	99	Dimethyl:2H(4)@N-term; Dimethyl:2H(4)(K)@10		0.00182967	1171.74	391.588	1171.74	391.588	3														2787.52	0	0
P00359	Glyceraldehyde-3-phosphate dehydrogenase 3	IIPSSTGAAK	0	99	Dimethyl:2H(4)@N-term; Dimethyl:2H(4)(K)@10	cleaved N-I@N-term	-0.00154663	1007.65	504.83	1007.65	504.831	2														703.87	70.52	58.08
P00359	Glyceraldehyde-3-phosphate dehydrogenase 3	IIPSSTGAAK	0	99	Dimethyl:2H(4)@N-term; Dimethyl:2H(4)(K)@10	cleaved N-I@N-term	-0.00154663	1007.65	504.83	1007.65	504.831	2														703.87	70.52	58.08
P00359	Glyceraldehyde-3-phosphate dehydrogenase 3	VVDLVEHVAK	0	99	Dimethyl:2H(4)@N-term; Dimethyl:2H(4)(K)@10		0.00182967	1171.74	391.588	1171.74	391.588	3														2787.43	0	0
P00359	Glyceraldehyde-3-phosphate dehydrogenase 3	VVDLVEHVAK	0	99	Dimethyl:2H(4)@N-term; Dimethyl:2H(4)(K)@10		0.00182967	1171.74	391.588	1171.74	391.588	3														2787.44	0	0
P00359	Glyceraldehyde-3-phosphate dehydrogenase 3	YAGEVSHDDKHIIVDGK	2	99	Dimethyl:2H(4)@N-term; Dimethyl:2H(4)(K)@10; Dimethyl:2H(4)(K)@17	missed K-H@10	-0.00259299	1978.09	660.37	1978.09	660.371	3														270.59	18.11	39.31
P00359	Glyceraldehyde-3-phosphate dehydrogenase 3	YAGEVSHDDKHIIVDGK	0	99	Dimethyl:2H(4)@N-term; Dimethyl:2H(4)(K)@10; Dimethyl:2H(4)(K)@17	missed K-H@10	0.00159887	1978.09	495.531	1978.09	495.53	4														836.19	199.19	91.79
P00359	Glyceraldehyde-3-phosphate dehydrogenase 3	YAGEVSHDDKHIIVDGK	0	99	Dimethyl:2H(4)@N-term; Dimethyl:2H(4)(K)@10; Dimethyl:2H(4)(K)@17	missed K-H@10	0.00159887	1978.09	495.531	1978.09	495.53	4														836.25	199.19	91.79
P00359	Glyceraldehyde-3-phosphate dehydrogenase 3	YAGEVSHDDKHIIVDGK	0	99	Dimethyl:2H(4)@N-term; Dimethyl:2H(4)(K)@10; Dimethyl:2H(4)(K)@17	missed K-H@10	0.00207793	1978.09	396.626	1978.09	396.626	5														687.51	0	0
P00359	Glyceraldehyde-3-phosphate dehydrogenase 3	DASAGIQLSPK	0	99	Dimethyl:2H(4)@N-term; Dimethyl:2H(4)(K)@11	cleaved F-D@N-term	0.999445	1150.68	576.349	1149.68	575.85	2														340.54	0	0
P00359	Glyceraldehyde-3-phosphate dehydrogenase 3	VPTVDVSVVDLTVK	0	99	Dimethyl:2H(4)@N-term; Dimethyl:2H(4)(K)@14		0.000252991	1533.95	512.323	1533.95	512.323	3														660.85	157.75	83.69
P00359	Glyceraldehyde-3-phosphate dehydrogenase 3	VPTVDVSVVDLTVK	0	99	Dimethyl:2H(4)@N-term; Dimethyl:2H(4)(K)@14		-0.000954712	1533.95	767.98	1533.95	767.981	2														1030.07	347	133.4
P00359	Glyceraldehyde-3-phosphate dehydrogenase 3	VPTVDVSVVDLTVK	0	99	Dimethyl:2H(4)@N-term; Dimethyl:2H(4)(K)@14		-0.000954712	1533.95	767.98	1533.95	767.981	2														1030.11	347	133.41
P00359	Glyceraldehyde-3-phosphate dehydrogenase 3	VPTVDVSVVDLTVK	0	99	Dimethyl:2H(4)@N-term; Dimethyl:2H(4)(K)@14		-0.000954712	1533.95	767.98	1533.95	767.981	2														1030.1	347	133.38
P00359	Glyceraldehyde-3-phosphate dehydrogenase 3	VPTVDVSVVDLTVK	0	99	Dimethyl:2H(4)@N-term; Dimethyl:2H(4)(K)@14		-0.000113221	1533.95	512.323	1533.95	512.323	3														529.98	136.85	78.15
P00359	Glyceraldehyde-3-phosphate dehydrogenase 3	TASGNIIPSSTGAAK	0	99	Dimethyl:2H(4)@N-term; Dimethyl:2H(4)(K)@15		0.00183715	1437.83	719.922	1437.83	719.921	2														4551.33	601.5	348.91
P00359	Glyceraldehyde-3-phosphate dehydrogenase 3	TASGNIIPSSTGAAK	0	99	Dimethyl:2H(4)@N-term; Dimethyl:2H(4)(K)@15		0.00183715	1437.83	719.922	1437.83	719.921	2														4551.35	601.5	348.91
P00359	Glyceraldehyde-3-phosphate dehydrogenase 3	TASGNIIPSSTGAAK	0	99	Dimethyl:2H(4)@N-term; Dimethyl:2H(4)(K)@15		0.00183715	1437.83	719.922	1437.83	719.921	2														4551.46	601.5	348.9
P00359	Glyceraldehyde-3-phosphate dehydrogenase 3	TASGNIIPSSTGAAK	0	99	Dimethyl:2H(4)@N-term; Dimethyl:2H(4)(K)@15		0.00183715	1437.83	719.922	1437.83	719.921	2														4551.47	601.5	348.91
P00359	Glyceraldehyde-3-phosphate dehydrogenase 3	TASGNIIPSSTGAAK	0	99	Dimethyl:2H(4)@N-term; Dimethyl:2H(4)(K)@15		0.00159301	1437.83	719.922	1437.83	719.921	2														4552.33	596.65	347.5
P00359	Glyceraldehyde-3-phosphate dehydrogenase 3	TASGNIIPSSTGAAK	0	99	Dimethyl:2H(4)@N-term; Dimethyl:2H(4)(K)@15		-0.000604267	1437.83	719.921	1437.83	719.921	2														394.88	0	0
P00359	Glyceraldehyde-3-phosphate dehydrogenase 3	TASGNIIPSSTGAAK	0	99	Dimethyl:2H(4)@N-term; Dimethyl:2H(4)(K)@15		0.000572646	1437.83	480.283	1437.83	480.283	3														3181.44	249.94	225.06
P00359	Glyceraldehyde-3-phosphate dehydrogenase 3	TASGNIIPSSTGAAK	0	99	Dimethyl:2H(4)@N-term; Dimethyl:2H(4)(K)@15		-0.00455433	1437.82	480.282	1437.83	480.283	3														288.38	0	0
P00359	Glyceraldehyde-3-phosphate dehydrogenase 3	TASGNIIPSSTGAAK	0	99	Dimethyl:2H(4)@N-term; Dimethyl:2H(4)(K)@15		0.00220336	1437.83	719.922	1437.83	719.921	2														4376.14	568.5	339.32
P00359	Glyceraldehyde-3-phosphate dehydrogenase 3	VVITAPSSTAPMFVMGVNEEK	0	99	Dimethyl:2H(4)@N-term; Dimethyl:2H(4)(K)@21		-0.000656162	2270.21	757.745	2270.21	757.745	3														1431.09	609.94	194.35
P00359	Glyceraldehyde-3-phosphate dehydrogenase 3	VVITAPSSTAPMFVMGVNEEK	0	99	Dimethyl:2H(4)@N-term; Dimethyl:2H(4)(K)@21		-0.000656162	2270.21	757.745	2270.21	757.745	3														1431.1	609.94	194.32
P00359	Glyceraldehyde-3-phosphate dehydrogenase 3	VVITAPSSTAPMFVMGVNEEK	0	99	Dimethyl:2H(4)@N-term; Dimethyl:2H(4)(K)@21		-0.00387732	2270.21	568.56	2270.21	568.561	4														606.31	0	0
P00359	Glyceraldehyde-3-phosphate dehydrogenase 3	VVITAPSSTAPMFVMGVNEEK	0	99	Dimethyl:2H(4)@N-term; Dimethyl:2H(4)(K)@21		-0.000656162	2270.21	757.745	2270.21	757.745	3														1431.33	609.94	194.33
P00359	Glyceraldehyde-3-phosphate dehydrogenase 3	VVITAPSSTAPMFVMGVNEEK	0	99	Dimethyl:2H(4)@N-term; Dimethyl:2H(4)(K)@21		-0.00387732	2270.21	568.56	2270.21	568.561	4														606.31	0	0
P00359	Glyceraldehyde-3-phosphate dehydrogenase 3	VVITAPSSTAPMFVMGVNEEK	0	99	Dimethyl:2H(4)@N-term; Dimethyl:2H(4)(K)@21		-0.00387732	2270.21	568.56	2270.21	568.561	4														606.34	0	0
P00359	Glyceraldehyde-3-phosphate dehydrogenase 3	DPANLPWGSSNVDIAIDSTGVFK	2	99	Dimethyl:2H(4)@N-term; Dimethyl:2H(4)(K)@23		-0.0021168	2466.29	617.579	2466.29	617.579	4														434.44	24.89	45.62
P00359	Glyceraldehyde-3-phosphate dehydrogenase 3	DPANLPWGSSNVDIAIDSTGVFK	0	99	Dimethyl:2H(4)@N-term; Dimethyl:2H(4)(K)@23		-6.31e-06	2466.29	823.103	2466.29	823.103	3														1173.31	0	0
P00359	Glyceraldehyde-3-phosphate dehydrogenase 3	DPANLPWGSSNVDIAIDSTGVFK	0	99	Dimethyl:2H(4)@N-term; Dimethyl:2H(4)(K)@23		-6.31e-06	2466.29	823.103	2466.29	823.103	3														1173.31	0	0
P00359	Glyceraldehyde-3-phosphate dehydrogenase 3	DPANLPWGSSNVDIAIDSTGVFK	0	99	Dimethyl:2H(4)@N-term; Dimethyl:2H(4)(K)@23		-6.31e-06	2466.29	823.103	2466.29	823.103	3														1173.47	0	0
P00359	Glyceraldehyde-3-phosphate dehydrogenase 3	DPANLPWGSSNVDIAIDSTGVFK	0	99	Dimethyl:2H(4)@N-term; Dimethyl:2H(4)(K)@23		-0.000514872	2466.29	1234.15	2466.29	1234.15	2														819.55	0	0
P00359	Glyceraldehyde-3-phosphate dehydrogenase 3	DPANLPWGSSNVDIAIDSTGVFK	0	99	Dimethyl:2H(4)@N-term; Dimethyl:2H(4)(K)@23		-6.31e-06	2466.29	823.103	2466.29	823.103	3														1173.45	0	0
P00359	Glyceraldehyde-3-phosphate dehydrogenase 3	DPANLPWGSSNVDIAIDSTGVFK	0	99	Dimethyl:2H(4)@N-term; Dimethyl:2H(4)(K)@23		0.00145854	2466.29	823.104	2466.29	823.103	3														161.21	0	0
P00359	Glyceraldehyde-3-phosphate dehydrogenase 3	VINDAFGIEEGLMTTVHSLTATQK	2	99	Dimethyl:2H(4)@N-term; Dimethyl:2H(4)(K)@24		-0.00463947	2638.41	660.609	2638.41	660.61	4														519.31	0	0
P00359	Glyceraldehyde-3-phosphate dehydrogenase 3	VINDAFGIEEGLMTTVHSLTATQK	0	99	Dimethyl:2H(4)@N-term; Dimethyl:2H(4)(K)@24		-0.00463947	2638.41	660.609	2638.41	660.61	4														519.31	0	0
P00359	Glyceraldehyde-3-phosphate dehydrogenase 3	VINDAFGIEEGLMTTVHSLTATQK	0	99	Dimethyl:2H(4)@N-term; Dimethyl:2H(4)(K)@24		-0.000884842	2638.41	880.478	2638.41	880.478	3														743.92	126.91	67.6
P00359	Glyceraldehyde-3-phosphate dehydrogenase 3	VINDAFGIEEGLMTTVHSLTATQK	0	99	Dimethyl:2H(4)@N-term; Dimethyl:2H(4)(K)@24		-0.000884842	2638.41	880.478	2638.41	880.478	3														743.93	126.91	67.6
P00359	Glyceraldehyde-3-phosphate dehydrogenase 3	SRPNVEVVALNDPFITNDYAAYMFK	2	99	Dimethyl:2H(4)@N-term; Dimethyl:2H(4)(K)@25	cleaved L-S@N-term	0.0101184	2937.53	980.183	2937.52	980.18	3														92.62	0	0
P00359	Glyceraldehyde-3-phosphate dehydrogenase 3	IALSRPNVEVVALNDPFITNDYAAYMFK	2	99	Dimethyl:2H(4)@N-term; Dimethyl:2H(4)(K)@28		0.00135632	3234.73	1079.25	3234.72	1079.25	3														190.93	0	0
P00359	Glyceraldehyde-3-phosphate dehydrogenase 3	ETTYDEIK	2	99	Dimethyl:2H(4)@N-term; Dimethyl:2H(4)(K)@8		-0.0317953	1061.54	531.778	1061.57	531.794	2														0	30959.5	1541.95
P00359	Glyceraldehyde-3-phosphate dehydrogenase 3	VLPELQGK	0	99	Dimethyl:2H(4)@N-term; Dimethyl:2H(4)(K)@8		0.00122274	946.631	474.323	946.63	474.322	2														5409.65	1125.14	456.55
P00359	Glyceraldehyde-3-phosphate dehydrogenase 3	VLPELQGK	0	99	Dimethyl:2H(4)@N-term; Dimethyl:2H(4)(K)@8		0.00155009	946.632	474.323	946.63	474.322	2														5409.68	1149.83	461.64
P00359	Glyceraldehyde-3-phosphate dehydrogenase 3	VLPELQGK	0	99	Dimethyl:2H(4)@N-term; Dimethyl:2H(4)(K)@8		0.00122274	946.631	474.323	946.63	474.322	2														5409.59	1125.14	456.51
P00359	Glyceraldehyde-3-phosphate dehydrogenase 3	ETTYDEIKK	0	99	Dimethyl:2H(4)@N-term; Dimethyl:2H(4)(K)@8; Dimethyl:2H(4)(K)@9	missed K-K@8	-0.00244729	1221.72	611.868	1221.72	611.87	2														499.93	98.74	56.19
P00359	Glyceraldehyde-3-phosphate dehydrogenase 3	ETTYDEIKK	0	99	Dimethyl:2H(4)@N-term; Dimethyl:2H(4)(K)@8; Dimethyl:2H(4)(K)@9	missed K-K@8	0.00146232	1221.73	408.249	1221.72	408.249	3														1122.78	562.73	133.92
P00359	Glyceraldehyde-3-phosphate dehydrogenase 3	ETTYDEIKK	0	99	Dimethyl:2H(4)@N-term; Dimethyl:2H(4)(K)@8; Dimethyl:2H(4)(K)@9	missed K-K@8	0.00146232	1221.73	408.249	1221.72	408.249	3														1122.78	562.73	133.94
P00359	Glyceraldehyde-3-phosphate dehydrogenase 3	FVMGVNEEK	2	99	Dimethyl:2H(4)@N-term; Dimethyl:2H(4)(K)@9	cleaved M-F@N-term	-0.000670551	1115.61	558.814	1115.61	558.814	2														1105.56	0	0
P00359	Glyceraldehyde-3-phosphate dehydrogenase 3	FVMGVNEEK	0	99	Dimethyl:2H(4)@N-term; Dimethyl:2H(4)(K)@9	cleaved M-F@N-term	-0.000670551	1115.61	558.814	1115.61	558.814	2														1105.57	0	0
P00359	Glyceraldehyde-3-phosphate dehydrogenase 3	FVMGVNEEK	0	99	Dimethyl:2H(4)@N-term; Dimethyl:2H(4)(K)@9	cleaved M-F@N-term	-0.000670551	1115.61	558.814	1115.61	558.814	2														1105.5	0	0
P00359	Glyceraldehyde-3-phosphate dehydrogenase 3	VVITAPSSTAPMFVMGVNEEK	2	99	Dimethyl:2H(4)@N-term; Oxidation(M)@12; Dimethyl:2H(4)(K)@21		-0.00152024	2286.21	763.077	2286.21	763.077	3														580.93	374.39	132.79
P00359	Glyceraldehyde-3-phosphate dehydrogenase 3	VVITAPSSTAPMFVMGVNEEK	0	99	Dimethyl:2H(4)@N-term; Oxidation(M)@12; Dimethyl:2H(4)(K)@21		7.3e-05	2286.21	572.56	2286.21	572.56	4														240.66	24.83	36.36
P00359	Glyceraldehyde-3-phosphate dehydrogenase 3	VINDAFGIEEGLMTTVHSLTATQK	0	99	Dimethyl:2H(4)@N-term; Oxidation(M)@13; Dimethyl:2H(4)(K)@24		-0.0053715	2654.4	664.608	2654.41	664.609	4														255.88	0	0
P00359	Glyceraldehyde-3-phosphate dehydrogenase 3	VINDAFGIEEGLMTTVHSLTATQK	0	99	Dimethyl:2H(4)@N-term; Oxidation(M)@13; Dimethyl:2H(4)(K)@24		-0.0053715	2654.4	664.608	2654.41	664.609	4														255.88	0	0
P00359	Glyceraldehyde-3-phosphate dehydrogenase 3	VINDAFGIEEGLMTTVHSLTATQK	0	99	Dimethyl:2H(4)@N-term; Oxidation(M)@13; Dimethyl:2H(4)(K)@24		-0.0053715	2654.4	664.608	2654.41	664.609	4														255.86	0	0
P00359	Glyceraldehyde-3-phosphate dehydrogenase 3	VVITAPSSTAPMFVMGVNEEK	0	99	Dimethyl:2H(4)@N-term; Oxidation(M)@15; Dimethyl:2H(4)(K)@21		-0.00152024	2286.21	763.077	2286.21	763.077	3														580.93	375.14	129.62
P00359	Glyceraldehyde-3-phosphate dehydrogenase 3	FVMGVNEEK	0	99	Dimethyl:2H(4)@N-term; Oxidation(M)@3; Dimethyl:2H(4)(K)@9	cleaved M-F@N-term	-0.000634035	1131.61	566.811	1131.61	566.812	2														141.72	48.22	52.57
P00359	Glyceraldehyde-3-phosphate dehydrogenase 3	ETTYDEIKK	0	99	Dimethyl:2H(6)13C(2)@N-term; Dimethyl:2H(6)13C(2)(K)@8; Dimethyl:2H(6)13C(2)(K)@9	missed K-K@8	-0.000429001	1233.78	412.268	1233.78	412.268	3														1122.78	562.73	133.94
P00359	Glyceraldehyde-3-phosphate dehydrogenase 3	LTGMAFR	0	99	Dimethyl@N-term		-0.00713337	822.435	412.225	822.442	412.228	2														301.22	0	0
P00359	Glyceraldehyde-3-phosphate dehydrogenase 3	TASGNIIPSSTGAAK	0	99	Dimethyl@N-term; Dimethyl(K)@15		-0.00267921	1429.78	715.895	1429.78	715.896	2														4393.83	529.3	327.41
P00359	Glyceraldehyde-3-phosphate dehydrogenase 3	VDLVEHVAK	2	99	No Dimethyl@N-term; Dimethyl:2H(4)(K)@9	cleaved V-V@N-term	0.000817496	1040.62	521.316	1040.62	521.316	2														685.42	594.87	258.86
P00359	Glyceraldehyde-3-phosphate dehydrogenase 3	VDLVEHVAK	0	99	No Dimethyl@N-term; Dimethyl:2H(4)(K)@9	cleaved V-V@N-term	0.000817496	1040.62	521.316	1040.62	521.316	2														685.44	594.87	258.99
P34167	Eukaryotic translation initiation factor 4B	ADLVAVLK	2	99	Dimethyl:2H(4)@N-term; Dimethyl:2H(4)(K)@8		-0.00018187	891.624	446.819	891.624	446.82	2
P34167	Eukaryotic translation initiation factor 4B	EEYPVPDAPPYR	2	99	Dimethyl:2H(4)@N-term		1.01646	1464.74	733.377	1463.72	732.869	2
P34167	Eukaryotic translation initiation factor 4B	GGGADVDWSSAR	2	99	Dimethyl:2H(4)@N-term		0.0154737	1208.59	605.301	1208.57	605.293	2
P34167	Eukaryotic translation initiation factor 4B	TVYVSVAAPR	2	99	Dimethyl:2H(4)@N-term		-0.00252859	1093.64	547.828	1093.64	547.829	2
P34167	Eukaryotic translation initiation factor 4B	GSNFQGSSRPPR	2	99	Dimethyl:2H(4)@N-term		-0.00885873	1320.67	441.232	1320.68	441.235	3
P34167	Eukaryotic translation initiation factor 4B	GNAFVTLK	1	98	Dimethyl:2H(4)@N-term; Dimethyl:2H(4)(K)@8		0.0187268	912.607	457.311	912.588	457.301	2
P34167	Eukaryotic translation initiation factor 4B	GAQFGKPQQTK	1	98	Dimethyl:2H(4)@N-term; Dimethyl:2H(4)(K)@6; Dimethyl:2H(4)(K)@11		0.00227742	1284.8	429.273	1284.79	429.272	3
P34167	Eukaryotic translation initiation factor 4B	GSNFQSSSRPPRR	0	74	Dimethyl@N-term	missed R-R@12	-0.00317245	1502.77	376.699	1502.77	376.7	4
P34167	Eukaryotic translation initiation factor 4B	ADLVAVLK	0	17	Dimethyl:2H(4)@N-term; Dimethyl:2H(4)(K)@8		0.00151348	891.626	446.82	891.624	446.82	2
Q06287	Ribosomal RNA small subunit methyltransferase NEP1	ALPASLVPQAPPVLTSK	2	99	Dimethyl@N-term; Dimethyl(K)@17		0.00559682	1744.06	582.359	1744.05	582.357	3														0	0	189	89.02
Q06287	Ribosomal RNA small subunit methyltransferase NEP1	GILIEVNPTVR	1	97	Dimethyl@N-term		4.36e-05	1237.74	619.877	1237.74	619.877	2														0	0	668.81	179.53
P40364	Mitochondrial peculiar membrane protein 1	AIPPLPQLDFLLPLEEIK	2	99	Dimethyl@N-term; Dimethyl(K)@18		-0.00440712	2101.24	701.42	2101.24	701.422	3
P40364	Mitochondrial peculiar membrane protein 1	DLGDSALAMASGIPTVK	2	99	Dimethyl@N-term; Dimethyl(K)@17		0.00198528	1700.9	567.975	1700.9	567.975	3
P40364	Mitochondrial peculiar membrane protein 1	FATAPFWNLFPK	2	99	Dimethyl@N-term; Dimethyl(K)@12		0.0012185	1493.81	498.943	1493.81	498.943	3
P40364	Mitochondrial peculiar membrane protein 1	GFYEGDDNDANTK	0	58	Dimethyl@N-term; Dimethyl(K)@13	cleaved M-G@N-term	0.0640752	1500.7	501.241	1500.64	501.22	3
P40364	Mitochondrial peculiar membrane protein 1	FATAPFWNLFPK	0	85	Dimethyl@N-term; Deamidated(N)@8; Dimethyl(K)@12		0.0210007	1494.81	748.413	1494.79	748.403	2
P22141	Proteasome subunit beta type-4	EDYELSPQAVSSFVR	0	74	Dimethyl@N-term		0.0104419	1753.86	877.939	1753.85	877.933	2														0	0	534.27	160.36
P22141	Proteasome subunit beta type-4	EDYELSPQAVSSFVR	2	99	Dimethyl:2H(6)13C(2)@N-term		-0.001155	1761.9	881.955	1761.9	881.956	2														0	0	599.91	169.69
P22141	Proteasome subunit beta type-4	VQDSVILASSK	0	93	Dimethyl@N-term; Dimethyl(K)@11		-0.00238308	1201.69	601.852	1201.69	601.853	2														183.43	109.24	669.73	202.63
P22141	Proteasome subunit beta type-4	NKPELYQIDYLGTK	0	96	Dimethyl@N-term; Dimethyl(K)@2; Dimethyl(K)@14		-0.0167605	1764.95	589.324	1764.97	589.329	3														0	0	0	0
P00924	Enolase 1	AVDDFLISLDGTANK	0	99	Dimethyl@N-term; Dimethyl(K)@15		1.00009	1634.86	818.436	1633.86	817.935	2														0	0	13466.5	825.66
P00924	Enolase 1	TAGIQIVADDLTVTNPK	0	62	Dimethyl:2H(6)13C(2)@N-term; Deamidated(N)@15; Pro->pyro-Glu(P)@16; Dimethyl:2H(6)13C(2)(K)@17		0.0387312	1842.09	615.039	1842.06	615.026	3														484.99	166.86	4533.81	502.71
P00924	Enolase 1	TAGIQIVADDLTVTNPK	0	96	Dimethyl:2H(6)13C(2)@N-term; Deamidated(Q)@5; Deamidated(N)@15; Dimethyl:2H(6)13C(2)(K)@17		0.0370697	1829.1	610.707	1829.06	610.694	3														138.05	90.86	4535.72	502.87
P00924	Enolase 1	LNQLLR	0	78	Dimethyl:2H(4)@N-term; Deamidated(N)@2		0.0133877	788.519	395.267	788.506	395.26	2														6106.52	523.78	58.66	52.58
P00924	Enolase 1	LNQLLR	0	19	Dimethyl:2H(4)@N-term; Deamidated(N)@2		0.0133877	788.519	395.267	788.506	395.26	2														6106.52	523.78	58.66	52.58
P00924	Enolase 1	AVDDFLISLDGTANK	0	98	Dimethyl:2H(6)13C(2)@N-term; Deamidated(N)@14; Dimethyl:2H(6)13C(2)(K)@15		0.0244887	1650.95	826.484	1650.93	826.472	2														82.77	60.97	403.35	141.38
P00924	Enolase 1	VNQIGTLSESIK	0	99	Dimethyl@N-term; Deamidated(N)@2; Dimethyl(K)@12		0.0198489	1344.77	673.392	1344.75	673.382	2														163.31	123.23	39086.8	1688.44
P00924	Enolase 1	IEEELGDNAVFAGENFHHGDKL	0	99	Dimethyl:2H(6)13C(2)@N-term; Dimethyl:2H(6)13C(2)(K)@21	missed K-L@21	0.028616	2512.31	629.085	2512.28	629.078	4														0	0	11612.9	791.1
P00924	Enolase 1	TAGIQIVADDLTVTNPK	0	99	Dimethyl:2H(6)13C(2)@N-term; Deamidated(N)@15; Dimethyl:2H(6)13C(2)(K)@17		0.019389	1828.1	915.055	1828.08	915.046	2														125.56	84.79	11232.5	791.35
P00924	Enolase 1	IEEELGDNAVFAGENFHHGDKL	0	99	Dimethyl@N-term; Deamidated(N)@8; Dimethyl(K)@21	missed K-L@21	0.0216782	2497.2	625.307	2497.18	625.301	4														0	0	11091.7	773.68
P00924	Enolase 1	TSPYVLPVPFLN	0	65	Dimethyl:2H(6)13C(2)@N-term	cleaved N-V@C-term	0.0109845	1381.81	691.915	1381.8	691.909	2														26.91	24.18	325.42	97.05
P00924	Enolase 1	AVDDFLISLDGTANK	0	99	Dimethyl@N-term; Dimethyl(K)@15		0.0101656	1633.87	545.63	1633.86	545.626	3														5.73	16.52	433.32	134.97
P00924	Enolase 1	AVDDFLISLDGTANK	0	99	Dimethyl@N-term; Dimethyl(K)@15		0.0101656	1633.87	545.63	1633.86	545.626	3														5.77	16.26	433.32	135
P00924	Enolase 1	AVDDFLISLDGTANK	0	45	Dimethyl@N-term; Dimethyl(K)@15		0.00899015	1633.87	545.629	1633.86	545.626	3														0.8	12.25	203.51	94.54
P00924	Enolase 1	TSPYVLPVPFLNVLNGGSHAGGALALQEFMIAPTGAK	2	99	Dimethyl@N-term; Deamidated(N)@15; Dimethyl(K)@37		0.01998	3794.03	949.515	3794.01	949.51	4														0	0	418.02	113.38
P00924	Enolase 1	TSPYVLPVP	0	77	Dimethyl@N-term	cleaved P-F@C-term	0.00508775	999.569	500.792	999.564	500.789	2														558	145.98	3062.57	341.01
P00924	Enolase 1	AVDDFLISLDGTANK	0	99	Delta:H(2)C(2)@N-term; Dimethyl(K)@15		0.00772145	1631.85	544.957	1631.84	544.954	3														0	0	0	0
P00924	Enolase 1	IEEELGDNAVFAGENFHHGDK	2	99	Dimethyl:2H(6)13C(2)@N-term; Dimethyl:2H(6)13C(2)(K)@21		0.0110325	2399.21	600.809	2399.2	600.806	4														0	0	838.6	177.5
P00924	Enolase 1	IEEELGDNAVFAGENFHHGDKL	0	99	Dimethyl@N-term; Dimethyl(K)@21	missed K-L@21	0.0093499	2496.2	625.058	2496.19	625.055	4														0	0	12260.6	812.89
P00924	Enolase 1	IEEELGDNAVFAGENFHHGDKL	0	99	Dimethyl@N-term; Dimethyl(K)@21	missed K-L@21	0.00886162	2496.2	625.058	2496.19	625.055	4														0	0	11091.7	773.5
P00924	Enolase 1	NVNDVIAPAFVK	0	99	Dimethyl@N-term; Deamidated(N)@3; Dimethyl(K)@12		0.00424225	1342.75	672.384	1342.75	672.382	2														499.13	158.79	1032.58	230.61
P00924	Enolase 1	NVNDVIAPAFVK	0	99	Dimethyl@N-term; Deamidated(N)@3; Dimethyl(K)@12		0.00424225	1342.75	672.384	1342.75	672.382	2														499.13	158.77	1032.58	230.61
P00924	Enolase 1	GNPTVEVELTTEK	0	97	Dimethyl:2H(6)13C(2)@N-term; Dimethyl:2H(6)13C(2)(K)@13		0.00449639	1487.87	744.942	1487.87	744.94	2														49.72	78.09	412.3	173.22
P00924	Enolase 1	LNQLLR	0	52	Delta:H(2)C(2)@N-term		0.0023588	781.483	391.749	781.481	391.748	2
P00924	Enolase 1	IQTAEEALDLIVDAIK	0	99	Dimethyl:2H(6)13C(2)@N-term; Dimethyl:2H(6)13C(2)(K)@16	cleaved N-I@N-term	0.00512252	1813.11	605.376	1813.1	605.375	3														0	0	266.65	90.51
P00924	Enolase 1	TAGIQIVADDLTVTNPK	0	99	Dimethyl@N-term; Dimethyl(K)@17		0.00436867	1811.01	604.677	1811	604.675	3														117.88	80.03	12149	823.11
P00924	Enolase 1	SIVPSGASTGVHEALEMR	0	99	Dimethyl@N-term		0.00433559	1867.95	623.658	1867.95	623.656	3														4641.95	459.25	14418.7	809.29
P00924	Enolase 1	SIVPSGASTGVHEALEMR	0	99	Dimethyl@N-term		0.00433559	1867.95	623.658	1867.95	623.656	3														4641.95	459.25	14418.7	809.29
P00924	Enolase 1	AVDDFLISLDGTANK	0	99	Dimethyl@N-term; Dimethyl(K)@15		0.00357375	1633.86	545.627	1633.86	545.626	3														0	0	794.04	179.37
P00924	Enolase 1	AVDDFLISLDGTANK	0	99	Dimethyl@N-term; Dimethyl(K)@15		0.00349696	1633.86	545.627	1633.86	545.626	3														11.83	25.43	8554.75	657.98
P00924	Enolase 1	AVDDFLISLDGTANK	0	99	Dimethyl@N-term; Dimethyl(K)@15		0.00349696	1633.86	545.627	1633.86	545.626	3														8.56	25.31	8554.75	658.08
P00924	Enolase 1	VNQIGTLSESIK	0	99	Dimethyl@N-term; Dimethyl(K)@12		0.0023888	1343.77	672.891	1343.77	672.89	2														0	0	40654.6	1722.21
P00924	Enolase 1	YGASAGNVGDEGGVAPNIQTAEEALDLIVDAIK	2	99	Dimethyl@N-term; Dimethyl(K)@33		0.00586506	3312.68	1105.23	3312.67	1105.23	3														0	0	398.11	39.99
P00924	Enolase 1	VNQIGTLSESIK	2	99	Dimethyl@N-term; Dimethyl(K)@12		0.00226672	1343.77	672.891	1343.77	672.89	2														0	0	39086.8	1688.4
P00924	Enolase 1	VNQIGTLSESIK	0	99	Dimethyl@N-term; Dimethyl(K)@12		0.00226672	1343.77	672.891	1343.77	672.89	2														0	0	39086.8	1688.41
P00924	Enolase 1	VNQIGTLSESIK	0	99	Dimethyl@N-term; Dimethyl(K)@12		0.00226672	1343.77	672.891	1343.77	672.89	2														0	0	39086.8	1688.48
P00924	Enolase 1	VNQIGTLSESIK	0	99	Dimethyl@N-term; Dimethyl(K)@12		0.00226672	1343.77	672.891	1343.77	672.89	2														0	0	39086.8	1688.48
P00924	Enolase 1	LGANAILGVSLAASR	0	99	Dimethyl:2H(6)13C(2)@N-term		0.00227813	1447.89	724.954	1447.89	724.952	2														19716.9	927.78	892.66	198.57
P00924	Enolase 1	LGANAILGVSLAASR	0	66	Dimethyl:2H(6)13C(2)@N-term		0.00227813	1447.89	724.954	1447.89	724.952	2														19716.9	927.74	892.66	198.78
P00924	Enolase 1	GNPTVEVELTTEK	2	99	Dimethyl@N-term; Dimethyl(K)@13		0.00211426	1471.78	736.897	1471.78	736.896	2														51.09	49.12	15866.9	1789.16
P00924	Enolase 1	GNPTVEVELTTEK	0	99	Dimethyl@N-term; Dimethyl(K)@13		0.00211426	1471.78	736.897	1471.78	736.896	2														51.09	48.69	15866.9	1789
P00924	Enolase 1	GNPTVEVELTTEK	0	99	Dimethyl@N-term; Dimethyl(K)@13		0.00211426	1471.78	736.897	1471.78	736.896	2														0	0	14047.3	1682.82
P00924	Enolase 1	LNVLNGGSHAGGALALQEFMIAPTGAK	2	99	Dimethyl:2H(6)13C(2)@N-term; Deamidated(N)@5; Dimethyl:2H(6)13C(2)(K)@27	cleaved F-L@N-term	0.00346303	2709.51	904.178	2709.51	904.177	3														107.61	50.85	1004.99	160.4
P00924	Enolase 1	IEEELGDNAVFAGENFHHGDKL	0	99	Dimethyl:2H(6)13C(2)@N-term; Dimethyl:2H(6)13C(2)(K)@21	missed K-L@21	0.00276256	2512.28	838.435	2512.28	838.434	3														22.38	34.17	5127.49	525.7
P00924	Enolase 1	IEEELGDNAVFAGENFHHGDKL	0	73	Dimethyl:2H(6)13C(2)@N-term; Dimethyl:2H(6)13C(2)(K)@21	missed K-L@21	0.00276256	2512.28	838.435	2512.28	838.434	3														21.33	35.35	5127.49	525.71
P00924	Enolase 1	IEEELGDNAVFAGENFHHGDKL	2	99	Dimethyl@N-term; Dimethyl(K)@21	missed K-L@21	0.00246844	2496.19	833.072	2496.19	833.071	3														24.57	35.52	4864.4	512.3
P00924	Enolase 1	IEEELGDNAVFAGENFHHGDKL	0	99	Dimethyl@N-term; Dimethyl(K)@21	missed K-L@21	0.00246844	2496.19	833.072	2496.19	833.071	3														23.41	36.76	4864.4	512.3
P00924	Enolase 1	IEEELGDNAVFAGENFHHGDKL	0	89	Dimethyl@N-term; Dimethyl(K)@21	missed K-L@21	0.00246844	2496.19	833.072	2496.19	833.071	3														23.41	36.76	4864.4	512.3
P00924	Enolase 1	AVDDFLISLDGTANK	0	99	Dimethyl:2H(6)13C(2)@N-term; Dimethyl:2H(6)13C(2)(K)@15		0.00158371	1649.95	550.99	1649.95	550.989	3														11.83	25.43	8554.75	657.98
P00924	Enolase 1	AVDDFLISLDGTANK	0	99	Dimethyl:2H(6)13C(2)@N-term; Dimethyl:2H(6)13C(2)(K)@15		0.00158371	1649.95	550.99	1649.95	550.989	3														9.56	23.59	8554.75	658.09
P00924	Enolase 1	AVDDFLISLDGTANK	0	99	Dimethyl:2H(6)13C(2)@N-term; Dimethyl:2H(6)13C(2)(K)@15		0.00158371	1649.95	550.99	1649.95	550.989	3														8.56	25.34	8554.75	658.08
P00924	Enolase 1	AVDDFLISLDGTANK	0	99	Dimethyl:2H(6)13C(2)@N-term; Dimethyl:2H(6)13C(2)(K)@15		0.00152481	1649.95	825.981	1649.95	825.98	2														315.93	112.7	872.88	191.59
P00924	Enolase 1	AVDDFLISLDGTANK	0	36	Dimethyl:2H(6)13C(2)@N-term; Dimethyl:2H(6)13C(2)(K)@15		0.00152481	1649.95	825.981	1649.95	825.98	2														315.93	112.98	872.88	191.79
P00924	Enolase 1	SIVPSGASTGVHEALEMR	0	99	No Dimethyl@N-term		0.00165297	1839.92	614.313	1839.91	614.312	3
P00924	Enolase 1	DGKYDLDFKNPNSDK	0	45	Dimethyl@N-term; Dimethyl(K)@3; Dimethyl(K)@9; Dimethyl(K)@15	missed K-Y@3; missed K-N@9	0.00156816	1866.94	623.32	1866.94	623.319	3
P00924	Enolase 1	TAGIQIVADDLTVTNPK	0	99	Dimethyl:2H(6)13C(2)@N-term; Dimethyl:2H(6)13C(2)(K)@17		0.00136469	1827.09	610.039	1827.09	610.038	3														162.84	93.69	12446.4	832.94
P00924	Enolase 1	IGSEVYHNLK	0	99	Dimethyl@N-term; Dimethyl(K)@10		0.000895445	1214.67	405.896	1214.67	405.896	3														17.94	24.39	5982.84	470.77
P00924	Enolase 1	YGASAGNVGDEGGVAPNIQTAEEALDLIVDAIK	0	99	Dimethyl:2H(6)13C(2)@N-term; Dimethyl:2H(6)13C(2)(K)@33		0.00193897	3328.76	1110.6	3328.76	1110.59	3														0	0	398.11	39.99
P00924	Enolase 1	AVDDFLISLDGTANK	0	99	Dimethyl@N-term; Dimethyl(K)@15		0.000937681	1633.86	817.936	1633.86	817.935	2														189.6	87.26	10035.4	647.08
P00924	Enolase 1	AVDDFLISLDGTANK	0	99	Dimethyl@N-term; Dimethyl(K)@15		0.000937681	1633.86	817.936	1633.86	817.935	2														189.6	87.26	10035.4	647.31
P00924	Enolase 1	AVDDFLISLDGTANK	0	99	Dimethyl@N-term; Dimethyl(K)@15		0.000937681	1633.86	817.936	1633.86	817.935	2														0	0	13466.5	825.74
P00924	Enolase 1	AVDDFLISLDGTANK	0	99	Dimethyl@N-term; Dimethyl(K)@15		0.000937681	1633.86	817.936	1633.86	817.935	2														0	0	13466.5	825.73
P00924	Enolase 1	YDLDFK	0	94	Dimethyl@N-term; Dimethyl(K)@6		0.000459219	855.438	428.726	855.438	428.726	2														0	0	7207.11	617.62
P00924	Enolase 1	SGETEDTFIADLVVGLR	0	99	Dimethyl@N-term		0.000905485	1848.95	925.481	1848.95	925.481	2														272.19	75.61	639.25	115.81
P00924	Enolase 1	SGETEDTFIADLVVGLR	0	99	Dimethyl@N-term		0.000905485	1848.95	925.481	1848.95	925.481	2														272.19	75.61	639.25	115.89
P00924	Enolase 1	GNPTVEVELTTEK	0	99	Dimethyl:2H(6)13C(2)@N-term; Dimethyl:2H(6)13C(2)(K)@13		0.000712167	1487.87	744.941	1487.87	744.94	2														86.54	62.44	17843.8	1896.6
P00924	Enolase 1	GNPTVEVELTTEK	0	99	Dimethyl:2H(6)13C(2)@N-term; Dimethyl:2H(6)13C(2)(K)@13		0.000712167	1487.87	744.941	1487.87	744.94	2														69.8	56.54	17843.8	1896.61
P00924	Enolase 1	GNPTVEVELTTEK	0	99	Dimethyl:2H(6)13C(2)@N-term; Dimethyl:2H(6)13C(2)(K)@13		0.000712167	1487.87	744.941	1487.87	744.94	2														89.09	63.79	17843.8	1896.69
P00924	Enolase 1	AVDDFLISLDGTANK	0	99	Dimethyl@N-term; Dimethyl(K)@15		0.000672808	1633.86	817.936	1633.86	817.935	2														247.85	100.14	799.04	183.43
P00924	Enolase 1	AVDDFLISLDGTANK	0	99	Dimethyl@N-term; Dimethyl(K)@15		0.000672808	1633.86	817.936	1633.86	817.935	2														247.85	100.26	799.04	183.53
P00924	Enolase 1	GNPTVEVELTTEK	0	99	Dimethyl:2H(6)13C(2)@N-term; Dimethyl:2H(6)13C(2)(K)@13		0.000590095	1487.87	744.94	1487.87	744.94	2														0	0	18910.8	1017.61
P00924	Enolase 1	VNQIGTLSESIK	0	99	Dimethyl@N-term; Deamidated(N)@2; Dimethyl(K)@12		0.000503616	1344.75	673.383	1344.75	673.382	2														429.06	159.65	2234.23	395.02
P00924	Enolase 1	YDLDFKNPNSDK	2	98	Dimethyl:2H(6)13C(2)@N-term; Dimethyl:2H(6)13C(2)(K)@6; Dimethyl:2H(6)13C(2)(K)@12	missed K-N@6	0.00056708	1562.9	521.972	1562.89	521.972	3														0	0	1164.61	355.71
P00924	Enolase 1	TAEEALDLIVDAIK	0	98	Dimethyl@N-term; Dimethyl(K)@14	cleaved Q-T@N-term	0.000437298	1555.87	778.943	1555.87	778.943	2														205.86	59.12	585.05	96.84
P00924	Enolase 1	SGETEDTFIADLVVGLR	0	98	Dimethyl:2H(6)13C(2)@N-term		0.000161027	1856.99	929.503	1856.99	929.503	2														272.19	75.61	639.25	115.91
P00924	Enolase 1	SGETEDTFIADLVVGLR	0	29	Dimethyl:2H(6)13C(2)@N-term		0.000161027	1856.99	929.503	1856.99	929.503	2														272.19	75.64	639.25	116.11
P00924	Enolase 1	TFAEALR	0	97	Dimethyl:2H(6)13C(2)@N-term		-1.08e-05	842.504	422.259	842.504	422.259	2														688.24	166.83	12349.4	715.78
P00924	Enolase 1	TFAEALR	0	18	Dimethyl:2H(6)13C(2)@N-term		-1.08e-05	842.504	422.259	842.504	422.259	2														723.87	170.78	12349.4	715.94
P00924	Enolase 1	VNQIGTLSESIK	0	99	Dimethyl:2H(6)13C(2)@N-term; Deamidated(N)@2; Dimethyl:2H(6)13C(2)(K)@12		-0.000123851	1360.84	681.427	1360.84	681.427	2														1024.73	230.05	1630.69	278.16
P00924	Enolase 1	LGANAILGVSLAASR	2	99	Dimethyl@N-term		-0.000404012	1439.85	720.93	1439.85	720.93	2														19716.9	927.77	892.66	198.68
P00924	Enolase 1	SIVPSGASTGVHEALEMR	0	99	Dimethyl:2H(6)13C(2)@N-term		-0.000557145	1875.99	626.337	1875.99	626.337	3														4641.95	459.25	14418.7	809.29
P00924	Enolase 1	SIVPSGASTGVHEALEMR	0	99	Dimethyl:2H(6)13C(2)@N-term		-0.000557145	1875.99	626.337	1875.99	626.337	3														4641.95	459.53	14418.7	809.49
P00924	Enolase 1	SIVPSGASTGVHEALEMR	0	99	Dimethyl@N-term		-0.00057182	1867.95	934.98	1867.95	934.98	2														476.17	147.39	1449.79	249.71
P00924	Enolase 1	IGSEVYHNLK	0	98	Dimethyl:2H(6)13C(2)@N-term; Dimethyl:2H(6)13C(2)(K)@10		-0.000540406	1230.75	411.259	1230.75	411.259	3														0	0	9955.4	601.75
P00924	Enolase 1	IGSEVYHNLK	0	96	Dimethyl:2H(6)13C(2)@N-term; Dimethyl:2H(6)13C(2)(K)@10		-0.000540406	1230.75	411.259	1230.75	411.259	3														0	0	9955.4	601.78
P00924	Enolase 1	LNQLLR	2	99	Dimethyl@N-term		-0.000352768	783.496	392.755	783.497	392.756	2														50.22	44.52	11755.2	622.01
P00924	Enolase 1	LNQLLR	0	54	Dimethyl@N-term		-0.000352768	783.496	392.755	783.497	392.756	2														25.46	37.43	11235.4	608.52
P00924	Enolase 1	AVDDFLISLDGTANK	0	99	Delta:H(2)C(2)@N-term; Dimethyl(K)@15		-0.000881915	1631.84	816.927	1631.84	816.928	2														323.46	104.26	22.54	29.71
P00924	Enolase 1	TFAEALR	2	98	Dimethyl@N-term		-0.000499158	834.459	418.237	834.46	418.237	2														727	171.32	10794.7	670.38
P00924	Enolase 1	LGANAILGVSLAASR	0	94	No Dimethyl@N-term		-0.000911693	1411.81	706.914	1411.81	706.915	2
P00924	Enolase 1	AADALLLK	0	99	Dimethyl:2H(6)13C(2)@N-term; Dimethyl:2H(6)13C(2)(K)@8		-0.000608032	885.647	443.831	885.647	443.831	2														242.85	118.47	35406.9	1453.55
P00924	Enolase 1	AADALLLK	0	99	Dimethyl:2H(6)13C(2)@N-term; Dimethyl:2H(6)13C(2)(K)@8		-0.000608032	885.647	443.831	885.647	443.831	2														242.85	118.47	35406.9	1453.55
P00924	Enolase 1	AADALLLK	0	99	Dimethyl:2H(6)13C(2)@N-term; Dimethyl:2H(6)13C(2)(K)@8		-0.000608032	885.647	443.831	885.647	443.831	2														242.85	118.43	35406.9	1453.54
P00924	Enolase 1	AADALLLK	0	99	Dimethyl:2H(6)13C(2)@N-term; Dimethyl:2H(6)13C(2)(K)@8		-0.000608032	885.647	443.831	885.647	443.831	2														242.85	118.48	35406.9	1453.54
P00924	Enolase 1	AADALLLK	0	97	Dimethyl:2H(6)13C(2)@N-term; Dimethyl:2H(6)13C(2)(K)@8		-0.000608032	885.647	443.831	885.647	443.831	2														242.85	118.47	35406.9	1453.55
P00924	Enolase 1	AVDDFLISLDGTANK	0	99	Dimethyl:2H(6)13C(2)@N-term; Dimethyl:2H(6)13C(2)(K)@15		-0.00114613	1649.94	825.979	1649.95	825.98	2														205.17	91.12	11274.6	684.83
P00924	Enolase 1	AVDDFLISLDGTANK	0	99	Dimethyl:2H(6)13C(2)@N-term; Dimethyl:2H(6)13C(2)(K)@15		-0.00114613	1649.94	825.979	1649.95	825.98	2														246.52	99.51	12217.2	699.52
P00924	Enolase 1	VNQIGTLSESIK	0	98	Dimethyl:2H(6)13C(2)@N-term; Deamidated(N)@2; Dimethyl:2H(6)13C(2)(K)@12		-0.000978349	1360.84	681.426	1360.84	681.427	2														380.47	150.5	2397.99	409.02
P00924	Enolase 1	TAGIQIVADDLTVTNPK	0	71	Dimethyl:2H(6)13C(2)@N-term; Dimethyl:2H(6)13C(2)(K)@17		-0.00136357	1827.09	914.553	1827.09	914.554	2														119.37	82.7	10012.4	756.53
P00924	Enolase 1	TAGIQIVADDLTVTNPK	2	99	Dimethyl@N-term; Dimethyl(K)@17		-0.00136436	1811	906.509	1811	906.509	2														125.56	84.72	11232.5	791.35
P00924	Enolase 1	TAGIQIVADDLTVTNPK	0	99	Dimethyl@N-term; Dimethyl(K)@17		-0.00136436	1811	906.509	1811	906.509	2														125.56	84.83	11232.5	791.39
P00924	Enolase 1	NVNDVIAPAFVK	0	99	Dimethyl@N-term; Dimethyl(K)@12		-0.00107383	1341.76	448.262	1341.77	448.262	3														0	0	566.42	160.8
P00924	Enolase 1	IQTAEEALDLIVDAIK	0	99	Dimethyl:2H(6)13C(2)@N-term; Dimethyl:2H(6)13C(2)(K)@16	cleaved N-I@N-term	-0.00146657	1813.1	907.558	1813.1	907.558	2														0	0	458.05	118.62
P00924	Enolase 1	HLADLSK	0	99	Dimethyl@N-term; Dimethyl(K)@7		-0.000690487	838.491	420.253	838.491	420.253	2														68.68	25.7	195.62	40.92
P00924	Enolase 1	HLADLSK	0	99	Dimethyl@N-term; Dimethyl(K)@7		-0.000690487	838.491	420.253	838.491	420.253	2														68.68	25.7	195.62	40.92
P00924	Enolase 1	SGETEDTFIADLVVGLR	2	99	No Dimethyl@N-term		-0.00152569	1820.91	911.464	1820.92	911.465	2
P00924	Enolase 1	IATAIEK	2	99	Dimethyl:2H(6)13C(2)@N-term; Dimethyl:2H(6)13C(2)(K)@7		-0.000700359	816.589	409.302	816.589	409.302	2														91.98	38.21	11266.5	392.67
P00924	Enolase 1	IATAIEK	0	99	Dimethyl:2H(6)13C(2)@N-term; Dimethyl:2H(6)13C(2)(K)@7		-0.000700359	816.589	409.302	816.589	409.302	2														91.98	38.21	11266.5	392.62
P00924	Enolase 1	DGKYDLDFK	1	94	Dimethyl@N-term; Dimethyl(K)@3; Dimethyl(K)@9	missed K-Y@3	-0.00102272	1183.61	395.544	1183.61	395.545	3														0	0	4058.7	642.41
P00924	Enolase 1	TAGIQIVADDLTVTNPK	0	99	Dimethyl:2H(6)13C(2)@N-term; Dimethyl:2H(6)13C(2)(K)@17		-0.00160772	1827.09	914.553	1827.09	914.554	2														117.82	82.19	11405.6	797.32
P00924	Enolase 1	TAGIQIVADDLTVTNPK	0	99	Dimethyl:2H(6)13C(2)@N-term; Dimethyl:2H(6)13C(2)(K)@17		-0.00160772	1827.09	914.553	1827.09	914.554	2														117.82	82.18	11405.6	797.32
P00924	Enolase 1	TAGIQIVADDLTVTNPK	0	75	Dimethyl:2H(6)13C(2)@N-term; Dimethyl:2H(6)13C(2)(K)@17		-0.00160772	1827.09	914.553	1827.09	914.554	2														117.82	82.23	11405.6	797.36
P00924	Enolase 1	SIVPSGASTGVHEALEMR	0	99	Dimethyl:2H(4)@N-term		-0.00176512	1871.97	624.997	1871.97	624.998	3														4641.95	459.28	14418.7	809.28
P00924	Enolase 1	SIVPSGASTGVHEALEMR	0	99	Dimethyl:2H(6)13C(2)@N-term		-0.00179621	1875.99	939.002	1875.99	939.003	2														460.35	144.99	1471.12	251.5
P00924	Enolase 1	VNQIGTLSESIK	0	99	Delta:H(2)C(2)@N-term; Dimethyl(K)@12		-0.00137501	1341.75	671.882	1341.75	671.882	2														6911.07	573.27	175.15	91.49
P00924	Enolase 1	IATAIEK	0	99	Dimethyl@N-term; Dimethyl(K)@7		-0.000879744	800.5	401.257	800.501	401.258	2														226.13	53.7	6207.43	300.08
P00924	Enolase 1	NVNDVIAPAFVK	0	99	Dimethyl:2H(6)13C(2)@N-term; Deamidated(N)@3; Dimethyl:2H(6)13C(2)(K)@12		-0.00163546	1358.84	680.426	1358.84	680.426	2														494.74	153.38	1266.85	254.87
P00924	Enolase 1	SGETEDTFIADLVVGLR	0	99	Dimethyl:2H(6)13C(2)@N-term		-0.00225278	1856.99	620.004	1856.99	620.004	3														113.27	48.78	403.76	91.96
P00924	Enolase 1	AVDDFLISLDGTANK	0	99	Dimethyl:2H(6)13C(2)@N-term; Dimethyl:2H(6)13C(2)(K)@15		-0.00213733	1649.94	825.979	1649.95	825.98	2														0	0	1207.38	221.16
P00924	Enolase 1	AADALLLK	0	99	Delta:H(2)C(2)@N-term; Dimethyl(K)@8		-0.00115148	867.542	434.778	867.543	434.779	2														52.54	50.24	0	0
P00924	Enolase 1	TAEEALDLIVDAIK	2	99	Dimethyl:2H(6)13C(2)@N-term; Dimethyl:2H(6)13C(2)(K)@14	cleaved Q-T@N-term	-0.00215467	1571.96	786.986	1571.96	786.987	2														205.86	59.12	585.05	96.81
P00924	Enolase 1	TAEEALDLIVDAIK	0	90	Dimethyl:2H(6)13C(2)@N-term; Dimethyl:2H(6)13C(2)(K)@14	cleaved Q-T@N-term	-0.00215467	1571.96	786.986	1571.96	786.987	2														205.86	59.12	585.05	96.84
P00924	Enolase 1	NVNDVIAPAFVK	0	99	Dimethyl:2H(6)13C(2)@N-term; Dimethyl:2H(6)13C(2)(K)@12		-0.00187888	1357.85	679.933	1357.85	679.934	2														0	0	21170	968.15
P00924	Enolase 1	NVNDVIAPAFVK	0	99	Dimethyl:2H(6)13C(2)@N-term; Dimethyl:2H(6)13C(2)(K)@12		-0.00187888	1357.85	679.933	1357.85	679.934	2														183.36	91.66	21170	968.15
P00924	Enolase 1	NVNDVIAPAFVK	0	99	Dimethyl:2H(6)13C(2)@N-term; Dimethyl:2H(6)13C(2)(K)@12		-0.00187888	1357.85	679.933	1357.85	679.934	2														0	0	21170	968.15
P00924	Enolase 1	AVDDFLISLDGTANK	0	63	Dimethyl:2H(6)13C(2)@N-term; Dimethyl:2H(6)13C(2)(K)@15		-0.00236394	1649.94	550.988	1649.95	550.989	3														0	0	847.29	185.3
P00924	Enolase 1	AVDDFLISLDGTANK	0	99	Dimethyl:2H(6)13C(2)@N-term; Dimethyl:2H(6)13C(2)(K)@15		-0.00236685	1649.94	825.979	1649.95	825.98	2														67.17	53.21	3625.14	408.99
P00924	Enolase 1	KAADALLLK	2	99	Dimethyl@N-term; Dimethyl(K)@1; Dimethyl(K)@9	missed K-A@1	-0.00153799	1025.68	513.849	1025.68	513.85	2														0	0	1768.19	266.22
P00924	Enolase 1	KAADALLLK	0	99	Dimethyl@N-term; Dimethyl(K)@1; Dimethyl(K)@9	missed K-A@1	-0.00153799	1025.68	513.849	1025.68	513.85	2														0	0	1768.19	266.21
P00924	Enolase 1	KAADALLLK	0	99	Dimethyl@N-term; Dimethyl(K)@1; Dimethyl(K)@9	missed K-A@1	-0.00153799	1025.68	513.849	1025.68	513.85	2														0	0	1768.19	266.2
P00924	Enolase 1	SIVPSGASTGVHEALEMR	0	63	Dimethyl@N-term; Oxidation(M)@17		-0.00296014	1883.94	628.987	1883.94	628.988	3														520.85	161.24	1682.89	275.01
P00924	Enolase 1	AVDDFLISLDGTANK	0	99	Dimethyl:2H(6)13C(2)@N-term; Dimethyl:2H(6)13C(2)(K)@15		-0.00273306	1649.94	825.979	1649.95	825.98	2														18.38	31.59	462.31	133.89
P00924	Enolase 1	NVNDVIAPAFVK	2	99	Dimethyl@N-term; Dimethyl(K)@12		-0.00222677	1341.76	671.889	1341.77	671.89	2														253.19	107.42	11032	706.15
P00924	Enolase 1	NVNDVIAPAFVK	0	99	Dimethyl@N-term; Dimethyl(K)@12		-0.00222677	1341.76	671.889	1341.77	671.89	2														399.65	132.17	11032	706.13
P00924	Enolase 1	AVDDFLISLDGTANK	0	99	Dimethyl@N-term; Dimethyl(K)@15		-0.00272867	1633.85	545.625	1633.86	545.626	3														149.45	77.72	6204.25	508.78
P00924	Enolase 1	AVDDFLISLDGTANK	0	99	Dimethyl@N-term; Dimethyl(K)@15		-0.00272867	1633.85	545.625	1633.86	545.626	3														159.96	80.14	6295.07	512.38
P00924	Enolase 1	VNQIGTLSESIK	0	99	Dimethyl:2H(6)13C(2)@N-term; Dimethyl:2H(6)13C(2)(K)@12		-0.00231508	1359.85	680.933	1359.85	680.935	2														0	0	40681.1	1722.05
P00924	Enolase 1	VNQIGTLSESIK	0	99	Dimethyl:2H(6)13C(2)@N-term; Dimethyl:2H(6)13C(2)(K)@12		-0.00231508	1359.85	680.933	1359.85	680.935	2														0	0	40681.1	1722.02
P00924	Enolase 1	KAADALLLK	0	27	Dimethyl:2H(6)13C(2)@N-term; Dimethyl:2H(6)13C(2)(K)@1; Dimethyl:2H(6)13C(2)(K)@9	missed K-A@1	-0.00188633	1049.82	525.915	1049.82	525.916	2														0	0	2078.73	287.99
P00924	Enolase 1	TSPYVLPVPFLNVLNGGSHAGGALALQEFMIAPTGAK	0	99	Dimethyl:2H(6)13C(2)@N-term; Deamidated(N)@15; Dimethyl:2H(6)13C(2)(K)@37		-0.00689907	3810.09	953.531	3810.1	953.532	4														0	0	434.37	115.5
P00924	Enolase 1	YDLDFK	2	98	Dimethyl:2H(6)13C(2)@N-term; Dimethyl:2H(6)13C(2)(K)@6		-0.00159226	871.525	436.77	871.527	436.771	2														0	0	9810.1	718.08
P00924	Enolase 1	IGSEVYHNLK	2	99	Dimethyl@N-term; Dimethyl(K)@10		-0.00227124	1214.66	608.339	1214.67	608.34	2														66.78	43.34	2500.75	301.66
P00924	Enolase 1	IGLDCASSEFFK	0	99	Dimethyl:2H(6)13C(2)@N-term; Carbamidomethyl(C)@5; Dimethyl:2H(6)13C(2)(K)@12		-0.00272102	1444.78	723.398	1444.78	723.4	2														395.54	132.41	9182.43	635.37
P00924	Enolase 1	IGLDCASSEFFK	0	99	Dimethyl:2H(6)13C(2)@N-term; Carbamidomethyl(C)@5; Dimethyl:2H(6)13C(2)(K)@12		-0.00272102	1444.78	723.398	1444.78	723.4	2														395.54	132.41	9182.43	635.43
P00924	Enolase 1	IGLDCASSEFFK	2	99	Dimethyl@N-term; Carbamidomethyl(C)@5; Dimethyl(K)@12		-0.00271399	1428.69	715.354	1428.7	715.355	2														239.67	104.11	7725.15	584.11
P00924	Enolase 1	IGLDCASSEFFK	0	99	Dimethyl@N-term; Carbamidomethyl(C)@5; Dimethyl(K)@12		-0.00271399	1428.69	715.354	1428.7	715.355	2														239.67	104.1	7725.15	584.04
P00924	Enolase 1	IGLDCASSEFFK	0	71	Dimethyl@N-term; Carbamidomethyl(C)@5; Dimethyl(K)@12		-0.00271399	1428.69	715.354	1428.7	715.355	2														251.44	106.64	7974.52	593.36
P00924	Enolase 1	GNPTVEVELTTEK	0	99	Dimethyl@N-term; Dimethyl(K)@13		-0.00313482	1471.77	736.894	1471.78	736.896	2														0	0	2723.53	741.08
P00924	Enolase 1	EEALDLIVDAIK	0	92	Dimethyl@N-term; Dimethyl(K)@12	cleaved A-E@N-term	-0.00310396	1383.78	692.899	1383.79	692.9	2														17.07	20.76	245.22	75.53
P00924	Enolase 1	GVLHAVK	0	99	Dimethyl:2H(6)13C(2)@N-term; Dimethyl:2H(6)13C(2)(K)@7		-0.00178765	794.593	398.304	794.595	398.305	2														10.87	8.2	398.33	40.04
P00924	Enolase 1	IQTAEEALDLIVDAIK	2	99	Dimethyl@N-term; Dimethyl(K)@16	cleaved N-I@N-term	-0.00424948	1797.01	899.512	1797.01	899.514	2														0	0	458.05	118.62
P00924	Enolase 1	LNQLLR	0	38	Dimethyl:2H(6)13C(2)@N-term		-0.00188044	791.539	396.777	791.541	396.778	2														24.73	36.94	12974.6	652.39
P00924	Enolase 1	HLADLSK	0	99	Dimethyl:2H(6)13C(2)@N-term; Dimethyl:2H(6)13C(2)(K)@7		-0.00233983	854.578	428.296	854.58	428.297	2														73.45	24.21	5169.38	189.51
P00924	Enolase 1	NVPLYK	1	93	Dimethyl@N-term; Dimethyl(K)@6		-0.00231351	788.477	395.246	788.48	395.247	2														270.35	92.08	7121.42	468.05
P00924	Enolase 1	NVPLYK	0	75	Dimethyl@N-term; Dimethyl(K)@6		-0.00231351	788.477	395.246	788.48	395.247	2														270.35	92.03	7121.42	468.01
P00924	Enolase 1	NVPLYK	0	70	Dimethyl@N-term; Dimethyl(K)@6		-0.00231351	788.477	395.246	788.48	395.247	2														270.35	92.06	7121.42	468.01
P00924	Enolase 1	LGANAILGVSLAASR	0	99	Dimethyl:2H(6)13C(2)@N-term; Deamidated(N)@4		-0.00431374	1448.87	725.442	1448.87	725.444	2														105.56	75.58	945.31	212.08
P00924	Enolase 1	NVNDVIAPAFVK	0	99	Dimethyl:2H(6)13C(2)@N-term; Deamidated(N)@3; Dimethyl:2H(6)13C(2)(K)@12		-0.00407688	1358.83	680.424	1358.84	680.426	2														194.34	94.49	2699.51	340.56
P00924	Enolase 1	NVPLYK	0	55	Dimethyl:2H(6)13C(2)@N-term; Dimethyl:2H(6)13C(2)(K)@6		-0.0024995	804.566	403.29	804.568	403.291	2														243.61	87.55	10367.2	560.46
P00924	Enolase 1	NVPLYK	0	53	Dimethyl:2H(6)13C(2)@N-term; Dimethyl:2H(6)13C(2)(K)@6		-0.0024995	804.566	403.29	804.568	403.291	2														243.61	87.77	10367.2	560.46
P00924	Enolase 1	GVLHAVK	2	99	Dimethyl@N-term; Dimethyl(K)@7		-0.00257595	778.504	390.259	778.507	390.261	2														11.02	8.23	364.57	38.42
P00924	Enolase 1	NVPLYK	0	71	Dimethyl:2H(6)13C(2)@N-term; Dimethyl:2H(6)13C(2)(K)@6		-0.00274365	804.566	403.29	804.568	403.291	2														265.92	96.75	4977.42	417.55
P00924	Enolase 1	TSPYVLPVPF	0	71	Dimethyl:2H(6)13C(2)@N-term	cleaved F-L@C-term	-0.00479379	1154.67	578.343	1154.68	578.346	2														23.23	24.31	2352.59	246.64
P00924	Enolase 1	IGSEVYHNLK	0	99	Dimethyl:2H(6)13C(2)@N-term; Dimethyl:2H(6)13C(2)(K)@10		-0.00530286	1230.75	616.382	1230.75	616.385	2														66.78	43.34	2500.75	301.66
P00924	Enolase 1	TAGIQIVADDLTVTNPK	0	58	Dimethyl@N-term; Dimethyl(K)@17		-0.0151584	1810.99	906.502	1811	906.509	2														0	0	0	0
P00924	Enolase 1	TAGIQIVADDLTVTNPK	0	99	Delta:H(2)C(2)@N-term; Dimethyl(K)@17		-0.0171495	1808.97	905.493	1808.99	905.501	2														0	0	0	0
P00924	Enolase 1	TAGIQIVADDLTVTNPK	0	56	Dimethyl@N-term; Didehydro(T)@14; Dimethyl(K)@17		-0.0205192	1808.97	905.491	1808.99	905.501	2														0	0	117.57	85.38
P00924	Enolase 1	AVDDFLISLDGTANK	2	99	Dimethyl@N-term; Dimethyl(K)@15		-0.0213	1633.84	817.925	1633.86	817.935	2														0	0	176.49	91.13
P00924	Enolase 1	TAGIQIVADDLTVTNPK	0	97	Dimethyl:2H(6)13C(2)@N-term; Dehydrated(T)@1; Dimethyl:2H(6)13C(2)(K)@17		-0.0238902	1809.06	905.536	1809.08	905.548	2														27848.6	1259.31	1158.96	229.36
P00924	Enolase 1	SIVPSGASTGVHEALEMR	2	99	Dimethyl:2H(4)@N-term; Dehydrated(S)@1		-0.0281137	1853.93	618.985	1853.96	618.994	3														1203.48	225.65	1556.82	256.66
P00924	Enolase 1	AADALLLK	2	99	Dimethyl@N-term; Dimethyl(K)@8		-0.0180283	869.541	435.778	869.559	435.787	2														236.66	116.98	22702.8	1169.38
P00924	Enolase 1	AADALLLK	0	99	Dimethyl@N-term; Dimethyl(K)@8		-0.0180283	869.541	435.778	869.559	435.787	2														236.66	116.98	22702.8	1169.37
P00924	Enolase 1	TAGIQIVADDLTVTNPK	0	99	Dimethyl:2H(6)13C(2)@N-term; Dimethyl:2H(6)13C(2)(K)@17		-1.04601	1826.05	609.689	1827.09	610.038	3														162.84	93.69	12446.4	832.93
P00924	Enolase 1	AVDDFLISLDGTANK	0	99	Dimethyl@N-term; Dimethyl(K)@15		-0.997836	1632.86	545.293	1633.86	545.626	3														3.86	14.69	467.45	140.05
P00924	Enolase 1	AVDDFLISLDGTANK	0	99	Dimethyl:2H(6)13C(2)@N-term; Dimethyl:2H(6)13C(2)(K)@15		-1.01055	1648.93	825.475	1649.95	825.98	2														209.61	90.83	892.45	183.69
P00924	Enolase 1	NVNDVIAPAFVK	0	99	Dimethyl:2H(6)13C(2)@N-term; Dimethyl:2H(6)13C(2)(K)@12		-1.00945	1356.84	679.43	1357.85	679.934	2														207.7	97.46	16128.1	848.03
P00924	Enolase 1	HLADLSK	2	99	Dimethyl:2H(6)13C(2)@N-term; Dimethyl:2H(6)13C(2)(K)@7		-1.0079	853.572	427.793	854.58	428.297	2														73.45	24.57	5169.38	189.51
P00924	Enolase 1	GNPTVEVELTTEK	0	99	Dimethyl@N-term; Dimethyl(K)@13		-2.01601	1469.76	735.888	1471.78	736.896	2														0	0	128.42	92.7
P00924	Enolase 1	AVDDFLISLDGTANK	0	99	Dimethyl:2H(6)13C(2)@N-term; Dimethyl:2H(6)13C(2)(K)@15		-3.02631	1646.92	824.467	1649.95	825.98	2														28.59	38.92	383.63	132.48
P00360	Glyceraldehyde-3-phosphate dehydrogenase 1	TASGNIIPSSTGAAK	0	99	Dimethyl@N-term; Dimethyl(K)@15		3.01714	1432.79	478.606	1429.78	477.6	3														999.83	223.18	21814.8	1046.97
P00360	Glyceraldehyde-3-phosphate dehydrogenase 1	TASGNIIPSSTGAAK	0	99	Dimethyl:2H(6)13C(2)@N-term; Dimethyl:2H(6)13C(2)(K)@15		3.01787	1448.88	363.228	1445.87	362.474	4														0	0	0	0
P00360	Glyceraldehyde-3-phosphate dehydrogenase 1	IDVAVDSTGVFK	0	99	Dimethyl:2H(6)13C(2)@N-term; Dimethyl:2H(6)13C(2)(K)@12		1.98235	1323.79	442.27	1321.81	441.61	3														0	0	912.74	243.28
P00360	Glyceraldehyde-3-phosphate dehydrogenase 1	TASGNIIPSSTGAAK	0	99	Dimethyl@N-term; Dimethyl(K)@15		2.01141	1431.79	716.902	1429.78	715.896	2														1670.3	287.58	55336.9	1655.8
P00360	Glyceraldehyde-3-phosphate dehydrogenase 1	LISWYDNEYGYSAR	0	99	Dimethyl@N-term		2.00622	1765.82	589.615	1763.82	588.946	3														852.4	232.11	16655.7	1024.31
P00360	Glyceraldehyde-3-phosphate dehydrogenase 1	VVDLIEYVAK	0	99	Dimethyl@N-term; Dimethyl(K)@10		1.00392	1204.72	603.365	1203.71	602.863	2														151.41	96.45	77394.4	2091.93
P00360	Glyceraldehyde-3-phosphate dehydrogenase 1	VVDLIEYVAK	0	99	Dimethyl:2H(6)13C(2)@N-term; Dimethyl:2H(6)13C(2)(K)@10		1.00417	1220.8	611.409	1219.8	610.907	2														128.6	89.09	87152.5	2217.28
P00360	Glyceraldehyde-3-phosphate dehydrogenase 1	VVDLIEYVAK	0	96	Dimethyl:2H(6)13C(2)@N-term; Dimethyl:2H(6)13C(2)(K)@10		1.00075	1220.8	611.408	1219.8	610.907	2														191.63	108.04	33174.6	1421.24
P00360	Glyceraldehyde-3-phosphate dehydrogenase 1	IDVAVDSTGVFK	0	99	Dimethyl@N-term; Dimethyl(K)@12		1.00436	1306.72	654.369	1305.72	653.866	2														218.44	113.15	0	0
P00360	Glyceraldehyde-3-phosphate dehydrogenase 1	IDVAVDSTGVFK	0	99	Dimethyl:2H(6)13C(2)@N-term; Dimethyl:2H(6)13C(2)(K)@12		1.00047	1322.81	662.411	1321.81	661.911	2														265.78	129.53	42950.3	1660.39
P00360	Glyceraldehyde-3-phosphate dehydrogenase 1	TASGNIIPSSTGAAK	0	99	Dimethyl@N-term; Dimethyl(K)@15		0.995744	1430.77	477.932	1429.78	477.6	3														109.31	93.27	1280.48	460.11
P00360	Glyceraldehyde-3-phosphate dehydrogenase 1	VPTVDVSVVDLTVK	0	96	Dimethyl@N-term; Dimethyl(K)@14		1.00392	1526.9	764.458	1525.9	763.956	2														0	0	18381	1079.13
P00360	Glyceraldehyde-3-phosphate dehydrogenase 1	VINDAFGIEEGLMTTVHSM	0	99	Dimethyl:2H(6)13C(2)@N-term	cleaved M-T@C-term	1.00059	2100.05	701.023	2099.05	700.689	3														390.42	104.25	925.76	214.68
P00360	Glyceraldehyde-3-phosphate dehydrogenase 1	KDIEVVAVNDPFISNDYAAYMVK	0	99	Dimethyl:2H(6)13C(2)@N-term; Dimethyl:2H(6)13C(2)(K)@1; Dimethyl:2H(6)13C(2)(K)@23	missed K-D@1	0.987722	2709.5	678.382	2708.51	678.135	4														0	0	0	0
P00360	Glyceraldehyde-3-phosphate dehydrogenase 1	VLPELQGK	0	77	Dimethyl:2H(6)13C(2)@N-term; Deamidated(Q)@6; Dimethyl:2H(6)13C(2)(K)@8		0.0171018	955.67	478.842	955.653	478.834	2														558.55	173.47	180689	5921.48
P00360	Glyceraldehyde-3-phosphate dehydrogenase 1	IVSNASCTTNCLAPLAK	0	59	Dimethyl@N-term; Carbamidomethyl(C)@7; Deamidated(N)@10; Carbamidomethyl(C)@11; Dimethyl(K)@17		0.0309877	1875.97	626.332	1875.94	626.322	3														3355.1	440.06	1842.55	326.2
P00360	Glyceraldehyde-3-phosphate dehydrogenase 1	TASGNIIPSSTGAAK	0	99	Carbamidomethyl@N-term; Dimethyl:2H(6)13C(2)(K)@15		0.0227961	1466.83	734.425	1466.81	734.413	2														165.52	97.73	527.25	161.48
P00360	Glyceraldehyde-3-phosphate dehydrogenase 1	TASGNIIPSSTGAAK	0	99	Dimethyl@N-term; Deamidated(N)@5; Dimethyl(K)@15		0.0215262	1430.78	716.399	1430.76	716.388	2														1123.45	245.56	60274.3	1726.26
P00360	Glyceraldehyde-3-phosphate dehydrogenase 1	IVSNASCTTNCLAPLAK	0	99	Dimethyl:2H(6)13C(2)@N-term; Deamidated(N)@4; Carbamidomethyl(C)@7; Carbamidomethyl(C)@11; Dimethyl:2H(6)13C(2)(K)@17		0.0262335	1892.06	474.022	1892.03	474.015	4														0	0	1341.83	285.77
P00360	Glyceraldehyde-3-phosphate dehydrogenase 1	DPANLPWGSLK	0	99	Dimethyl@N-term; Deamidated(N)@4; Dimethyl(K)@11		0.0173251	1253.68	627.849	1253.67	627.84	2														0	0	52492.8	1936.85
P00360	Glyceraldehyde-3-phosphate dehydrogenase 1	TASGNIIPSSTGAAK	0	99	Dimethyl:2H(6)13C(2)@N-term; Deamidated(N)@5; Dimethyl:2H(6)13C(2)(K)@15		0.0168283	1446.87	483.296	1446.85	483.291	3														882.31	217.68	38916	1387.16
P00360	Glyceraldehyde-3-phosphate dehydrogenase 1	LISWYDNEYGYSAR	0	99	Dimethyl:2H(6)13C(2)@N-term; Deamidated(N)@7		0.0200748	1772.86	591.962	1772.84	591.955	3														434.1	165.91	17108	1038.04
P00360	Glyceraldehyde-3-phosphate dehydrogenase 1	IVSNASCTTNCLAPLAK	0	99	Dimethyl:2H(6)13C(2)@N-term; Carbamidomethyl(C)@7; Deamidated(N)@10; Carbamidomethyl(C)@11; Dimethyl:2H(6)13C(2)(K)@17		0.0204544	1892.05	631.692	1892.03	631.685	3														671.45	202.55	36900.6	1497.5
P00360	Glyceraldehyde-3-phosphate dehydrogenase 1	LISWYDNEYGYSAR	0	99	Dimethyl@N-term; Deamidated(N)@7		0.0187723	1764.82	883.416	1764.8	883.407	2														366.44	158.06	14448.5	954.28
P00360	Glyceraldehyde-3-phosphate dehydrogenase 1	VINDAFGIEEGLMTTVHSMTATQK	2	99	Dimethyl@N-term; Dimethyl(K)@24		0.0280607	2648.35	883.79	2648.32	883.78	3														904.77	297.9	5418.65	747
P00360	Glyceraldehyde-3-phosphate dehydrogenase 1	VINDAFGIEEGLMTTVHSMTATQK	0	99	Dimethyl@N-term; Dimethyl(K)@24		0.0280607	2648.35	883.79	2648.32	883.78	3														904.77	297.85	5418.65	746.86
P00360	Glyceraldehyde-3-phosphate dehydrogenase 1	LISWYDNEYGY	0	15	Dimethyl:2H(6)13C(2)@N-term; Deamidated(N)@7	cleaved Y-S@C-term	0.0151915	1458.69	730.352	1458.67	730.344	2														173.63	96.29	3000.06	400.38
P00360	Glyceraldehyde-3-phosphate dehydrogenase 1	VINDAFGIEEGLMTTVH	0	99	Dimethyl:2H(6)13C(2)@N-term; Deamidated(N)@3	cleaved H-S@C-term	0.019516	1881.98	628.333	1881.96	628.326	3														218.22	101.58	4905.01	453.2
P00360	Glyceraldehyde-3-phosphate dehydrogenase 1	IVSNASCTTNCLAPLAK	0	99	Dimethyl:2H(6)13C(2)@N-term; Deamidated(N)@4; Carbamidomethyl(C)@7; Deamidated(N)@10; Carbamidomethyl(C)@11; Dimethyl:2H(6)13C(2)(K)@17		0.0178852	1893.03	632.019	1893.02	632.013	3														446.45	152.67	10345	702.83
P00360	Glyceraldehyde-3-phosphate dehydrogenase 1	DIEVVAVNDPFISNDYAAYMVK	0	99	Dimethyl:2H(6)13C(2)@N-term; Deamidated(N)@8; Deamidated(N)@14; Oxidation(M)@20; Dimethyl:2H(6)13C(2)(K)@22		0.0216307	2562.32	855.115	2562.3	855.108	3														0	0	821.72	188.68
P00360	Glyceraldehyde-3-phosphate dehydrogenase 1	DIEVVAVNDPFISNDYAAY	0	99	Dimethyl:2H(6)13C(2)@N-term; Deamidated(N)@14	cleaved Y-M@C-term	0.0162995	2151.06	1076.54	2151.04	1076.53	2														0	0	1645.42	259.23
P00360	Glyceraldehyde-3-phosphate dehydrogenase 1	DIEVVAVNDPFISNDYAAYMVK	0	99	Dimethyl@N-term; Deamidated(N)@14; Dimethyl(K)@22		0.0179316	2529.25	844.092	2529.23	844.086	3														189.49	89.99	9887.01	640.33
P00360	Glyceraldehyde-3-phosphate dehydrogenase 1	DIEVVAVNDPFISNDYAAYMVK	0	99	Dimethyl@N-term; Deamidated(N)@14; Dimethyl(K)@22		0.0179316	2529.25	844.092	2529.23	844.086	3														189.93	88.69	10226	660.36
P00360	Glyceraldehyde-3-phosphate dehydrogenase 1	VINDAFGIEEGLMTTVHSMTATQK	0	99	Dimethyl:2H(6)13C(2)@N-term; Deamidated(N)@3; Dimethyl:2H(6)13C(2)(K)@24		0.0175154	2665.41	667.36	2665.39	667.355	4														252.34	167.64	3164.77	556.63
P00360	Glyceraldehyde-3-phosphate dehydrogenase 1	DIEVVAVNDPFISNDYAAY	0	92	Dimethyl@N-term; Deamidated(N)@14	cleaved Y-M@C-term	0.0125848	2143.01	1072.51	2143	1072.51	2														0	0	1645.42	259.23
P00360	Glyceraldehyde-3-phosphate dehydrogenase 1	LISWYDNEYGYSAR	0	99	Dimethyl:2H(4)@N-term; Deamidated(N)@7		0.0100825	1768.83	885.425	1768.82	885.42	2														1981.99	313.22	121.18	72.75
P00360	Glyceraldehyde-3-phosphate dehydrogenase 1	IDVAVDSTGVFK	0	86	Dimethyl@N-term; Dimethyl(K)@12		0.00716677	1305.73	653.87	1305.72	653.866	2														911.25	223.65	587.38	190.56
P00360	Glyceraldehyde-3-phosphate dehydrogenase 1	DIEVVAVNDPFISNDYAAYMVK	0	99	Dimethyl@N-term; Deamidated(N)@14; Oxidation(M)@20; Dimethyl(K)@22		0.0135975	2545.24	849.422	2545.23	849.417	3														0	0	1299.26	227.95
P00360	Glyceraldehyde-3-phosphate dehydrogenase 1	KDIEVVAVNDPFISNDYAAY	0	28	Dimethyl:2H(6)13C(2)@N-term; Dimethyl:2H(6)13C(2)(K)@1; Deamidated(N)@15	cleaved Y-M@C-term; missed K-D@1	0.0118231	2315.23	772.75	2315.21	772.746	3														167.8	96.47	679.4	192.14
P00360	Glyceraldehyde-3-phosphate dehydrogenase 1	IVSNASCTTNCLAPLAK	0	99	Dimethyl:2H(6)13C(2)@N-term; Deamidated(N)@4; Carbamidomethyl(C)@7; Deamidated(N)@10; Carbamidomethyl(C)@11; Dimethyl:2H(6)13C(2)(K)@17		0.00891306	1893.03	632.016	1893.02	632.013	3														320.64	140.56	6656.41	646.96
P00360	Glyceraldehyde-3-phosphate dehydrogenase 1	VINDAFGIEEGLMTTVHSMTATQK	0	99	Dimethyl@N-term; Deamidated(N)@3; Dimethyl(K)@24		0.0122802	2649.32	663.336	2649.3	663.333	4														435.2	219.41	2878.97	531.15
P00360	Glyceraldehyde-3-phosphate dehydrogenase 1	VVDLIEYVAK	0	99	Dimethyl@N-term; Dimethyl(K)@10		0.00540947	1203.72	402.246	1203.71	402.244	3														0	0	1572.24	310.79
P00360	Glyceraldehyde-3-phosphate dehydrogenase 1	VINDAFGIEEGLMTTVH	0	99	Dimethyl@N-term; Oxidation(H)@17	cleaved H-S@C-term	0.00764481	1888.93	945.473	1888.92	945.469	2														95.98	74.03	249.45	118.96
P00360	Glyceraldehyde-3-phosphate dehydrogenase 1	IVSNASCTTNCLAPLAK	0	98	Dimethyl:2H(6)13C(2)@N-term; Deamidated(N)@4; Carbamidomethyl(C)@7; Deamidated(N)@10; Carbamidomethyl(C)@11; Dimethyl:2H(6)13C(2)(K)@17		0.00708201	1893.02	632.015	1893.02	632.013	3														597.06	179.06	994.64	229.1
P00360	Glyceraldehyde-3-phosphate dehydrogenase 1	VINDAFGIEEGLMTTVHSMTATQK	0	99	Dimethyl@N-term; Deamidated(N)@3; Dimethyl(K)@24		0.00937591	2649.31	884.111	2649.3	884.108	3														441.58	207.68	5418.65	746.92
P00360	Glyceraldehyde-3-phosphate dehydrogenase 1	KDIEVVAVNDPFISNDYAAYMVK	0	99	Dimethyl@N-term; Dimethyl(K)@1; Dimethyl(K)@23	missed K-D@1	0.00925628	2684.39	672.104	2684.38	672.102	4														0	0	631.53	174.26
P00360	Glyceraldehyde-3-phosphate dehydrogenase 1	LTGMAFR	0	48	Delta:H(2)C(2)@N-term		0.00273382	820.429	411.222	820.427	411.221	2
P00360	Glyceraldehyde-3-phosphate dehydrogenase 1	VPTVDVSVVDLTVK	0	99	Dimethyl:2H(6)13C(2)@N-term; Dimethyl:2H(6)13C(2)(K)@14		0.00490252	1541.99	515.004	1541.99	515.002	3														237.5	111.53	6858.19	670.94
P00360	Glyceraldehyde-3-phosphate dehydrogenase 1	IVSNASCTTNCLAPLAK	0	99	Dimethyl:2H(6)13C(2)@N-term; Carbamidomethyl(C)@7; Carbamidomethyl(C)@11; Dimethyl:2H(6)13C(2)(K)@17		0.0058535	1891.05	473.771	1891.05	473.769	4														0	0	1443.85	296.23
P00360	Glyceraldehyde-3-phosphate dehydrogenase 1	IVSNASCTTNCLAPLAK	0	67	Dimethyl:2H(6)13C(2)@N-term; Carbamidomethyl(C)@7; Carbamidomethyl(C)@11; Dimethyl:2H(6)13C(2)(K)@17		0.0058535	1891.05	473.771	1891.05	473.769	4														0	0	1443.85	296.34
P00360	Glyceraldehyde-3-phosphate dehydrogenase 1	LTGMAFR	0	49	Delta:H(2)C(2)@N-term		0.00250872	820.429	411.222	820.427	411.221	2
P00360	Glyceraldehyde-3-phosphate dehydrogenase 1	LTGMAFR	0	44	Delta:H(2)C(2)@N-term		0.00250872	820.429	411.222	820.427	411.221	2
P00360	Glyceraldehyde-3-phosphate dehydrogenase 1	LISWYDNEYGYSAR	0	99	Dimethyl@N-term		0.00535062	1763.82	882.918	1763.82	882.915	2														0	0	588.12	179.49
P00360	Glyceraldehyde-3-phosphate dehydrogenase 1	DIEVVAVNDPFISNDYAAYMVK	0	99	Delta:H(2)C(2)@N-term; Deamidated(N)@14; Dimethyl(K)@22		0.00752222	2527.23	843.416	2527.22	843.414	3														0	0	0	0
P00360	Glyceraldehyde-3-phosphate dehydrogenase 1	LISWYDNEYGYSAR	0	99	Dimethyl@N-term		0.00524185	1763.82	588.947	1763.82	588.946	3														195.71	114.84	2660.27	425.17
P00360	Glyceraldehyde-3-phosphate dehydrogenase 1	IVSNASCTTNCLAPLAK	0	16	Dimethyl@N-term; Carbamidomethyl(C)@7; Deamidated(N)@10; Carbamidomethyl(C)@11; Dimethyl(K)@17		0.00541644	1875.95	626.323	1875.94	626.322	3														159.03	128.68	1126.74	363.82
P00360	Glyceraldehyde-3-phosphate dehydrogenase 1	DIEVVAVNDPF	1	99	Dimethyl:2H(6)13C(2)@N-term	cleaved F-I@C-term	0.00358809	1252.68	627.346	1252.67	627.344	2														128.51	87.82	718.56	196.95
P00360	Glyceraldehyde-3-phosphate dehydrogenase 1	VINDAFGIEEGLMTTVHSMTATQK	0	99	Dimethyl@N-term; Dimethyl(K)@24		0.00752739	2648.33	663.089	2648.32	663.087	4														812.99	309.35	3145.3	554.93
P00360	Glyceraldehyde-3-phosphate dehydrogenase 1	LISWYDNEYGYSAR	0	99	Dimethyl:2H(6)13C(2)@N-term; Deamidated(N)@7		0.00469396	1772.85	591.957	1772.84	591.955	3														328.6	150.13	2035.9	362.75
P00360	Glyceraldehyde-3-phosphate dehydrogenase 1	VVITAPSSSAPMFVVGVNHTK	0	99	Dimethyl:2H(6)13C(2)@N-term; Deamidated(N)@18; Dimethyl:2H(6)13C(2)(K)@21		0.00580339	2213.28	554.326	2213.27	554.325	4														0	0	1011.18	244.2
P00360	Glyceraldehyde-3-phosphate dehydrogenase 1	LISWYDNEYGYSAR	0	99	Dimethyl:2H(6)13C(2)@N-term		0.00444359	1771.86	886.939	1771.86	886.937	2														0	0	604.43	181.91
P00360	Glyceraldehyde-3-phosphate dehydrogenase 1	LISWYDNEYGYSAR	0	97	Dimethyl@N-term; Deamidated(N)@7		0.00432017	1764.8	589.275	1764.8	589.274	3														315.35	147.13	1862.58	347.22
P00360	Glyceraldehyde-3-phosphate dehydrogenase 1	IAINGFGR	0	62	Dimethyl:2H(6)13C(2)@N-term; Deamidated(N)@4		0.00210605	883.533	442.774	883.531	442.773	2														186.18	107.24	1193.93	270.41
P00360	Glyceraldehyde-3-phosphate dehydrogenase 1	IAINGFGR	0	99	Dimethyl@N-term; Deamidated(N)@4		0.00203455	875.489	438.752	875.487	438.751	2														606.07	200.13	5952.84	652.6
P00360	Glyceraldehyde-3-phosphate dehydrogenase 1	IAINGFGR	0	85	Dimethyl@N-term; Deamidated(N)@4		0.00203455	875.489	438.752	875.487	438.751	2														626.49	202.96	6200.23	749.44
P00360	Glyceraldehyde-3-phosphate dehydrogenase 1	IVSNASCTTNCLAPLAK	0	99	Delta:H(2)C(2)@N-term; Carbamidomethyl(C)@7; Carbamidomethyl(C)@11; Dimethyl(K)@17		0.00430909	1872.95	937.481	1872.94	937.479	2														0	0	0	0
P00360	Glyceraldehyde-3-phosphate dehydrogenase 1	VINDAFGIEEGLMTTVHSMTATQK	0	59	Dimethyl@N-term; Dimethyl(K)@24		0.00581841	2648.32	663.088	2648.32	663.087	4														510.36	229.33	3183.92	572.47
P00360	Glyceraldehyde-3-phosphate dehydrogenase 1	IAINGFGR	2	99	Dimethyl@N-term; Deamidated(N)@4		0.00185144	875.488	438.752	875.487	438.751	2														773.97	242.35	26379	1411.27
P00360	Glyceraldehyde-3-phosphate dehydrogenase 1	IAINGFGR	0	95	Dimethyl@N-term; Deamidated(N)@4		0.00185144	875.488	438.752	875.487	438.751	2														773.97	242.13	26379	1411.32
P00360	Glyceraldehyde-3-phosphate dehydrogenase 1	IVSNASCTTNCLAPLAK	0	99	Dimethyl:2H(6)13C(2)@N-term; Carbamidomethyl(C)@7; Carbamidomethyl(C)@11; Dimethyl:2H(6)13C(2)(K)@17		0.00398052	1891.05	631.358	1891.05	631.357	3														163.97	118.61	1462.27	345.31
P00360	Glyceraldehyde-3-phosphate dehydrogenase 1	IVSNASCTTNCLAPLAK	0	99	Dimethyl@N-term; Carbamidomethyl(C)@7; Carbamidomethyl(C)@11; Dimethyl(K)@17		0.00359105	1874.96	625.995	1874.96	625.994	3														0	0	33943.5	1437.8
P00360	Glyceraldehyde-3-phosphate dehydrogenase 1	IVSNASCTTNCLAPLAK	0	99	Dimethyl@N-term; Carbamidomethyl(C)@7; Carbamidomethyl(C)@11; Dimethyl(K)@17		0.00359105	1874.96	625.995	1874.96	625.994	3														0	0	33943.5	1437.38
P00360	Glyceraldehyde-3-phosphate dehydrogenase 1	IVSNASCTTNCLAPLAK	0	99	Dimethyl@N-term; Carbamidomethyl(C)@7; Carbamidomethyl(C)@11; Dimethyl(K)@17		0.00359105	1874.96	625.995	1874.96	625.994	3														0	0	33943.5	1437.29
P00360	Glyceraldehyde-3-phosphate dehydrogenase 1	IVSNASCTTNCLAPLAK	2	99	Dimethyl@N-term; Carbamidomethyl(C)@7; Carbamidomethyl(C)@11; Dimethyl(K)@17		0.00340794	1874.96	625.995	1874.96	625.994	3														658.01	200.78	33733.8	1433.06
P00360	Glyceraldehyde-3-phosphate dehydrogenase 1	DIEVVAVNDPFISNDYAAY	0	99	Dimethyl:2H(6)13C(2)@N-term	cleaved Y-M@C-term	0.00375006	2150.06	717.695	2150.06	717.694	3														215.34	95.94	2333	322.13
P00360	Glyceraldehyde-3-phosphate dehydrogenase 1	IVSNASCTTNCLAPLAK	0	99	Dimethyl:2H(6)13C(2)@N-term; Carbamidomethyl(C)@7; Carbamidomethyl(C)@11; Dimethyl:2H(6)13C(2)(K)@17		0.0032481	1891.05	631.358	1891.05	631.357	3														0	0	36900.6	1497.79
P00360	Glyceraldehyde-3-phosphate dehydrogenase 1	IVSNASCTTNCLAPLAK	0	99	Dimethyl:2H(6)13C(2)@N-term; Carbamidomethyl(C)@7; Carbamidomethyl(C)@11; Dimethyl:2H(6)13C(2)(K)@17		0.0032481	1891.05	631.358	1891.05	631.357	3														0	0	36900.6	1497.71
P00360	Glyceraldehyde-3-phosphate dehydrogenase 1	IVSNASCTTNCLAPLAK	0	99	Dimethyl:2H(6)13C(2)@N-term; Carbamidomethyl(C)@7; Carbamidomethyl(C)@11; Dimethyl:2H(6)13C(2)(K)@17		0.0032481	1891.05	631.358	1891.05	631.357	3														0	0	36900.6	1497.5
P00360	Glyceraldehyde-3-phosphate dehydrogenase 1	LISWYDNEYGYSAR	0	99	Dimethyl@N-term; Deamidated(N)@7		0.00302524	1764.8	883.409	1764.8	883.407	2														212.48	120.78	2140.17	371.99
P00360	Glyceraldehyde-3-phosphate dehydrogenase 1	LISWYDNEYGYSAR	0	99	Dimethyl@N-term; Deamidated(N)@7		0.00302524	1764.8	883.409	1764.8	883.407	2														212.48	120.61	2140.17	371.82
P00360	Glyceraldehyde-3-phosphate dehydrogenase 1	IAINGFGR	0	99	Dimethyl:2H(6)13C(2)@N-term; Deamidated(N)@4		0.0014957	883.532	442.774	883.531	442.773	2														773.97	242.23	26379	1411.25
P00360	Glyceraldehyde-3-phosphate dehydrogenase 1	IAINGFGR	0	99	Dimethyl:2H(6)13C(2)@N-term; Deamidated(N)@4		0.0014957	883.532	442.774	883.531	442.773	2														773.97	242.16	26379	1411.35
P00360	Glyceraldehyde-3-phosphate dehydrogenase 1	IAINGFGR	0	99	Dimethyl:2H(6)13C(2)@N-term; Deamidated(N)@4		0.0014957	883.532	442.774	883.531	442.773	2														1398.72	296.8	6908.27	702.21
P00360	Glyceraldehyde-3-phosphate dehydrogenase 1	IAINGFGR	0	24	Dimethyl:2H(6)13C(2)@N-term; Deamidated(N)@4		0.0014957	883.532	442.774	883.531	442.773	2														1398.72	297.01	6908.27	702.22
P00360	Glyceraldehyde-3-phosphate dehydrogenase 1	IAINGFGR	0	22	Dimethyl:2H(6)13C(2)@N-term; Deamidated(N)@4		0.0014957	883.532	442.774	883.531	442.773	2														1398.72	296.8	6908.27	702.15
P00360	Glyceraldehyde-3-phosphate dehydrogenase 1	DIEVVAVNDPFISNDYAAYMVK	0	99	Dimethyl:2H(6)13C(2)@N-term; Deamidated(N)@14; Dimethyl:2H(6)13C(2)(K)@22		0.00418332	2545.33	849.45	2545.32	849.448	3														0	0	2490.4	315.62
P00360	Glyceraldehyde-3-phosphate dehydrogenase 1	DIEVVAVNDPFISNDYAAY	0	99	Dimethyl@N-term	cleaved Y-M@C-term	0.00343763	2142.02	1072.02	2142.02	1072.02	2														127.42	73.65	1645.42	259.23
P00360	Glyceraldehyde-3-phosphate dehydrogenase 1	DIEVVAVNDPFISNDYAAY	0	99	Dimethyl@N-term	cleaved Y-M@C-term	0.00343763	2142.02	1072.02	2142.02	1072.02	2														127.42	73.67	1645.42	259.26
P00360	Glyceraldehyde-3-phosphate dehydrogenase 1	LTGMAFR	2	99	Dimethyl@N-term		0.00130457	822.443	412.229	822.442	412.228	2														1188.1	288.59	34800.1	1864.24
P00360	Glyceraldehyde-3-phosphate dehydrogenase 1	LTGMAFR	0	99	Dimethyl@N-term		0.00130457	822.443	412.229	822.442	412.228	2														1188.1	288.58	34800.1	1864.19
P00360	Glyceraldehyde-3-phosphate dehydrogenase 1	LTGMAFR	0	90	Dimethyl@N-term		0.00130457	822.443	412.229	822.442	412.228	2														1188.1	288.59	35284.4	1877.13
P00360	Glyceraldehyde-3-phosphate dehydrogenase 1	LTGMAFR	0	28	Dimethyl@N-term		0.00130457	822.443	412.229	822.442	412.228	2														1212.61	307.41	34800.1	1864.13
P00360	Glyceraldehyde-3-phosphate dehydrogenase 1	DIEVVAVNDPFISNDYAAYMVK	0	99	Dimethyl:2H(6)13C(2)@N-term; Deamidated(N)@14; Dimethyl:2H(6)13C(2)(K)@22		0.00381711	2545.33	849.45	2545.32	849.448	3														0	0	404.57	119.07
P00360	Glyceraldehyde-3-phosphate dehydrogenase 1	DIEVVAVNDPFISNDYAAYMVK	0	98	Dimethyl:2H(6)13C(2)@N-term; Deamidated(N)@8; Dimethyl:2H(6)13C(2)(K)@22		0.00381711	2545.33	849.45	2545.32	849.448	3														0	0	404.57	118.98
P00360	Glyceraldehyde-3-phosphate dehydrogenase 1	VVDLIEYVAK	0	99	Dimethyl:2H(6)13C(2)@N-term; Dimethyl:2H(6)13C(2)(K)@10		0.00172762	1219.8	610.908	1219.8	610.907	2														128.35	82.93	87451	2220.97
P00360	Glyceraldehyde-3-phosphate dehydrogenase 1	VVDLIEYVAK	0	99	Dimethyl:2H(6)13C(2)@N-term; Dimethyl:2H(6)13C(2)(K)@10		0.00172762	1219.8	610.908	1219.8	610.907	2														128.35	82.93	87451	2221.59
P00360	Glyceraldehyde-3-phosphate dehydrogenase 1	VVDLIEYVAK	0	99	Dimethyl:2H(6)13C(2)@N-term; Dimethyl:2H(6)13C(2)(K)@10		0.00172762	1219.8	610.908	1219.8	610.907	2														120.78	86.78	91326.1	2269.74
P00360	Glyceraldehyde-3-phosphate dehydrogenase 1	VVDLIEYVAK	0	99	Dimethyl:2H(6)13C(2)@N-term; Dimethyl:2H(6)13C(2)(K)@10		0.00172762	1219.8	610.908	1219.8	610.907	2														128.35	82.98	87451	2220.96
P00360	Glyceraldehyde-3-phosphate dehydrogenase 1	DIEVVAVNDPFISNDYAAYMVK	0	97	Dimethyl:2H(6)13C(2)@N-term; Oxidation(M)@20; Dimethyl:2H(6)13C(2)(K)@22		0.00354481	2560.34	641.092	2560.33	641.091	4														0	0	231.83	96.07
P00360	Glyceraldehyde-3-phosphate dehydrogenase 1	VINDAFGIEEGLMTTVH	0	99	Delta:H(2)C(2)@N-term	cleaved H-S@C-term	0.00249548	1870.92	936.465	1870.91	936.464	2
P00360	Glyceraldehyde-3-phosphate dehydrogenase 1	IVSNASCTTNCLAPLAK	0	38	Arg-add@N-term; Carbamidomethyl(C)@7; Carbamidomethyl(C)@11; Dimethyl:2H(6)13C(2)(K)@17		0.00266586	2011.08	671.366	2011.07	671.365	3														132.48	90.05	1399.71	292.3
P00360	Glyceraldehyde-3-phosphate dehydrogenase 1	VVITAPSSSAPM	0	35	Dimethyl:2H(6)13C(2)@N-term	cleaved M-F@C-term	0.00152453	1194.67	598.344	1194.67	598.343	2														1646.79	294.79	2222.55	337.98
P00360	Glyceraldehyde-3-phosphate dehydrogenase 1	ASCTTNCLAPLAK	0	99	Dimethyl:2H(6)13C(2)@N-term; Carbamidomethyl(C)@3; Carbamidomethyl(C)@7; Dimethyl:2H(6)13C(2)(K)@13	cleaved N-A@N-term	0.00175073	1477.82	739.918	1477.82	739.918	2														70.65	59.41	490.74	158.87
P00360	Glyceraldehyde-3-phosphate dehydrogenase 1	EATYDQIKK	0	95	Delta:H(2)C(2)@N-term; Dimethyl(K)@8; Dimethyl(K)@9	missed K-K@8	0.00138698	1176.64	393.221	1176.64	393.22	3														28.84	23.97	0	0
P00360	Glyceraldehyde-3-phosphate dehydrogenase 1	EATYDQIKK	0	17	Delta:H(2)C(2)@N-term; Dimethyl(K)@8; Dimethyl(K)@9	missed K-K@8	0.00138698	1176.64	393.221	1176.64	393.22	3														23.61	21.37	0	0
P00360	Glyceraldehyde-3-phosphate dehydrogenase 1	IATYQERDPANLPWGSLK	0	99	Dimethyl@N-term; Dimethyl(K)@18	missed R-D@7	0.00246723	2114.12	529.537	2114.12	529.536	4														0	0	839.63	239.13
P00360	Glyceraldehyde-3-phosphate dehydrogenase 1	DIEVVAVNDPFISNDYAAYMVK	0	99	Dimethyl:2H(6)13C(2)@N-term; Dimethyl:2H(6)13C(2)(K)@22		0.00287225	2544.34	637.093	2544.34	637.092	4														0	0	2151.53	298.3
P00360	Glyceraldehyde-3-phosphate dehydrogenase 1	DIEVVAVNDPFISNDYAAYMVK	0	99	Dimethyl:2H(6)13C(2)@N-term; Dimethyl:2H(6)13C(2)(K)@22		0.00287225	2544.34	637.093	2544.34	637.092	4														0	0	2151.53	298.27
P00360	Glyceraldehyde-3-phosphate dehydrogenase 1	KDIEVVAVNDPFISNDYAAYMVK	2	99	Dimethyl@N-term; Dimethyl(K)@1; Dimethyl(K)@23	missed K-D@1	0.00293435	2684.38	895.801	2684.38	895.8	3														0	0	1627.13	267.47
P00360	Glyceraldehyde-3-phosphate dehydrogenase 1	KDIEVVAVNDPFISNDYAAYMVK	0	99	Dimethyl@N-term; Dimethyl(K)@1; Dimethyl(K)@23	missed K-D@1	0.00293435	2684.38	895.801	2684.38	895.8	3														0	0	1627.13	267.58
P00360	Glyceraldehyde-3-phosphate dehydrogenase 1	VPTVDVSVVDLTVK	0	99	Dimethyl:2H(6)13C(2)@N-term; Dimethyl:2H(6)13C(2)(K)@14		0.00160662	1541.99	515.003	1541.99	515.002	3														188.94	98.51	8426.45	743
P00360	Glyceraldehyde-3-phosphate dehydrogenase 1	VVDLIEYVAK	2	99	Dimethyl@N-term; Dimethyl(K)@10		0.00123216	1203.71	602.864	1203.71	602.863	2														151.41	96.71	77394.4	2092.43
P00360	Glyceraldehyde-3-phosphate dehydrogenase 1	VVDLIEYVAK	0	99	Dimethyl@N-term; Dimethyl(K)@10		0.00123216	1203.71	602.864	1203.71	602.863	2														151.41	96.43	77394.4	2091.77
P00360	Glyceraldehyde-3-phosphate dehydrogenase 1	VVDLIEYVAK	0	99	Dimethyl@N-term; Dimethyl(K)@10		0.00123216	1203.71	602.864	1203.71	602.863	2														151.41	96.71	80823.9	2137.72
P00360	Glyceraldehyde-3-phosphate dehydrogenase 1	VVDLIEYVAK	0	17	Dimethyl@N-term; Dimethyl(K)@10		0.00123216	1203.71	602.864	1203.71	602.863	2														145.51	94.63	77394.4	2091.76
P00360	Glyceraldehyde-3-phosphate dehydrogenase 1	IVSNASCTTNCLAPLAK	0	39	Arg-add@N-term; Carbamidomethyl(C)@7; Carbamidomethyl(C)@11; Dimethyl:2H(6)13C(2)(K)@17		0.00193343	2011.08	671.366	2011.07	671.365	3														0	0	1475.25	291.54
P00360	Glyceraldehyde-3-phosphate dehydrogenase 1	VINDAFGIEEGLMTTVH	0	99	Dimethyl:2H(6)13C(2)@N-term	cleaved H-S@C-term	0.00166635	1880.98	941.495	1880.97	941.494	2														437.35	142.92	3781.36	397.86
P00360	Glyceraldehyde-3-phosphate dehydrogenase 1	IDVAVDSTGVFK	0	99	Dimethyl:2H(6)13C(2)@N-term; Dimethyl:2H(6)13C(2)(K)@12		0.00114598	1321.81	441.61	1321.81	441.61	3														0	0	1819.53	340.83
P00360	Glyceraldehyde-3-phosphate dehydrogenase 1	VLPELQGK	0	97	Dimethyl@N-term; Dimethyl(K)@8		0.000805894	938.581	470.298	938.58	470.297	2														534.85	312.27	151562	5250.4
P00360	Glyceraldehyde-3-phosphate dehydrogenase 1	VLPELQGK	0	62	Dimethyl@N-term; Dimethyl(K)@8		0.000805894	938.581	470.298	938.58	470.297	2														192.17	148.77	38620.1	2318.8
P00360	Glyceraldehyde-3-phosphate dehydrogenase 1	VINDAFGIEEGLMTTVH	0	99	Dimethyl@N-term	cleaved H-S@C-term	0.00157933	1872.93	937.473	1872.93	937.472	2														436.56	142.48	3784.23	397.66
P00360	Glyceraldehyde-3-phosphate dehydrogenase 1	VVITAPSSSAPM	1	99	Dimethyl@N-term	cleaved M-F@C-term	0.00096374	1186.63	594.321	1186.63	594.321	2														1646.79	294.79	2222.55	337.98
P00360	Glyceraldehyde-3-phosphate dehydrogenase 1	LISWYDNEYGYSAR	0	99	Delta:H(2)C(2)@N-term		0.00137186	1761.8	588.274	1761.8	588.274	3
P00360	Glyceraldehyde-3-phosphate dehydrogenase 1	IDVAVDSTGVFK	0	84	Dimethyl:2H(6)13C(2)@N-term; Dimethyl:2H(6)13C(2)(K)@12		0.000956871	1321.81	661.911	1321.81	661.911	2														0	0	3655.11	464.4
P00360	Glyceraldehyde-3-phosphate dehydrogenase 1	TASGNIIPSSTGAAK	0	99	Dimethyl@N-term; Dimethyl(K)@15		0.00102097	1429.78	715.897	1429.78	715.896	2														1736.6	293.13	60274.3	1726.28
P00360	Glyceraldehyde-3-phosphate dehydrogenase 1	TASGNIIPSSTGAAK	0	99	Dimethyl@N-term; Dimethyl(K)@15		0.00102097	1429.78	715.897	1429.78	715.896	2														1736.6	293.09	60274.3	1726.28
P00360	Glyceraldehyde-3-phosphate dehydrogenase 1	TASGNIIPSSTGAAK	0	99	Dimethyl@N-term; Dimethyl(K)@15		0.00102097	1429.78	715.897	1429.78	715.896	2														1736.6	293.12	60274.3	1726.51
P00360	Glyceraldehyde-3-phosphate dehydrogenase 1	DIEVVAVNDPFISNDYAAYMVK	0	99	Dimethyl@N-term; Dimethyl(K)@22		0.00178717	2528.25	633.07	2528.25	633.07	4														0	0	1917.66	282.01
P00360	Glyceraldehyde-3-phosphate dehydrogenase 1	IATYQERDPANLPWGSLK	0	99	Dimethyl:2H(6)13C(2)@N-term; Dimethyl:2H(6)13C(2)(K)@18	missed R-D@7	0.00146257	2130.21	711.076	2130.2	711.076	3														26	40.78	4622.07	560.61
P00360	Glyceraldehyde-3-phosphate dehydrogenase 1	IATYQERDPANLPWGSLK	0	99	Dimethyl:2H(6)13C(2)@N-term; Dimethyl:2H(6)13C(2)(K)@18	missed R-D@7	0.00146257	2130.21	711.076	2130.2	711.076	3														0	0	4622.07	560.58
P00360	Glyceraldehyde-3-phosphate dehydrogenase 1	LISWYDNEYGYSAR	0	99	Dimethyl@N-term		0.00120023	1763.82	882.916	1763.82	882.915	2														129.13	98.48	2196.22	388.65
P00360	Glyceraldehyde-3-phosphate dehydrogenase 1	VINDAFGIEEGLMTTVHSM	0	99	Dimethyl:2H(6)13C(2)@N-term	cleaved M-T@C-term	0.00138448	2099.05	700.69	2099.05	700.689	3														322.86	105.04	1062.7	229.63
P00360	Glyceraldehyde-3-phosphate dehydrogenase 1	VINDAFGIEEGLMTTVHSM	0	99	Dimethyl:2H(6)13C(2)@N-term	cleaved M-T@C-term	0.00138448	2099.05	700.69	2099.05	700.689	3														322.86	105.16	1062.7	229.66
P00360	Glyceraldehyde-3-phosphate dehydrogenase 1	VLPELQGK	1	99	Dimethyl@N-term; Deamidated(Q)@6; Dimethyl(K)@8		0.000619588	939.565	470.79	939.564	470.789	2														218.13	110.79	918.81	245.69
P00360	Glyceraldehyde-3-phosphate dehydrogenase 1	DIEVVAVNDPFISNDYAAYMVK	0	99	Dimethyl@N-term; Cation:Na(D)@9; Dimethyl(K)@22		0.00166562	2550.23	851.085	2550.23	851.085	3														4309	388.43	38.43	45.03
P00360	Glyceraldehyde-3-phosphate dehydrogenase 1	IVSNASCTTNCLAPLAK	0	99	Dimethyl:2H(6)13C(2)@N-term; Deamidated(N)@4; Carbamidomethyl(C)@7; Carbamidomethyl(C)@11; Dimethyl:2H(6)13C(2)(K)@17		0.00122828	1892.03	631.685	1892.03	631.685	3														515.32	159.84	10345	702.64
P00360	Glyceraldehyde-3-phosphate dehydrogenase 1	VVDLIEYVAK	0	99	Delta:H(2)C(2)@N-term; Dimethyl(K)@10		0.000767371	1201.7	601.856	1201.7	601.855	2														143.88	65.42	0	0
P00360	Glyceraldehyde-3-phosphate dehydrogenase 1	VVDLIEYVAK	0	98	Delta:H(2)C(2)@N-term; Dimethyl(K)@10		0.000767371	1201.7	601.856	1201.7	601.855	2														143.88	65.42	0	0
P00360	Glyceraldehyde-3-phosphate dehydrogenase 1	TTNCLAPLAK	0	20	Dimethyl@N-term; Carbamidomethyl(C)@4; Dimethyl(K)@10	cleaved C-T@N-term	0.000680056	1143.63	572.824	1143.63	572.823	2														292.8	193.88	5380.06	774.35
P00360	Glyceraldehyde-3-phosphate dehydrogenase 1	LISWYDNEYGYSAR	0	99	Dimethyl:2H(6)13C(2)@N-term; Deamidated(N)@7		0.00101957	1772.84	887.43	1772.84	887.429	2														212.48	120.74	2140.17	372.04
P00360	Glyceraldehyde-3-phosphate dehydrogenase 1	LISWYDNEYGYSAR	0	99	Dimethyl:2H(6)13C(2)@N-term; Deamidated(N)@7		0.00101957	1772.84	887.43	1772.84	887.429	2														212.48	120.78	2140.17	371.77
P00360	Glyceraldehyde-3-phosphate dehydrogenase 1	TASGNIIPSSTGAAK	0	99	No Dimethyl@N-term; Dimethyl:2H(6)13C(2)(K)@15		0.000806456	1409.79	705.903	1409.79	705.903	2														214.17	97.69	3574.3	369.62
P00360	Glyceraldehyde-3-phosphate dehydrogenase 1	TASGNIIPSSTGAAK	0	99	No Dimethyl@N-term; Dimethyl:2H(6)13C(2)(K)@15		0.000806456	1409.79	705.903	1409.79	705.903	2														214.17	97.69	3574.3	369.56
P00360	Glyceraldehyde-3-phosphate dehydrogenase 1	KDIEVVAVNDPFISNDYAAYMVK	0	99	Dimethyl:2H(6)13C(2)@N-term; Dimethyl:2H(6)13C(2)(K)@1; Dimethyl:2H(6)13C(2)(K)@23	missed K-D@1	0.00148188	2708.51	903.845	2708.51	903.844	3														0	0	1627.13	267.59
P00360	Glyceraldehyde-3-phosphate dehydrogenase 1	IDVAVDSTGVFK	0	99	Dimethyl@N-term; Dimethyl(K)@12		0.000697044	1305.72	653.867	1305.72	653.866	2														167.53	97.07	9618.11	734.27
P00360	Glyceraldehyde-3-phosphate dehydrogenase 1	KDIEVVAVNDPFISNDYAAY	0	87	Dimethyl@N-term; Dimethyl(K)@1	cleaved Y-M@C-term; missed K-D@1	0.00120175	2298.14	767.055	2298.14	767.055	3														351.06	136.17	600.39	180.84
P00360	Glyceraldehyde-3-phosphate dehydrogenase 1	IVSNASCTTNCLAPLAK	0	99	Dimethyl:2H(6)13C(2)@N-term; Carbamidomethyl(C)@7; Carbamidomethyl(C)@11; Dimethyl:2H(6)13C(2)(K)@17		0.000967414	1891.05	946.532	1891.05	946.531	2														0	0	9718.21	768.47
P00360	Glyceraldehyde-3-phosphate dehydrogenase 1	TASGNIIPSSTGAAK	0	99	No Dimethyl@N-term; Dimethyl(K)@15		0.00070933	1401.75	701.881	1401.75	701.88	2														274.24	110.27	3480.31	364.85
P00360	Glyceraldehyde-3-phosphate dehydrogenase 1	TASGNIIPSSTGAAK	0	99	No Dimethyl@N-term; Dimethyl(K)@15		0.00070933	1401.75	701.881	1401.75	701.88	2														274.24	110.14	3480.31	364.88
P00360	Glyceraldehyde-3-phosphate dehydrogenase 1	VINDAFGIEEGLMTTVH	0	99	Dimethyl:2H(6)13C(2)@N-term	cleaved H-S@C-term	0.000949233	1880.97	627.999	1880.97	627.998	3														379.84	133.67	4903.91	453
P00360	Glyceraldehyde-3-phosphate dehydrogenase 1	VINDAFGIEEGLMTTVH	0	99	Dimethyl:2H(6)13C(2)@N-term	cleaved H-S@C-term	0.000949233	1880.97	627.999	1880.97	627.998	3														380.24	133.6	4903.91	452.66
P00360	Glyceraldehyde-3-phosphate dehydrogenase 1	DIEVVAVNDPFISNDYAAY	2	99	Dimethyl@N-term	cleaved Y-M@C-term	0.00101066	2142.02	715.013	2142.02	715.013	3														215.34	96.08	2333	322.16
P00360	Glyceraldehyde-3-phosphate dehydrogenase 1	TASGNIIPSSTGAAK	0	99	Dimethyl@N-term; Dimethyl(K)@15		0.000654173	1429.78	477.6	1429.78	477.6	3														1317.12	255.62	35193.7	1320.55
P00360	Glyceraldehyde-3-phosphate dehydrogenase 1	VINDAFGIEEGLMTTVH	0	99	Dimethyl:2H(6)13C(2)@N-term	cleaved H-S@C-term	0.000847196	1880.97	627.999	1880.97	627.998	3														368.79	132.03	4905.01	453.28
P00360	Glyceraldehyde-3-phosphate dehydrogenase 1	VINDAFGIEEGLMTTVH	0	82	Dimethyl:2H(6)13C(2)@N-term	cleaved H-S@C-term	0.000847196	1880.97	627.999	1880.97	627.998	3														368.79	131.8	5002.82	457.55
P00360	Glyceraldehyde-3-phosphate dehydrogenase 1	IVSNASCTTNCLAPLAK	0	99	Dimethyl@N-term; Deamidated(N)@4; Carbamidomethyl(C)@7; Carbamidomethyl(C)@11; Dimethyl(K)@17		0.000838801	1875.94	626.322	1875.94	626.322	3														639.18	177.44	9865.95	686.36
P00360	Glyceraldehyde-3-phosphate dehydrogenase 1	IVSNASCTTNCLAPLAK	0	99	Dimethyl@N-term; Deamidated(N)@4; Carbamidomethyl(C)@7; Carbamidomethyl(C)@11; Dimethyl(K)@17		0.000838801	1875.94	626.322	1875.94	626.322	3														639.18	177.46	9865.95	686.84
P00360	Glyceraldehyde-3-phosphate dehydrogenase 1	IVSNASCTTNCLAPLAK	0	99	Dimethyl@N-term; Deamidated(N)@4; Carbamidomethyl(C)@7; Carbamidomethyl(C)@11; Dimethyl(K)@17		0.000838801	1875.94	626.322	1875.94	626.322	3														639.18	177.72	9865.95	686.32
P00360	Glyceraldehyde-3-phosphate dehydrogenase 1	IVSNASCTTNCLAPLAK	0	99	Dimethyl:2H(6)13C(2)@N-term; Carbamidomethyl(C)@7; Carbamidomethyl(C)@11; Dimethyl:2H(6)13C(2)(K)@17		0.000845343	1891.05	946.532	1891.05	946.531	2														0	0	9504.41	760.12
P00360	Glyceraldehyde-3-phosphate dehydrogenase 1	IVSNASCTTNCLAPLAK	0	99	Dimethyl:2H(6)13C(2)@N-term; Carbamidomethyl(C)@7; Carbamidomethyl(C)@11; Dimethyl:2H(6)13C(2)(K)@17		0.000845343	1891.05	946.532	1891.05	946.531	2														0	0	9504.41	760.01
P00360	Glyceraldehyde-3-phosphate dehydrogenase 1	LISWYDNEYGYSAR	0	16	Dimethyl:2H(6)13C(2)@N-term		0.000781476	1771.86	886.938	1771.86	886.937	2														96.42	81.55	304.67	149.28
P00360	Glyceraldehyde-3-phosphate dehydrogenase 1	VVDLIEYVAK	0	70	Dimethyl@N-term; Dimethyl(K)@10		0.000499742	1203.71	602.863	1203.71	602.863	2														156.79	85.36	308.33	123.21
P00360	Glyceraldehyde-3-phosphate dehydrogenase 1	LISWYDNEYGYSAR	2	99	Dimethyl@N-term		0.000664211	1763.82	588.946	1763.82	588.946	3														852.4	232.11	16655.7	1024.33
P00360	Glyceraldehyde-3-phosphate dehydrogenase 1	LISWYDNEYGYSAR	0	99	Dimethyl@N-term		0.000664211	1763.82	588.946	1763.82	588.946	3														852.4	232.33	16655.7	1024.36
P00360	Glyceraldehyde-3-phosphate dehydrogenase 1	LISWYDNEYGYSAR	0	99	Dimethyl@N-term		0.000664211	1763.82	588.946	1763.82	588.946	3														859.53	233.09	17031.9	1035.78
P00360	Glyceraldehyde-3-phosphate dehydrogenase 1	IVSNASCTTNCLAPLAK	0	99	Dimethyl@N-term; Carbamidomethyl(C)@7; Deamidated(N)@10; Carbamidomethyl(C)@11; Dimethyl(K)@17		0.000655695	1875.94	626.322	1875.94	626.322	3														0	0	4911.87	707.54
P00360	Glyceraldehyde-3-phosphate dehydrogenase 1	IVSNASCTTNCLAPLAK	0	99	Dimethyl@N-term; Carbamidomethyl(C)@7; Deamidated(N)@10; Carbamidomethyl(C)@11; Dimethyl(K)@17		0.000655695	1875.94	626.322	1875.94	626.322	3														0	0	4911.87	707.88
P00360	Glyceraldehyde-3-phosphate dehydrogenase 1	IVSNASCTTNCLAPLAK	0	99	Dimethyl@N-term; Carbamidomethyl(C)@7; Deamidated(N)@10; Carbamidomethyl(C)@11; Dimethyl(K)@17		0.000655695	1875.94	626.322	1875.94	626.322	3														0	0	4911.87	708.85
P00360	Glyceraldehyde-3-phosphate dehydrogenase 1	VINDAFGIEEGLMTTVH	0	99	Dimethyl@N-term	cleaved H-S@C-term	0.000636762	1872.93	937.472	1872.93	937.472	2														437.35	142.63	3781.36	397.86
P00360	Glyceraldehyde-3-phosphate dehydrogenase 1	VINDAFGIEEGLMTTVH	0	99	Dimethyl@N-term	cleaved H-S@C-term	0.000636762	1872.93	937.472	1872.93	937.472	2														437.35	142.69	3781.36	397.98
P00360	Glyceraldehyde-3-phosphate dehydrogenase 1	VINDAFGIEEGLMTTVH	0	99	Dimethyl@N-term	cleaved H-S@C-term	0.000636762	1872.93	937.472	1872.93	937.472	2														437.35	142.84	3781.36	397.81
P00360	Glyceraldehyde-3-phosphate dehydrogenase 1	VPTVDVSVVDLTVK	2	99	Dimethyl@N-term; Dimethyl(K)@14		0.000500019	1525.9	763.956	1525.9	763.956	2														0	0	18381	1079.77
P00360	Glyceraldehyde-3-phosphate dehydrogenase 1	VPTVDVSVVDLTVK	0	99	Dimethyl@N-term; Dimethyl(K)@14		0.000500019	1525.9	763.956	1525.9	763.956	2														0	0	18381	1078.77
P00360	Glyceraldehyde-3-phosphate dehydrogenase 1	VPTVDVSVVDLTVK	0	99	Dimethyl@N-term; Dimethyl(K)@14		0.000500019	1525.9	763.956	1525.9	763.956	2														0	0	18381	1078.9
P00360	Glyceraldehyde-3-phosphate dehydrogenase 1	PSSTGAAK	0	99	No Dimethyl@N-term; Dimethyl:2H(6)13C(2)(K)@8	cleaved I-P@N-term	0.000229671	753.442	377.728	753.441	377.728	2														102	71.11	1286.27	252.3
P00360	Glyceraldehyde-3-phosphate dehydrogenase 1	IVSNASCTTNCLAPLAK	0	99	Dimethyl@N-term; Carbamidomethyl(C)@7; Deamidated(N)@10; Carbamidomethyl(C)@11; Dimethyl(K)@17		0.00044815	1875.94	938.979	1875.94	938.979	2														0	0	1526.48	403.21
P00360	Glyceraldehyde-3-phosphate dehydrogenase 1	VVITAPSSSAPMFVVGVN	0	47	Dimethyl@N-term	cleaved N-H@C-term	0.000330483	1801.97	901.99	1801.96	901.99	2														215.52	97.43	275.69	112.86
P00360	Glyceraldehyde-3-phosphate dehydrogenase 1	IDVAVDSTGVFK	0	99	Dimethyl:2H(6)13C(2)@N-term; Dimethyl:2H(6)13C(2)(K)@12		0.000224448	1321.81	661.911	1321.81	661.911	2														0	0	1222.67	256.49
P00360	Glyceraldehyde-3-phosphate dehydrogenase 1	IDVAVDSTGVFK	0	99	Dimethyl:2H(6)13C(2)@N-term; Dimethyl:2H(6)13C(2)(K)@12		0.000224448	1321.81	661.911	1321.81	661.911	2														95.02	78.65	992.69	239.85
P00360	Glyceraldehyde-3-phosphate dehydrogenase 1	LTGMAFR	0	99	Dimethyl:2H(6)13C(2)@N-term		0.000114034	830.487	416.251	830.487	416.251	2														1066.24	273.62	38482	1959.24
P00360	Glyceraldehyde-3-phosphate dehydrogenase 1	LTGMAFR	0	97	Dimethyl:2H(6)13C(2)@N-term		0.000114034	830.487	416.251	830.487	416.251	2														1066.24	273.78	38482	1959.5
P00360	Glyceraldehyde-3-phosphate dehydrogenase 1	LTGMAFR	0	97	Dimethyl:2H(6)13C(2)@N-term		0.000114034	830.487	416.251	830.487	416.251	2														1066.24	273.64	38482	1959.28
P00360	Glyceraldehyde-3-phosphate dehydrogenase 1	IVSNASCTTNCLAPLAK	0	99	Dimethyl:2H(6)13C(2)@N-term; Deamidated(N)@4; Carbamidomethyl(C)@7; Carbamidomethyl(C)@11; Dimethyl:2H(6)13C(2)(K)@17		0.000229467	1892.03	947.024	1892.03	947.023	2														0	0	2260.08	328.37
P00360	Glyceraldehyde-3-phosphate dehydrogenase 1	IVSNASCTTNCLAPLAK	0	99	Dimethyl:2H(6)13C(2)@N-term; Deamidated(N)@4; Carbamidomethyl(C)@7; Carbamidomethyl(C)@11; Dimethyl:2H(6)13C(2)(K)@17		0.000229467	1892.03	947.024	1892.03	947.023	2														0	0	2260.08	328.26
P00360	Glyceraldehyde-3-phosphate dehydrogenase 1	VPTVDVSVVDLTVK	0	99	Dimethyl@N-term; Dimethyl(K)@14		0.000133808	1525.9	763.956	1525.9	763.956	2														0	0	18301.5	1076.86
P00360	Glyceraldehyde-3-phosphate dehydrogenase 1	IDVAVDSTGVFK	0	99	Dimethyl@N-term; Dimethyl(K)@12		8.67e-05	1305.72	653.866	1305.72	653.866	2														330.39	145.44	27330.2	1321.8
P00360	Glyceraldehyde-3-phosphate dehydrogenase 1	VINDAFGIEEGLMTTVHSMTATQK	0	99	Dimethyl@N-term; Oxidation(M)@13; Dimethyl(K)@24		0.000143049	2664.31	667.086	2664.31	667.086	4														0	0	649.79	184.67
P00360	Glyceraldehyde-3-phosphate dehydrogenase 1	VINDAFGIEEGLMTTVHSM	2	99	Dimethyl@N-term	cleaved M-T@C-term	0.000109846	2091	698.008	2091	698.008	3														322.86	105.08	1062.7	229.63
P00360	Glyceraldehyde-3-phosphate dehydrogenase 1	VINDAFGIEEGLMTTVHSM	0	96	Dimethyl@N-term	cleaved M-T@C-term	0.000109846	2091	698.008	2091	698.008	3														322.86	105.12	1062.7	229.71
P00360	Glyceraldehyde-3-phosphate dehydrogenase 1	LISWYDNEYGYSAR	0	99	Dimethyl:2H(6)13C(2)@N-term		4.91e-05	1771.86	886.937	1771.86	886.937	2														705.76	221.22	14662.8	961.01
P00360	Glyceraldehyde-3-phosphate dehydrogenase 1	IDVAVDSTGVFK	2	99	Dimethyl@N-term; Dimethyl(K)@12		-3.54e-05	1305.72	653.866	1305.72	653.866	2														346.89	146.73	39790.5	1600.57
P00360	Glyceraldehyde-3-phosphate dehydrogenase 1	IDVAVDSTGVFK	0	99	Dimethyl@N-term; Dimethyl(K)@12		-3.54e-05	1305.72	653.866	1305.72	653.866	2														345.81	149.53	39790.5	1599.04
P00360	Glyceraldehyde-3-phosphate dehydrogenase 1	IDVAVDSTGVFK	0	99	Dimethyl@N-term; Dimethyl(K)@12		-3.54e-05	1305.72	653.866	1305.72	653.866	2														346.89	147.34	39790.5	1599.26
P00360	Glyceraldehyde-3-phosphate dehydrogenase 1	IDVAVDSTGVFK	0	99	Dimethyl@N-term; Dimethyl(K)@12		-3.54e-05	1305.72	653.866	1305.72	653.866	2														346.89	146.82	40716.9	1592.47
P00360	Glyceraldehyde-3-phosphate dehydrogenase 1	IVSNASCTTNCLAPLAK	0	99	Dimethyl:2H(6)13C(2)@N-term; Carbamidomethyl(C)@7; Deamidated(N)@10; Carbamidomethyl(C)@11; Dimethyl:2H(6)13C(2)(K)@17		-5.35e-05	1892.03	631.685	1892.03	631.685	3														0	0	6117.13	788.88
P00360	Glyceraldehyde-3-phosphate dehydrogenase 1	IVSNASCTTNCLAPLAK	0	99	Dimethyl:2H(6)13C(2)@N-term; Carbamidomethyl(C)@7; Deamidated(N)@10; Carbamidomethyl(C)@11; Dimethyl:2H(6)13C(2)(K)@17		-5.35e-05	1892.03	631.685	1892.03	631.685	3														0	0	6117.13	789.08
P00360	Glyceraldehyde-3-phosphate dehydrogenase 1	VPTVDVSVVDLTVK	0	70	Dimethyl@N-term; Dimethyl(K)@14		-0.000110333	1525.9	763.956	1525.9	763.956	2														0	0	4151.59	437.23
P00360	Glyceraldehyde-3-phosphate dehydrogenase 1	VVITAPSSSAPMFVVGVNHTK	2	99	Dimethyl@N-term; Deamidated(N)@18; Dimethyl(K)@21		-0.000167038	2197.18	733.401	2197.18	733.401	3														0	0	2699.05	398.9
P00360	Glyceraldehyde-3-phosphate dehydrogenase 1	VVITAPSSSAPMFVVGVNHTK	0	99	Dimethyl@N-term; Deamidated(N)@18; Dimethyl(K)@21		-0.000184943	2197.18	550.303	2197.18	550.303	4														0	0	954.68	237.43
P00360	Glyceraldehyde-3-phosphate dehydrogenase 1	VVDLIEYVAK	0	99	Dimethyl@N-term; Dimethyl(K)@10		-0.000110609	1203.71	602.863	1203.71	602.863	2														219.88	115.78	46327.1	1674
P00360	Glyceraldehyde-3-phosphate dehydrogenase 1	IDVAVDSTGVFK	0	99	Dimethyl:2H(6)13C(2)@N-term; Dimethyl:2H(6)13C(2)(K)@12		-0.000141763	1321.81	661.911	1321.81	661.911	2														0	0	5637.59	572.31
P00360	Glyceraldehyde-3-phosphate dehydrogenase 1	IDVAVDSTGVFK	0	99	Delta:H(2)C(2)@N-term; Dimethyl(K)@12		-0.000142416	1303.7	652.858	1303.7	652.858	2														168.9	96.58	52.31	54.27
P00360	Glyceraldehyde-3-phosphate dehydrogenase 1	IDVAVDSTGVFK	0	99	Delta:H(2)C(2)@N-term; Dimethyl(K)@12		-0.000142416	1303.7	652.858	1303.7	652.858	2														168.9	96.51	52.31	54.27
P00360	Glyceraldehyde-3-phosphate dehydrogenase 1	IVSNASCTTNCLAPLAK	0	99	Dimethyl:2H(6)13C(2)@N-term; Carbamidomethyl(C)@7; Deamidated(N)@10; Carbamidomethyl(C)@11; Dimethyl:2H(6)13C(2)(K)@17		-0.000236564	1892.03	631.685	1892.03	631.685	3														291.06	138.91	6656.41	647.09
P00360	Glyceraldehyde-3-phosphate dehydrogenase 1	IVSNASCTTNCLAPLAK	0	99	Dimethyl:2H(6)13C(2)@N-term; Carbamidomethyl(C)@7; Deamidated(N)@10; Carbamidomethyl(C)@11; Dimethyl:2H(6)13C(2)(K)@17		-0.000258815	1892.03	947.023	1892.03	947.023	2														0	0	1526.48	402.89
P00360	Glyceraldehyde-3-phosphate dehydrogenase 1	IVSNASCTTNCLAPLAK	0	99	Dimethyl:2H(6)13C(2)@N-term; Carbamidomethyl(C)@7; Deamidated(N)@10; Carbamidomethyl(C)@11; Dimethyl:2H(6)13C(2)(K)@17		-0.000258815	1892.03	947.023	1892.03	947.023	2														0	0	1526.48	403.18
P00360	Glyceraldehyde-3-phosphate dehydrogenase 1	VPTVDVSVVDLTVK	0	99	Dimethyl:2H(6)13C(2)@N-term; Dimethyl:2H(6)13C(2)(K)@14		-0.000224559	1541.99	772	1541.99	772	2														0	0	18381	1078.78
P00360	Glyceraldehyde-3-phosphate dehydrogenase 1	VPTVDVSVVDLTVK	0	99	Dimethyl:2H(6)13C(2)@N-term; Dimethyl:2H(6)13C(2)(K)@14		-0.000224559	1541.99	772	1541.99	772	2														0	0	18381	1079.59
P00360	Glyceraldehyde-3-phosphate dehydrogenase 1	VPTVDVSVVDLTVK	0	99	Dimethyl:2H(6)13C(2)@N-term; Dimethyl:2H(6)13C(2)(K)@14		-0.000224559	1541.99	772	1541.99	772	2														0	0	18381	1079.51
P00360	Glyceraldehyde-3-phosphate dehydrogenase 1	VPTVDVSVVDLTVK	0	99	Dimethyl:2H(6)13C(2)@N-term; Dimethyl:2H(6)13C(2)(K)@14		-0.000224559	1541.99	772	1541.99	772	2														0	0	18303	1076.49
P00360	Glyceraldehyde-3-phosphate dehydrogenase 1	DIEVVAVNDPFISNDYAAYMVK	0	99	Dimethyl@N-term; Dimethyl(K)@22		-0.000370878	2528.25	843.757	2528.25	843.758	3														215.49	94.57	9887.01	640.38
P00360	Glyceraldehyde-3-phosphate dehydrogenase 1	DIEVVAVNDPFISNDYAAYMVK	0	99	Dimethyl@N-term; Dimethyl(K)@22		-0.000370878	2528.25	843.757	2528.25	843.758	3														215.49	94.52	9887.01	640.46
P00360	Glyceraldehyde-3-phosphate dehydrogenase 1	DIEVVAVNDPFISNDYAAYMVK	0	99	Dimethyl:2H(6)13C(2)@N-term; Dimethyl:2H(6)13C(2)(K)@22		-0.000386283	2544.34	849.12	2544.34	849.12	3														234.93	98.64	10961.4	673.33
P00360	Glyceraldehyde-3-phosphate dehydrogenase 1	DIEVVAVNDPFISNDYAAYMVK	0	99	Dimethyl:2H(6)13C(2)@N-term; Dimethyl:2H(6)13C(2)(K)@22		-0.000386283	2544.34	849.12	2544.34	849.12	3														234.93	98.59	10961.4	673.42
P00360	Glyceraldehyde-3-phosphate dehydrogenase 1	DIEVVAVNDPFISNDYAAYMVK	0	99	Dimethyl:2H(6)13C(2)@N-term; Dimethyl:2H(6)13C(2)(K)@22		-0.000386283	2544.34	849.12	2544.34	849.12	3														234.93	98.58	10961.4	673.4
P00360	Glyceraldehyde-3-phosphate dehydrogenase 1	VINDAFGIEEGLMTTVH	2	99	Dimethyl@N-term	cleaved H-S@C-term	-0.00033614	1872.93	625.317	1872.93	625.317	3														379.84	133.53	4903.91	452.69
P00360	Glyceraldehyde-3-phosphate dehydrogenase 1	VINDAFGIEEGLMTTVH	0	99	Dimethyl@N-term	cleaved H-S@C-term	-0.00033614	1872.93	625.317	1872.93	625.317	3														379.84	133.63	4903.91	452.94
P00360	Glyceraldehyde-3-phosphate dehydrogenase 1	VINDAFGIEEGLMTTVH	0	99	Dimethyl@N-term	cleaved H-S@C-term	-0.000427812	1872.93	625.317	1872.93	625.317	3														368.79	131.82	4905.01	453.08
P00360	Glyceraldehyde-3-phosphate dehydrogenase 1	LISWYDNEYGYSAR	0	99	Dimethyl:2H(6)13C(2)@N-term		-0.000426842	1771.86	591.627	1771.86	591.627	3														923.89	241.46	16667.9	1024.7
P00360	Glyceraldehyde-3-phosphate dehydrogenase 1	LISWYDNEYGYSAR	0	99	Dimethyl:2H(6)13C(2)@N-term		-0.000426842	1771.86	591.627	1771.86	591.627	3														923.89	241.46	16667.9	1024.68
P00360	Glyceraldehyde-3-phosphate dehydrogenase 1	LISWYDNEYGYSAR	0	99	Dimethyl:2H(6)13C(2)@N-term		-0.000426842	1771.86	591.627	1771.86	591.627	3														923.89	241.83	16667.9	1024.77
P00360	Glyceraldehyde-3-phosphate dehydrogenase 1	PSSTGAAK	0	98	No Dimethyl@N-term; Dimethyl(K)@8	cleaved I-P@N-term	-0.000226475	745.397	373.706	745.397	373.706	2														92.36	67.69	1169.92	240.87
P00360	Glyceraldehyde-3-phosphate dehydrogenase 1	PSSTGAAK	0	87	No Dimethyl@N-term; Dimethyl(K)@8	cleaved I-P@N-term	-0.000226475	745.397	373.706	745.397	373.706	2														92.36	67.7	1169.92	240.76
P00360	Glyceraldehyde-3-phosphate dehydrogenase 1	TASGNIIPSSTGAAK	0	99	Dimethyl@N-term; Deamidated(N)@5; Dimethyl(K)@15		-0.000446525	1430.76	716.388	1430.76	716.388	2														149.6	87.5	1298.17	248.79
P00360	Glyceraldehyde-3-phosphate dehydrogenase 1	TASGNIIPSSTGAAK	0	99	Dimethyl:2H(6)13C(2)@N-term; Dimethyl:2H(6)13C(2)(K)@15		-0.00049333	1445.87	723.94	1445.87	723.94	2														1811.28	285.43	63464.7	1689.18
P00360	Glyceraldehyde-3-phosphate dehydrogenase 1	VLPELQGK	0	99	Dimethyl@N-term; Dimethyl(K)@8		-0.000353778	938.58	470.297	938.58	470.297	2														0	0	164843	5657.28
P00360	Glyceraldehyde-3-phosphate dehydrogenase 1	VLPELQGK	0	99	Dimethyl@N-term; Dimethyl(K)@8		-0.000353778	938.58	470.297	938.58	470.297	2														0	0	164843	5657.36
P00360	Glyceraldehyde-3-phosphate dehydrogenase 1	VLPELQGK	0	87	Dimethyl@N-term; Dimethyl(K)@8		-0.000353778	938.58	470.297	938.58	470.297	2														0	0	164843	5657.28
P00360	Glyceraldehyde-3-phosphate dehydrogenase 1	LISWYDNEYGY	0	98	Delta:H(2)C(2)@N-term	cleaved Y-S@C-term	-0.000549215	1447.63	724.822	1447.63	724.822	2
P00360	Glyceraldehyde-3-phosphate dehydrogenase 1	VVITAPSSSAPMFVVGVNHTK	0	99	Dimethyl:2H(6)13C(2)@N-term; Deamidated(N)@18; Dimethyl:2H(6)13C(2)(K)@21		-0.00084727	2213.27	738.764	2213.27	738.764	3														0	0	2597.34	391.4
P00360	Glyceraldehyde-3-phosphate dehydrogenase 1	VVITAPSSSAPMFVVGVNHTK	0	65	Dimethyl:2H(6)13C(2)@N-term; Deamidated(N)@18; Dimethyl:2H(6)13C(2)(K)@21		-0.00084727	2213.27	738.764	2213.27	738.764	3														0	0	2597.34	391.31
P00360	Glyceraldehyde-3-phosphate dehydrogenase 1	TASGNIIPSSTGAAK	0	98	No Dimethyl@N-term; Dimethyl:2H(6)13C(2)(K)@15		-0.000556609	1409.79	470.937	1409.79	470.938	3														164.88	81	4363.02	380.9
P00360	Glyceraldehyde-3-phosphate dehydrogenase 1	IATYQER	1	97	Dimethyl@N-term		-0.00036732	907.476	454.745	907.476	454.745	2														0	0	103.1	35.16
P00360	Glyceraldehyde-3-phosphate dehydrogenase 1	IATYQERDPANLPWGSLK	2	99	Dimethyl@N-term; Dimethyl(K)@18	missed R-D@7	-0.000933835	2114.11	705.712	2114.12	705.713	3														21.71	37.62	4150.46	531.7
P00360	Glyceraldehyde-3-phosphate dehydrogenase 1	DPANLPWGSLK	0	70	Dimethyl:2H(6)13C(2)@N-term; Dimethyl:2H(6)13C(2)(K)@11		-0.000584552	1268.77	423.93	1268.77	423.931	3														0	0	4337.15	556.32
P00360	Glyceraldehyde-3-phosphate dehydrogenase 1	IDVAVDSTGVFK	0	99	Dimethyl:2H(6)13C(2)@N-term; Dimethyl:2H(6)13C(2)(K)@12		-0.000630045	1321.81	661.91	1321.81	661.911	2														0	0	1160.82	271.66
P00360	Glyceraldehyde-3-phosphate dehydrogenase 1	DPANLPWGSLK	2	99	Dimethyl@N-term; Dimethyl(K)@11		-0.000613061	1252.68	627.348	1252.68	627.348	2														151.8	107.33	52492.8	1937.09
P00360	Glyceraldehyde-3-phosphate dehydrogenase 1	DPANLPWGSLK	0	99	Dimethyl@N-term; Dimethyl(K)@11		-0.000613061	1252.68	627.348	1252.68	627.348	2														0	0	52492.8	1936.82
P00360	Glyceraldehyde-3-phosphate dehydrogenase 1	DPANLPWGSLK	0	99	Dimethyl@N-term; Dimethyl(K)@11		-0.000613061	1252.68	627.348	1252.68	627.348	2														0	0	52492.8	1936.85
P00360	Glyceraldehyde-3-phosphate dehydrogenase 1	DIEVVAVNDPFISNDYAAY	0	99	Dimethyl:2H(6)13C(2)@N-term	cleaved Y-M@C-term	-0.00114837	2150.06	1076.04	2150.06	1076.04	2														107.96	67.97	1675.28	261.55
P00360	Glyceraldehyde-3-phosphate dehydrogenase 1	LISWYDNEYGY	0	99	Dimethyl@N-term	cleaved Y-S@C-term	-0.000857944	1449.64	725.83	1449.65	725.83	2														489.48	159.72	7069.14	606.74
P00360	Glyceraldehyde-3-phosphate dehydrogenase 1	LISWYDNEYGY	0	98	Dimethyl@N-term	cleaved Y-S@C-term	-0.000857944	1449.64	725.83	1449.65	725.83	2														489.48	159.71	7069.14	606.72
P00360	Glyceraldehyde-3-phosphate dehydrogenase 1	LISWYDNEYGY	0	84	Dimethyl@N-term	cleaved Y-S@C-term	-0.000857944	1449.64	725.83	1449.65	725.83	2														489.48	159.72	7069.14	606.71
P00360	Glyceraldehyde-3-phosphate dehydrogenase 1	DIEVVAVNDPFISNDYAAYMVK	0	83	Dimethyl:2H(6)13C(2)@N-term; Cation:Na(D)@9; Dimethyl:2H(6)13C(2)(K)@22		-0.00164573	2566.32	856.447	2566.32	856.448	3														200.46	92.22	434.5	134.23
P00360	Glyceraldehyde-3-phosphate dehydrogenase 1	IDVAVDSTGVFK	0	99	Dimethyl@N-term; Dimethyl(K)@12		-0.000889872	1305.72	653.866	1305.72	653.866	2														0	0	4208.63	477.13
P00360	Glyceraldehyde-3-phosphate dehydrogenase 1	DPANLPWGSLK	0	99	Dimethyl@N-term; Dimethyl(K)@11		-0.000857202	1252.68	627.348	1252.68	627.348	2														151.53	107.23	46585.7	1875.46
P00360	Glyceraldehyde-3-phosphate dehydrogenase 1	VLPELQGK	0	99	Dimethyl:2H(6)13C(2)@N-term; Dimethyl:2H(6)13C(2)(K)@8		-0.000656322	954.668	478.341	954.669	478.342	2														0	0	180689	5921.5
P00360	Glyceraldehyde-3-phosphate dehydrogenase 1	VLPELQGK	0	97	Dimethyl:2H(6)13C(2)@N-term; Dimethyl:2H(6)13C(2)(K)@8		-0.000656322	954.668	478.341	954.669	478.342	2														0	0	180689	5921.56
P00360	Glyceraldehyde-3-phosphate dehydrogenase 1	VLPELQGK	0	87	Dimethyl:2H(6)13C(2)@N-term; Dimethyl:2H(6)13C(2)(K)@8		-0.000656322	954.668	478.341	954.669	478.342	2														0	0	180689	5921.44
P00360	Glyceraldehyde-3-phosphate dehydrogenase 1	VLPELQGK	0	66	Dimethyl:2H(6)13C(2)@N-term; Dimethyl:2H(6)13C(2)(K)@8		-0.000656322	954.668	478.341	954.669	478.342	2														0	0	180689	5921.4
P00360	Glyceraldehyde-3-phosphate dehydrogenase 1	VLPELQGK	0	62	Dimethyl:2H(6)13C(2)@N-term; Dimethyl:2H(6)13C(2)(K)@8		-0.000656322	954.668	478.341	954.669	478.342	2														0	0	180689	5921.48
P00360	Glyceraldehyde-3-phosphate dehydrogenase 1	TASGNIIPSSTGAAK	0	98	Dimethyl:2H(6)13C(2)@N-term; Dimethyl:2H(6)13C(2)(K)@15		-0.00111292	1445.87	482.962	1445.87	482.963	3														1370.78	260.34	38916	1387.27
P00360	Glyceraldehyde-3-phosphate dehydrogenase 1	TASGNIIPSSTGAAK	0	98	Dimethyl:2H(6)13C(2)@N-term; Dimethyl:2H(6)13C(2)(K)@15		-0.00111292	1445.87	482.962	1445.87	482.963	3														1370.78	260.49	38916	1387.11
P00360	Glyceraldehyde-3-phosphate dehydrogenase 1	DIEVVAVNDPFISNDYAAYMVK	0	99	Dimethyl@N-term; Deamidated(N)@14; Dimethyl(K)@22		-0.00202685	2529.23	844.085	2529.23	844.086	3														0	0	398.99	118.18
P00360	Glyceraldehyde-3-phosphate dehydrogenase 1	VVITAPSSSAPMFVVGVNHTK	0	99	Dimethyl@N-term; Deamidated(N)@18; Dimethyl(K)@21		-0.00177053	2197.18	733.401	2197.18	733.401	3														0	0	2368.75	374.04
P00360	Glyceraldehyde-3-phosphate dehydrogenase 1	VVITAPSSSAPMFVVGVNHTK	0	99	Dimethyl@N-term; Deamidated(N)@18; Dimethyl(K)@21		-0.00177053	2197.18	733.401	2197.18	733.401	3														0	0	2368.75	374
P00360	Glyceraldehyde-3-phosphate dehydrogenase 1	VVITAPSSSAPMFVVGVNHTK	0	99	Dimethyl@N-term; Deamidated(N)@18; Dimethyl(K)@21		-0.00177053	2197.18	733.401	2197.18	733.401	3														0	0	2368.75	374.09
P00360	Glyceraldehyde-3-phosphate dehydrogenase 1	ASCTTNCLAPLAK	2	99	Dimethyl@N-term; Carbamidomethyl(C)@3; Carbamidomethyl(C)@7; Dimethyl(K)@13	cleaved N-A@N-term	-0.00125201	1461.73	731.873	1461.73	731.873	2														43.54	47.07	434.72	149.72
P00360	Glyceraldehyde-3-phosphate dehydrogenase 1	VLPELQGK	0	60	Dimethyl:2H(6)13C(2)@N-term; Dimethyl:2H(6)13C(2)(K)@8		-0.000839428	954.668	478.341	954.669	478.342	2														479.89	305.49	174747	5823.22
P00360	Glyceraldehyde-3-phosphate dehydrogenase 1	VLPELQGK	0	54	Delta:H(2)C(2)@N-term; Dimethyl(K)@8		-0.000851271	936.564	469.289	936.564	469.289	2														0	0	162.94	94.66
P00360	Glyceraldehyde-3-phosphate dehydrogenase 1	VLPELQGK	0	33	Delta:H(2)C(2)@N-term; Dimethyl(K)@8		-0.000851271	936.564	469.289	936.564	469.289	2														0	0	146.4	90.02
P00360	Glyceraldehyde-3-phosphate dehydrogenase 1	VPTVDVSVVDLTVK	0	65	Dimethyl:2H(6)13C(2)@N-term; Dimethyl:2H(6)13C(2)(K)@14		-0.00144526	1541.98	771.999	1541.99	772	2														0	0	5799.85	559.98
P00360	Glyceraldehyde-3-phosphate dehydrogenase 1	IAINGFGR	0	35	Dimethyl:2H(6)13C(2)@N-term		-0.000878872	882.546	442.28	882.547	442.281	2														1358.44	301.22	8847.58	738.21
P00360	Glyceraldehyde-3-phosphate dehydrogenase 1	DPANLPWGSLK	0	99	Dimethyl:2H(6)13C(2)@N-term; Dimethyl:2H(6)13C(2)(K)@11		-0.00132999	1268.77	635.392	1268.77	635.392	2														146.53	105.4	58308.6	2039.74
P00360	Glyceraldehyde-3-phosphate dehydrogenase 1	DPANLPWGSLK	0	99	Dimethyl:2H(6)13C(2)@N-term; Dimethyl:2H(6)13C(2)(K)@11		-0.00132999	1268.77	635.392	1268.77	635.392	2														146.53	105.48	58308.6	2039.84
P00360	Glyceraldehyde-3-phosphate dehydrogenase 1	DPANLPWGSLK	0	99	Dimethyl:2H(6)13C(2)@N-term; Dimethyl:2H(6)13C(2)(K)@11		-0.00132999	1268.77	635.392	1268.77	635.392	2														140.33	104.75	58208	2037.9
P00360	Glyceraldehyde-3-phosphate dehydrogenase 1	DPANLPWGSLK	0	99	Dimethyl:2H(6)13C(2)@N-term; Dimethyl:2H(6)13C(2)(K)@11		-0.00132999	1268.77	635.392	1268.77	635.392	2														0	0	58308.6	2039.78
P00360	Glyceraldehyde-3-phosphate dehydrogenase 1	DPANLPWGSLK	0	99	Dimethyl:2H(6)13C(2)@N-term; Dimethyl:2H(6)13C(2)(K)@11		-0.00132999	1268.77	635.392	1268.77	635.392	2														0	0	58308.6	2039.72
P00360	Glyceraldehyde-3-phosphate dehydrogenase 1	DPANLPWGSLK	0	90	Dimethyl:2H(6)13C(2)@N-term; Dimethyl:2H(6)13C(2)(K)@11		-0.00132999	1268.77	635.392	1268.77	635.392	2														0	0	58308.6	2039.85
P00360	Glyceraldehyde-3-phosphate dehydrogenase 1	IAINGFGR	0	56	Dimethyl@N-term		-0.000950376	874.502	438.258	874.503	438.259	2														1430.08	308.93	8159.19	709.42
P00360	Glyceraldehyde-3-phosphate dehydrogenase 1	VLPELQGK	0	88	Dimethyl:2H(6)13C(2)@N-term; Dimethyl:2H(6)13C(2)(K)@8		-0.00108357	954.668	478.341	954.669	478.342	2														1048.56	232.46	3147.79	416.63
P00360	Glyceraldehyde-3-phosphate dehydrogenase 1	VPTVDVSVVDLTVK	0	99	Dimethyl:2H(6)13C(2)@N-term; Dimethyl:2H(6)13C(2)(K)@14		-0.00181147	1541.98	771.999	1541.99	772	2														0	0	15023.2	928.84
P00360	Glyceraldehyde-3-phosphate dehydrogenase 1	DIEVVAVNDPFISNDYAAYMVK	2	99	Delta:H(2)C(2)@N-term; Dimethyl(K)@22		-0.00308986	2526.23	843.085	2526.24	843.086	3														0	0	0	0
P00360	Glyceraldehyde-3-phosphate dehydrogenase 1	DIEVVAVNDPFISNDYAAYMVK	0	99	Delta:H(2)C(2)@N-term; Dimethyl(K)@22		-0.00308986	2526.23	843.085	2526.24	843.086	3														0	0	0	0
P00360	Glyceraldehyde-3-phosphate dehydrogenase 1	VPTVDVSVVDLTVK	0	99	Dimethyl@N-term; Dimethyl(K)@14		-0.00206346	1525.89	763.955	1525.9	763.956	2														0	0	9234.45	711.29
P00360	Glyceraldehyde-3-phosphate dehydrogenase 1	TASGNIIPSSTGAAK	0	99	Delta:H(2)C(2)@N-term; Dimethyl(K)@15		-0.00201421	1427.76	714.887	1427.76	714.888	2														496.25	164.45	6800.25	731.85
P00360	Glyceraldehyde-3-phosphate dehydrogenase 1	LISWYDNEYGYSAR	0	99	Delta:H(2)C(2)@N-term		-0.00261152	1761.8	881.906	1761.8	881.907	2
P00360	Glyceraldehyde-3-phosphate dehydrogenase 1	DIEVVAVNDPFISNDYAAYMVK	0	99	Dimethyl@N-term; Oxidation(M)@20; Dimethyl(K)@22		-0.00378947	2544.24	849.088	2544.25	849.089	3														0	0	1299.26	227.95
P00360	Glyceraldehyde-3-phosphate dehydrogenase 1	DIEVVAVNDPFISNDYAAYMVK	0	99	Dimethyl@N-term; Oxidation(M)@20; Dimethyl(K)@22		-0.00378947	2544.24	849.088	2544.25	849.089	3														0	0	1299.26	227.99
P00360	Glyceraldehyde-3-phosphate dehydrogenase 1	VINDAFGIEEGLMTTVHSMTATQK	0	99	Dimethyl:2H(6)13C(2)@N-term; Dimethyl:2H(6)13C(2)(K)@24		-0.00408314	2664.4	667.108	2664.41	667.109	4														569.53	259.46	3164.77	556.63
P00360	Glyceraldehyde-3-phosphate dehydrogenase 1	LISWYDNEYGY	1	99	Dimethyl:2H(6)13C(2)@N-term	cleaved Y-S@C-term	-0.0022579	1457.69	729.851	1457.69	729.852	2														489.48	159.71	7069.14	606.72
P00360	Glyceraldehyde-3-phosphate dehydrogenase 1	LISWYDNEYGY	0	93	Dimethyl:2H(6)13C(2)@N-term	cleaved Y-S@C-term	-0.0022579	1457.69	729.851	1457.69	729.852	2														489.48	159.71	7069.14	606.72
P00360	Glyceraldehyde-3-phosphate dehydrogenase 1	IVSNASCTTNCLAPLAK	0	33	Dimethyl@N-term; Carbamidomethyl(C)@7; Deamidated(N)@10; Carbamidomethyl(C)@11; Dimethyl(K)@17		-0.00300642	1875.94	626.321	1875.94	626.322	3														334.03	141.63	5622.04	595.56
P00360	Glyceraldehyde-3-phosphate dehydrogenase 1	VINDAFGIEEGLMTTVH	0	19	Dimethyl@N-term	cleaved H-S@C-term	-0.00302534	1872.93	937.47	1872.93	937.472	2														158.12	89.22	328.68	131.14
P00360	Glyceraldehyde-3-phosphate dehydrogenase 1	IVSNASCTTNCLAPLAK	0	99	Delta:H(2)C(2)@N-term; Deamidated(N)@4; Carbamidomethyl(C)@7; Carbamidomethyl(C)@11; Dimethyl(K)@17		-0.00304515	1873.92	625.649	1873.93	625.65	3														479.34	166.57	4554.77	509.15
P00360	Glyceraldehyde-3-phosphate dehydrogenase 1	IDVAVDSTGVFK	0	99	Dimethyl:2H(6)13C(2)@N-term; Dimethyl:2H(6)13C(2)(K)@12		-0.00221696	1321.8	661.909	1321.81	661.911	2														265.78	129.47	42950.3	1660.34
P00360	Glyceraldehyde-3-phosphate dehydrogenase 1	IDVAVDSTGVFK	0	99	Dimethyl:2H(6)13C(2)@N-term; Dimethyl:2H(6)13C(2)(K)@12		-0.00221696	1321.8	661.909	1321.81	661.911	2														265.78	129	42950.3	1661.48
P00360	Glyceraldehyde-3-phosphate dehydrogenase 1	IDVAVDSTGVFK	0	99	Dimethyl:2H(6)13C(2)@N-term; Dimethyl:2H(6)13C(2)(K)@12		-0.00221696	1321.8	661.909	1321.81	661.911	2														265.78	128.94	42950.3	1661.41
P00360	Glyceraldehyde-3-phosphate dehydrogenase 1	IDVAVDSTGVFK	0	99	Dimethyl:2H(6)13C(2)@N-term; Dimethyl:2H(6)13C(2)(K)@12		-0.00221696	1321.8	661.909	1321.81	661.911	2														265.78	128.94	42950.3	1661.6
P00360	Glyceraldehyde-3-phosphate dehydrogenase 1	IDVAVDSTGVFK	0	99	Dimethyl:2H(6)13C(2)@N-term; Dimethyl:2H(6)13C(2)(K)@12		-0.00221696	1321.8	661.909	1321.81	661.911	2														262.37	128	42515.7	1651.81
P00360	Glyceraldehyde-3-phosphate dehydrogenase 1	VPTVDVSVVDLTVK	0	99	Dimethyl:2H(6)13C(2)@N-term; Dimethyl:2H(6)13C(2)(K)@14		-0.0026048	1541.98	515.002	1541.99	515.002	3														0	0	4087.58	472.14
P00360	Glyceraldehyde-3-phosphate dehydrogenase 1	IDVAVDSTGVFK	0	99	Dimethyl:2H(6)13C(2)@N-term; Dimethyl:2H(6)13C(2)(K)@12		-0.00233903	1321.8	661.909	1321.81	661.911	2														369.9	150.94	38227.9	1531.81
P00360	Glyceraldehyde-3-phosphate dehydrogenase 1	IDVAVDSTGVFK	0	99	Dimethyl:2H(6)13C(2)@N-term; Dimethyl:2H(6)13C(2)(K)@12		-0.00233903	1321.8	661.909	1321.81	661.911	2														262.32	124.93	13535.9	896.22
P00360	Glyceraldehyde-3-phosphate dehydrogenase 1	IVSNASCTTNCLAPLAK	0	99	Dimethyl@N-term; Carbamidomethyl(C)@7; Deamidated(N)@10; Carbamidomethyl(C)@11; Dimethyl(K)@17		-0.00337263	1875.94	626.321	1875.94	626.322	3														461.65	166.72	5622.04	595.64
P00360	Glyceraldehyde-3-phosphate dehydrogenase 1	IVSNASCTTNCLAPLAK	0	99	Dimethyl@N-term; Deamidated(N)@4; Carbamidomethyl(C)@7; Carbamidomethyl(C)@11; Dimethyl(K)@17		-0.00337263	1875.94	626.321	1875.94	626.322	3														461.65	166.65	5705.64	599.69
P00360	Glyceraldehyde-3-phosphate dehydrogenase 1	IVSNASCTTNCLAPLAK	0	99	Dimethyl@N-term; Deamidated(N)@4; Carbamidomethyl(C)@7; Carbamidomethyl(C)@11; Dimethyl(K)@17		-0.00337263	1875.94	626.321	1875.94	626.322	3														461.65	166.88	5622.04	595.53
P00360	Glyceraldehyde-3-phosphate dehydrogenase 1	VINDAFGIEEGLMTTVHSMTATQK	0	88	Dimethyl:2H(6)13C(2)@N-term; Oxidation(M)@13; Dimethyl:2H(6)13C(2)(K)@24		-0.00522005	2680.4	894.473	2680.4	894.475	3														0	0	910.96	218.67
P00360	Glyceraldehyde-3-phosphate dehydrogenase 1	TASGNIIPSSTGAAK	2	99	Dimethyl@N-term; Dimethyl(K)@15		-0.00300737	1429.77	715.895	1429.78	715.896	2														112.81	94.9	2082.63	560.63
P00360	Glyceraldehyde-3-phosphate dehydrogenase 1	TASGNIIPSSTGAAK	0	99	Dimethyl@N-term; Dimethyl(K)@15		-0.00300737	1429.77	715.895	1429.78	715.896	2														114.28	95.48	2082.63	560.06
P00360	Glyceraldehyde-3-phosphate dehydrogenase 1	IDVAVDSTGVFK	0	99	Dimethyl:2H(6)13C(2)@N-term; Dimethyl:2H(6)13C(2)(K)@12		-0.00294938	1321.8	661.909	1321.81	661.911	2														0	0	3502.74	453.47
P00360	Glyceraldehyde-3-phosphate dehydrogenase 1	DIEVVAVNDPFISNDYAAYMVK	0	99	Dimethyl:2H(6)13C(2)@N-term; Oxidation(M)@20; Dimethyl:2H(6)13C(2)(K)@22		-0.00618528	2560.33	854.45	2560.33	854.452	3														0	0	1508.58	245.11
P00360	Glyceraldehyde-3-phosphate dehydrogenase 1	IVSNASCTTNCLAPLAK	0	99	Dimethyl:2H(6)13C(2)@N-term; Carbamidomethyl(C)@7; Deamidated(N)@10; Carbamidomethyl(C)@11; Dimethyl:2H(6)13C(2)(K)@17		-0.00477542	1892.03	947.021	1892.03	947.023	2														0	0	1580.35	315.11
P00360	Glyceraldehyde-3-phosphate dehydrogenase 1	IVSNASCTTNCLAPLAK	0	99	Dimethyl:2H(6)13C(2)@N-term; Deamidated(N)@4; Carbamidomethyl(C)@7; Carbamidomethyl(C)@11; Dimethyl:2H(6)13C(2)(K)@17		-0.00477542	1892.03	947.021	1892.03	947.023	2														0	0	1580.35	315.11
P00360	Glyceraldehyde-3-phosphate dehydrogenase 1	IVSNASCTTNCLAPLAK	0	99	Dimethyl:2H(6)13C(2)@N-term; Deamidated(N)@4; Carbamidomethyl(C)@7; Carbamidomethyl(C)@11; Dimethyl:2H(6)13C(2)(K)@17		-0.00477542	1892.03	947.021	1892.03	947.023	2														0	0	1580.35	315.24
P00360	Glyceraldehyde-3-phosphate dehydrogenase 1	LTGMAFR	0	86	Delta:H(2)C(2)@N-term; Oxidation(M)@4		-0.00214262	836.419	419.217	836.421	419.218	2
P00360	Glyceraldehyde-3-phosphate dehydrogenase 1	GTVSHDDKHIIIDGVK	2	99	Dimethyl@N-term; Dimethyl(K)@8; Dimethyl(K)@16	missed K-H@8	-0.00478921	1817	455.257	1817	455.258	4														0	0	445.17	99.15
P00360	Glyceraldehyde-3-phosphate dehydrogenase 1	DASAGIQLSPK	2	99	Dimethyl@N-term; Dimethyl(K)@11	cleaved F-D@N-term	-0.00363354	1141.63	571.823	1141.63	571.824	2														130.59	134.41	355.51	199.45
P00360	Glyceraldehyde-3-phosphate dehydrogenase 1	VINDAFGIEEGLMTTVHSMTATQK	0	93	Dimethyl:2H(6)13C(2)@N-term; Oxidation(M)@13; Dimethyl:2H(6)13C(2)(K)@24		-0.00853784	2680.39	671.106	2680.4	671.108	4														0	0	649.79	184.72
P00360	Glyceraldehyde-3-phosphate dehydrogenase 1	IDVAVDSTGVFK	0	99	Dimethyl:2H(6)13C(2)@N-term; Dimethyl:2H(6)13C(2)(K)@12		-0.00502458	1321.8	661.908	1321.81	661.911	2														0	0	2411.35	407.65
P00360	Glyceraldehyde-3-phosphate dehydrogenase 1	KDIEVVAVNDPFISNDYAAY	1	97	Dimethyl:2H(6)13C(2)@N-term; Dimethyl:2H(6)13C(2)(K)@1	cleaved Y-M@C-term; missed K-D@1	-0.0105092	2314.22	772.414	2314.23	772.418	3														267.99	119.45	679.4	192.13
P00360	Glyceraldehyde-3-phosphate dehydrogenase 1	VINDAFGIEEGLMTTVHSMTATQK	0	99	Dimethyl@N-term; Oxidation(M)@19; Dimethyl(K)@24		-0.0122117	2664.3	667.083	2664.31	667.086	4														0	0	350.46	137.13
P00360	Glyceraldehyde-3-phosphate dehydrogenase 1	DPANLPWGSLK	0	46	Dimethyl@N-term; Dimethyl(K)@11		-0.007449	1252.67	627.344	1252.68	627.348	2														83.87	72.51	423.11	145.05
P00360	Glyceraldehyde-3-phosphate dehydrogenase 1	TASGNIIPSSTGAAK	0	96	Dimethyl:2H(6)13C(2)@N-term; Dehydrated(T)@1; Deamidated(N)@5; Dimethyl:2H(6)13C(2)(K)@15		-0.013811	1428.83	715.42	1428.84	715.427	2														281.89	94.47	5345.17	406.92
P00360	Glyceraldehyde-3-phosphate dehydrogenase 1	KVLPELQGK	0	53	Dimethyl@N-term; Dimethyl(K)@1; Dimethyl(K)@9	cleaved G-K@N-term; missed K-V@1	-0.012428	1094.69	548.354	1094.71	548.36	2														693.97	177.29	0	0
P00360	Glyceraldehyde-3-phosphate dehydrogenase 1	IDVAVDSTGVFK	0	99	Dimethyl:2H(6)13C(2)@N-term; Dimethyl:2H(6)13C(2)(K)@12		-0.0245558	1321.78	661.898	1321.81	661.911	2														1025.63	235.35	650.18	197.13
P00360	Glyceraldehyde-3-phosphate dehydrogenase 1	TASGNIIPSSTGAAK	0	54	Dimethyl@N-term; Dimethyl(K)@15		-0.0298629	1429.75	715.881	1429.78	715.896	2														0	0	430.64	145.33
P00360	Glyceraldehyde-3-phosphate dehydrogenase 1	TASGNIIPSSTGAAK	0	99	Dimethyl:2H(6)13C(2)@N-term; Dimethyl:2H(6)13C(2)(K)@15		-1.00672	1444.86	723.437	1445.87	723.94	2														1736.6	293.13	60274.3	1726.26
P00360	Glyceraldehyde-3-phosphate dehydrogenase 1	TASGNIIPSSTGAAK	0	99	Dimethyl:2H(6)13C(2)@N-term; Dimethyl:2H(6)13C(2)(K)@15		-1.00672	1444.86	723.437	1445.87	723.94	2														1736.6	293.07	60274.3	1726.28
P00360	Glyceraldehyde-3-phosphate dehydrogenase 1	TASGNIIPSSTGAAK	0	99	Dimethyl:2H(6)13C(2)@N-term; Dimethyl:2H(6)13C(2)(K)@15		-1.00672	1444.86	723.437	1445.87	723.94	2														1736.6	293.12	60274.3	1726.51
P00360	Glyceraldehyde-3-phosphate dehydrogenase 1	TASGNIIPSSTGAAK	0	99	Dimethyl:2H(6)13C(2)@N-term; Dimethyl:2H(6)13C(2)(K)@15		-3.01796	1442.85	722.432	1445.87	723.94	2														516.39	213.99	0	0
P00360	Glyceraldehyde-3-phosphate dehydrogenase 1	TASGNIIPSSTGAAK	0	99	Dimethyl:2H(6)13C(2)@N-term; Dimethyl:2H(6)13C(2)(K)@15		-4.02553	1441.84	721.928	1445.87	723.94	2														1736.6	293.12	60274.3	1726.3
P00360	Glyceraldehyde-3-phosphate dehydrogenase 1	TASGNIIPSSTGAAK	0	99	Dimethyl:2H(6)13C(2)@N-term; Dimethyl:2H(6)13C(2)(K)@15		-4.02553	1441.84	721.928	1445.87	723.94	2														1736.6	293.13	60274.3	1726.28
P38116	ADP-ribosylation factor-like protein 1	ELNLVELK	1	96	Dimethyl:2H(6)13C(2)@N-term; Dimethyl:2H(6)13C(2)(K)@8		-0.000372564	1028.71	515.36	1028.71	515.36	2														0	0	698.9	169.59
P38116	ADP-ribosylation factor-like protein 1	QDQPGALSASEVSK	1	94	Dimethyl@N-term; Dimethyl(K)@14		-0.00083754	1471.75	736.883	1471.75	736.883	2														0	0	163.74	77.37
P38116	ADP-ribosylation factor-like protein 1	ILILGLDGAGK	0	16	Dimethyl:2H(6)13C(2)@N-term; Dimethyl:2H(6)13C(2)(K)@11		-0.00436066	1140.8	571.408	1140.81	571.41	2														60.44	51.04	1674.65	271.29
P38116	ADP-ribosylation factor-like protein 1	ILILGLDGAGK	2	99	Dimethyl@N-term; Dimethyl(K)@11		-0.00471098	1124.71	563.363	1124.72	563.366	2														45.99	41.61	1281.9	238.19
P00560	Phosphoglycerate kinase	ELPGVAFLSEK	0	99	Dimethyl:2H(6)13C(2)@N-term; Dimethyl:2H(6)13C(2)(K)@11		1.00203	1261.79	631.904	1260.79	631.402	2														109.54	68.56	38040.3	1272.3
P00560	Phosphoglycerate kinase	ASAPGSVILLENLR	0	99	Dimethyl:2H(4)@N-term		0.992945	1471.86	736.939	1470.87	736.443	2														291.01	110.58	762.22	174.28
P00560	Phosphoglycerate kinase	ASAPGSVILLENLR	0	99	Dimethyl:2H(4)@N-term		0.992945	1471.86	736.939	1470.87	736.443	2														291.01	110.76	762.22	174.28
P00560	Phosphoglycerate kinase	ISHVSTGGGASLELLEGK	0	99	Dimethyl@N-term; Dimethyl(K)@18		1.0052	1810.99	604.67	1809.98	604.335	3														0	0	6329.17	559.61
P00560	Phosphoglycerate kinase	TVTDKEGIPAGWQGLDNGPESR	0	80	Dimethyl@N-term; Dimethyl(K)@5	missed K-E@5	1.00054	2383.18	596.803	2382.18	596.553	4														0	0	0	0
P00560	Phosphoglycerate kinase	GVEVVLPVDFIIADAFSADANTK	0	66	Dimethyl:2H(6)13C(2)@N-term; Oxidation(P)@7; Deamidated(N)@21; Dimethyl:2H(6)13C(2)(K)@23		0.0489858	2479.42	827.479	2479.37	827.463	3														3.08	18.16	331.07	68.06
P00560	Phosphoglycerate kinase	VDFNVPLDGK	0	97	Dimethyl:2H(6)13C(2)@N-term; Deamidated(N)@4; Dimethyl:2H(6)13C(2)(K)@10		0.0192395	1175.72	588.867	1175.7	588.858	2														788.21	205.86	35910.8	1348.95
P00560	Phosphoglycerate kinase	LSVQDLDLK	0	99	Dimethyl:2H(6)13C(2)@N-term; Deamidated(Q)@4; Dimethyl:2H(6)13C(2)(K)@9		0.0170738	1102.72	552.369	1102.71	552.36	2														204.82	105.59	56712.8	1754.79
P00560	Phosphoglycerate kinase	TIVWNGPPGVFEFEK	0	70	No Dimethyl@N-term; Dimethyl(K)@15		0.021303	1746.92	874.467	1746.9	874.456	2														144.89	78.95	538.31	139.49
P00560	Phosphoglycerate kinase	SSAAGNTVIIGGGDTATVAK	0	99	Dimethyl@N-term; Deamidated(N)@6; Dimethyl(K)@20		0.0216889	1845.99	616.337	1845.97	616.33	3														137.25	104.01	8904.72	836.11
P00560	Phosphoglycerate kinase	AHSSMVGFDLPQR	0	95	Dimethyl@N-term; Deamidated(Q)@12		0.0160956	1472.72	491.915	1472.71	491.91	3														244.37	105.96	9303.8	653.71
P00560	Phosphoglycerate kinase	DVTFLNDCVGPEVEAAVK	0	84	Dimethyl:2H(6)13C(2)@N-term; Deamidated(N)@6; Carbamidomethyl(C)@8; Dimethyl:2H(6)13C(2)(K)@18		0.0216622	2035.1	679.373	2035.08	679.366	3														56.44	37.3	258.01	98.88
P00560	Phosphoglycerate kinase	VLENTEIGDSIFDK	0	99	Dimethyl@N-term; Deamidated(N)@4; Dimethyl(K)@14		0.016433	1635.84	546.288	1635.82	546.282	3														80.97	67.67	10925.4	778.88
P00560	Phosphoglycerate kinase	SSAAGNTVIIGGGDTATVAK	0	99	Dimethyl:2H(6)13C(2)@N-term; Deamidated(N)@6; Dimethyl:2H(6)13C(2)(K)@20		0.0163257	1862.07	932.044	1862.06	932.036	2														0	0	269.59	139.88
P00560	Phosphoglycerate kinase	SSAAGNTVIIGGGDTATVAK	0	99	Dimethyl@N-term; Deamidated(N)@6; Dimethyl(K)@20		0.0124653	1845.98	923.998	1845.97	923.991	2														0	0	388.41	167.84
P00560	Phosphoglycerate kinase	SSAAGNTVIIGGGDTATVAK	0	99	Dimethyl@N-term; Deamidated(N)@6; Dimethyl(K)@20		0.00978691	1845.98	616.333	1845.97	616.33	3														57.27	59.61	892.15	310.1
P00560	Phosphoglycerate kinase	TIVWNGPPGVFEFEK	0	99	Dimethyl@N-term; Deamidated(N)@5; Dimethyl(K)@15		0.0088722	1775.92	888.968	1775.91	888.964	2														87.88	57.4	16638.5	801.63
P00560	Phosphoglycerate kinase	YVVLASHLGRPNGER	0	48	Dimethyl@N-term; Deamidated(N)@12		0.00783682	1695.91	424.986	1695.91	424.984	4														0	0	237	147.86
P00560	Phosphoglycerate kinase	DVTFLNDCVGPEVEAAVK	0	99	Dimethyl@N-term; Deamidated(N)@6; Carbamidomethyl(C)@8; Dimethyl(K)@18		0.00920269	2019	1010.5	2018.99	1010.5	2														15.96	27.6	227.13	91.96
P00560	Phosphoglycerate kinase	ELQSLLGK	0	27	Dimethyl@N-term; Dimethyl(K)@8		0.00427607	942.579	472.297	942.575	472.295	2														310.75	155.25	174.23	185.19
P00560	Phosphoglycerate kinase	TIVWNGPPGVFEFEK	0	47	No Dimethyl@N-term; Deamidated(N)@5; Dimethyl:2H(6)13C(2)(K)@15		0.00774966	1755.93	878.974	1755.93	878.971	2														81.33	57.84	559.95	142.18
P00560	Phosphoglycerate kinase	HELSSLADVYINDAFGTAHR	0	99	Dimethyl@N-term; Deamidated(N)@12		0.00877536	2244.09	562.03	2244.08	562.028	4														119.52	78.31	510.32	162.6
P00560	Phosphoglycerate kinase	YVVLASHLGRPNGER	0	53	Dimethyl@N-term; Deamidated(N)@12		0.00661611	1695.91	424.985	1695.91	424.984	4														183.56	85.41	527.77	144.74
P00560	Phosphoglycerate kinase	AHSSMVGFDLPQR	0	99	No Dimethyl@N-term		0.00485376	1443.7	722.856	1443.69	722.854	2
P00560	Phosphoglycerate kinase	SSAAGNTVIIGGGDTATVAK	0	99	Dimethyl:2H(6)13C(2)@N-term; Dimethyl:2H(6)13C(2)(K)@20		0.00594456	1861.08	931.547	1861.07	931.544	2														0	0	640.47	195.72
P00560	Phosphoglycerate kinase	SSAAGNTVIIGGGDTATVAK	0	93	Dimethyl:2H(6)13C(2)@N-term; Dimethyl:2H(6)13C(2)(K)@20		0.00594456	1861.08	931.547	1861.07	931.544	2														0	0	640.47	195.88
P00560	Phosphoglycerate kinase	HELSSLADVYINDAFGTAHR	0	99	Dimethyl:2H(4)@N-term		0.00716528	2247.13	750.05	2247.12	750.048	3														1426.58	244.65	6749.81	520.18
P00560	Phosphoglycerate kinase	LSVQDLDLKDK	1	90	Dimethyl@N-term; Dimethyl(K)@9; Dimethyl(K)@11	missed K-D@9	0.00376801	1356.79	453.271	1356.79	453.269	3														13.42	23.73	534.93	150.46
P00560	Phosphoglycerate kinase	LSVQDLDLKDK	0	68	Dimethyl@N-term; Dimethyl(K)@9; Dimethyl(K)@11	missed K-D@9	0.00376801	1356.79	453.271	1356.79	453.269	3														13.42	23.73	534.93	150.47
P00560	Phosphoglycerate kinase	EGIPAGWQGLDNGPESR	0	99	Dimethyl:2H(6)13C(2)@N-term; Deamidated(N)@12		0.00500885	1818.9	910.456	1818.89	910.454	2														971.1	224.9	1068.29	222.96
P00560	Phosphoglycerate kinase	EGIPAGWQGLDNGPESR	0	88	Dimethyl:2H(6)13C(2)@N-term; Deamidated(N)@12		0.00500885	1818.9	910.456	1818.89	910.454	2														971.1	224.68	1068.29	222.99
P00560	Phosphoglycerate kinase	YVVLASHLGRPNGER	2	99	Dimethyl@N-term; Deamidated(N)@12		0.00466297	1695.91	424.985	1695.91	424.984	4														408.17	138.26	1718.11	261.74
P00560	Phosphoglycerate kinase	SSAAGNTVIIGGGDTATVAK	0	99	Dimethyl@N-term; Dimethyl(K)@20		0.00501385	1844.99	923.502	1844.98	923.499	2														0	0	5883.75	690.34
P00560	Phosphoglycerate kinase	KVLENTEIGDSIFDK	2	99	Dimethyl:2H(6)13C(2)@N-term; Dimethyl:2H(6)13C(2)(K)@1; Dimethyl:2H(6)13C(2)(K)@15	missed K-V@1	0.00481938	1815.1	606.042	1815.1	606.041	3														0	0	2997.69	389.82
P00560	Phosphoglycerate kinase	KVLENTEIGDSIFDK	0	99	Dimethyl:2H(6)13C(2)@N-term; Dimethyl:2H(6)13C(2)(K)@1; Dimethyl:2H(6)13C(2)(K)@15	missed K-V@1	0.00481938	1815.1	606.042	1815.1	606.041	3														0	0	2997.69	389.82
P00560	Phosphoglycerate kinase	ISHVSTGGGASLELLEGK	2	99	Dimethyl@N-term; Dimethyl(K)@18		0.00470224	1809.99	604.337	1809.98	604.335	3														0	0	6753.4	578
P00560	Phosphoglycerate kinase	ISHVSTGGGASLELLEGK	0	99	Dimethyl@N-term; Dimethyl(K)@18		0.00470224	1809.99	604.337	1809.98	604.335	3														0	0	6329.17	559.93
P00560	Phosphoglycerate kinase	TIVWNGPPGVFEFEK	0	99	Dimethyl@N-term; Deamidated(N)@5; Dimethyl(K)@15		0.00447764	1775.92	888.966	1775.91	888.964	2														118.19	53.81	1164.35	177.56
P00560	Phosphoglycerate kinase	HELSSLADVYINDAFGTAHR	0	99	Dimethyl:2H(6)13C(2)@N-term		0.00557178	2251.15	563.794	2251.14	563.793	4														405.92	130.81	2591.09	321.63
P00560	Phosphoglycerate kinase	ASAPGSVILLENLR	0	99	Dimethyl@N-term		0.00351029	1466.85	489.957	1466.85	489.956	3														118.58	69.74	4917.68	428.41
P00560	Phosphoglycerate kinase	ASAPGSVILLENLR	0	99	Dimethyl@N-term		0.00351029	1466.85	489.957	1466.85	489.956	3														118.58	69.74	4917.68	428.41
P00560	Phosphoglycerate kinase	AHSSMVGFDLPQR	0	99	Delta:H(2)C(2)@N-term		0.00342208	1469.71	490.911	1469.71	490.91	3
P00560	Phosphoglycerate kinase	GVEVVLPVDFIIADAFSADANTK	2	99	Dimethyl@N-term; Dimethyl(K)@23		0.0056921	2446.31	816.442	2446.3	816.44	3														10.63	11.58	1208.38	130.03
P00560	Phosphoglycerate kinase	HELSSLADVYINDAFGTAHR	2	99	Dimethyl@N-term		0.00465642	2243.1	748.708	2243.1	748.706	3														1426.58	244.63	6749.81	520.29
P00560	Phosphoglycerate kinase	HELSSLADVYINDAFGTAHR	0	99	Dimethyl@N-term		0.00465642	2243.1	748.708	2243.1	748.706	3														1426.58	244.65	6749.81	520.18
P00560	Phosphoglycerate kinase	DVTFLNDCVGPEVEAAVK	0	99	Dimethyl@N-term; Carbamidomethyl(C)@8; Dimethyl(K)@18		0.00415315	2018.01	673.676	2018	673.675	3														0	0	996.26	205.63
P00560	Phosphoglycerate kinase	DVTFLNDCVGPEVEAAVK	0	83	Dimethyl@N-term; Carbamidomethyl(C)@8; Dimethyl(K)@18		0.00415315	2018.01	673.676	2018	673.675	3														0	0	996.26	205.58
P00560	Phosphoglycerate kinase	TVTDKEGIPAGWQGLDNGPESR	0	99	Dimethyl@N-term; Dimethyl(K)@5; Deamidated(N)@17	missed K-E@5	0.00489021	2383.17	795.397	2383.17	795.396	3														0	0	1251.07	273.03
P00560	Phosphoglycerate kinase	TVTDKEGIPAGWQGLDNGPESR	0	99	Dimethyl@N-term; Dimethyl(K)@5; Deamidated(N)@17	missed K-E@5	0.00489021	2383.17	795.397	2383.17	795.396	3														0	0	1251.07	273.14
P00560	Phosphoglycerate kinase	TIVWNGPPGVFEFEK	0	99	Dimethyl@N-term; Deamidated(N)@5; Dimethyl(K)@15		0.00357127	1775.92	592.98	1775.91	592.978	3														0	0	482.01	127.97
P00560	Phosphoglycerate kinase	HELSSLADVYINDAFGTAHR	0	89	Dimethyl:2H(6)13C(2)@N-term; Deamidated(N)@12		0.00449027	2252.13	564.04	2252.13	564.039	4														112.37	75.98	585.12	173.86
P00560	Phosphoglycerate kinase	VLENTEIGDSIFDK	0	99	Dimethyl:2H(6)13C(2)@N-term; Dimethyl:2H(6)13C(2)(K)@14		0.00319098	1650.93	826.473	1650.93	826.472	2														205.65	116.87	45686.3	1588.72
P00560	Phosphoglycerate kinase	VLENTEIGDSIFDK	0	99	Dimethyl:2H(6)13C(2)@N-term; Dimethyl:2H(6)13C(2)(K)@14		0.00319098	1650.93	826.473	1650.93	826.472	2														204.59	106.97	45686.3	1588.72
P00560	Phosphoglycerate kinase	TVTDKEGIPAGWQGLDNGPESR	0	99	Dimethyl:2H(6)13C(2)@N-term; Dimethyl:2H(6)13C(2)(K)@5	missed K-E@5	0.00463443	2398.28	800.432	2398.27	800.431	3														62.9	55.84	4116.91	487.12
P00560	Phosphoglycerate kinase	TVTDKEGIPAGWQGLDNGPESR	0	98	Dimethyl:2H(6)13C(2)@N-term; Dimethyl:2H(6)13C(2)(K)@5	missed K-E@5	0.00463443	2398.28	800.432	2398.27	800.431	3														62.9	55.84	4116.91	487.15
P00560	Phosphoglycerate kinase	ALENPTRPFLAILGGAK	2	99	Dimethyl@N-term; Dimethyl(K)@17		0.00351818	1823.07	608.697	1823.07	608.696	3														0	0	5226.28	451.59
P00560	Phosphoglycerate kinase	ALENPTRPFLAILGGAK	0	99	Dimethyl@N-term; Dimethyl(K)@17		0.00351818	1823.07	608.697	1823.07	608.696	3														0	0	5226.28	451.58
P00560	Phosphoglycerate kinase	ISHVSTGGGASLELLEGK	0	84	Dimethyl:2H(6)13C(2)@N-term; Dimethyl:2H(6)13C(2)(K)@18		0.00352177	1826.08	609.699	1826.07	609.698	3														0	0	3981.77	546.5
P00560	Phosphoglycerate kinase	TVTDKEGIPAGWQGLDNGPESR	0	99	Dimethyl@N-term; Dimethyl(K)@5; Deamidated(N)@17	missed K-E@5	0.004524	2383.17	795.397	2383.17	795.396	3														0	0	3697.07	415.92
P00560	Phosphoglycerate kinase	TVTDKEGIPAGWQGLDNGPESR	0	41	Dimethyl@N-term; Dimethyl(K)@5; Deamidated(N)@17	missed K-E@5	0.004524	2383.17	795.397	2383.17	795.396	3														0	0	3697.07	416.19
P00560	Phosphoglycerate kinase	HELSSLADVYINDAFGTAHR	0	99	Dimethyl@N-term; Deamidated(N)@12		0.00417398	2244.09	749.036	2244.08	749.034	3														443.19	149.77	1596.35	287.73
P00560	Phosphoglycerate kinase	HELSSLADVYINDAFGTAHR	0	80	Dimethyl@N-term; Deamidated(N)@12		0.00417398	2244.09	749.036	2244.08	749.034	3														443.19	149.77	1596.35	287.76
P00560	Phosphoglycerate kinase	ISHVSTGGGASLELLEGK	0	99	Dimethyl:2H(6)13C(2)@N-term; Dimethyl:2H(6)13C(2)(K)@18		0.00333867	1826.08	609.699	1826.07	609.698	3														0	0	6509.77	567.29
P00560	Phosphoglycerate kinase	ISHVSTGGGASLELLEGK	0	99	Dimethyl:2H(6)13C(2)@N-term; Dimethyl:2H(6)13C(2)(K)@18		0.00333867	1826.08	609.699	1826.07	609.698	3														0	0	6509.77	567.28
P00560	Phosphoglycerate kinase	TVTDKEGIPAGWQGLDNGPESR	2	99	Dimethyl@N-term; Dimethyl(K)@5	missed K-E@5	0.00434125	2382.19	795.069	2382.18	795.068	3														62.9	55.84	4116.91	487.12
P00560	Phosphoglycerate kinase	VDFNVPLDGKK	0	99	Dimethyl@N-term; Dimethyl(K)@10; Dimethyl(K)@11	missed K-K@10	0.00218938	1314.76	439.26	1314.75	439.259	3														0	0	8971.37	1051.83
P00560	Phosphoglycerate kinase	VDFNVPLDGKK	0	99	Dimethyl@N-term; Dimethyl(K)@10; Dimethyl(K)@11	missed K-K@10	0.00218938	1314.76	439.26	1314.75	439.259	3														0	0	8971.37	1051.86
P00560	Phosphoglycerate kinase	IVAALPTIK	0	99	Dimethyl@N-term; Dimethyl(K)@9		0.00156557	980.665	491.34	980.663	491.339	2														33.86	42.9	25886.8	1393.49
P00560	Phosphoglycerate kinase	IVAALPTIK	0	99	Dimethyl@N-term; Dimethyl(K)@9		0.00156557	980.665	491.34	980.663	491.339	2														33.86	42.87	25886.8	1393.49
P00560	Phosphoglycerate kinase	IVAALPTIK	0	95	Dimethyl@N-term; Dimethyl(K)@9		0.00156557	980.665	491.34	980.663	491.339	2														38.01	45.15	25886.8	1393.49
P00560	Phosphoglycerate kinase	ISHVSTGGGASLELLEGK	0	96	Dimethyl@N-term; Dimethyl(K)@18		0.00287117	1809.99	604.336	1809.98	604.335	3														0	0	0	0
P00560	Phosphoglycerate kinase	SSAAGNTVIIGGGDTATVAK	0	99	No Dimethyl@N-term; Dimethyl(K)@20		0.00277493	1816.96	909.485	1816.95	909.484	2														0	0	1404.29	265
P00560	Phosphoglycerate kinase	GVEVVLPVDFIIADAFSADANTK	0	99	Dimethyl:2H(6)13C(2)@N-term; Dimethyl:2H(6)13C(2)(K)@23		0.00358963	2462.39	821.805	2462.39	821.803	3														10.63	11.58	1208.38	130.03
P00560	Phosphoglycerate kinase	EGIPAGWQGLDNGPESR	0	99	Dimethyl:2H(6)13C(2)@N-term; Deamidated(N)@12		0.00252512	1818.9	910.455	1818.89	910.454	2														112.69	74.22	3285.19	400.06
P00560	Phosphoglycerate kinase	HELSSLADVYINDAFGTAHR	0	99	Dimethyl:2H(6)13C(2)@N-term		0.00306671	2251.14	751.389	2251.14	751.388	3														1333.64	236.74	7827.72	559.05
P00560	Phosphoglycerate kinase	HELSSLADVYINDAFGTAHR	0	99	Dimethyl:2H(6)13C(2)@N-term		0.00306671	2251.14	751.389	2251.14	751.388	3														1333.64	236.74	7827.72	559.08
P00560	Phosphoglycerate kinase	VLENTEIGDSIFDK	0	99	Dimethyl@N-term; Dimethyl(K)@14		0.002226	1634.84	818.428	1634.84	818.427	2														298.58	128.74	36372.7	1420.88
P00560	Phosphoglycerate kinase	VLENTEIGDSIFDK	0	99	Dimethyl@N-term; Dimethyl(K)@14		0.002226	1634.84	818.428	1634.84	818.427	2														298.58	128.6	36372.7	1420.9
P00560	Phosphoglycerate kinase	VLENTEIGDSIFDK	0	15	Dimethyl@N-term; Dimethyl(K)@14		0.002226	1634.84	818.428	1634.84	818.427	2														298.58	128.68	36372.7	1420.83
P00560	Phosphoglycerate kinase	ALENPTRPFLAILGGAK	0	85	Delta:H(2)C(2)@N-term; Dimethyl(K)@17		0.00224902	1821.05	608.025	1821.05	608.024	3														60.38	38.88	1082.34	164.58
P00560	Phosphoglycerate kinase	ALENPTRPF	0	82	Dimethyl@N-term	cleaved F-L@C-term	0.00131882	1071.57	536.794	1071.57	536.793	2														135.22	119.68	5062.45	550.47
P00560	Phosphoglycerate kinase	YVLEHHPR	0	99	Dimethyl:2H(6)13C(2)@N-term		0.00109792	1085.62	362.88	1085.62	362.879	3														132.8	23.48	990.5	63.14
P00560	Phosphoglycerate kinase	ALENPTRPFLAILGGAK	0	99	Dimethyl:2H(6)13C(2)@N-term; Dimethyl:2H(6)13C(2)(K)@17		0.00179167	1839.16	614.06	1839.16	614.059	3														0	0	5226.28	451.58
P00560	Phosphoglycerate kinase	YVLEHHPR	2	99	Dimethyl@N-term		0.000950234	1077.57	360.198	1077.57	360.198	3														145.35	24.28	944.54	61.65
P00560	Phosphoglycerate kinase	YVLEHHPR	0	75	Dimethyl@N-term		0.000950234	1077.57	360.198	1077.57	360.198	3														145.35	24.28	944.54	61.65
P00560	Phosphoglycerate kinase	ISHVSTGGGASLELLEGK	0	99	Dimethyl@N-term; Dimethyl(K)@18		0.00151966	1809.99	906	1809.98	905.999	2														0	0	1047.17	227.6
P00560	Phosphoglycerate kinase	ASAPGSVILLENLR	0	99	Dimethyl:2H(6)13C(2)@N-term		0.00121155	1474.89	738.453	1474.89	738.452	2														1288.34	219.38	22816.4	922.87
P00560	Phosphoglycerate kinase	ASAPGSVILLENLR	0	99	Dimethyl:2H(6)13C(2)@N-term		0.00121155	1474.89	738.453	1474.89	738.452	2														1288.34	219.44	22816.4	922.87
P00560	Phosphoglycerate kinase	ASAPGSVILLENLR	0	99	Dimethyl:2H(6)13C(2)@N-term		0.00121155	1474.89	738.453	1474.89	738.452	2														1288.34	219.51	22816.4	922.87
P00560	Phosphoglycerate kinase	ASAPGSVILLENLR	0	99	Dimethyl:2H(6)13C(2)@N-term		0.00121155	1474.89	738.453	1474.89	738.452	2														1288.34	219.44	22816.4	922.86
P00560	Phosphoglycerate kinase	KVLENTEIGDSIFDK	0	99	Dimethyl:2H(6)13C(2)@N-term; Dimethyl:2H(6)13C(2)(K)@1; Dimethyl:2H(6)13C(2)(K)@15	missed K-V@1	0.00145771	1815.1	908.558	1815.1	908.557	2														0	0	1210.26	247.64
P00560	Phosphoglycerate kinase	IVAALPTIK	0	99	Dimethyl:2H(6)13C(2)@N-term; Dimethyl:2H(6)13C(2)(K)@9		0.000743953	996.753	499.384	996.752	499.383	2														33.49	42.39	27631.9	1439.05
P00560	Phosphoglycerate kinase	IVAALPTIK	0	99	Dimethyl:2H(6)13C(2)@N-term; Dimethyl:2H(6)13C(2)(K)@9		0.000743953	996.753	499.384	996.752	499.383	2														33.49	42.68	27631.9	1439.08
P00560	Phosphoglycerate kinase	IVAALPTIK	0	97	Dimethyl:2H(6)13C(2)@N-term; Dimethyl:2H(6)13C(2)(K)@9		0.000743953	996.753	499.384	996.752	499.383	2														26.31	36.95	27631.9	1439.05
P00560	Phosphoglycerate kinase	IVAALPTIK	0	28	Dimethyl:2H(6)13C(2)@N-term; Dimethyl:2H(6)13C(2)(K)@9		0.000743953	996.753	499.384	996.752	499.383	2														33.49	42.68	27631.9	1439.08
P00560	Phosphoglycerate kinase	SSAAGNTVIIGGGDTATVAK	0	99	Dimethyl@N-term; Dimethyl(K)@20		0.0013605	1844.99	616.003	1844.98	616.002	3														0	0	983.29	239.57
P00560	Phosphoglycerate kinase	YVVLASHLGRPNGER	0	82	Dimethyl@N-term; Deamidated(N)@12		0.00123946	1695.91	566.31	1695.91	566.309	3														123.65	70.38	719.04	169.66
P00560	Phosphoglycerate kinase	IVAALPTIK	2	99	Delta:H(2)C(2)@N-term; Dimethyl(K)@9		0.000706372	978.648	490.332	978.648	490.331	2														0	0	0	0
P00560	Phosphoglycerate kinase	ALLDEVVK	0	99	Dimethyl@N-term; Dimethyl(K)@8		0.000671196	941.58	471.798	941.58	471.797	2														948.74	241.36	41988.3	1604.62
P00560	Phosphoglycerate kinase	ALLDEVVK	0	99	Dimethyl@N-term; Dimethyl(K)@8		0.000671196	941.58	471.798	941.58	471.797	2														948.74	241.35	41988.3	1604.66
P00560	Phosphoglycerate kinase	TIVWNGPPGVFEFEK	0	95	Dimethyl@N-term; Dehydrated(T)@1; Trp->Kynurenin(W)@4; Dimethyl(K)@15		0.00123244	1760.92	881.465	1760.91	881.464	2														201.04	91.59	0	0
P00560	Phosphoglycerate kinase	LSVQDLDLK	2	99	Dimethyl@N-term; Dimethyl(K)@9		0.000743837	1085.63	543.824	1085.63	543.824	2														273.56	116.42	47221.3	1604.24
P00560	Phosphoglycerate kinase	LSVQDLDLK	0	99	Dimethyl@N-term; Dimethyl(K)@9		0.000743837	1085.63	543.824	1085.63	543.824	2														0	0	47221.3	1604.19
P00560	Phosphoglycerate kinase	LSVQDLDLK	0	99	Dimethyl@N-term; Dimethyl(K)@9		0.000743837	1085.63	543.824	1085.63	543.824	2														0	0	47221.3	1604.19
P00560	Phosphoglycerate kinase	ASAPGSVILLENLR	2	99	Dimethyl@N-term		0.000970517	1466.85	734.431	1466.85	734.43	2														1288.34	219.51	22816.4	922.87
P00560	Phosphoglycerate kinase	ASAPGSVILLENLR	0	72	Dimethyl@N-term		0.000970517	1466.85	734.431	1466.85	734.43	2														1288.34	219.44	22816.4	922.86
P00560	Phosphoglycerate kinase	ELPGVAFLSEK	0	99	Dimethyl:2H(6)13C(2)@N-term; Dimethyl:2H(6)13C(2)(K)@11		0.00068201	1260.79	631.403	1260.79	631.402	2														109.54	68.71	38040.3	1272.23
P00560	Phosphoglycerate kinase	ELPGVAFLSEK	0	99	Dimethyl:2H(6)13C(2)@N-term; Dimethyl:2H(6)13C(2)(K)@11		0.00068201	1260.79	631.403	1260.79	631.402	2														109.54	68.65	38040.3	1272.3
P00560	Phosphoglycerate kinase	ELPGVAFLSEK	0	99	Dimethyl:2H(6)13C(2)@N-term; Dimethyl:2H(6)13C(2)(K)@11		0.00068201	1260.79	631.403	1260.79	631.402	2														109.54	68.56	38040.3	1272.94
P00560	Phosphoglycerate kinase	ELPGVAFLSEK	0	99	Dimethyl:2H(6)13C(2)@N-term; Dimethyl:2H(6)13C(2)(K)@11		0.00068201	1260.79	631.403	1260.79	631.402	2														109.54	68.56	38040.3	1272.25
P00560	Phosphoglycerate kinase	ELPGVAFLSEK	0	93	Dimethyl:2H(6)13C(2)@N-term; Dimethyl:2H(6)13C(2)(K)@11		0.00068201	1260.79	631.403	1260.79	631.402	2														109.54	68.56	38040.3	1272.42
P00560	Phosphoglycerate kinase	ELPGVAFLSEK	0	66	Dimethyl:2H(6)13C(2)@N-term; Dimethyl:2H(6)13C(2)(K)@11		0.00068201	1260.79	631.403	1260.79	631.402	2														109.54	68.71	38040.3	1272.23
P00560	Phosphoglycerate kinase	SSAAGNTVIIGGGDTATVAK	0	99	Dimethyl@N-term; Dimethyl(K)@20		0.000994285	1844.99	616.002	1844.98	616.002	3														0	0	8904.72	836.27
P00560	Phosphoglycerate kinase	DVTFLNDCVGPEVEAAVK	0	99	Dimethyl@N-term; Carbamidomethyl(C)@8; Dimethyl(K)@18		0.00102373	2018	1010.01	2018	1010.01	2														101.03	72.39	2086.71	297.73
P00560	Phosphoglycerate kinase	ASAPGSVILLENLR	0	99	No Dimethyl@N-term		0.000705832	1438.82	720.415	1438.81	720.414	2
P00560	Phosphoglycerate kinase	EGIPAGWQGLDNGPESR	0	99	Dimethyl@N-term; Deamidated(N)@12		0.000820235	1810.85	906.432	1810.85	906.432	2														112.69	74.21	3285.19	400.06
P00560	Phosphoglycerate kinase	SSAAGNTVIIGGGDTATVAK	2	99	Dimethyl@N-term; Dimethyl(K)@20		0.000811177	1844.99	616.002	1844.98	616.002	3														180.06	120.8	9848.65	893.01
P00560	Phosphoglycerate kinase	DVTFLNDCVGPEVEAAVK	0	99	Dimethyl@N-term; Carbamidomethyl(C)@8; Dimethyl(K)@18		0.000779588	2018	1010.01	2018	1010.01	2														48.76	46.55	2086.71	297.97
P00560	Phosphoglycerate kinase	DVTFLNDCVGPEVEAAVK	0	99	Dimethyl@N-term; Carbamidomethyl(C)@8; Dimethyl(K)@18		0.000779588	2018	1010.01	2018	1010.01	2														48.76	46.71	2086.71	297.8
P00560	Phosphoglycerate kinase	ELPGVAFLSEK	0	99	Dimethyl@N-term; Dimethyl(K)@11		0.000449874	1244.7	623.358	1244.7	623.358	2														97.56	64.86	35779.2	1234.83
P00560	Phosphoglycerate kinase	ELPGVAFLSEK	0	99	Dimethyl@N-term; Dimethyl(K)@11		0.000449874	1244.7	623.358	1244.7	623.358	2														93.13	63.39	35779.2	1234.95
P00560	Phosphoglycerate kinase	ELPGVAFLSEK	0	99	Dimethyl@N-term; Dimethyl(K)@11		0.000449874	1244.7	623.358	1244.7	623.358	2														93.13	63.39	35779.2	1234.79
P00560	Phosphoglycerate kinase	SSAAGNTVIIGGGDTATVAK	0	99	Dimethyl:2H(6)13C(2)@N-term; Dimethyl:2H(6)13C(2)(K)@20		0.000617862	1861.07	621.365	1861.07	621.365	3														0	0	8904.72	836.11
P00560	Phosphoglycerate kinase	SSAAGNTVIIGGGDTATVAK	0	99	Dimethyl:2H(6)13C(2)@N-term; Dimethyl:2H(6)13C(2)(K)@20		0.000617862	1861.07	621.365	1861.07	621.365	3														0	0	8904.72	836.17
P00560	Phosphoglycerate kinase	SSAAGNTVIIGGGDTATVAK	0	99	Dimethyl:2H(6)13C(2)@N-term; Dimethyl:2H(6)13C(2)(K)@20		0.000617862	1861.07	621.365	1861.07	621.365	3														0	0	8904.72	836.27
P00560	Phosphoglycerate kinase	ISHVSTGGGASLELLEGK	0	99	Dimethyl:2H(6)13C(2)@N-term; Dimethyl:2H(6)13C(2)(K)@18		0.000534918	1826.07	914.044	1826.07	914.043	2														0	0	1097.93	233.08
P00560	Phosphoglycerate kinase	KVLENTEIGDSIFDK	0	99	Dimethyl@N-term; Dimethyl(K)@1; Dimethyl(K)@15	missed K-V@1	0.00045643	1790.97	597.996	1790.97	597.996	3														0	0	2588.66	362.83
P00560	Phosphoglycerate kinase	AAGFLLEK	0	99	Dimethyl@N-term; Dimethyl(K)@8		0.000121605	903.543	452.779	903.543	452.779	2														64.06	53.91	26856.2	1403.33
P00560	Phosphoglycerate kinase	AAGFLLEK	0	99	Dimethyl@N-term; Dimethyl(K)@8		0.000121605	903.543	452.779	903.543	452.779	2														70.07	56.33	26856.2	1403.18
P00560	Phosphoglycerate kinase	AAGFLLEK	0	99	Dimethyl@N-term; Dimethyl(K)@8		0.000121605	903.543	452.779	903.543	452.779	2														69.8	56.23	26856.2	1403.18
P00560	Phosphoglycerate kinase	AAGFLLEK	0	84	Dimethyl@N-term; Dimethyl(K)@8		0.000121605	903.543	452.779	903.543	452.779	2														64.06	53.98	27814.7	1427.96
P00560	Phosphoglycerate kinase	AHSSMVGFDLPQR	0	99	Dimethyl:2H(6)13C(2)@N-term		0.000149391	1479.77	494.264	1479.77	494.263	3														856.05	198.29	9303.8	653.73
P00560	Phosphoglycerate kinase	AHSSMVGFDLPQR	0	99	Dimethyl:2H(6)13C(2)@N-term		0.000149391	1479.77	494.264	1479.77	494.263	3														856.05	198.31	9303.8	653.72
P00560	Phosphoglycerate kinase	AHSSMVGFDLPQR	0	92	Dimethyl:2H(6)13C(2)@N-term		0.000149391	1479.77	494.264	1479.77	494.263	3														856.05	198.29	9303.8	653.73
P00560	Phosphoglycerate kinase	EGIPAGWQGLDNGPESR	0	99	Dimethyl@N-term		0.000157797	1809.86	604.295	1809.86	604.295	3														192.43	103.03	2277.09	339.94
P00560	Phosphoglycerate kinase	VDFNVPLDGKK	0	99	Dimethyl@N-term; Dimethyl(K)@10; Dimethyl(K)@11	missed K-K@10	9.64e-05	1314.75	439.259	1314.75	439.259	3														0	0	1560.54	278.76
P00560	Phosphoglycerate kinase	VDFNVPLDGKK	0	98	Dimethyl@N-term; Dimethyl(K)@10; Dimethyl(K)@11	missed K-K@10	9.64e-05	1314.75	439.259	1314.75	439.259	3														0	0	1560.54	278.76
P00560	Phosphoglycerate kinase	VDFNVPLDGKK	2	99	Dimethyl:2H(6)13C(2)@N-term; Dimethyl:2H(6)13C(2)(K)@10; Dimethyl:2H(6)13C(2)(K)@11	missed K-K@10	3.49e-05	1338.89	447.303	1338.89	447.303	3														0	0	11483.1	1188.64
P00560	Phosphoglycerate kinase	VDFNVPLDGKK	0	99	Dimethyl:2H(6)13C(2)@N-term; Dimethyl:2H(6)13C(2)(K)@10; Dimethyl:2H(6)13C(2)(K)@11	missed K-K@10	3.49e-05	1338.89	447.303	1338.89	447.303	3														0	0	11483.1	1188.71
P00560	Phosphoglycerate kinase	VDFNVPLDGKK	0	75	Dimethyl:2H(6)13C(2)@N-term; Dimethyl:2H(6)13C(2)(K)@10; Dimethyl:2H(6)13C(2)(K)@11	missed K-K@10	3.49e-05	1338.89	447.303	1338.89	447.303	3														0	0	11483.1	1188.64
P00560	Phosphoglycerate kinase	TIVWNGPPGVFEFEK	0	99	Dimethyl@N-term; Dimethyl(K)@15		-3.9e-05	1774.93	888.472	1774.93	888.472	2														105.71	62.68	15414.9	772.4
P00560	Phosphoglycerate kinase	TIVWNGPPGVFEFEK	0	99	Dimethyl@N-term; Dimethyl(K)@15		-3.9e-05	1774.93	888.472	1774.93	888.472	2														105.71	62.78	15414.9	772.46
P00560	Phosphoglycerate kinase	ASAPGSVILLENL	0	95	Dimethyl@N-term	cleaved L-R@C-term	-4.04e-05	1310.74	656.38	1310.74	656.38	2														0	0	463.26	105.62
P00560	Phosphoglycerate kinase	ALLDEVVK	0	99	Dimethyl:2H(6)13C(2)@N-term; Dimethyl:2H(6)13C(2)(K)@8		-2.99e-05	957.668	479.841	957.668	479.842	2														2122.88	356.75	52294	1787.18
P00560	Phosphoglycerate kinase	ALLDEVVK	0	99	Dimethyl:2H(6)13C(2)@N-term; Dimethyl:2H(6)13C(2)(K)@8		-2.99e-05	957.668	479.841	957.668	479.842	2														2122.88	356.76	52294	1787.15
P00560	Phosphoglycerate kinase	ALLDEVVK	0	99	Dimethyl:2H(6)13C(2)@N-term; Dimethyl:2H(6)13C(2)(K)@8		-2.99e-05	957.668	479.841	957.668	479.842	2														2122.88	356.76	52294	1787.15
P00560	Phosphoglycerate kinase	AGAEIVPK	2	99	Dimethyl@N-term; Dimethyl(K)@8		-8.82e-05	839.512	420.763	839.512	420.763	2														80.28	38.05	12075.4	466.6
P00560	Phosphoglycerate kinase	AGAEIVPK	0	99	Dimethyl@N-term; Dimethyl(K)@8		-8.82e-05	839.512	420.763	839.512	420.763	2														80.28	38.05	12075.4	466.6
P00560	Phosphoglycerate kinase	ELPGVAFL	0	85	Dimethyl@N-term	cleaved L-S@C-term	-0.000106384	872.501	437.258	872.501	437.258	2														0	0	592.67	120.52
P00560	Phosphoglycerate kinase	ELPGVAFLSEK	2	99	Dimethyl@N-term; Dimethyl(K)@11		-0.000160482	1244.7	623.358	1244.7	623.358	2														108.95	75.14	32085	1282.74
P00560	Phosphoglycerate kinase	DVTFLNDCVGPEVEAAVK	0	99	Dimethyl:2H(6)13C(2)@N-term; Deamidated(N)@6; Carbamidomethyl(C)@8; Dimethyl:2H(6)13C(2)(K)@18		-0.000299424	2035.08	1018.54	2035.08	1018.55	2														44.69	38.89	690.57	161.04
P00560	Phosphoglycerate kinase	EGIPAGWQGLDNGPESR	0	99	Dimethyl@N-term; Deamidated(N)@12		-0.000358072	1810.85	906.431	1810.85	906.432	2														686.21	190.31	979.04	213.76
P00560	Phosphoglycerate kinase	AHSSMVGFDLPQR	2	99	Dimethyl@N-term		-0.000386496	1471.72	491.582	1471.72	491.582	3														856.05	198.29	9303.8	653.73
P00560	Phosphoglycerate kinase	AHSSMVGFDLPQR	0	99	Dimethyl@N-term		-0.000386496	1471.72	491.582	1471.72	491.582	3														856.05	198.3	9303.8	653.72
P00560	Phosphoglycerate kinase	VLENTEIGDSIFDK	0	99	Dimethyl@N-term; Deamidated(N)@4; Dimethyl(K)@14		-0.000459895	1635.82	818.919	1635.82	818.919	2														480.76	151.57	1318.38	254.08
P00560	Phosphoglycerate kinase	VLENTEIGDSIFDK	0	80	Dimethyl@N-term; Deamidated(N)@4; Dimethyl(K)@14		-0.000459895	1635.82	818.919	1635.82	818.919	2														480.76	151.57	1318.38	254.08
P00560	Phosphoglycerate kinase	VLENTEIGDSIFDK	2	99	Dimethyl@N-term; Dimethyl(K)@14		-0.000594637	1634.84	545.954	1634.84	545.954	3														103.05	86.49	10925.4	778.88
P00560	Phosphoglycerate kinase	VLENTEIGDSIFDK	0	99	Dimethyl@N-term; Dimethyl(K)@14		-0.000594637	1634.84	545.954	1634.84	545.954	3														103.05	86.49	10925.4	778.88
P00560	Phosphoglycerate kinase	LFAATVAK	0	48	Dimethyl:2H(6)13C(2)@N-term; Dimethyl:2H(6)13C(2)(K)@8		-0.000328364	891.636	446.825	891.637	446.826	2														617.86	156.24	3813.62	429.98
P00560	Phosphoglycerate kinase	YSLAPVAK	2	99	Dimethyl@N-term; Dimethyl(K)@8		-0.000407044	903.543	452.779	903.543	452.779	2														0	0	16703.9	791.64
P00560	Phosphoglycerate kinase	YSLAPVAK	0	99	Dimethyl@N-term; Dimethyl(K)@8		-0.000407044	903.543	452.779	903.543	452.779	2														0	0	16703.9	791.66
P00560	Phosphoglycerate kinase	YSLAPVAK	0	99	Dimethyl@N-term; Dimethyl(K)@8		-0.000407044	903.543	452.779	903.543	452.779	2														0	0	16703.9	791.65
P00560	Phosphoglycerate kinase	DVTFLNDCVGPEVEAAVK	2	99	Dimethyl@N-term; Deamidated(N)@6; Carbamidomethyl(C)@8; Dimethyl(K)@18		-0.00103592	2018.99	1010.5	2018.99	1010.5	2														42.58	38.1	624.58	153.48
P00560	Phosphoglycerate kinase	SSAAGNTVIIGGGDTATVAK	0	88	No Dimethyl@N-term; Dimethyl:2H(6)13C(2)(K)@20		-0.00109376	1825	913.505	1825	913.506	2														0	0	1404.29	265
P00560	Phosphoglycerate kinase	AGAEIVPK	0	99	Dimethyl:2H(6)13C(2)@N-term; Dimethyl:2H(6)13C(2)(K)@8		-0.000516722	855.6	428.807	855.6	428.807	2														84.15	38.78	15109.7	506.77
P00560	Phosphoglycerate kinase	AGAEIVPK	0	61	Dimethyl:2H(6)13C(2)@N-term; Dimethyl:2H(6)13C(2)(K)@8		-0.000516722	855.6	428.807	855.6	428.807	2														80.28	38.05	12075.4	466.57
P00560	Phosphoglycerate kinase	EGIPAGWQGLDNGPESR	0	99	Dimethyl:2H(6)13C(2)@N-term		-0.00113689	1817.91	909.961	1817.91	909.962	2														182.29	94.95	2955.96	387.09
P00560	Phosphoglycerate kinase	EGIPAGWQGLDNGPESR	0	99	Dimethyl:2H(6)13C(2)@N-term		-0.00113689	1817.91	909.961	1817.91	909.962	2														182.29	94.95	2955.96	387.18
P00560	Phosphoglycerate kinase	EGIPAGWQGLDNGPESR	0	83	Dimethyl:2H(6)13C(2)@N-term		-0.00113689	1817.91	909.961	1817.91	909.962	2														181.26	94.67	2955.96	387.08
P00560	Phosphoglycerate kinase	TIVWNGPPGVFEFEK	0	99	Dimethyl:2H(6)13C(2)@N-term; Deamidated(N)@5; Dimethyl:2H(6)13C(2)(K)@15		-0.00114397	1792	897.008	1792	897.008	2														92.51	48.04	1270.43	185.13
P00560	Phosphoglycerate kinase	TIVWNGPPGVFEFEK	0	99	Dimethyl:2H(6)13C(2)@N-term; Deamidated(N)@5; Dimethyl:2H(6)13C(2)(K)@15		-0.00114397	1792	897.008	1792	897.008	2														92.51	48.1	1270.43	185.1
P00560	Phosphoglycerate kinase	SSAAGNTVIIGGGDTATVAK	0	99	Delta:H(2)C(2)@N-term; Dimethyl(K)@20		-0.00119896	1842.97	615.33	1842.97	615.33	3														182.63	106.38	88.6	100.07
P00560	Phosphoglycerate kinase	LSVQDLDLK	0	99	Dimethyl:2H(6)13C(2)@N-term; Dimethyl:2H(6)13C(2)(K)@9		-0.000747324	1101.72	551.868	1101.72	551.868	2														0	0	56712.8	1754.77
P00560	Phosphoglycerate kinase	LSVQDLDLK	0	99	Dimethyl:2H(6)13C(2)@N-term; Dimethyl:2H(6)13C(2)(K)@9		-0.000747324	1101.72	551.868	1101.72	551.868	2														0	0	56712.8	1754.79
P00560	Phosphoglycerate kinase	LSVQDLDLK	0	99	Dimethyl:2H(6)13C(2)@N-term; Dimethyl:2H(6)13C(2)(K)@9		-0.000747324	1101.72	551.868	1101.72	551.868	2														0	0	56712.8	1754.79
P00560	Phosphoglycerate kinase	LSVQDLDLK	0	67	Dimethyl:2H(6)13C(2)@N-term; Dimethyl:2H(6)13C(2)(K)@9		-0.000747324	1101.72	551.868	1101.72	551.868	2														0	0	56712.8	1754.83
P00560	Phosphoglycerate kinase	EGIPAGWQGLDNGPESR	2	99	Dimethyl@N-term		-0.00125485	1809.86	905.939	1809.86	905.94	2														182.29	94.95	2955.96	387.09
P00560	Phosphoglycerate kinase	TIVWNGPPGVFEFEK	0	99	Dimethyl:2H(6)13C(2)@N-term; Deamidated(N)@5; Dimethyl:2H(6)13C(2)(K)@15		-0.00151019	1792	897.008	1792	897.008	2														0	0	2016.87	266.62
P00560	Phosphoglycerate kinase	TIVWNGPPGVFEFEK	0	99	Dimethyl@N-term; Dimethyl(K)@15		-0.00155496	1774.93	592.65	1774.93	592.65	3														47.13	41.51	3426.36	364.44
P00560	Phosphoglycerate kinase	VDFNVPLDGKK	0	99	Dimethyl@N-term; Dimethyl(K)@10; Dimethyl(K)@11	missed K-K@10	-0.00115671	1314.75	658.384	1314.75	658.385	2														105.55	73.27	484.68	155.4
P00560	Phosphoglycerate kinase	TVIIGGGDTATVAK	0	71	Dimethyl@N-term; Dimethyl(K)@14	cleaved N-T@N-term	-0.0012688	1357.78	679.898	1357.78	679.898	2														136.83	85.86	663.98	182.54
P00560	Phosphoglycerate kinase	AHSSMVGFDLPQR	0	99	Delta:H(2)C(2)@N-term		-0.00138458	1469.71	735.861	1469.71	735.862	2
P00560	Phosphoglycerate kinase	ALLDEVVK	2	99	Delta:H(2)C(2)@N-term; Dimethyl(K)@8		-0.000918101	939.563	470.789	939.564	470.789	2														62.36	66.14	202.65	99.51
P00560	Phosphoglycerate kinase	VDFNVPLDGKK	0	99	Dimethyl@N-term; Dimethyl(K)@10; Dimethyl(K)@11	missed K-K@10	-0.00132176	1314.75	658.384	1314.75	658.385	2														0	0	2017.2	386.67
P00560	Phosphoglycerate kinase	VLENTEIGDSIFDK	0	99	Dimethyl:2H(6)13C(2)@N-term; Deamidated(N)@4; Dimethyl:2H(6)13C(2)(K)@14		-0.00169217	1651.91	826.963	1651.91	826.964	2														310.74	123.18	1541.02	274.17
P00560	Phosphoglycerate kinase	ELQSLLGK	2	99	Dimethyl@N-term; Dimethyl(K)@8		-0.000973004	942.574	472.294	942.575	472.295	2														81.97	100.13	23257.9	2171.87
P00560	Phosphoglycerate kinase	ELQSLLGK	0	99	Dimethyl@N-term; Dimethyl(K)@8		-0.000973004	942.574	472.294	942.575	472.295	2														55.62	107.49	23257.9	2171.84
P00560	Phosphoglycerate kinase	ELQSLLGK	0	18	Dimethyl@N-term; Dimethyl(K)@8		-0.000973004	942.574	472.294	942.575	472.295	2														55.13	106.93	23257.9	2171.88
P00560	Phosphoglycerate kinase	VLENTEIGDSIFDK	0	99	Delta:H(2)C(2)@N-term; Dimethyl(K)@14		-0.00174177	1632.82	817.419	1632.82	817.42	2														127.83	61.95	10.42	19.15
P00560	Phosphoglycerate kinase	VDFNVPLDGK	0	99	Dimethyl@N-term; Dimethyl(K)@10		-0.00124534	1158.63	580.321	1158.63	580.322	2														740.92	191.26	31173.4	1258.73
P00560	Phosphoglycerate kinase	ASAPGSVILLENLR	0	99	Dimethyl:2H(6)13C(2)@N-term		-0.0016581	1474.89	492.637	1474.89	492.637	3														118.58	69.76	4917.68	428.41
P00560	Phosphoglycerate kinase	EGIPAGWQGLDNGPESR	0	99	Dimethyl:2H(6)13C(2)@N-term; Deamidated(N)@12		-0.00207128	1818.89	910.453	1818.89	910.454	2														169.15	96.17	1226.78	261.41
P00560	Phosphoglycerate kinase	DVTFLNDCVGPEVEAAVK	0	99	Dimethyl:2H(6)13C(2)@N-term; Carbamidomethyl(C)@8; Dimethyl:2H(6)13C(2)(K)@18		-0.0023973	2034.09	1018.05	2034.09	1018.05	2														136.75	76.22	2645.25	334.3
P00560	Phosphoglycerate kinase	DVTFLNDCVGPEVEAAVK	0	99	Dimethyl:2H(6)13C(2)@N-term; Carbamidomethyl(C)@8; Dimethyl:2H(6)13C(2)(K)@18		-0.0023973	2034.09	1018.05	2034.09	1018.05	2														136.75	76.21	2645.25	334.26
P00560	Phosphoglycerate kinase	DVTFLNDCVGPEVEAAVK	0	99	Dimethyl:2H(6)13C(2)@N-term; Carbamidomethyl(C)@8; Dimethyl:2H(6)13C(2)(K)@18		-0.0023973	2034.09	1018.05	2034.09	1018.05	2														136.21	76.07	2623.15	332.74
P00560	Phosphoglycerate kinase	DVTFLNDCVGPEVEAAVK	0	22	Dimethyl:2H(6)13C(2)@N-term; Carbamidomethyl(C)@8; Dimethyl:2H(6)13C(2)(K)@18		-0.0023973	2034.09	1018.05	2034.09	1018.05	2														136.75	76.21	2645.25	334.15
P00560	Phosphoglycerate kinase	ASAPGSVILLENLR	0	99	Delta:H(2)C(2)@N-term		-0.00174413	1464.83	733.421	1464.83	733.422	2
P00560	Phosphoglycerate kinase	ASAPGSVILLENLR	0	99	Delta:H(2)C(2)@N-term		-0.00174413	1464.83	733.421	1464.83	733.422	2
P00560	Phosphoglycerate kinase	YHIEEEGSR	0	93	Dimethyl:2H(6)13C(2)@N-term		-0.00142518	1154.57	385.865	1154.57	385.866	3														0	0	1215.98	110.36
P00560	Phosphoglycerate kinase	VDFNVPLDGKK	0	99	Dimethyl:2H(6)13C(2)@N-term; Dimethyl:2H(6)13C(2)(K)@10; Dimethyl:2H(6)13C(2)(K)@11	missed K-K@10	-0.0016961	1338.89	447.303	1338.89	447.303	3														0	0	1808.17	299.52
P00560	Phosphoglycerate kinase	LSVQDLDLK	0	99	Delta:H(2)C(2)@N-term; Dimethyl(K)@9		-0.00147241	1083.62	542.815	1083.62	542.816	2														332.85	127.51	97.7	68.08
P00560	Phosphoglycerate kinase	ELQSLLGK	0	99	Dimethyl:2H(6)13C(2)@N-term; Dimethyl:2H(6)13C(2)(K)@8		-0.00130773	958.662	480.339	958.664	480.339	2														309.85	250.05	29281.8	2429.56
P00560	Phosphoglycerate kinase	ELQSLLGK	0	99	Dimethyl:2H(6)13C(2)@N-term; Dimethyl:2H(6)13C(2)(K)@8		-0.00130773	958.662	480.339	958.664	480.339	2														152.75	176.13	51688.8	3227.96
P00560	Phosphoglycerate kinase	VDFNVPLDGK	2	99	Dimethyl:2H(6)13C(2)@N-term; Dimethyl:2H(6)13C(2)(K)@10		-0.00175574	1174.72	588.365	1174.72	588.366	2														1134.61	235.05	35910.8	1348.94
P00560	Phosphoglycerate kinase	VDFNVPLDGK	0	99	Dimethyl:2H(6)13C(2)@N-term; Dimethyl:2H(6)13C(2)(K)@10		-0.00175574	1174.72	588.365	1174.72	588.366	2														1134.61	234.88	35910.8	1348.96
P00560	Phosphoglycerate kinase	LAILGGAK	1	99	Dimethyl@N-term; Dimethyl(K)@8	cleaved F-L@N-term	-0.00130079	797.536	399.775	797.537	399.776	2														37.11	41.83	3234.56	409.03
P00560	Phosphoglycerate kinase	VLENTEIGDSIFDK	0	98	Dimethyl@N-term; Dimethyl(K)@14		-0.00277892	1634.84	818.426	1634.84	818.427	2														0	0	467.09	156.76
P00560	Phosphoglycerate kinase	TIVWNGPPGVFEFEK	0	99	Dimethyl:2H(6)13C(2)@N-term; Dimethyl:2H(6)13C(2)(K)@15		-0.00309712	1791.02	896.515	1791.02	896.516	2														86.34	57.11	16638.5	801.66
P00560	Phosphoglycerate kinase	TIVWNGPPGVFEFEK	0	99	Dimethyl:2H(6)13C(2)@N-term; Dimethyl:2H(6)13C(2)(K)@15		-0.00309712	1791.02	896.515	1791.02	896.516	2														86.34	57.05	16638.5	801.63
P00560	Phosphoglycerate kinase	AAGFLLEK	2	99	Dimethyl:2H(6)13C(2)@N-term; Dimethyl:2H(6)13C(2)(K)@8		-0.00168132	919.63	460.822	919.632	460.823	2														26.41	35.87	38117.1	1666.87
P00560	Phosphoglycerate kinase	AAGFLLEK	0	99	Dimethyl:2H(6)13C(2)@N-term; Dimethyl:2H(6)13C(2)(K)@8		-0.00168132	919.63	460.822	919.632	460.823	2														37.08	43.74	38117.1	1666.87
P00560	Phosphoglycerate kinase	AAGFLLEK	0	97	Dimethyl:2H(6)13C(2)@N-term; Dimethyl:2H(6)13C(2)(K)@8		-0.00168132	919.63	460.822	919.632	460.823	2														19.89	31.59	38117.1	1667.22
P00560	Phosphoglycerate kinase	AAGFLLEK	0	78	Dimethyl:2H(6)13C(2)@N-term; Dimethyl:2H(6)13C(2)(K)@8		-0.00168132	919.63	460.822	919.632	460.823	2														36.28	41.83	38117.1	1666.87
P00560	Phosphoglycerate kinase	ELPGVAFLSEK	0	63	Dimethyl:2H(6)13C(2)@N-term; Dimethyl:2H(6)13C(2)(K)@11		-0.00236977	1260.79	631.401	1260.79	631.402	2														130.3	90.77	921.42	198.11
P00560	Phosphoglycerate kinase	LSVQDLDLKDK	0	46	No Dimethyl@N-term; Deamidated(Q)@4; Dimethyl(K)@9; Dimethyl(K)@11	missed K-D@9	-0.00255658	1329.74	665.875	1329.74	665.877	2														283.68	83	0	0
P00560	Phosphoglycerate kinase	LSVQDLDLKDK	0	41	Dimethyl@N-term; Deamidated(Q)@4; Dimethyl(K)@9; Dimethyl(K)@11	missed K-D@9	-0.00267178	1357.77	679.891	1357.77	679.893	2														530.25	114.01	0	0
P00560	Phosphoglycerate kinase	EGIPAGWQGLDNGPESR	0	94	Dimethyl@N-term		-0.00368744	1809.86	604.294	1809.86	604.295	3														166.35	92.36	2093.06	326.49
P00560	Phosphoglycerate kinase	EGIPAGWQGLDNGPESR	0	44	Dimethyl@N-term		-0.00368744	1809.86	604.294	1809.86	604.295	3														166.35	92.16	2093.06	326.16
P00560	Phosphoglycerate kinase	LFAATVAK	1	92	Dimethyl@N-term; Dimethyl(K)@8		-0.00185741	875.546	438.78	875.548	438.781	2														799.97	176.45	3780.41	428.16
P00560	Phosphoglycerate kinase	YSLAPVAK	0	84	Delta:H(2)C(2)@N-term; Dimethyl(K)@8		-0.00192395	901.525	451.77	901.527	451.771	2														284.6	116.54	0	0
P00560	Phosphoglycerate kinase	ASAPGSVILLENL	2	99	Dimethyl:2H(6)13C(2)@N-term	cleaved L-R@C-term	-0.00285557	1318.79	660.4	1318.79	660.402	2														0	0	481.03	107.53
P00560	Phosphoglycerate kinase	TVTDKEGIPAGWQGLDNGPESR	0	99	Dimethyl@N-term; Dimethyl(K)@5; Deamidated(N)@17	missed K-E@5	-0.00536376	2383.16	795.394	2383.17	795.396	3														0	0	1261.97	257.91
P00560	Phosphoglycerate kinase	LAILGGAK	0	98	Dimethyl:2H(6)13C(2)@N-term; Dimethyl:2H(6)13C(2)(K)@8	cleaved F-L@N-term	-0.00189324	813.624	407.819	813.626	407.82	2														0	0	4051.11	456.67
P00560	Phosphoglycerate kinase	ELQSLLGK	0	96	Delta:H(2)C(2)@N-term; Dimethyl(K)@8		-0.00220433	940.557	471.286	940.559	471.287	2														85.11	67.67	302.65	127.53
P00560	Phosphoglycerate kinase	ELQSLLGK	0	20	Delta:H(2)C(2)@N-term; Dimethyl(K)@8		-0.00220433	940.557	471.286	940.559	471.287	2														0	0	302.65	127.47
P00560	Phosphoglycerate kinase	VDFNVPLDGK	0	72	Dimethyl:2H(6)13C(2)@N-term; Dimethyl:2H(6)13C(2)(K)@10		-0.00309852	1174.71	588.364	1174.72	588.366	2														222.79	94.83	1005.26	211.81
P00560	Phosphoglycerate kinase	ALENPTRPF	0	93	Dimethyl:2H(6)13C(2)@N-term	cleaved F-L@C-term	-0.00293322	1079.61	540.814	1079.62	540.815	2														263.63	154.3	5632.76	580.09
P00560	Phosphoglycerate kinase	YHIEEEGSR	2	99	Dimethyl:2H(6)13C(2)@N-term		-0.0033198	1154.57	578.293	1154.57	578.295	2														0	0	948.86	97.48
P00560	Phosphoglycerate kinase	AAGFLLEK	0	86	Delta:H(2)C(2)@N-term; Dimethyl(K)@8		-0.00272782	901.525	451.77	901.527	451.771	2														148.96	86.82	734.32	182.93
P00560	Phosphoglycerate kinase	TVTDKEGIPAGWQGLDNGPESR	0	99	Dimethyl:2H(6)13C(2)@N-term; Dimethyl:2H(6)13C(2)(K)@5; Deamidated(N)@17	missed K-E@5	-0.00763406	2399.25	800.756	2399.25	800.759	3														0	0	1261.97	257.94
P00560	Phosphoglycerate kinase	YHIEEEGSR	0	64	Dimethyl@N-term		-0.00381457	1146.53	574.271	1146.53	574.273	2														0	0	948.86	97.48
P00560	Phosphoglycerate kinase	ELPGVAFLSEK	0	99	Delta:H(2)C(2)@N-term; Dimethyl(K)@11		-0.00439085	1242.68	622.348	1242.69	622.35	2														127.51	64.28	68.71	46.38
P00560	Phosphoglycerate kinase	KLFAATVAK	2	99	Dimethyl@N-term; Dimethyl(K)@1; Dimethyl(K)@9	missed K-L@1	-0.00374279	1031.67	516.842	1031.67	516.844	2														0	0	688.66	139.38
P00560	Phosphoglycerate kinase	KLFAATVAK	0	99	Dimethyl@N-term; Dimethyl(K)@1; Dimethyl(K)@9	missed K-L@1	-0.00374279	1031.67	516.842	1031.67	516.844	2														0	0	688.66	139.38
P00560	Phosphoglycerate kinase	ELPGVAFL	2	99	Dimethyl:2H(6)13C(2)@N-term	cleaved L-S@C-term	-0.00359999	880.542	441.278	880.545	441.28	2														0	0	623.54	123.48
P00560	Phosphoglycerate kinase	ASAPGSVILLENLR	0	99	Dimethyl@N-term; Deamidated(N)@12		-0.00610961	1467.82	734.919	1467.83	734.922	2														653.22	173.01	942.67	235.98
P00560	Phosphoglycerate kinase	ASAPGSVILLENLR	0	99	Dimethyl@N-term; Deamidated(N)@12		-0.00610961	1467.82	734.919	1467.83	734.922	2														653.22	173.02	942.67	235.93
P00560	Phosphoglycerate kinase	KYGVTDK	0	67	Dimethyl:2H(6)13C(2)@N-term; Dimethyl:2H(6)13C(2)(K)@1; Dimethyl:2H(6)13C(2)(K)@7	missed K-Y@1	-0.00415348	917.651	459.833	917.655	459.835	2														2.63	4.22	153.03	24.91
P00560	Phosphoglycerate kinase	TIVWNGPPGVFEFEK	0	99	Dimethyl:2H(6)13C(2)@N-term; Dimethyl:2H(6)13C(2)(K)@15		-0.00950797	1791.01	598.01	1791.02	598.013	3														15.39	25.17	3883.52	387.29
P00560	Phosphoglycerate kinase	TIVWNGPPGVFEFEK	0	99	Dimethyl:2H(6)13C(2)@N-term; Dimethyl:2H(6)13C(2)(K)@15		-0.00950797	1791.01	598.01	1791.02	598.013	3														15.39	25.17	3883.52	387.32
P00560	Phosphoglycerate kinase	TIVWNGPPGVFEFEK	0	99	Dimethyl:2H(6)13C(2)@N-term; Dimethyl:2H(6)13C(2)(K)@15		-0.00950797	1791.01	598.01	1791.02	598.013	3														15.39	25.17	3883.52	387.31
P00560	Phosphoglycerate kinase	SSAAGNTVIIGGGDTATVAK	0	99	Dimethyl:2H(6)13C(2)@N-term; Dimethyl:2H(6)13C(2)(K)@20		-0.0101855	1861.06	621.362	1861.07	621.365	3														0	0	903.98	312.37
P00560	Phosphoglycerate kinase	SSAAGNTVIIGGGDTATVAK	0	36	Dimethyl:2H(6)13C(2)@N-term; Dimethyl:2H(6)13C(2)(K)@20		-0.0101855	1861.06	621.362	1861.07	621.365	3														0	0	903.98	312.01
P00560	Phosphoglycerate kinase	TIVWNGPPGVFEFEK	0	68	Dimethyl:2H(6)13C(2)@N-term; Trp->Kynurenin(W)@4; Pro->pyro-Glu(P)@7; Dimethyl:2H(6)13C(2)(K)@15		-0.0169016	1808.98	603.999	1808.99	604.005	3														101.01	62.62	193.01	86.59
P00560	Phosphoglycerate kinase	EGIPAGWQGLDNGPESR	0	24	Dimethyl:2H(6)13C(2)@N-term		-0.0178111	1817.89	606.971	1817.91	606.977	3														342.91	133.23	885.54	195.3
P00560	Phosphoglycerate kinase	TVTDKEGIPAGWQGLDNGPESR	0	99	Dimethyl:2H(6)13C(2)@N-term; Dimethyl:2H(6)13C(2)(K)@5	missed K-E@5	-0.0244795	2398.25	800.423	2398.27	800.431	3														0	0	793.43	217.61
P00560	Phosphoglycerate kinase	TIVWNGPPGVFEFEK	2	99	Dimethyl:2H(6)13C(2)@N-term; Dehydrated(T)@1; Dimethyl:2H(6)13C(2)(K)@15		-0.0337945	1772.97	887.494	1773.01	887.511	2														0	0	0	0
P00560	Phosphoglycerate kinase	YSLAPVAK	0	96	Dimethyl:2H(6)13C(2)@N-term; Dimethyl:2H(6)13C(2)(K)@8		-0.019018	919.613	460.814	919.632	460.823	2														0	0	21657.5	897.83
P00560	Phosphoglycerate kinase	YSLAPVAK	0	92	Dimethyl:2H(6)13C(2)@N-term; Dimethyl:2H(6)13C(2)(K)@8		-0.019018	919.613	460.814	919.632	460.823	2														0	0	21657.5	897.83
P00560	Phosphoglycerate kinase	TIVWNGPPGVFEFEK	0	99	Dimethyl:2H(6)13C(2)@N-term; Oxidation(W)@4; Dimethyl:2H(6)13C(2)(K)@15		-0.0389921	1806.97	603.332	1807.01	603.345	3														0	0	115.73	63.41
P47124	Putative glycosyltransferase HOC1	QTPPEATLR	2	99	Dimethyl@N-term		0.00130345	1039.57	520.791	1039.57	520.79	2														0	0	647.66	112
P47124	Putative glycosyltransferase HOC1	LLSDVLVFPK	0	99	Delta:H(2)C(2)@N-term; Dimethyl(K)@10		-0.00108817	1183.72	592.868	1183.72	592.868	2														0	0	2.13	7.37
P47124	Putative glycosyltransferase HOC1	LLSDVLVFPK	2	99	Dimethyl@N-term; Dimethyl(K)@10		-0.00458306	1185.73	593.874	1185.74	593.876	2														0	0	1255.58	228.29
P47124	Putative glycosyltransferase HOC1	LLSDVLVFPK	0	99	Dimethyl:2H(6)13C(2)@N-term; Dimethyl:2H(6)13C(2)(K)@10		-0.00496311	1201.82	601.918	1201.83	601.92	2														0	0	1638.67	259.83
P47124	Putative glycosyltransferase HOC1	LLSDVLVFPK	0	99	Dimethyl:2H(6)13C(2)@N-term; Dimethyl:2H(6)13C(2)(K)@10		-0.00496311	1201.82	601.918	1201.83	601.92	2														0	0	1638.67	259.82
P40169	Uncharacterized plasma membrane protein YNL194C	TVTSAGDEPDRVQEER	2	99	Dimethyl@N-term	missed R-V@11	-0.00615456	1815.85	606.292	1815.86	606.294	3
P40169	Uncharacterized plasma membrane protein YNL194C	MAAQPFSPR	1	96	Dimethyl@N-term		0.00565514	1031.53	516.771	1031.52	516.768	2
Q99321	Diphosphoinositol polyphosphate phosphohydrolase DDP1	GGVEKDEPNYETTAQR	2	99	Dimethyl:2H(4)@N-term; Dimethyl:2H(4)(K)@5	missed K-D@5	-0.00178274	1856.93	619.985	1856.94	619.986	3														157.07	45.59	41.48
P43588	26S proteasome regulatory subunit RPN11	LIDTGALINNLEPR	2	99	Dimethyl@N-term		0.0137339	1565.89	522.971	1565.88	522.966	3														0	0	217.9	90.49
P43588	26S proteasome regulatory subunit RPN11	AVAVVVDPIQSVK	2	99	Dimethyl:2H(6)13C(2)@N-term; Dimethyl:2H(6)13C(2)(K)@13		-0.00315274	1395.92	698.97	1395.93	698.971	2														0	0	1105.65	225.84
P43588	26S proteasome regulatory subunit RPN11	AVAVVVDPIQSVK	0	99	Dimethyl:2H(6)13C(2)@N-term; Dimethyl:2H(6)13C(2)(K)@13		-0.00315274	1395.92	698.97	1395.93	698.971	2														0	0	1105.65	225.83
Q3E764	Translation machinery-associated protein 7	QQQDLDPEDIAFK	2	99	Dimethyl@N-term; Deamidated(Q)@3; Dimethyl(K)@13		0.0156695	1602.79	802.404	1602.78	802.396	2														0	0	1322.97	277.8
Q3E764	Translation machinery-associated protein 7	QQQDLDPEDIAFK	0	76	Gln->pyro-Glu@N-term; Dimethyl(K)@13		0.00147054	1556.74	779.376	1556.74	779.375	2														380.1	138.03	0	0
Q3E764	Translation machinery-associated protein 7	QQQDLDPEDIAFK	0	99	Dimethyl@N-term; Dimethyl(K)@13		-0.00117013	1601.79	801.904	1601.79	801.904	2														0	0	1322.97	277.65
Q3E764	Translation machinery-associated protein 7	QQQDLDPEDIAFK	0	99	Dimethyl@N-term; Dimethyl(K)@13		-0.00162629	1601.79	534.938	1601.79	534.939	3														0	0	1009.71	238.62
Q3E764	Translation machinery-associated protein 7	QQQDLDPEDIAFK	0	99	Dimethyl:2H(6)13C(2)@N-term; Dimethyl:2H(6)13C(2)(K)@13		-0.0325564	1617.85	540.291	1617.88	540.301	3														0	0	1041.59	242.54
P23301	Eukaryotic translation initiation factor 5A-1	KLEDLSPSTHNMEVPVVK	0	15	Dimethyl@N-term; Dimethyl(K)@1; Deamidated(N)@11; Dimethyl(K)@18	missed K-L@1	0.0264772	2107.15	527.795	2107.12	527.788	4														0	0	4132.14	442.57
P23301	Eukaryotic translation initiation factor 5A-1	KLEDLSPSTHNMEVPVVK	0	94	Dimethyl:2H(6)13C(2)@N-term; Dimethyl:2H(6)13C(2)(K)@1; Deamidated(N)@11; Dimethyl:2H(6)13C(2)(K)@18	missed K-L@1	0.0219222	2131.28	533.827	2131.26	533.821	4														0	0	4308.55	451.71
P23301	Eukaryotic translation initiation factor 5A-1	APEGELGDSLQTAFDEGK	2	99	Dimethyl:2H(6)13C(2)@N-term; Deamidated(Q)@11; Dimethyl:2H(6)13C(2)(K)@18		0.0161808	1936.01	646.342	1935.99	646.337	3														65.58	53.29	3718.75	412.52
P23301	Eukaryotic translation initiation factor 5A-1	NGFVVIK	0	99	Dimethyl@N-term; Deamidated(N)@1; Dimethyl(K)@7		0.00196779	832.508	417.261	832.506	417.26	2														0	0	1695.65	484.82
P23301	Eukaryotic translation initiation factor 5A-1	KLEDLSPSTHNMEVPVVK	2	99	Dimethyl@N-term; Dimethyl(K)@1; Dimethyl(K)@18	missed K-L@1	0.00462765	2106.14	527.543	2106.14	527.542	4														0	0	4132.14	442.57
P23301	Eukaryotic translation initiation factor 5A-1	KLEDLSPSTHNMEVPVVK	0	99	Dimethyl@N-term; Dimethyl(K)@1; Dimethyl(K)@18	missed K-L@1	0.00462765	2106.14	527.543	2106.14	527.542	4														0	0	4132.14	442.53
P23301	Eukaryotic translation initiation factor 5A-1	DAGSSATYPMQCSALR	0	98	Dimethyl@N-term; Carbamidomethyl(C)@12	cleaved A-D@N-term	0.00365703	1741.78	871.897	1741.78	871.895	2														0	0	328.6	223.89
P23301	Eukaryotic translation initiation factor 5A-1	KLEDLSPSTHNMEVPVVK	0	99	Dimethyl:2H(6)13C(2)@N-term; Dimethyl:2H(6)13C(2)(K)@1; Dimethyl:2H(6)13C(2)(K)@18	missed K-L@1	0.00202579	2130.27	533.576	2130.27	533.575	4														0	0	4308.55	451.71
P23301	Eukaryotic translation initiation factor 5A-1	KLEDLSPSTHNMEVPVVK	0	99	Dimethyl:2H(6)13C(2)@N-term; Dimethyl:2H(6)13C(2)(K)@1; Dimethyl:2H(6)13C(2)(K)@18	missed K-L@1	0.00202579	2130.27	533.576	2130.27	533.575	4														0	0	4308.55	451.71
P23301	Eukaryotic translation initiation factor 5A-1	KLEDLSPSTHNMEVPVVK	0	99	Dimethyl:2H(6)13C(2)@N-term; Dimethyl:2H(6)13C(2)(K)@1; Dimethyl:2H(6)13C(2)(K)@18	missed K-L@1	0.00202579	2130.27	533.576	2130.27	533.575	4														0	0	4308.55	451.68
P23301	Eukaryotic translation initiation factor 5A-1	LEDLSPSTHNMEVPVVK	2	99	Dimethyl:2H(6)13C(2)@N-term; Dimethyl:2H(6)13C(2)(K)@17		0.00139956	1966.1	656.375	1966.1	656.375	3														36.97	41.83	1684.67	281.06
P23301	Eukaryotic translation initiation factor 5A-1	KNGFVVIK	0	79	Dimethyl:2H(6)13C(2)@N-term; Dimethyl:2H(6)13C(2)(K)@1; Deamidated(N)@2; Dimethyl:2H(6)13C(2)(K)@8	missed K-N@1	0.000593	1012.77	507.39	1012.77	507.39	2														0	0	1933.54	426.54
P23301	Eukaryotic translation initiation factor 5A-1	KLEDLSPSTHNMEVPVVK	0	99	Dimethyl:2H(6)13C(2)@N-term; Dimethyl:2H(6)13C(2)(K)@1; Dimethyl:2H(6)13C(2)(K)@18	missed K-L@1	0.000675453	2130.27	711.098	2130.27	711.098	3														0	0	4800.56	476.79
P23301	Eukaryotic translation initiation factor 5A-1	APEGELGDSLQTAFDEGK	0	99	Dimethyl@N-term; Dimethyl(K)@18		0.000149442	1918.92	640.646	1918.92	640.646	3														0	0	3718.75	412.52
P23301	Eukaryotic translation initiation factor 5A-1	APEGELGDSLQTAFDEGK	0	99	Dimethyl:2H(6)13C(2)@N-term; Dimethyl:2H(6)13C(2)(K)@18		-2.22e-05	1935	968.51	1935	968.51	2														0	0	3469.42	398.49
P23301	Eukaryotic translation initiation factor 5A-1	DDVKAPEGELGDSLQTAFDEGK	0	99	Dimethyl:2H(6)13C(2)@N-term; Dimethyl:2H(6)13C(2)(K)@4; Dimethyl:2H(6)13C(2)(K)@22	missed K-A@4	-0.000287887	2428.3	810.44	2428.3	810.44	3														0	0	634.82	197.05
P23301	Eukaryotic translation initiation factor 5A-1	KLEDLSPSTHNMEVPVVK	0	99	Dimethyl@N-term; Dimethyl(K)@1; Dimethyl(K)@18	missed K-L@1	-0.000399592	2106.14	703.054	2106.14	703.054	3														21.96	33.09	4353.66	454.53
P23301	Eukaryotic translation initiation factor 5A-1	KLEDLSPSTHNMEVPVVK	0	99	Dimethyl@N-term; Dimethyl(K)@1; Dimethyl(K)@18	missed K-L@1	-0.000399592	2106.14	703.054	2106.14	703.054	3														21.82	32.98	4353.66	454.55
P23301	Eukaryotic translation initiation factor 5A-1	DDVKAPEGELGDSLQTAFDEGK	2	99	Dimethyl@N-term; Dimethyl(K)@4; Dimethyl(K)@22	missed K-A@4	-0.00064941	2404.16	802.395	2404.16	802.395	3														0	0	623.1	195.26
P23301	Eukaryotic translation initiation factor 5A-1	APEGELGDSLQTAFDEGK	0	99	Dimethyl:2H(6)13C(2)@N-term; Dimethyl:2H(6)13C(2)(K)@18		-0.000664149	1935	646.009	1935	646.009	3														60.91	53.59	3732.06	413.31
P23301	Eukaryotic translation initiation factor 5A-1	APEGELGDSLQTAFDEGK	0	99	Dimethyl:2H(6)13C(2)@N-term; Dimethyl:2H(6)13C(2)(K)@18		-0.000664149	1935	646.009	1935	646.009	3														60.91	53.59	3732.06	413.42
P23301	Eukaryotic translation initiation factor 5A-1	APEGELGDSLQTAFDEGK	0	99	Dimethyl@N-term; Dimethyl(K)@18		-0.00160253	1918.91	960.465	1918.92	960.465	2														0	0	3431.57	396.35
P23301	Eukaryotic translation initiation factor 5A-1	KNGFVVIK	0	95	Dimethyl@N-term; Dimethyl(K)@1; Deamidated(N)@2; Dimethyl(K)@8	missed K-N@1	-0.00125306	988.631	495.323	988.632	495.323	2														0	0	1735.16	404.32
P23301	Eukaryotic translation initiation factor 5A-1	NGFVVIK	0	90	Dimethyl:2H(6)13C(2)@N-term; Deamidated(N)@1; Dimethyl:2H(6)13C(2)(K)@7		-0.00246135	848.592	425.303	848.595	425.305	2														0	0	1888.39	511.42
P23301	Eukaryotic translation initiation factor 5A-1	VHLVAIDIFTGK	2	99	Dimethyl@N-term; Dimethyl(K)@12		-0.00453627	1367.81	684.914	1367.82	684.916	2														194.37	87.56	595.08	149.55
P23301	Eukaryotic translation initiation factor 5A-1	VHLVAIDIFTGK	0	78	Dimethyl:2H(6)13C(2)@N-term; Dimethyl:2H(6)13C(2)(K)@12		-0.00478898	1383.9	692.958	1383.91	692.961	2														262.62	101.15	597.94	149.91
P23301	Eukaryotic translation initiation factor 5A-1	NGFVVIK	1	99	Dimethyl@N-term; Deamidated(N)@1; Dimethyl(K)@7		-0.00318387	832.503	417.259	832.506	417.26	2														0	0	788.8	399.12
P23301	Eukaryotic translation initiation factor 5A-1	NGFVVIK	0	33	Dimethyl:2H(6)13C(2)@N-term; Deamidated(N)@1; Dimethyl:2H(6)13C(2)(K)@7		-0.00481034	848.59	425.302	848.595	425.305	2														0	0	1048.16	459.7
P00942	Triosephosphate isomerase	SYFHEDDKFIADK	0	97	Dimethyl@N-term; Dimethyl(K)@8; Dimethyl(K)@13	missed K-F@8	1.00791	1698.84	425.717	1697.83	425.465	4														0	0	1647.86	421.15
P00942	Triosephosphate isomerase	ILYGGSANGSNAVTFK	0	18	Dimethyl:2H(6)13C(2)@N-term; Deamidated(N)@8; Deamidated(N)@11; Dimethyl:2H(6)13C(2)(K)@16		0.0308404	1671.96	558.327	1671.93	558.317	3														27.6	39.57	1355.88	252.24
P00942	Triosephosphate isomerase	WVILGHSER	0	78	Dimethyl:2H(6)13C(2)@N-term		0.00417582	1131.66	378.228	1131.66	378.227	3														0	0	992.7	328.37
P00942	Triosephosphate isomerase	ILYGGSANGSNAVTFK	0	77	Dimethyl:2H(6)13C(2)@N-term; Deamidated(N)@8; Dimethyl:2H(6)13C(2)(K)@16		0.0041079	1670.95	557.99	1670.95	557.989	3														27.6	39.57	1355.88	252.29
P00942	Triosephosphate isomerase	ASGAFTGENSVDQIK	0	99	Dimethyl:2H(6)13C(2)@N-term; Deamidated(N)@9; Dimethyl:2H(6)13C(2)(K)@15		0.00339701	1595.87	798.94	1595.86	798.938	2														0	0	1038.1	216.05
P00942	Triosephosphate isomerase	ASGAFTGENSVDQIKDVGAK	0	45	Dimethyl:2H(6)13C(2)@N-term; Dimethyl:2H(6)13C(2)(K)@15; Dimethyl:2H(6)13C(2)(K)@20	missed K-D@15	0.00421921	2101.21	701.409	2101.2	701.408	3														0	0	469.44	170.04
P00942	Triosephosphate isomerase	ASGAFTGENSVDQIK	0	76	Dimethyl@N-term; Deamidated(N)@9; Dimethyl(K)@15		0.00308573	1579.78	790.895	1579.77	790.894	2														67	69.95	302.87	130.08
P00942	Triosephosphate isomerase	ASGAFTGENSVDQIK	0	99	Dimethyl:2H(6)13C(2)@N-term; Deamidated(N)@9; Dimethyl:2H(6)13C(2)(K)@15		0.00278666	1595.86	798.939	1595.86	798.938	2														90.52	81.04	333.65	136.39
P00942	Triosephosphate isomerase	ADVDGFLVGGASLKPEFVDIINSR	0	95	Dimethyl@N-term; Dimethyl(K)@14		0.00294752	2574.37	859.131	2574.37	859.13	3														0	0	761.37	143.21
P00942	Triosephosphate isomerase	ASGAFTGENSVDQIKDVGAK	1	91	Dimethyl@N-term; Dimethyl(K)@15; Dimethyl(K)@20	missed K-D@15	0.0017505	2077.07	693.364	2077.07	693.364	3														0	0	418.45	160.69
P00942	Triosephosphate isomerase	KPQVTVGAQNAYLK	2	99	Dimethyl@N-term; Dimethyl(K)@1; Dimethyl(K)@14		0.00130583	1599.94	534.319	1599.93	534.319	3														54.13	55.97	171.57	77.22
P00942	Triosephosphate isomerase	KPQVTVGAQNAYLK	0	99	Dimethyl@N-term; Dimethyl(K)@1; Dimethyl(K)@14		0.00130583	1599.94	534.319	1599.93	534.319	3														54.13	55.96	171.57	77.12
P00942	Triosephosphate isomerase	DKADVDGFLVGGASLKPEFVDIINSR	2	99	Dimethyl@N-term; Dimethyl(K)@2; Dimethyl(K)@16	missed K-A@2	0.00211183	2845.52	712.388	2845.52	712.388	4														0	0	770.39	141.46
P00942	Triosephosphate isomerase	TFFVGGNFK	2	99	Delta:H(2)C(2)@N-term; Dimethyl(K)@9		0.000516924	1069.56	535.787	1069.56	535.787	2														43.09	38.91	129.45	70.92
P00942	Triosephosphate isomerase	ASGAFTGENSVDQIK	0	98	Dimethyl@N-term; Dimethyl(K)@15		0.000109146	1578.79	527.27	1578.79	527.27	3														237.88	109.4	1390.76	271.82
P00942	Triosephosphate isomerase	TFFVGGNFK	0	99	Dimethyl@N-term; Dimethyl(K)@9		-2.01e-05	1071.58	536.795	1071.58	536.795	2														0	0	2839.49	414.55
P00942	Triosephosphate isomerase	TFFVGGNFK	0	99	Dimethyl@N-term; Dimethyl(K)@9		-2.01e-05	1071.58	536.795	1071.58	536.795	2														0	0	2839.49	414.93
P00942	Triosephosphate isomerase	ASGAFTGENSVDQIK	0	99	Dimethyl@N-term; Deamidated(N)@9; Dimethyl(K)@15		-0.000210202	1579.77	790.894	1579.77	790.894	2														0	0	1038.1	216.14
P00942	Triosephosphate isomerase	ASGAFTGENSVDQIK	2	99	Dimethyl@N-term; Dimethyl(K)@15		-0.000214669	1578.79	790.402	1578.79	790.402	2														59.07	55.2	5227.82	527.42
P00942	Triosephosphate isomerase	ASGAFTGENSVDQIK	0	31	Dimethyl@N-term; Dimethyl(K)@15		-0.000214669	1578.79	790.402	1578.79	790.402	2														59.07	55.2	5227.82	527.43
P00942	Triosephosphate isomerase	ADVDGFLVGGASLKPEFVDIINSR	1	98	Dimethyl:2H(6)13C(2)@N-term; Dimethyl:2H(6)13C(2)(K)@14		-0.000435364	2590.46	864.493	2590.46	864.493	3														0	0	805.99	147.16
P00942	Triosephosphate isomerase	ILYGGSANGSNAVTFK	0	99	Dimethyl:2H(6)13C(2)@N-term; Deamidated(N)@8; Dimethyl:2H(6)13C(2)(K)@16		-0.000712025	1670.94	836.48	1670.95	836.48	2														520.2	161.55	8525.73	632.26
P00942	Triosephosphate isomerase	TFFVGGNFK	0	99	Dimethyl:2H(6)13C(2)@N-term; Dimethyl:2H(6)13C(2)(K)@9		-0.000535218	1087.66	544.839	1087.66	544.839	2														119.13	81.76	3473.33	457.64
P00942	Triosephosphate isomerase	TFFVGGNFK	0	29	Dimethyl:2H(6)13C(2)@N-term; Dimethyl:2H(6)13C(2)(K)@9		-0.000535218	1087.66	544.839	1087.66	544.839	2														121.88	84.55	3473.33	457.74
P00942	Triosephosphate isomerase	ILYGGSANGSNAVTFK	2	99	Dimethyl@N-term; Deamidated(N)@8; Dimethyl(K)@16		-0.000945436	1654.86	828.435	1654.86	828.436	2														199.88	106.62	8319.55	624.74
P00942	Triosephosphate isomerase	ASGAFTGENSVDQIK	0	99	Dimethyl:2H(6)13C(2)@N-term; Dimethyl:2H(6)13C(2)(K)@15		-0.00100207	1594.88	798.446	1594.88	798.446	2														95.87	69.59	5646.43	547.71
P00942	Triosephosphate isomerase	ASGAFTGENSVDQIK	0	99	Dimethyl:2H(6)13C(2)@N-term; Dimethyl:2H(6)13C(2)(K)@15		-0.00100207	1594.88	798.446	1594.88	798.446	2														95.87	69.6	5646.43	547.71
P00942	Triosephosphate isomerase	ASGAFTGENSVDQIK	0	63	Dimethyl:2H(6)13C(2)@N-term; Dimethyl:2H(6)13C(2)(K)@15		-0.00100207	1594.88	798.446	1594.88	798.446	2														95.87	69.6	5646.43	547.71
P00942	Triosephosphate isomerase	WVILGHSER	1	93	Dimethyl@N-term		-0.000743499	1123.61	375.545	1123.61	375.545	3														0	0	818.13	298.4
P00942	Triosephosphate isomerase	ASGAFTGENSVDQIK	0	99	Delta:H(2)C(2)@N-term; Dimethyl(K)@15		-0.00118923	1576.77	789.393	1576.77	789.394	2														0	0	0	0
P00942	Triosephosphate isomerase	SYFHEDDKFIADK	0	25	Dimethyl@N-term; Dimethyl(K)@8; Dimethyl(K)@13	missed K-F@8	-0.00164288	1697.83	849.922	1697.83	849.922	2														0	0	178.8	138.77
P00942	Triosephosphate isomerase	QLNAVLEEVK	0	99	Dimethyl:2H(6)13C(2)@N-term; Dimethyl:2H(6)13C(2)(K)@10		-0.00145517	1213.78	607.899	1213.79	607.9	2														0	0	2625.19	328.91
P00942	Triosephosphate isomerase	SYFHEDDKFIADK	0	91	Dimethyl:2H(6)13C(2)@N-term; Dimethyl:2H(6)13C(2)(K)@8; Dimethyl:2H(6)13C(2)(K)@13	missed K-F@8	-0.00219146	1721.96	431.498	1721.96	431.498	4														0	0	1957.42	458.6
P00942	Triosephosphate isomerase	ILYGGSANGSNAVTFK	0	99	Dimethyl:2H(6)13C(2)@N-term; Deamidated(N)@8; Deamidated(N)@11; Dimethyl:2H(6)13C(2)(K)@16		-0.00315371	1671.93	836.97	1671.93	836.972	2														186.3	97.01	1001.89	198.2
P00942	Triosephosphate isomerase	TLDVVER	1	97	Dimethyl@N-term		-0.00344707	858.478	430.246	858.481	430.248	2														461.99	113.56	2417.73	261.97
P00942	Triosephosphate isomerase	TFFVGGNFK	0	82	Dimethyl:2H(6)13C(2)@N-term; Deamidated(N)@7; Dimethyl:2H(6)13C(2)(K)@9		-0.00529722	1088.64	545.329	1088.65	545.331	2														154.95	85.18	379.33	131.31
P00942	Triosephosphate isomerase	QLNAVLEEVK	2	99	Dimethyl@N-term; Dimethyl(K)@10		-0.00607291	1197.69	599.853	1197.7	599.856	2														0	0	2187.6	306.05
Q12512	Protein ZPS1	VIPGGCLGNL	0	92	Dimethyl:2H(4)@N-term; Carbamidomethyl(C)@6	cleaved S-V@N-term	-0.00569012	1030.57	516.294	1030.58	516.296	2														156.62	184.65	106.1
Q12512	Protein ZPS1	CDDIDGLCAANPNYYAGHHR	2	99	Dimethyl:2H(4)@N-term; Carbamidomethyl(C)@1; Carbamidomethyl(C)@8		0.000708802	2350.02	588.511	2350.02	588.511	4														554.42	370.8	215.39
Q12512	Protein ZPS1	CDDIDGLCAANPNYYAGHHR	0	99	Dimethyl:2H(4)@N-term; Carbamidomethyl(C)@1; Carbamidomethyl(C)@8		0.000708802	2350.02	588.511	2350.02	588.511	4														554.43	370.8	215.4
Q12512	Protein ZPS1	QSAPAETVICDYFYTSK	2	99	Dimethyl:2H(4)@N-term; Carbamidomethyl(C)@10; Dimethyl:2H(4)(K)@17		-0.00135764	2043.01	682.01	2043.01	682.011	3														404.27	116.62	81.68
Q12512	Protein ZPS1	QSAPAETVICDYFYTSK	0	99	Dimethyl:2H(4)@N-term; Carbamidomethyl(C)@10; Dimethyl:2H(4)(K)@17		-0.00135764	2043.01	682.01	2043.01	682.011	3														404.29	116.62	81.68
Q12512	Protein ZPS1	DTAEITAYGK	2	99	Dimethyl:2H(4)@N-term; Dimethyl:2H(4)(K)@10		-0.00496477	1131.62	566.818	1131.63	566.82	2														705.59	0	0
Q12512	Protein ZPS1	DTAEITAYGK	0	99	Dimethyl:2H(4)@N-term; Dimethyl:2H(4)(K)@10		-0.00496477	1131.62	566.818	1131.63	566.82	2														705.51	0	0
Q12512	Protein ZPS1	DTAEITAYGK	0	99	Dimethyl:2H(4)@N-term; Dimethyl:2H(4)(K)@10		-0.00496477	1131.62	566.818	1131.63	566.82	2														705.55	0	0
Q12512	Protein ZPS1	LLNYGVDDVYYK	2	99	Dimethyl:2H(4)@N-term; Dimethyl:2H(4)(K)@12		-0.00327594	1524.83	509.283	1524.83	509.284	3														352.08	121.49	96.61
Q12512	Protein ZPS1	LLNYGVDDVYYK	0	99	Dimethyl:2H(4)@N-term; Dimethyl:2H(4)(K)@12		-5.24e-05	1524.83	763.423	1524.83	763.423	2														670.17	250.39	127.23
Q12512	Protein ZPS1	LLNYGVDDVYYK	0	99	Dimethyl:2H(4)@N-term; Dimethyl:2H(4)(K)@12		-5.24e-05	1524.83	763.423	1524.83	763.423	2														670.24	250.39	127.5
Q12512	Protein ZPS1	MLNAAFK	2	99	Dimethyl:2H(4)@N-term; Dimethyl:2H(4)(K)@7		-0.00462813	857.524	429.769	857.528	429.772	2														759.68	460	175.55
P38248	Cell wall protein ECM33	VGQSLSIVSNDELSK	2	99	Dimethyl@N-term; Dimethyl(K)@15		-0.00344251	1630.87	544.632	1630.88	544.633	3
P38248	Cell wall protein ECM33	VNVFNINNNR	1	99	Dimethyl@N-term		-0.00726553	1230.64	616.327	1230.65	616.331	2
P38248	Cell wall protein ECM33	VIDGFNK	0	70	Dimethyl@N-term; Dimethyl(K)@7		0.00775318	847.488	424.751	847.48	424.747	2
P38248	Cell wall protein ECM33	VGQSLSIVSNDELSK	0	99	Dimethyl:2H(4)@N-term; Dimethyl:2H(4)(K)@15		0.000722258	1638.93	547.317	1638.93	547.317	3
P38248	Cell wall protein ECM33	VGQSLSIVSNDELSK	0	99	Dimethyl@N-term; Dimethyl(K)@15		-0.00241331	1630.88	816.445	1630.88	816.446	2
P38248	Cell wall protein ECM33	VGQSLSIVSNDELSK	0	99	Dimethyl@N-term; Dimethyl(K)@15		-0.00241331	1630.88	816.445	1630.88	816.446	2
P38248	Cell wall protein ECM33	VGQSLSIVSNDELSK	0	96	Dimethyl@N-term; Dimethyl(K)@15		0.000394284	1630.88	816.446	1630.88	816.446	2
P38248	Cell wall protein ECM33	VGQSLSIVSNDELSK	0	79	Dimethyl@N-term; Dimethyl(K)@15		-0.00344251	1630.87	544.632	1630.88	544.633	3
P38248	Cell wall protein ECM33	VGQSLSIVSNDELSK	0	28	Dimethyl@N-term; Dimethyl(K)@15		-0.0155968	1630.86	816.438	1630.88	816.446	2
P38248	Cell wall protein ECM33	VIDGFNK	0	37	Dimethyl:2H(4)@N-term; Dimethyl:2H(4)(K)@7		0.00329269	855.534	428.774	855.531	428.773	2
P38248	Cell wall protein ECM33	VNVFNINNNR	0	69	Dimethyl@N-term; Deamidated(N)@5; Deamidated(N)@9		0.034153	1232.65	617.332	1232.61	617.315	2
P38248	Cell wall protein ECM33	VNVFNINNNR	0	21	Dimethyl@N-term; Deamidated(N)@7		0.00181979	1231.63	616.824	1231.63	616.823	2
P48836	V-type proton ATPase subunit G	AEAGVQGELAEIK	2	99	Dimethyl:2H(4)@N-term; Dimethyl:2H(4)(K)@13		0.00780812	1377.8	689.909	1377.8	689.905	2
P48836	V-type proton ATPase subunit G	NAGGVGELEK	2	99	Dimethyl@N-term; Dimethyl(K)@10		0.000195017	1028.55	515.283	1028.55	515.282	2
P48836	V-type proton ATPase subunit G	NGIATLLQAEK	2	99	Dimethyl:2H(4)@N-term; Dimethyl:2H(4)(K)@11		0.0117114	1220.77	611.392	1220.76	611.386	2
P48836	V-type proton ATPase subunit G	KAEAGVQGELAEIKK	2	99	Dimethyl@N-term; Dimethyl(K)@1; Dimethyl(K)@14; Dimethyl(K)@15	missed K-A@1; missed K-K@14	-0.00903855	1681.99	421.505	1682	421.507	4
P48836	V-type proton ATPase subunit G	NAGGVGELEKK	2	99	Dimethyl@N-term; Dimethyl(K)@10; Dimethyl(K)@11	missed K-K@10	-0.00141249	1184.68	593.345	1184.68	593.346	2
P48836	V-type proton ATPase subunit G	TDAAKEIDSYK	1	99	Dimethyl@N-term; Dimethyl(K)@5; Dimethyl(K)@11	missed K-E@5	-0.00576844	1323.69	442.236	1323.69	442.238	3
P48836	V-type proton ATPase subunit G	EIDSYKIQK	0	79	Dimethyl@N-term; Dimethyl(K)@6; Dimethyl(K)@9	missed K-I@6	-0.00598315	1206.68	403.234	1206.69	403.236	3
P48836	V-type proton ATPase subunit G	ELAEIK	0	69	Dimethyl:2H(4)@N-term; Dimethyl:2H(4)(K)@6	cleaved G-E@N-term	0.00333016	765.512	383.763	765.509	383.762	2
P48836	V-type proton ATPase subunit G	AEAGVQGELAEIK	0	99	Dimethyl:2H(4)@N-term; Dimethyl:2H(4)(K)@13		1.00315	1378.8	690.407	1377.8	689.905	2
P48836	V-type proton ATPase subunit G	AEAGVQGELAEIK	0	99	Dimethyl:2H(4)@N-term; Dimethyl:2H(4)(K)@13		0.00475643	1377.8	689.907	1377.8	689.905	2
P48836	V-type proton ATPase subunit G	AEAGVQGELAEIK	0	99	Dimethyl:2H(4)@N-term; Dimethyl:2H(4)(K)@13		2.00754	1379.8	460.942	1377.8	460.272	3
P48836	V-type proton ATPase subunit G	ELAEIK	0	57	Dimethyl:2H(4)@N-term; Dimethyl:2H(4)(K)@6	cleaved G-E@N-term	0.00333016	765.512	383.763	765.509	383.762	2
P48836	V-type proton ATPase subunit G	NAGGVGELEK	0	99	Dimethyl@N-term; Dimethyl(K)@10		0.00849566	1028.56	515.287	1028.55	515.282	2
P48836	V-type proton ATPase subunit G	NAGGVGELEK	0	99	Dimethyl:2H(4)@N-term; Dimethyl:2H(4)(K)@10		-0.0029152	1036.6	519.306	1036.6	519.307	2
P48836	V-type proton ATPase subunit G	NAGGVGELEK	0	99	Dimethyl@N-term; Dimethyl(K)@10		0.0128901	1028.56	515.289	1028.55	515.282	2
P48836	V-type proton ATPase subunit G	NAGGVGELEK	0	99	Dimethyl@N-term; Dimethyl(K)@10		0.00446741	1028.55	515.285	1028.55	515.282	2
P48836	V-type proton ATPase subunit G	NAGGVGELEK	0	99	Dimethyl@N-term; Dimethyl(K)@10		0.00458947	1028.55	515.285	1028.55	515.282	2
P48836	V-type proton ATPase subunit G	NAGGVGELEK	0	99	Dimethyl:2H(4)@N-term; Dimethyl:2H(4)(K)@10		-0.00730965	1036.59	519.304	1036.6	519.307	2
P48836	V-type proton ATPase subunit G	NAGGVGELEK	0	99	Dimethyl@N-term; Dimethyl(K)@10		0.0106929	1028.56	515.288	1028.55	515.282	2
P48836	V-type proton ATPase subunit G	NAGGVGELEK	0	99	Dimethyl@N-term; Dimethyl(K)@10		-0.000781528	1028.55	515.282	1028.55	515.282	2
P48836	V-type proton ATPase subunit G	NAGGVGELEK	0	95	Dimethyl:2H(4)@N-term; Dimethyl:2H(4)(K)@10		-0.00511242	1036.6	519.305	1036.6	519.307	2
P48836	V-type proton ATPase subunit G	NAGGVGELEK	0	94	Dimethyl:2H(4)@N-term; Dimethyl:2H(4)(K)@10		-0.00535656	1036.6	519.305	1036.6	519.307	2
P48836	V-type proton ATPase subunit G	NAGGVGELEK	0	87	Dimethyl:2H(4)@N-term; Deamidated(N)@1; Dimethyl:2H(4)(K)@10		-0.0205167	1037.56	519.789	1037.58	519.799	2
P48836	V-type proton ATPase subunit G	NAGGVGELEKK	0	88	Dimethyl@N-term; Dimethyl(K)@10; Dimethyl(K)@11	missed K-K@10	-0.00142349	1184.68	395.899	1184.68	395.899	3
P48836	V-type proton ATPase subunit G	NGIATLLQAEK	0	99	Dimethyl:2H(4)@N-term; Deamidated(N)@1; Dimethyl:2H(4)(K)@11		0.00606641	1221.75	611.881	1221.74	611.878	2
P48836	V-type proton ATPase subunit G	NGIATLLQAEK	0	99	Dimethyl:2H(4)@N-term; Deamidated(N)@1; Dimethyl:2H(4)(K)@11		-0.0363205	1221.71	611.86	1221.74	611.878	2
P48836	V-type proton ATPase subunit G	TDAAKEIDSYK	0	98	Dimethyl@N-term; Dimethyl(K)@5; Dimethyl(K)@11	missed K-E@5	-0.000641556	1323.69	442.238	1323.69	442.238	3
Q3E792	40S ribosomal protein S25-A; 40S ribosomal protein S25-B	AQHAVILDQEK	0	99	No Dimethyl@N-term; Dimethyl:2H(6)13C(2)(K)@11		0.00486061	1286.74	429.921	1286.74	429.92	3														127.9	58.59	673.54	110.49
Q3E792	40S ribosomal protein S25-A; 40S ribosomal protein S25-B	AQHAVILDQEK	0	99	Dimethyl@N-term; Dimethyl(K)@11		0.00257297	1306.73	436.583	1306.72	436.582	3														112.36	45.08	2804.54	240.93
Q3E792	40S ribosomal protein S25-A; 40S ribosomal protein S25-B	AQHAVILDQEK	0	99	Dimethyl@N-term; Dimethyl(K)@11		0.000703769	1306.73	654.37	1306.72	654.37	2														0	0	1290.05	153.9
Q3E792	40S ribosomal protein S25-A; 40S ribosomal protein S25-B	EVPTYR	0	57	Dimethyl@N-term		0.000270854	791.418	396.716	791.418	396.716	2														190.5	59.09	1806.57	171.15
Q3E792	40S ribosomal protein S25-A; 40S ribosomal protein S25-B	EVPTYR	0	18	Dimethyl@N-term		0.000270854	791.418	396.716	791.418	396.716	2														190.5	59.11	1806.57	171.13
Q3E792	40S ribosomal protein S25-A; 40S ribosomal protein S25-B	AQHAVILDQEK	0	98	Dimethyl:2H(6)13C(2)@N-term; Dimethyl:2H(6)13C(2)(K)@11		0.00031501	1322.81	441.945	1322.81	441.945	3														122.96	47.95	3990.03	284.39
Q3E792	40S ribosomal protein S25-A; 40S ribosomal protein S25-B	EGIIKPISK	0	63	Dimethyl:2H(6)13C(2)@N-term; Dimethyl:2H(6)13C(2)(K)@5; Dimethyl:2H(6)13C(2)(K)@9		-0.000407081	1091.83	364.95	1091.83	364.95	3														41.53	35.61	2335.35	273.55
Q3E792	40S ribosomal protein S25-A; 40S ribosomal protein S25-B	EGIIKPISK	2	99	Dimethyl:2H(6)13C(2)@N-term; Dimethyl:2H(6)13C(2)(K)@5; Dimethyl:2H(6)13C(2)(K)@9		-0.000608452	1091.83	546.921	1091.83	546.922	2														0	0	1811.87	240.95
Q3E792	40S ribosomal protein S25-A; 40S ribosomal protein S25-B	EGIIKPISK	0	99	Dimethyl:2H(6)13C(2)@N-term; Dimethyl:2H(6)13C(2)(K)@5; Dimethyl:2H(6)13C(2)(K)@9		-0.000608452	1091.83	546.921	1091.83	546.922	2														0	0	1811.87	240.95
Q3E792	40S ribosomal protein S25-A; 40S ribosomal protein S25-B	EGIIKPISK	0	75	Dimethyl@N-term; Dimethyl(K)@5; Dimethyl(K)@9		-0.000666898	1067.69	356.906	1067.7	356.906	3														21.69	26.17	1195.59	198.62
Q3E792	40S ribosomal protein S25-A; 40S ribosomal protein S25-B	EGIIKPISK	0	58	Dimethyl@N-term; Dimethyl(K)@5; Dimethyl(K)@9		-0.000666898	1067.69	356.906	1067.7	356.906	3														21.69	26.17	1195.59	198.62
Q3E792	40S ribosomal protein S25-A; 40S ribosomal protein S25-B	EGIIKPISK	0	47	Dimethyl@N-term; Dimethyl(K)@5; Dimethyl(K)@9		-0.000666898	1067.69	356.906	1067.7	356.906	3														21.69	26.21	1195.59	198.62
Q3E792	40S ribosomal protein S25-A; 40S ribosomal protein S25-B	AQHAVILDQEK	2	99	Delta:H(2)C(2)@N-term; Dimethyl(K)@11		-0.0018191	1304.71	653.361	1304.71	653.362	2														576.58	143.95	0	0
Q3E792	40S ribosomal protein S25-A; 40S ribosomal protein S25-B	AQHAVILDQEKYDR	2	99	Dimethyl@N-term; Dimethyl(K)@11	missed K-Y@11	-0.00242739	1740.91	436.236	1740.92	436.236	4														0	0	227.43	77.82
Q3E792	40S ribosomal protein S25-A; 40S ribosomal protein S25-B	QAIYTR	0	24	Dimethyl:2H(6)13C(2)@N-term		-0.00128031	786.477	394.246	786.478	394.246	2														231.48	40.62	1952.35	109.5
Q3E792	40S ribosomal protein S25-A; 40S ribosomal protein S25-B	AQHAVILDQEK	0	99	Dimethyl:2H(6)13C(2)@N-term; Dimethyl:2H(6)13C(2)(K)@11		-0.00220738	1322.81	662.413	1322.81	662.414	2														0	0	1531.5	166.83
Q3E792	40S ribosomal protein S25-A; 40S ribosomal protein S25-B	EVPTYR	0	60	Dimethyl:2H(6)13C(2)@N-term		-0.00180664	799.46	400.737	799.462	400.738	2														194.28	58.94	1871.23	173.98
Q3E792	40S ribosomal protein S25-A; 40S ribosomal protein S25-B	YVSVSVLVDR	0	19	Dimethyl@N-term		-0.00298451	1163.65	582.833	1163.66	582.835	2														216.63	93.78	1499.16	273.55
Q3E792	40S ribosomal protein S25-A; 40S ribosomal protein S25-B	EGIIKPISK	0	99	Dimethyl@N-term; Dimethyl(K)@5; Dimethyl(K)@9		-0.00318722	1067.69	534.853	1067.7	534.855	2														0	0	895.1	172.05
Q3E792	40S ribosomal protein S25-A; 40S ribosomal protein S25-B	EGIIKPISK	0	98	Dimethyl@N-term; Dimethyl(K)@5; Dimethyl(K)@9		-0.00318722	1067.69	534.853	1067.7	534.855	2														0	0	895.1	172.05
Q3E792	40S ribosomal protein S25-A; 40S ribosomal protein S25-B	EGIIKPISK	0	46	Dimethyl@N-term; Dimethyl(K)@5; Dimethyl(K)@9		-0.00318722	1067.69	534.853	1067.7	534.855	2														0	0	895.1	172.05
Q3E792	40S ribosomal protein S25-A; 40S ribosomal protein S25-B	AAAALAGGK	2	99	Dimethyl:2H(6)13C(2)@N-term; Dimethyl:2H(6)13C(2)(K)@9		-0.00253626	800.567	401.291	800.569	401.292	2														7.95	6.25	137.7	23.6
P31109	Synaptobrevin homolog 1	TAELQAEIDDTVGIMR	1	98	Dimethyl:2H(6)13C(2)@N-term		0.0174107	1796.95	899.485	1796.94	899.476	2														0	0	724.3	171.13
P31109	Synaptobrevin homolog 1	ADNLAVSAQGFK	2	99	Dimethyl@N-term; Dimethyl(K)@12		0.000673471	1275.68	638.849	1275.68	638.848	2														0	0	1844.47	264.95
P06115	Catalase T	GIVLDEVTEVSVR	0	17	Dimethyl:2H(4)@N-term		-0.0117196	1446.81	724.413	1446.82	724.419	2														184.61	0	0
P06115	Catalase T	VTQYFGLLNEDLGK	1	95	Dimethyl:2H(4)@N-term; Dimethyl:2H(4)(K)@14		0.00768568	1659.94	554.321	1659.93	554.318	3														141.29	29.06	77.04
P06115	Catalase T	FSTVGGESGTPDTAR	2	99	Dimethyl:2H(4)@N-term		-0.00091155	1512.73	757.375	1512.74	757.375	2														173.1	0	0
P06115	Catalase T	AAELSGSHPDYNQAK	2	99	Dimethyl:2H(4)@N-term; Dimethyl:2H(4)(K)@15		-0.00139958	1650.84	551.289	1650.85	551.289	3														223.62	108.67	97.97
P38013	Peroxiredoxin type-2	IAISQSDADSESCK	0	98	Dimethyl@N-term; Carbamidomethyl(C)@13; Dimethyl(K)@14	cleaved Y-I@N-term	0.0556476	1565.78	522.934	1565.72	522.915	3														0	0	116.95	43.19
P38013	Peroxiredoxin type-2	IAISQSDADSESCK	0	23	Dimethyl:2H(6)13C(2)@N-term; Carbamidomethyl(C)@13; Dimethyl:2H(6)13C(2)(K)@14	cleaved Y-I@N-term	0.0337409	1581.85	528.29	1581.81	528.278	3														210.64	53.84	169.39	47.6
P38013	Peroxiredoxin type-2	FQYIAISQSDADSESCK	0	99	Dimethyl:2H(6)13C(2)@N-term; Deamidated(Q)@8; Carbamidomethyl(C)@16; Dimethyl:2H(6)13C(2)(K)@17		0.0245538	2021.01	674.678	2020.99	674.67	3														87.09	65.68	3588.18	408.06
P38013	Peroxiredoxin type-2	FQYIAISQSDADSESCK	0	99	Dimethyl@N-term; Deamidated(Q)@8; Carbamidomethyl(C)@16; Dimethyl(K)@17		0.0175721	2004.92	669.313	2004.9	669.307	3														99.52	69.9	3350.12	394.67
P38013	Peroxiredoxin type-2	ETNPGTDVTVSSVESVLAHL	0	99	Dimethyl:2H(4)@N-term; Deamidated(N)@3		0.0165973	2087.07	696.698	2087.06	696.693	3														451.48	130.03	58.97	45.55
P38013	Peroxiredoxin type-2	ETNPGTDVTVSSVESVLAHL	0	99	Dimethyl:2H(4)@N-term; Deamidated(N)@3		0.0152483	2087.07	1044.54	2087.06	1044.54	2														559.27	144.76	0	0
P38013	Peroxiredoxin type-2	WAMVVENGIVTYAAK	0	99	Dimethyl@N-term; Deamidated(N)@7; Dimethyl(K)@15		0.00909663	1707.9	570.307	1707.89	570.304	3														0	0	583	169.44
P38013	Peroxiredoxin type-2	FQYIAISQSDADSESCK	0	99	Dimethyl:2H(6)13C(2)@N-term; Carbamidomethyl(C)@16; Dimethyl:2H(6)13C(2)(K)@17		0.00624885	2020.01	674.344	2020	674.342	3														71.2	59.7	3698.61	414.19
P38013	Peroxiredoxin type-2	FQYIAISQSDADSESCK	0	99	Dimethyl:2H(6)13C(2)@N-term; Carbamidomethyl(C)@16; Dimethyl:2H(6)13C(2)(K)@17		0.00624885	2020.01	674.344	2020	674.342	3														71.2	59.76	3698.61	414.14
P38013	Peroxiredoxin type-2	FQYIAISQSDADSESCK	0	99	Dimethyl:2H(6)13C(2)@N-term; Carbamidomethyl(C)@16; Dimethyl:2H(6)13C(2)(K)@17		0.00624885	2020.01	674.344	2020	674.342	3														0	0	3698.61	414.04
P38013	Peroxiredoxin type-2	FQYIAISQSDADSESCK	2	99	Dimethyl@N-term; Carbamidomethyl(C)@16; Dimethyl(K)@17		0.00237997	2003.92	668.98	2003.91	668.979	3														0	0	3350.12	394.51
P38013	Peroxiredoxin type-2	FQYIAISQSDADSESCK	0	99	Dimethyl@N-term; Carbamidomethyl(C)@16; Dimethyl(K)@17		0.00237997	2003.92	668.98	2003.91	668.979	3														99.52	69.9	3350.12	394.67
P38013	Peroxiredoxin type-2	FQYIAISQSDADSESCK	0	89	Dimethyl@N-term; Carbamidomethyl(C)@16; Dimethyl(K)@17		0.00237997	2003.92	668.98	2003.91	668.979	3														99.52	69.96	3350.12	394.62
P38013	Peroxiredoxin type-2	FQYIAISQSDADSESCK	0	99	Delta:H(2)C(2)@N-term; Carbamidomethyl(C)@16; Dimethyl(K)@17		0.00221336	2001.9	668.308	2001.9	668.307	3														0	0	274.11	129.12
P38013	Peroxiredoxin type-2	ETNPGTDVTVSSVESVLAHL	0	99	Dimethyl@N-term		0.00167792	2082.05	695.024	2082.05	695.023	3														0	0	1889.31	206.91
P38013	Peroxiredoxin type-2	MPQTVEWSK	1	96	Dimethyl@N-term; Dimethyl(K)@9		-2.28e-05	1160.59	581.302	1160.59	581.302	2														698.66	203.87	5847.87	588.3
P38013	Peroxiredoxin type-2	MPQTVEWSK	0	50	Dimethyl@N-term; Dimethyl(K)@9		-2.28e-05	1160.59	581.302	1160.59	581.302	2														698.66	203.4	5847.87	588.48
P38013	Peroxiredoxin type-2	MPQTVEWSK	0	16	Dimethyl@N-term; Dimethyl(K)@9		-2.28e-05	1160.59	581.302	1160.59	581.302	2														707.38	210.11	5978.79	594.68
P38013	Peroxiredoxin type-2	WAMVVENGIVTYAAK	2	99	Dimethyl@N-term; Deamidated(N)@7; Dimethyl(K)@15		-0.000168774	1707.89	854.952	1707.89	854.953	2														0	0	544.72	163.88
P38013	Peroxiredoxin type-2	ETNPGTDVTVSSVESVLAHL	0	99	Dimethyl@N-term		-0.000280641	2082.05	1042.03	2082.05	1042.03	2														124.77	53.23	1513.72	185.21
P38013	Peroxiredoxin type-2	ETNPGTDVTVSSVESVLAHL	0	99	Dimethyl:2H(6)13C(2)@N-term		-0.000472047	2090.09	1046.05	2090.09	1046.05	2														124.77	53.23	1513.72	185.21
P38013	Peroxiredoxin type-2	ETNPGTDVTVSSVESVLAHL	0	99	Dimethyl:2H(6)13C(2)@N-term		-0.000472047	2090.09	1046.05	2090.09	1046.05	2														124.77	53.24	1513.72	185.27
P38013	Peroxiredoxin type-2	ETNPGTDVTVSSVESVLAHL	2	99	Delta:H(2)C(2)@N-term		-0.00104122	2080.03	694.351	2080.03	694.351	3
P38013	Peroxiredoxin type-2	FASDPGCAFTK	2	99	Dimethyl@N-term; Carbamidomethyl(C)@7; Dimethyl(K)@11		-0.000859681	1255.59	628.802	1255.59	628.803	2														296.98	127.86	11159.6	820.18
P38013	Peroxiredoxin type-2	FASDPGCAFTK	0	99	Dimethyl@N-term; Carbamidomethyl(C)@7; Dimethyl(K)@11		-0.000859681	1255.59	628.802	1255.59	628.803	2														303.24	129.14	11159.6	820.01
P38013	Peroxiredoxin type-2	FASDPGCAFTK	0	77	Dimethyl@N-term; Carbamidomethyl(C)@7; Dimethyl(K)@11		-0.000859681	1255.59	628.802	1255.59	628.803	2														312.43	136.93	11159.6	820.17
P38013	Peroxiredoxin type-2	WAMVVENGIVTYAAK	0	99	Dimethyl:2H(6)13C(2)@N-term; Deamidated(N)@7; Dimethyl:2H(6)13C(2)(K)@15		-0.00382275	1723.98	862.995	1723.98	862.997	2														0	0	573.82	168.11
P38013	Peroxiredoxin type-2	FASDPGCAFTK	0	99	Dimethyl:2H(6)13C(2)@N-term; Carbamidomethyl(C)@7; Dimethyl:2H(6)13C(2)(K)@11		-0.00371933	1271.68	636.845	1271.68	636.847	2														296.98	127.86	11159.6	820.02
P38013	Peroxiredoxin type-2	FASDPGCAFTK	0	99	Dimethyl:2H(6)13C(2)@N-term; Carbamidomethyl(C)@7; Dimethyl:2H(6)13C(2)(K)@11		-0.00371933	1271.68	636.845	1271.68	636.847	2														296.01	123.45	11159.6	820.01
P38013	Peroxiredoxin type-2	LDELVK	0	16	Dimethyl@N-term; Dimethyl(K)@6	cleaved Y-L@N-term	-0.0261193	771.448	386.731	771.474	386.744	2														0	0	0	0
P00950	Phosphoglycerate mutase 1	HLEGISDADIAK	0	99	Dimethyl:2H(6)13C(2)@N-term; Dimethyl:2H(6)13C(2)(K)@12		1.00002	1340.79	671.403	1339.79	670.903	2														138.74	87.28	7513.84	632.1
P00950	Phosphoglycerate mutase 1	SFDVPPPPIDASSPFSQK	0	92	Dimethyl@N-term; Dimethyl(K)@18		1.01149	1972.01	658.344	1971	658.007	3														103.44	70.02	3007.23	389.18
P00950	Phosphoglycerate mutase 1	SFDVPPPPIDASSPFSQK	0	99	Dimethyl@N-term; Dimethyl(K)@18		0.0212643	1971.02	986.517	1971	986.507	2														0	0	645.54	234.09
P00950	Phosphoglycerate mutase 1	RSFDVPPPPIDASSPFSQK	1	94	Dimethyl@N-term; Dimethyl(K)@19	missed R-S@1	0.0227596	2127.12	710.048	2127.1	710.041	3														0	0	485.35	147.28
P00950	Phosphoglycerate mutase 1	LWIPVNR	0	95	Dimethyl@N-term; Deamidated(N)@6		0.00973724	925.548	463.781	925.539	463.777	2														191.48	94.39	301.3	120.62
P00950	Phosphoglycerate mutase 1	SFDVPPPPIDASSPFSQK	0	99	Dimethyl@N-term; Dimethyl(K)@18		0.0133717	1971.01	658.011	1971	658.007	3														0	0	1006.41	381.99
P00950	Phosphoglycerate mutase 1	SFDVPPPPIDASSPFSQK	0	99	Dimethyl@N-term; Dimethyl(K)@18		0.00795857	1971.01	986.511	1971	986.507	2														93.52	67.23	2231.76	311.41
P00950	Phosphoglycerate mutase 1	SFDVPPPPIDASSPFSQK	0	99	Dimethyl@N-term; Dimethyl(K)@18		0.00795857	1971.01	986.511	1971	986.507	2														93.52	67.11	2231.76	311.5
P00950	Phosphoglycerate mutase 1	SFDVPPPPIDASSPFSQK	0	99	Dimethyl@N-term; Dimethyl(K)@18		0.00795857	1971.01	986.511	1971	986.507	2														93.52	67.13	2231.76	311.96
P00950	Phosphoglycerate mutase 1	SFDVPPPPIDASSPFSQK	0	99	Dimethyl:2H(6)13C(2)@N-term; Dimethyl:2H(6)13C(2)(K)@18		0.00674121	1987.09	994.554	1987.09	994.551	2														0	0	719.22	246.99
P00950	Phosphoglycerate mutase 1	SFDVPPPPIDASSPFSQK	0	99	Delta:H(2)C(2)@N-term; Dimethyl(K)@18		0.0049745	1968.99	657.337	1968.98	657.335	3														128.55	68.62	0	0
P00950	Phosphoglycerate mutase 1	TVMIAAHGNSLR	2	99	Dimethyl@N-term		0.00312977	1296.7	649.357	1296.7	649.356	2														338.56	135.92	167.39	70.86
P00950	Phosphoglycerate mutase 1	NLFTGWVDVK	0	71	Delta:H(2)C(2)@N-term; Dimethyl(K)@10		0.00286624	1231.66	616.839	1231.66	616.837	2														14	27.11	0	0
P00950	Phosphoglycerate mutase 1	SFDVPPPPIDASSPFSQK	0	99	Dimethyl:2H(6)13C(2)@N-term; Dimethyl:2H(6)13C(2)(K)@18		0.00377904	1987.09	663.371	1987.09	663.37	3														0	0	986.65	303.06
P00950	Phosphoglycerate mutase 1	TVMIAAHGNSLR	0	99	Dimethyl@N-term; Deamidated(N)@9		0.00191085	1297.68	649.849	1297.68	649.848	2														673.02	164.06	239	96.22
P00950	Phosphoglycerate mutase 1	SFDVPPPPIDASSPFSQK	0	99	Dimethyl:2H(6)13C(2)@N-term; Dimethyl:2H(6)13C(2)(K)@18		0.0028635	1987.09	663.371	1987.09	663.37	3														103.44	70.08	3007.23	389.42
P00950	Phosphoglycerate mutase 1	SFDVPPPPIDASSPFSQK	0	99	Dimethyl:2H(6)13C(2)@N-term; Dimethyl:2H(6)13C(2)(K)@18		0.0028635	1987.09	663.371	1987.09	663.37	3														103.44	69.96	3007.23	389.83
P00950	Phosphoglycerate mutase 1	SFDVPPPPIDASSPFSQK	2	99	Dimethyl@N-term; Dimethyl(K)@18		0.00275152	1971	658.008	1971	658.007	3														105.53	70.77	2884.23	381.57
P00950	Phosphoglycerate mutase 1	LNIPTGIPLVFELDENLKPSKPSYYLDPEAAAAGAAAVANQGK	2	99	Dimethyl@N-term; Dimethyl(K)@18; Dimethyl(K)@21; Dimethyl(K)@43		0.0054175	4564.45	1142.12	4564.45	1142.12	4
P00950	Phosphoglycerate mutase 1	LLPYWQDVIAK	0	99	Dimethyl:2H(6)13C(2)@N-term; Dimethyl:2H(6)13C(2)(K)@11		0.00118331	1416.9	709.456	1416.9	709.455	2														0	0	23197.2	1038.25
P00950	Phosphoglycerate mutase 1	AGELLK	0	22	Dimethyl:2H(6)13C(2)@N-term; Dimethyl:2H(6)13C(2)(K)@6		0.000255893	701.526	351.771	701.526	351.77	2														0	0	360.56	73.96
P00950	Phosphoglycerate mutase 1	KVYPDVLYTSK	0	99	Dimethyl:2H(6)13C(2)@N-term; Dimethyl:2H(6)13C(2)(K)@1; Dimethyl:2H(6)13C(2)(K)@11	missed K-V@1	0.000436256	1419.93	710.975	1419.93	710.974	2														140.76	81.99	2961	376.71
P00950	Phosphoglycerate mutase 1	HLEGISDADIAK	0	99	Dimethyl@N-term; Dimethyl(K)@12		0.000380659	1323.7	442.242	1323.7	442.242	3														92.41	101.55	604.41	182.81
P00950	Phosphoglycerate mutase 1	HLEGISDADIAK	0	99	Dimethyl:2H(6)13C(2)@N-term; Dimethyl:2H(6)13C(2)(K)@12		0.00013994	1339.79	447.605	1339.79	447.605	3														93.27	70.42	2426.02	354.1
P00950	Phosphoglycerate mutase 1	AIQTANIALEK	0	99	Delta:H(2)C(2)@N-term; Dimethyl(K)@11		3.57e-05	1224.71	613.361	1224.71	613.361	2														417.98	242.01	121.94	134.86
P00950	Phosphoglycerate mutase 1	LWIPVNR	0	74	Dimethyl:2H(6)13C(2)@N-term		1.88e-05	932.599	467.307	932.599	467.307	2														385.12	170.06	9365.33	763.49
P00950	Phosphoglycerate mutase 1	AIQTANIALEK	0	99	Dimethyl:2H(6)13C(2)@N-term; Dimethyl:2H(6)13C(2)(K)@11		-3.29e-05	1242.81	622.413	1242.81	622.413	2														0	0	8931.5	984.95
P00950	Phosphoglycerate mutase 1	TVMIAAHGN	0	99	Dimethyl:2H(6)13C(2)@N-term	cleaved N-S@C-term	-0.00025754	948.524	475.269	948.524	475.269	2														327.5	75.15	1980.7	184.07
P00950	Phosphoglycerate mutase 1	SFDVPPPPIDASSPFSQK	0	99	Dimethyl:2H(6)13C(2)@N-term; Dimethyl:2H(6)13C(2)(K)@18		-0.000705131	1987.09	994.551	1987.09	994.551	2														93.52	67.23	2231.76	311.41
P00950	Phosphoglycerate mutase 1	SFDVPPPPIDASSPFSQK	0	99	Dimethyl:2H(6)13C(2)@N-term; Dimethyl:2H(6)13C(2)(K)@18		-0.000705131	1987.09	994.551	1987.09	994.551	2														93.52	67.13	2231.76	311.69
P00950	Phosphoglycerate mutase 1	HLEGISDADIAK	2	99	Dimethyl@N-term; Dimethyl(K)@12		-0.000627592	1323.7	662.859	1323.7	662.859	2														0	0	1335.29	278
P00950	Phosphoglycerate mutase 1	HLEGISDADIAK	0	99	Dimethyl@N-term; Dimethyl(K)@12		-0.000627592	1323.7	662.859	1323.7	662.859	2														80.19	93.64	1335.29	278.07
P00950	Phosphoglycerate mutase 1	HLEGISDADIAK	0	99	Dimethyl@N-term; Dimethyl(K)@12		-0.000627592	1323.7	662.859	1323.7	662.859	2														0	0	1335.29	277.99
P00950	Phosphoglycerate mutase 1	YVDPNVLPETESLALVIDR	0	99	Dimethyl@N-term		-0.00114139	2170.15	724.391	2170.15	724.391	3														578.76	137.79	8516.36	494.15
P00950	Phosphoglycerate mutase 1	YVDPNVLPETESLALVIDR	0	99	Dimethyl@N-term		-0.00114139	2170.15	724.391	2170.15	724.391	3														578.76	137.76	8516.36	494.19
P00950	Phosphoglycerate mutase 1	LWIPVNR	1	97	Dimethyl@N-term		-0.000637295	924.554	463.284	924.555	463.285	2														403.15	173.94	8950.09	746.68
P00950	Phosphoglycerate mutase 1	LWIPVNR	0	17	Dimethyl@N-term		-0.000637295	924.554	463.284	924.555	463.285	2														403.15	173.95	8950.09	746.64
P00950	Phosphoglycerate mutase 1	LLPYWQDVIAK	2	99	Dimethyl@N-term; Dimethyl(K)@11		-0.001123	1400.81	701.41	1400.81	701.411	2														0	0	20339.9	973.69
P00950	Phosphoglycerate mutase 1	LLPYWQDVIAK	0	99	Dimethyl@N-term; Dimethyl(K)@11		-0.001123	1400.81	701.41	1400.81	701.411	2														0	0	20339.9	973.69
P00950	Phosphoglycerate mutase 1	YVDPNVLPETESLALVIDR	0	99	Dimethyl:2H(6)13C(2)@N-term		-0.00182807	2178.19	727.072	2178.2	727.073	3														514.9	130.22	8849.13	503.33
P00950	Phosphoglycerate mutase 1	YVDPNVLPETESLALVIDR	0	99	Dimethyl:2H(6)13C(2)@N-term		-0.00182807	2178.19	727.072	2178.2	727.073	3														514.9	130.19	8849.13	503.4
P00950	Phosphoglycerate mutase 1	KVYPDVLYTSK	0	97	Dimethyl:2H(6)13C(2)@N-term; Dimethyl:2H(6)13C(2)(K)@1; Dimethyl:2H(6)13C(2)(K)@11	missed K-V@1	-0.00161647	1419.93	474.318	1419.93	474.319	3														122.97	74.1	849.21	201.75
P00950	Phosphoglycerate mutase 1	HYGDLQGK	2	99	Dimethyl@N-term; Dimethyl(K)@8		-0.0011324	972.502	487.258	972.503	487.259	2														16.01	8.33	508.4	50.4
P00950	Phosphoglycerate mutase 1	KVYPDVLYTSK	2	99	Dimethyl@N-term; Dimethyl(K)@1; Dimethyl(K)@11	missed K-V@1	-0.00172832	1395.8	698.907	1395.8	698.908	2														172.32	88.11	1828.43	297.93
P00950	Phosphoglycerate mutase 1	KVYPDVLYTSK	0	99	Dimethyl@N-term; Dimethyl(K)@1; Dimethyl(K)@11	missed K-V@1	-0.00172832	1395.8	698.907	1395.8	698.908	2														172.32	88.12	1828.43	297.95
P00950	Phosphoglycerate mutase 1	YVDPNVLPETESLALVIDR	0	99	Dimethyl:2H(6)13C(2)@N-term		-0.00273987	2178.19	1090.1	2178.2	1090.11	2														370.5	103.02	5696.55	403.83
P00950	Phosphoglycerate mutase 1	VYPDVLYTSK	2	99	Dimethyl@N-term; Dimethyl(K)@10		-0.00160071	1239.67	620.844	1239.68	620.845	2														174.28	83.54	4767.3	446.73
P00950	Phosphoglycerate mutase 1	VYPDVLYTSK	0	93	Dimethyl@N-term; Dimethyl(K)@10		-0.00160071	1239.67	620.844	1239.68	620.845	2														206.82	94.79	4767.3	446.85
P00950	Phosphoglycerate mutase 1	HLEGISDADIAK	0	99	Dimethyl@N-term; Dimethyl(K)@12		-0.0018923	1323.7	442.241	1323.7	442.242	3														80.12	94.83	596.01	181.11
P00950	Phosphoglycerate mutase 1	NLFTGWVDVK	0	99	Dimethyl:2H(6)13C(2)@N-term; Dimethyl:2H(6)13C(2)(K)@10		-0.00180196	1249.76	625.889	1249.76	625.89	2														175.47	87.1	10574	709.42
P00950	Phosphoglycerate mutase 1	NLFTGWVDVK	0	99	Dimethyl:2H(6)13C(2)@N-term; Dimethyl:2H(6)13C(2)(K)@10		-0.00180196	1249.76	625.889	1249.76	625.89	2														175.47	87.11	10574	709.42
P00950	Phosphoglycerate mutase 1	NLFTGWVDVK	0	99	Dimethyl:2H(6)13C(2)@N-term; Dimethyl:2H(6)13C(2)(K)@10		-0.00180196	1249.76	625.889	1249.76	625.89	2														175.47	87.13	10574	709.42
P00950	Phosphoglycerate mutase 1	NLFTGWVDVK	2	99	Dimethyl@N-term; Dimethyl(K)@10		-0.00178499	1233.67	617.844	1233.68	617.845	2														184.93	89.36	7911.96	615.84
P00950	Phosphoglycerate mutase 1	NLFTGWVDVK	0	99	Dimethyl@N-term; Dimethyl(K)@10		-0.00178499	1233.67	617.844	1233.68	617.845	2														184.93	89.56	7911.96	615.89
P00950	Phosphoglycerate mutase 1	NLFTGWVDVK	0	99	Dimethyl@N-term; Dimethyl(K)@10		-0.00178499	1233.67	617.844	1233.68	617.845	2														184.93	89.35	7911.96	615.84
P00950	Phosphoglycerate mutase 1	VYPDVLYTSK	0	96	Dimethyl:2H(6)13C(2)@N-term; Dimethyl:2H(6)13C(2)(K)@10		-0.00186465	1255.76	628.888	1255.76	628.889	2														142.42	75.94	5879.75	494.78
P00950	Phosphoglycerate mutase 1	VYPDVLYTSK	0	95	Dimethyl:2H(6)13C(2)@N-term; Dimethyl:2H(6)13C(2)(K)@10		-0.00186465	1255.76	628.888	1255.76	628.889	2														142.42	75.94	5879.75	494.76
P00950	Phosphoglycerate mutase 1	LNIPTGIPLVF	0	83	Dimethyl:2H(6)13C(2)@N-term	cleaved F-E@C-term	-0.00210343	1218.77	610.395	1218.78	610.396	2														14.03	12.15	57.49	24.65
P00950	Phosphoglycerate mutase 1	TVMIAAHGN	2	99	Dimethyl@N-term	cleaved N-S@C-term	-0.00172439	940.478	471.246	940.48	471.247	2														327.5	75.15	1980.7	184.07
P00950	Phosphoglycerate mutase 1	AIQTANIALEK	2	99	Dimethyl@N-term; Dimethyl(K)@11		-0.00240304	1226.72	614.368	1226.72	614.369	2														0	0	7181.82	884.21
P00950	Phosphoglycerate mutase 1	DLLSGK	1	90	Dimethyl:2H(6)13C(2)@N-term; Dimethyl:2H(6)13C(2)(K)@6		-0.00139553	703.504	352.759	703.505	352.76	2														0	0	1792.89	221.41
P00950	Phosphoglycerate mutase 1	HLEGISDADIAK	0	99	Dimethyl:2H(6)13C(2)@N-term; Dimethyl:2H(6)13C(2)(K)@12		-0.00280068	1339.79	670.902	1339.79	670.903	2														138.74	87.28	7513.84	632.04
P00950	Phosphoglycerate mutase 1	YVDPNVLPETESLALVIDR	2	99	Dimethyl@N-term		-0.00456082	2170.15	1086.08	2170.15	1086.08	2														370.5	103.02	5696.55	403.83
P00950	Phosphoglycerate mutase 1	YVDPNVLPETESLALVIDR	0	99	Dimethyl@N-term		-0.00456082	2170.15	1086.08	2170.15	1086.08	2														370.5	103.03	5696.55	403.83
P00950	Phosphoglycerate mutase 1	HYGDLQGK	0	99	Dimethyl:2H(6)13C(2)@N-term; Dimethyl:2H(6)13C(2)(K)@8		-0.00393427	988.588	495.301	988.592	495.303	2														12.16	7.36	998.64	63.4
P00950	Phosphoglycerate mutase 1	SFDVPPPPIDASSPFSQK	0	99	Dimethyl:2H(6)13C(2)@N-term; Dimethyl:2H(6)13C(2)(K)@18		-1.00056	1986.09	663.036	1987.09	663.37	3														92.33	68.29	2971.63	386.48
P00950	Phosphoglycerate mutase 1	HLEGISDADIAK	0	99	Dimethyl:2H(6)13C(2)@N-term; Dimethyl:2H(6)13C(2)(K)@12		-1.00598	1338.79	670.4	1339.79	670.903	2														156.93	92.63	6826.97	603.13
P00950	Phosphoglycerate mutase 1	SFDVPPPPIDASSPFSQK	0	64	Dimethyl@N-term; Dimethyl(K)@18		-1.96821	1969.03	657.351	1971	658.007	3														0	0	332.78	131.05
Q12335	Protoplast secreted protein 2	ALGGAPKPDYPIATQDTLTEYDAFLFGIPTR	2	99	Dimethyl:2H(4)@N-term; Dimethyl:2H(4)(K)@7		-0.00593175	3401.79	851.456	3401.8	851.457	4
Q12335	Protoplast secreted protein 2	FGNFPAQWK	2	99	Dimethyl:2H(4)@N-term; Dimethyl:2H(4)(K)@9		-0.00420377	1157.64	579.829	1157.65	579.831	2
Q12335	Protoplast secreted protein 2	GIEAAGGSADIYQVEETLSPEVVK	2	99	Dimethyl@N-term; Dimethyl(K)@24		0.00761853	2517.29	840.105	2517.28	840.102	3
Q12335	Protoplast secreted protein 2	KGIEAAGGSADIYQVEETLSPEVVK	2	99	Dimethyl:2H(4)@N-term; Dimethyl:2H(4)(K)@1; Dimethyl:2H(4)(K)@25	missed K-G@1	0.0067562	2685.49	672.381	2685.49	672.379	4
Q12335	Protoplast secreted protein 2	NVFAELTNMDEVHGGSPWGAGTIAGSDGSR	2	99	Dimethyl:2H(4)@N-term		0.00507657	3063.43	766.866	3063.43	766.865	4
Q12335	Protoplast secreted protein 2	SPSALELQVHEIQGK	2	99	Dimethyl@N-term; Dimethyl(K)@15		-0.00679814	1690.92	564.647	1690.93	564.649	3
Q12335	Protoplast secreted protein 2	TFYETVAK	2	99	Dimethyl:2H(4)@N-term; Dimethyl:2H(4)(K)@8		-0.00222877	1021.59	511.803	1021.59	511.804	2
Q12335	Protoplast secreted protein 2	VAGCFVSTGTGGGNEATIMNSLSTLAHHGIIFVPLGYK	2	99	Dimethyl:2H(4)@N-term; Carbamidomethyl(C)@4; Dimethyl:2H(4)(K)@38		-0.053877	3939.99	789.006	3940.05	789.017	5
Q12335	Protoplast secreted protein 2	TFYETVAKF	1	97	Dimethyl@N-term; Dimethyl(K)@8	missed K-F@8	0.00212044	1160.61	581.314	1160.61	581.313	2
Q12335	Protoplast secreted protein 2	ALGGAPKPDYPIATQDTLTEYDAFLFGIPTR	0	99	Dimethyl:2H(4)@N-term; Dimethyl:2H(4)(K)@7		0.00716347	3401.81	1134.94	3401.8	1134.94	3
Q12335	Protoplast secreted protein 2	FGNFPAQWK	0	98	Dimethyl:2H(4)@N-term; Dimethyl:2H(4)(K)@9		-0.00456997	1157.64	579.829	1157.65	579.831	2
Q12335	Protoplast secreted protein 2	FGNFPAQWK	0	96	Dimethyl:2H(4)@N-term; Dimethyl:2H(4)(K)@9		0.00141133	1157.65	579.832	1157.65	579.831	2
Q12335	Protoplast secreted protein 2	FGNFPAQWK	0	86	Dimethyl:2H(4)@N-term; Deamidated(Q)@7; Dimethyl:2H(4)(K)@9		0.0143212	1158.65	580.33	1158.63	580.323	2
Q12335	Protoplast secreted protein 2	FGNFPAQWK	0	62	Dimethyl:2H(4)@N-term; Deamidated(Q)@7; Dimethyl:2H(4)(K)@9		0.013955	1158.65	580.33	1158.63	580.323	2
Q12335	Protoplast secreted protein 2	FGNFPAQWK	0	56	Dimethyl:2H(4)@N-term; Deamidated(Q)@7; Dimethyl:2H(4)(K)@9		-0.00606406	1158.63	580.32	1158.63	580.323	2
Q12335	Protoplast secreted protein 2	GIEAAGGSADIYQVEETLSPEVVK	0	99	Dimethyl:2H(4)@N-term; Dimethyl:2H(4)(K)@24		-0.00743262	2525.33	632.339	2525.34	632.341	4
Q12335	Protoplast secreted protein 2	GIEAAGGSADIYQVEETLSPEVVK	0	99	Dimethyl:2H(4)@N-term; Dimethyl:2H(4)(K)@24		0.00881416	2525.34	842.789	2525.34	842.786	3
Q12335	Protoplast secreted protein 2	GIEAAGGSADIYQVEETLSPEVVK	0	99	Dimethyl@N-term; Dimethyl(K)@24		0.012515	2517.3	630.332	2517.28	630.329	4
Q12335	Protoplast secreted protein 2	GIEAAGGSADIYQVEETLSPEVVK	0	99	Dimethyl:2H(4)@N-term; Dimethyl:2H(4)(K)@24		-0.00162248	2525.33	842.785	2525.34	842.786	3
Q12335	Protoplast secreted protein 2	GIEAAGGSADIYQVEETLSPEVVK	0	99	Dimethyl:2H(4)@N-term; Dimethyl:2H(4)(K)@24		-0.0160873	2525.32	842.78	2525.34	842.786	3
Q12335	Protoplast secreted protein 2	GIEAAGGSADIYQVEETLSPEVVK	0	99	Dimethyl:2H(4)@N-term; Dimethyl:2H(4)(K)@24		-0.0235944	2525.31	842.778	2525.34	842.786	3
Q12335	Protoplast secreted protein 2	GIEAAGGSADIYQVEETLSPEVVK	0	99	Dimethyl@N-term; Dimethyl(K)@24		0.00670304	2517.29	840.105	2517.28	840.102	3
Q12335	Protoplast secreted protein 2	NVFAELTNMDEVHGGSPWGAGTIAGSDGSR	0	99	Dimethyl:2H(4)@N-term		0.0228504	3063.45	1022.16	3063.43	1022.15	3
Q12335	Protoplast secreted protein 2	NVFAELTNMDEVHGGSPWGAGTIAGSDGSR	0	99	Dimethyl:2H(4)@N-term; Deamidated(N)@8		0.0480742	3064.46	1022.49	3064.41	1022.48	3
Q12335	Protoplast secreted protein 2	NVFAELTNMDEVHGGSPWGAGTIAGSDGSR	0	99	Dimethyl:2H(4)@N-term		0.0105828	3063.44	1022.15	3063.43	1022.15	3
Q12335	Protoplast secreted protein 2	NVFAELTNMDEVHGGSPWGAGTIAGSDGSR	0	99	Dimethyl:2H(4)@N-term		0.0102034	3063.44	766.867	3063.43	766.865	4
Q12335	Protoplast secreted protein 2	NVFAELTNMDEVHGGSPWGAGTIAGSDGSR	0	97	Dimethyl:2H(4)@N-term; Deamidated(N)@8		0.0744924	3064.49	767.129	3064.41	767.111	4
Q12335	Protoplast secreted protein 2	NVFAELTNMDEVHGGSPWGAGTIAGSDGSR	0	96	Dimethyl:2H(4)@N-term; Deamidated(N)@8		0.0683982	3064.48	1022.5	3064.41	1022.48	3
Q12335	Protoplast secreted protein 2	SPSALELQVHEIQGK	0	99	Dimethyl:2H(4)@N-term; Dimethyl:2H(4)(K)@15		0.0022068	1698.98	567.333	1698.98	567.332	3
Q12335	Protoplast secreted protein 2	SPSALELQVHEIQGK	0	99	Dimethyl:2H(4)@N-term; Dimethyl:2H(4)(K)@15		0.0022068	1698.98	567.333	1698.98	567.332	3
Q12335	Protoplast secreted protein 2	SPSALELQVHEIQGK	0	99	Dimethyl:2H(4)@N-term; Dimethyl:2H(4)(K)@15		0.00424673	1698.98	850.497	1698.98	850.495	2
Q12335	Protoplast secreted protein 2	SPSALELQVHEIQGK	0	99	Dimethyl@N-term; Dimethyl(K)@15		-0.00679814	1690.92	564.647	1690.93	564.649	3
Q12335	Protoplast secreted protein 2	SPSALELQVHEIQGK	0	99	Dimethyl@N-term; Dimethyl(K)@15		2.00586	1692.93	565.318	1690.93	564.649	3
Q12335	Protoplast secreted protein 2	SPSALELQVHEIQGK	0	99	Dimethyl@N-term; Dimethyl(K)@15		-0.0089341	1690.92	846.466	1690.93	846.47	2
Q12335	Protoplast secreted protein 2	SPSALELQVHEIQGK	0	67	Dimethyl@N-term; Dimethyl(K)@15		-0.00679814	1690.92	564.647	1690.93	564.649	3
Q12335	Protoplast secreted protein 2	SPSALELQVHEIQGK	0	38	Dimethyl:2H(4)@N-term; Dimethyl:2H(4)(K)@15		0.00424673	1698.98	850.497	1698.98	850.495	2
Q12335	Protoplast secreted protein 2	TFYETVAK	0	93	Dimethyl:2H(4)@N-term; Dimethyl:2H(4)(K)@8		-0.00222877	1021.59	511.803	1021.59	511.804	2
Q12335	Protoplast secreted protein 2	TFYETVAKF	0	95	Dimethyl@N-term; Dimethyl(K)@8	missed K-F@8	0.00175424	1160.61	581.314	1160.61	581.313	2
Q12335	Protoplast secreted protein 2	TFYETVAKF	0	65	Dimethyl@N-term; Dimethyl(K)@8	missed K-F@8	0.00212044	1160.61	581.314	1160.61	581.313	2
Q12285	Ubiquitin-like protein MDY2	TVPWDDIEALLK	0	21	Dimethyl:2H(4)@N-term; Dimethyl:2H(4)(K)@12	cleaved L-T@N-term	-0.000629728	1462.85	732.433	1462.85	732.433	2														75.43	253.78	107.61
Q12285	Ubiquitin-like protein MDY2	GWSLAK	0	29	Dimethyl:2H(4)@N-term; Dimethyl:2H(4)(K)@6		0.00298051	724.475	363.245	724.472	363.243	2														276.64	0	0
Q12285	Ubiquitin-like protein MDY2	DVTNLGVPLPTLK	0	31	Dimethyl:2H(4)@N-term; Deamidated(N)@4; Dimethyl:2H(4)(K)@13		0.0204228	1430.9	716.459	1430.88	716.449	2														306.04	23.92	35.02
Q12285	Ubiquitin-like protein MDY2	STSASGPEHEFVSK	0	34	Delta:H(2)C(2)@N-term; Oxidation(P)@7; Dimethyl:2H(4)(K)@14	cleaved M-S@N-term	0.000809732	1535.74	768.878	1535.74	768.878	2														530.37	144.68	119.41
Q12285	Ubiquitin-like protein MDY2	VTPANSTITVM	0	77	Dimethyl:2H(4)@N-term	cleaved M-I@C-term	-0.00109743	1164.64	583.325	1164.64	583.325	2														347.72	286.38	117.36
Q12285	Ubiquitin-like protein MDY2	FSIEHDFSPSDTILQIK	0	80	Dimethyl:2H(4)@N-term; Dehydrated(S)@2; Oxidation(H)@5; Dimethyl:2H(4)(K)@17		0.0122782	2038.1	680.374	2038.09	680.369	3														109.42	268.81	99.65
Q12285	Ubiquitin-like protein MDY2	NNFENDQAAVR	0	97	Dimethyl:2H(4)@N-term; Deamidated(N)@5		0.0199005	1309.64	655.827	1309.62	655.817	2														434.17	0	0
Q12285	Ubiquitin-like protein MDY2	STSASGPEHEFVSK	2	99	Delta:H(2)C(2)@N-term; Oxidation(P)@7; Dimethyl:2H(4)(K)@14	cleaved M-S@N-term	0.000809732	1535.74	768.878	1535.74	768.878	2														530.35	144.68	119.41
Q12285	Ubiquitin-like protein MDY2	NNFENDQAAVR	2	99	Dimethyl:2H(4)@N-term		-0.000849893	1308.64	655.325	1308.64	655.325	2														434.14	289.6	242.27
Q12285	Ubiquitin-like protein MDY2	FLTLATLTEPK	2	99	Dimethyl:2H(4)@N-term; Dimethyl:2H(4)(K)@11		-0.000202186	1296.81	649.414	1296.81	649.414	2														524.48	123.93	92.74
Q12285	Ubiquitin-like protein MDY2	FLTLATLTEPK	0	99	Dimethyl:2H(4)@N-term; Dimethyl:2H(4)(K)@11		-0.000202186	1296.81	649.414	1296.81	649.414	2														502.83	135.28	96.88
Q12285	Ubiquitin-like protein MDY2	FLTLATLTEPK	0	99	Dimethyl:2H(4)@N-term; Dimethyl:2H(4)(K)@11		0.999313	1297.81	649.914	1296.81	649.414	2														524.48	123.93	92.74
Q12285	Ubiquitin-like protein MDY2	FLTLATLTEPK	0	99	Dimethyl:2H(4)@N-term; Dimethyl:2H(4)(K)@11		-0.000202186	1296.81	649.414	1296.81	649.414	2														524.46	123.93	92.77
Q12285	Ubiquitin-like protein MDY2	VLHDNLFLSDLK	2	99	Dimethyl:2H(4)@N-term; Dimethyl:2H(4)(K)@12		-0.00123429	1476.88	493.3	1476.88	493.3	3														346.13	64.77	63.16
Q12285	Ubiquitin-like protein MDY2	VLHDNLFLSDLK	0	99	Dimethyl:2H(4)@N-term; Dimethyl:2H(4)(K)@12		-0.00123429	1476.88	493.3	1476.88	493.3	3														346.35	0	0
Q12285	Ubiquitin-like protein MDY2	DVTNLGVPLPTLK	2	99	Dimethyl:2H(4)@N-term; Dimethyl:2H(4)(K)@13		0.00321452	1429.9	715.959	1429.9	715.957	2														306.03	85.78	71.16
Q12285	Ubiquitin-like protein MDY2	DVTNLGVPLPTLK	0	99	Dimethyl:2H(4)@N-term; Dimethyl:2H(4)(K)@13		0.00321452	1429.9	715.959	1429.9	715.957	2														306.04	98.63	69.26
Q12285	Ubiquitin-like protein MDY2	DVTNLGVPLPTLK	0	99	Dimethyl:2H(4)@N-term; Dimethyl:2H(4)(K)@13		0.00340038	1429.9	477.642	1429.9	477.64	3														227.01	0	0
Q12285	Ubiquitin-like protein MDY2	FSIEHDFSPSDTILQIK	2	99	Dimethyl:2H(4)@N-term; Dimethyl:2H(4)(K)@17		0.00133642	2040.1	681.042	2040.1	681.041	3														296.55	173.72	103.4
Q12285	Ubiquitin-like protein MDY2	FSIEHDFSPSDTILQIK	0	99	Dimethyl:2H(4)@N-term; Dimethyl:2H(4)(K)@17		0.00133642	2040.1	681.042	2040.1	681.041	3														296.56	173.72	103.36
Q12285	Ubiquitin-like protein MDY2	LHQDQQGQDNAAVHLTLK	2	99	Dimethyl:2H(4)@N-term; Dimethyl:2H(4)(K)@18		0.00240233	2079.13	520.791	2079.13	520.79	4														299.69	0	0
Q12285	Ubiquitin-like protein MDY2	STNSPAPAPPQELTVPWDDIEALLK	2	99	Dimethyl:2H(4)@N-term; Dimethyl:2H(4)(K)@25		-0.00153417	2752.48	918.499	2752.48	918.5	3														72.55	0	0
Q02642	Nascent polypeptide-associated complex subunit beta-1	LHAVTIDNVAEANFFK	2	99	Dimethyl:2H(6)13C(2)@N-term; Dimethyl:2H(6)13C(2)(K)@16		0.0025986	1860.07	621.032	1860.07	621.031	3														0	0	675.57	184.41
Q02642	Nascent polypeptide-associated complex subunit beta-1	LHAVTIDNVAEANFFKDDGK	2	99	Dimethyl@N-term; Dimethyl(K)@16; Dimethyl(K)@20	missed K-D@16	0.0029422	2287.19	572.804	2287.18	572.803	4														0	0	833.81	197.88
Q02642	Nascent polypeptide-associated complex subunit beta-1	KDEAIPELVEGQTFDADVE	0	99	Dimethyl:2H(6)13C(2)@N-term; Dimethyl:2H(6)13C(2)(K)@1	missed K-D@1	0.000847281	2176.14	1089.08	2176.14	1089.08	2														0	0	1474.35	267.92
Q02642	Nascent polypeptide-associated complex subunit beta-1	LHAVTIDNVAEANFFKDDGK	0	25	Dimethyl@N-term; Dimethyl(K)@16; Dimethyl(K)@20	missed K-D@16	0.000444222	2287.19	763.402	2287.18	763.402	3														478.73	154.73	676.75	178.17
Q02642	Nascent polypeptide-associated complex subunit beta-1	LQSQLAK	0	45	Dimethyl@N-term; Dimethyl(K)@7		-0.000345455	842.522	422.268	842.523	422.269	2														111.45	33.54	1220.28	106.65
Q02642	Nascent polypeptide-associated complex subunit beta-1	KDEAIPELVEGQTFDADVE	2	99	Dimethyl@N-term; Dimethyl(K)@1	missed K-D@1	-0.00111189	2160.05	1081.03	2160.05	1081.03	2														0	0	1474.35	267.92
Q02642	Nascent polypeptide-associated complex subunit beta-1	LHAVTIDNVAEANFFK	0	66	Dimethyl:2H(6)13C(2)@N-term; Dimethyl:2H(6)13C(2)(K)@16		-0.0030777	1860.07	621.03	1860.07	621.031	3														0	0	308.35	118.36
Q02642	Nascent polypeptide-associated complex subunit beta-1	LQSQLAK	1	92	Dimethyl:2H(6)13C(2)@N-term; Dimethyl:2H(6)13C(2)(K)@7		-0.00260491	858.609	430.312	858.611	430.313	2														189.33	41.77	1253.34	107.91
P53630	Dethiobiotin synthetase	SQQQEQQPIVFVTGTDTDVGK	2	99	Dimethyl@N-term; Deamidated(Q)@3; Deamidated(Q)@7; Dimethyl(K)@21		0.0465335	2362.2	788.408	2362.15	788.392	3														0	0	933.37	195.77
P53630	Dethiobiotin synthetase	SHLFGVILNGEPNEGNVQALK	0	97	Dimethyl@N-term; Deamidated(N)@9; Deamidated(N)@13; Dimethyl(K)@21		0.0164294	2293.21	765.411	2293.2	765.406	3														157.94	89.77	963.19	216.73
P53630	Dethiobiotin synthetase	TFVSTLLVHK	2	99	Dimethyl@N-term; Dimethyl(K)@10		0.00470803	1199.73	400.918	1199.73	400.917	3														0	0	80.99	82.11
P53630	Dethiobiotin synthetase	TFVSTLLVHK	0	44	Dimethyl@N-term; Dimethyl(K)@10		0.00470803	1199.73	400.918	1199.73	400.917	3														0	0	80.99	82.11
P53630	Dethiobiotin synthetase	AAYWKPVQTGIESDQGDSETLK	0	99	Dimethyl:2H(6)13C(2)@N-term; Dimethyl:2H(6)13C(2)(K)@5; Dimethyl:2H(6)13C(2)(K)@22		0.00696768	2530.4	844.474	2530.39	844.471	3														0	0	1391.08	245.9
P53630	Dethiobiotin synthetase	AAYWKPVQTGIESDQGDSETLK	2	99	Dimethyl@N-term; Dimethyl(K)@5; Dimethyl(K)@22		0.00606782	2506.27	836.429	2506.26	836.427	3														0	0	1391.08	245.9
P53630	Dethiobiotin synthetase	SHLFGVILNGEPNEGNVQALK	0	99	Dimethyl:2H(6)13C(2)@N-term; Deamidated(N)@9; Dimethyl:2H(6)13C(2)(K)@21		0.00446161	2308.3	770.442	2308.3	770.441	3														145.02	84.16	963.19	216.74
P53630	Dethiobiotin synthetase	SQQQEQQPIVFVTGTDTDVGK	0	99	Dimethyl@N-term; Dimethyl(K)@21		0.00432655	2360.19	1181.1	2360.19	1181.1	2														0	0	547.66	150.16
P53630	Dethiobiotin synthetase	SQQQEQQPIVFVTGTDTDVGK	0	99	Dimethyl@N-term; Dimethyl(K)@21		0.00339377	2360.19	787.737	2360.19	787.736	3														0	0	1932.25	281.64
P53630	Dethiobiotin synthetase	IAASTWQPPIFTPTYALQK	0	89	Dimethyl:2H(6)13C(2)@N-term; Dimethyl:2H(6)13C(2)(K)@19	cleaved K-P@C-term	0.00292421	2204.28	735.769	2204.28	735.768	3														0	0	650.25	163.46
P53630	Dethiobiotin synthetase	SQQQEQQPIVFVTGTDTDVGK	0	99	Dimethyl:2H(6)13C(2)@N-term; Dimethyl:2H(6)13C(2)(K)@21		0.00310462	2376.28	1189.15	2376.27	1189.14	2														0	0	615.58	158.96
P53630	Dethiobiotin synthetase	KLEITTDLIK	0	86	Dimethyl:2H(6)13C(2)@N-term; Dimethyl:2H(6)13C(2)(K)@1; Dimethyl:2H(6)13C(2)(K)@10	missed K-L@1	-0.000149129	1280.93	641.472	1280.93	641.472	2														31.57	43.85	2227.63	309.42
P53630	Dethiobiotin synthetase	KLEITTDLIK	2	99	Dimethyl@N-term; Dimethyl(K)@1; Dimethyl(K)@10	missed K-L@1	-0.00170721	1256.79	629.404	1256.8	629.405	2														0	0	1711.19	272.16
P53630	Dethiobiotin synthetase	SHLFGVILNGEPNEGNVQALK	2	99	Dimethyl@N-term; Deamidated(N)@13; Dimethyl(K)@21		-0.0126846	2292.2	765.073	2292.21	765.078	3														130.55	80.1	876.43	206.97
P53630	Dethiobiotin synthetase	PLSPLQAMEYEPNVDIR	0	73	Dimethyl:2H(6)13C(2)@N-term; Dehydrated(S)@3	cleaved K-P@N-term	-0.0285431	1989.01	664.012	1989.04	664.021	3														562.92	160.38	1269.26	240.76
P53630	Dethiobiotin synthetase	SQQQEQQPIVFVTGTDTDVGK	0	90	Dimethyl:2H(6)13C(2)@N-term; Dimethyl:2H(6)13C(2)(K)@21		-1.00052	2375.27	1188.64	2376.27	1189.14	2														0	0	549.57	150.43
P53630	Dethiobiotin synthetase	SQQQEQQPIVFVTGTDTDVGK	0	99	Dimethyl:2H(6)13C(2)@N-term; Dimethyl:2H(6)13C(2)(K)@21		-2.01276	2374.26	792.428	2376.27	793.099	3														0	0	1943.73	282.48
P48589	40S ribosomal protein S12	LVEGLANDPENK	0	41	Dimethyl:2H(4)@N-term; Dimethyl:2H(4)(K)@12		1.01501	1362.78	455.267	1361.76	454.929	3														0	0	0
P48589	40S ribosomal protein S12	TALVHDGLAR	0	98	Dimethyl:2H(4)@N-term		0.00374852	1083.64	362.22	1083.63	362.219	3														127.75	86.74	54.54
P48589	40S ribosomal protein S12	NWGAETDELSMIMEHFSQQ	2	99	Dimethyl:2H(4)@N-term		-0.00415935	2284	1143.01	2284.01	1143.01	2														63.62	0	0
P48589	40S ribosomal protein S12	TALVHDGLAR	2	99	Dimethyl:2H(4)@N-term		0.00109348	1083.63	362.219	1083.63	362.219	3														471.99	402.3	129.3
P48589	40S ribosomal protein S12	TALVHDGLAR	0	99	Dimethyl:2H(4)@N-term		0.00109348	1083.63	362.219	1083.63	362.219	3														472.82	391.25	128.65
P48589	40S ribosomal protein S12	TALVHDGLAR	0	99	Dimethyl:2H(4)@N-term		0.00374852	1083.64	362.22	1083.63	362.219	3														127.69	86.74	54.54
P48589	40S ribosomal protein S12	QLGEWAGLGK	2	99	Dimethyl:2H(4)@N-term; Dimethyl:2H(4)(K)@10		-0.000949942	1121.67	561.841	1121.67	561.841	2														666.73	0	0
P48589	40S ribosomal protein S12	QLGEWAGLGK	0	99	Dimethyl:2H(4)@N-term; Dimethyl:2H(4)(K)@10		-0.000949942	1121.67	561.841	1121.67	561.841	2														666.77	0	0
P48589	40S ribosomal protein S12	QLGEWAGLGK	0	99	Dimethyl:2H(4)@N-term; Dimethyl:2H(4)(K)@10		-0.000949942	1121.67	561.841	1121.67	561.841	2														666.73	0	0
P48589	40S ribosomal protein S12	LVEGLANDPENK	2	99	Dimethyl:2H(4)@N-term; Dimethyl:2H(4)(K)@12		0.00150009	1361.77	681.89	1361.76	681.889	2														426.77	0	0
P48589	40S ribosomal protein S12	LVEGLANDPENK	0	99	Dimethyl:2H(4)@N-term; Dimethyl:2H(4)(K)@12		0.00150009	1361.77	681.89	1361.76	681.889	2														426.78	0	0
P48589	40S ribosomal protein S12	LVEGLANDPENKVPLIK	2	99	Dimethyl:2H(4)@N-term; Dimethyl:2H(4)(K)@12; Dimethyl:2H(4)(K)@17	missed K-V@12	-0.00273707	1944.2	649.075	1944.2	649.076	3														462.83	0	0
P48589	40S ribosomal protein S12	LVEGLANDPENKVPLIK	0	99	Dimethyl:2H(4)@N-term; Dimethyl:2H(4)(K)@12; Dimethyl:2H(4)(K)@17	missed K-V@12	-0.00273707	1944.2	649.075	1944.2	649.076	3														462.82	0	0
P48589	40S ribosomal protein S12	TALVHDGLAR	0	99	Dimethyl@N-term		0.0046392	1079.61	360.878	1079.61	360.877	3														472.84	373.97	124.81
Q03973	High mobility group protein 1	AANQTASSIVDFYNAIGDDEEEKIEAF	0	51	Dimethyl:2H(4)@N-term; Dimethyl:2H(4)(K)@23	cleaved F-T@C-term; missed K-I@23	0.0082052	3010.46	1004.5	3010.45	1004.49	3														142.86	0	0
Q03973	High mobility group protein 1	KNGTLPPASLENGPTHAPVPIPF	0	54	Dimethyl:2H(4)@N-term; Dimethyl:2H(4)(K)@1; Deamidated(N)@2; Deamidated(N)@12	cleaved F-S@C-term; missed K-N@1	-0.000305003	2419.32	807.448	2419.32	807.449	3														268.14	264.77	144.32
Q03973	High mobility group protein 1	AGLPPLSSTEITQEISK	0	99	Dimethyl:2H(4)@N-term; Dimethyl:2H(4)(K)@17		1.97915	1836.03	613.018	1834.05	612.359	3														667.71	172.74	96.71
Q03973	High mobility group protein 1	QAYNVELENYQR	2	99	Dimethyl:2H(4)@N-term		-0.000179653	1557.77	779.893	1557.77	779.894	2														459.59	443.15	171.64
Q03973	High mobility group protein 1	QAYNVELENYQR	0	99	Dimethyl:2H(4)@N-term		-0.000179653	1557.77	779.893	1557.77	779.894	2														459.36	443.15	171.66
Q03973	High mobility group protein 1	KNGTLPPASLENGPTHAPVPIPF	2	99	Dimethyl:2H(4)@N-term; Dimethyl:2H(4)(K)@1; Deamidated(N)@2; Deamidated(N)@12	cleaved F-S@C-term; missed K-N@1	0.0028078	2419.33	807.449	2419.32	807.449	3														373.94	161.92	104.82
Q03973	High mobility group protein 1	KNGTLPPASLENGPTHAPVPIPF	0	99	Dimethyl:2H(4)@N-term; Dimethyl:2H(4)(K)@1; Deamidated(N)@2; Deamidated(N)@12	cleaved F-S@C-term; missed K-N@1	0.00115985	2419.33	807.449	2419.32	807.449	3														192.8	0	0
Q03973	High mobility group protein 1	KNGTLPPASLENGPTHAPVPIPF	0	99	Dimethyl:2H(4)@N-term; Dimethyl:2H(4)(K)@1; Deamidated(N)@2; Deamidated(N)@12	cleaved F-S@C-term; missed K-N@1	-0.000305003	2419.32	807.448	2419.32	807.449	3														257.61	0	0
Q03973	High mobility group protein 1	DSLVSSLFELSK	2	99	Dimethyl:2H(4)@N-term; Dimethyl:2H(4)(K)@12		-0.0001796	1387.8	694.91	1387.81	694.91	2														369.4	242.76	117.36
Q03973	High mobility group protein 1	SLQHAAEPPVEK	2	99	Dimethyl:2H(4)@N-term; Dimethyl:2H(4)(K)@12	cleaved F-S@N-term	-0.000633791	1368.78	457.269	1368.79	457.269	3														456.59	301.37	93.66
Q03973	High mobility group protein 1	DSLVSSLFELSK	0	99	Dimethyl:2H(4)@N-term; Dimethyl:2H(4)(K)@12		-0.0001796	1387.8	694.91	1387.81	694.91	2														369.41	242.76	117.36
Q03973	High mobility group protein 1	SLQHAAEPPVEK	0	99	Dimethyl:2H(4)@N-term; Dimethyl:2H(4)(K)@12	cleaved F-S@N-term	-0.000359132	1368.78	457.269	1368.79	457.269	3														488.99	433.13	111.43
Q03973	High mobility group protein 1	SLQHAAEPPVEK	0	99	Dimethyl:2H(4)@N-term; Dimethyl:2H(4)(K)@12	cleaved F-S@N-term	-0.00122243	1368.78	685.399	1368.79	685.4	2														155.2	0	0
Q03973	High mobility group protein 1	AGLPPLSSTEITQEISK	2	99	Dimethyl:2H(4)@N-term; Dimethyl:2H(4)(K)@17		-0.0038839	1834.05	612.357	1834.05	612.359	3														704.69	279.66	121.88
Q03973	High mobility group protein 1	AGLPPLSSTEITQEISK	0	99	Dimethyl:2H(4)@N-term; Dimethyl:2H(4)(K)@17		-0.00258587	1834.05	918.033	1834.05	918.034	2														456.49	145.02	108.19
Q03973	High mobility group protein 1	AGLPPLSSTEITQEISK	0	99	Dimethyl:2H(4)@N-term; Dimethyl:2H(4)(K)@17		-0.00258587	1834.05	918.033	1834.05	918.034	2														456.49	145.02	108.19
Q03973	High mobility group protein 1	SLQHAAEPPVEK	0	99	Dimethyl:2H(6)13C(2)@N-term; Dimethyl:2H(6)13C(2)(K)@12	cleaved F-S@N-term	-0.0021674	1376.82	459.948	1376.82	459.949	3														488.98	433.13	111.43
Q03973	High mobility group protein 1	SLQHAAEPPVEK	0	99	Dimethyl@N-term; Dimethyl(K)@12	cleaved F-S@N-term	0.00260825	1360.74	454.587	1360.74	454.586	3														488.98	433.13	111.43
P23724	Proteasome subunit beta type-6	NIQHLLYGK	0	31	Dimethyl@N-term; Dimethyl(K)@9		0.00677126	1140.67	571.343	1140.67	571.34	2														0	0	3325.08	385.86
P23724	Proteasome subunit beta type-6	GAVYSFDPVGSYER	0	93	Dimethyl:2H(6)13C(2)@N-term		0.00711655	1581.79	791.904	1581.79	791.9	2														0	0	727.28	209.72
P23724	Proteasome subunit beta type-6	AGGAAASLIMPFLDNQVNFK	1	98	Dimethyl@N-term; Dimethyl(K)@20		0.00170354	2119.12	1060.57	2119.11	1060.56	2														0	0	83.45	36.55
P23724	Proteasome subunit beta type-6	YLSVEEVIK	0	25	Dimethyl@N-term; Dimethyl(K)@9		-0.00143399	1134.65	568.333	1134.65	568.334	2														107.48	76.66	560.41	174.36
P23724	Proteasome subunit beta type-6	NITDYSINSR	1	99	Dimethyl@N-term		-0.00347228	1209.6	605.805	1209.6	605.807	2														0	0	442.65	135.22
Q08193	1,3-beta-glucanosyltransferase GAS5	DLGINTVR	2	99	Dimethyl@N-term		-0.00525155	914.513	458.264	914.519	458.267	2
Q08193	1,3-beta-glucanosyltransferase GAS5	LYQDYSVPVFLSEFGCNQVK	2	99	Dimethyl@N-term; Carbamidomethyl(C)@16; Dimethyl(K)@20		-0.000543773	2448.2	817.075	2448.2	817.075	3
Q08193	1,3-beta-glucanosyltransferase GAS5	QLAAEYFNCGDEADAR	2	99	Dimethyl@N-term; Carbamidomethyl(C)@9		0.00339844	1856.8	929.409	1856.8	929.407	2
Q08193	1,3-beta-glucanosyltransferase GAS5	DVPVLK	2	99	Dimethyl@N-term; Dimethyl(K)@6		0.000534912	725.469	363.742	725.469	363.742	2
Q08193	1,3-beta-glucanosyltransferase GAS5	GNAFFNSESGER	1	99	Dimethyl@N-term; Deamidated(N)@2		0.0147211	1342.59	672.304	1342.58	672.297	2
Q08193	1,3-beta-glucanosyltransferase GAS5	QIPVGYSAADIVANR	0	89	Dimethyl@N-term		-0.0186788	1600.84	801.427	1600.86	801.436	2
Q08193	1,3-beta-glucanosyltransferase GAS5	LTDFENLK	0	33	Dimethyl@N-term; Dimethyl(K)@8		0.00310191	1034.57	518.291	1034.56	518.29	2
Q08193	1,3-beta-glucanosyltransferase GAS5	DVPVLK	0	34	Dimethyl@N-term; Dimethyl(K)@6		0.000534912	725.469	363.742	725.469	363.742	2
P04912	Histone H2A.2; Histone H2A.1	LLGNVTIAQGGVLPNIHQNLLPK	2	99	Dimethyl@N-term; Dimethyl(K)@23		0.00364273	2464.46	822.493	2464.45	822.492	3														0	0	752.15	176.9
P04912	Histone H2A.2; Histone H2A.1	LLGNVTIAQGGVLPNIHQNLLPK	0	99	Dimethyl@N-term; Dimethyl(K)@23		0.00364273	2464.46	822.493	2464.45	822.492	3														0	0	752.15	176.92
P04912	Histone H2A.2; Histone H2A.1	NDDELNKLLGNVTIAQGGVLPNIHQNLLPK	0	87	Dimethyl@N-term; Dimethyl(K)@7; Dimethyl(K)@30	missed K-L@7	0.00397982	3320.85	831.22	3320.85	831.219	4														0	0	0	0
P04912	Histone H2A.2; Histone H2A.1	AGLTFPVGR	2	99	Dimethyl@N-term		0.000669325	944.545	473.28	944.544	473.279	2														533.38	158.19	14181.6	812.13
P04912	Histone H2A.2; Histone H2A.1	AGLTFPVGR	0	99	Dimethyl@N-term		0.000669325	944.545	473.28	944.544	473.279	2														533.38	158.48	14181.6	812.11
P04912	Histone H2A.2; Histone H2A.1	AGLTFPVGR	0	98	Dimethyl@N-term		0.000669325	944.545	473.28	944.544	473.279	2														533.38	158.19	14181.6	812.14
P04912	Histone H2A.2; Histone H2A.1	HLQLAIR	0	72	Dimethyl:2H(6)13C(2)@N-term		-9.33e-05	885.594	443.804	885.594	443.804	2														289.97	113.76	4211.53	401.16
P04912	Histone H2A.2; Histone H2A.1	AGLTFPVGR	0	99	Dimethyl:2H(6)13C(2)@N-term		-0.000688328	952.588	477.301	952.589	477.302	2														532.25	158.02	14712	826.81
P04912	Histone H2A.2; Histone H2A.1	AGLTFPVGR	0	83	Dimethyl:2H(6)13C(2)@N-term		-0.000688328	952.588	477.301	952.589	477.302	2														532.25	158.21	14712	826.82
P04912	Histone H2A.2; Histone H2A.1	AGLTFPVGR	0	33	Dimethyl:2H(6)13C(2)@N-term		-0.000688328	952.588	477.301	952.589	477.302	2														532.25	158.02	14712	826.79
P04912	Histone H2A.2; Histone H2A.1	HLQLAIR	1	98	Dimethyl@N-term		-0.00137657	877.548	439.781	877.55	439.782	2														688.42	168.75	2228.54	295.28
P04912	Histone H2A.2; Histone H2A.1	HLQLAIR	0	98	Dimethyl@N-term		-0.00137657	877.548	439.781	877.55	439.782	2														688.42	168.6	1019.97	202.8
P04912	Histone H2A.2; Histone H2A.1	LLGNVTIAQGGVLPN	1	99	Dimethyl:2H(6)13C(2)@N-term	cleaved N-I@C-term	-0.00388235	1500.9	751.458	1500.91	751.46	2														370.56	157.94	898.52	226.78
P04912	Histone H2A.2; Histone H2A.1	LLGNVTIAQGGVLPNIHQNLLPK	0	41	Dimethyl:2H(6)13C(2)@N-term; Dimethyl:2H(6)13C(2)(K)@23		-0.00959157	2480.53	621.14	2480.54	621.143	4														0	0	343.11	117.22
P53184	Nicotinamidase	GFLTDR	1	86	Dimethyl:2H(6)13C(2)@N-term		0.0157817	743.452	372.733	743.436	372.725	2														249.12	84.05	3936.93	331.82
P53184	Nicotinamidase	TLIVVDMQNDFISPLGSLTVPK	2	99	Dimethyl@N-term; Dimethyl(K)@22		0.00501773	2442.35	815.124	2442.34	815.122	3														0	0	162.53	44.97
P53184	Nicotinamidase	TTVLLDYTRPISDDPEVINK	2	99	Dimethyl@N-term; Dimethyl(K)@20		0.00356217	2344.26	782.426	2344.25	782.425	3														115.8	73.07	4436.06	452.52
P53184	Nicotinamidase	NTWGSQLVDQIMDQVVTK	2	99	Delta:H(2)C(2)@N-term; Dimethyl(K)@18		0.00280147	2115.07	706.031	2115.07	706.03	3														45.18	20.63	0	0
P53184	Nicotinamidase	AHNINVVDK	2	99	Dimethyl@N-term; Dimethyl(K)@9		0.000862521	1064.6	355.873	1064.6	355.873	3														21.24	13.47	452.74	64.07
P53184	Nicotinamidase	NTWGSQLVDQIMDQVVTK	0	99	Dimethyl@N-term; Dimethyl(K)@18		0.00168853	2117.08	706.702	2117.08	706.701	3														27	17.26	325.66	63.35
P53184	Nicotinamidase	NTWGSQLVDQIMDQVVTK	0	99	Dimethyl:2H(6)13C(2)@N-term; Dimethyl:2H(6)13C(2)(K)@18		0.000106096	2133.17	1067.59	2133.17	1067.59	2														0	0	460.1	80.29
P53184	Nicotinamidase	ATAISAAELGYK	2	99	Dimethyl@N-term; Dimethyl(K)@12		-0.000313493	1249.69	625.853	1249.69	625.853	2														198.75	94.58	3491.91	839.54
P53184	Nicotinamidase	GEELINPISDLMQDADR	0	99	Dimethyl@N-term		-0.00067743	1942.93	972.472	1942.93	972.473	2														118.71	57.92	1960.79	232.1
P53184	Nicotinamidase	NTWGSQLVDQIMDQVVTK	0	99	Dimethyl@N-term; Dimethyl(K)@18		-0.00109385	2117.08	1059.55	2117.08	1059.55	2														0	0	439.61	78.61
P53184	Nicotinamidase	TTVLLDYTRPISDDPEVINK	0	99	Dimethyl:2H(6)13C(2)@N-term; Dimethyl:2H(6)13C(2)(K)@20		-0.00182208	2360.34	787.787	2360.34	787.788	3														118.78	73.98	4792.25	469.93
P53184	Nicotinamidase	GEELINPISDLMQDADR	2	99	Dimethyl:2H(6)13C(2)@N-term		-0.00190956	1950.97	976.494	1950.97	976.495	2														118.71	57.92	1960.79	232.1
P53184	Nicotinamidase	AHNINVVDK	0	39	Dimethyl:2H(6)13C(2)@N-term; Dimethyl:2H(6)13C(2)(K)@9		-0.00119404	1080.69	541.35	1080.69	541.351	2														29.05	16.08	503.03	67.21
P53184	Nicotinamidase	ATAISAAELGYK	0	99	Dimethyl:2H(6)13C(2)@N-term; Dimethyl:2H(6)13C(2)(K)@12		-0.00233665	1265.78	633.896	1265.78	633.898	2														255.73	106.69	4231.9	923.72
P53184	Nicotinamidase	GFLTDR	0	29	Dimethyl@N-term		-0.00148716	735.39	368.702	735.392	368.703	2														250.73	84.17	1893.38	234.66
P53184	Nicotinamidase	ATAISAAELGYK	0	99	Delta:H(2)C(2)@N-term; Dimethyl(K)@12		-0.00298115	1247.67	624.844	1247.68	624.845	2														53.2	45.97	148.88	126.62
P53131	Pre-mRNA-splicing factor ATP-dependent RNA helicase PRP43	ALEELNYLACLDDEGNLTPLGR	2	99	Dimethyl:2H(4)@N-term; Carbamidomethyl(C)@10		0.0135585	2507.27	836.762	2507.25	836.758	3
P53131	Pre-mRNA-splicing factor ATP-dependent RNA helicase PRP43	FSSEHPDPVETSIPEQAAEIAEELSK	2	99	Dimethyl:2H(4)@N-term; Dimethyl:2H(4)(K)@26		-0.988591	2902.46	968.495	2903.45	968.825	3
P53131	Pre-mRNA-splicing factor ATP-dependent RNA helicase PRP43	TTQIPQFVLFDEMPHLENTQVACTQPR	2	99	Dimethyl:2H(4)@N-term; Deamidated(N)@18; Carbamidomethyl(C)@23		-0.00769217	3232.58	809.151	3232.58	809.153	4
P53131	Pre-mRNA-splicing factor ATP-dependent RNA helicase PRP43	TYPVELYYTPEFQR	2	99	Dimethyl:2H(4)@N-term		-0.0239274	1836.9	919.457	1836.92	919.469	2
P53131	Pre-mRNA-splicing factor ATP-dependent RNA helicase PRP43	AGRAGRTRPGK	0	18	Dimethyl:2H(4)@N-term; Dimethyl:2H(4)(K)@11	missed R-A@3; missed R-T@6	-0.00650557	1189.75	595.884	1189.76	595.888	2
P53131	Pre-mRNA-splicing factor ATP-dependent RNA helicase PRP43	ALEELNYLACLDDEGNLTPLGR	0	99	Dimethyl:2H(4)@N-term; Carbamidomethyl(C)@10		1.01713	2508.27	837.097	2507.25	836.758	3
P22803	Thioredoxin-2	VVGANPAAIK	0	83	Dimethyl:2H(4)@N-term; Dimethyl:2H(4)(K)@10		-0.00042286	1002.67	502.341	1002.67	502.341	2														618.26	180.25	117.82
P22803	Thioredoxin-2	VVGANPAAIK	0	96	Dimethyl:2H(4)@N-term; Dimethyl:2H(4)(K)@10		-0.00042286	1002.67	502.341	1002.67	502.341	2														618.26	180.25	117.82
P22803	Thioredoxin-2	VVGANPAAIK	2	99	Dimethyl:2H(4)@N-term; Dimethyl:2H(4)(K)@10		-0.00042286	1002.67	502.341	1002.67	502.341	2														618.25	180.25	117.78
P22803	Thioredoxin-2	FAEQYSDAAFYK	2	99	Dimethyl:2H(4)@N-term; Dimethyl:2H(4)(K)@12		-0.00207071	1502.75	752.383	1502.75	752.384	2														364.95	259.45	212.97
P22803	Thioredoxin-2	LDVDEVSDVAQK	2	99	Dimethyl:2H(4)@N-term; Dimethyl:2H(4)(K)@12		0.00182783	1380.76	691.388	1380.76	691.387	2														513.49	430.32	175.79
P22803	Thioredoxin-2	FAEQYSDAAFYK	0	99	Dimethyl:2H(4)@N-term; Dimethyl:2H(4)(K)@12		-0.00207071	1502.75	752.383	1502.75	752.384	2														364.86	259.45	212.92
P22803	Thioredoxin-2	LDVDEVSDVAQK	0	99	Dimethyl:2H(4)@N-term; Dimethyl:2H(4)(K)@12		0.00182783	1380.76	691.388	1380.76	691.387	2														513.48	430.32	175.64
P22803	Thioredoxin-2	AEVSSMPTLIFYK	2	99	Dimethyl:2H(4)@N-term; Dimethyl:2H(4)(K)@13		0.00109233	1548.87	775.443	1548.87	775.443	2														334.52	0	0
P22803	Thioredoxin-2	AEVSSMPTLIFYK	0	99	Dimethyl:2H(4)@N-term; Dimethyl:2H(4)(K)@13		0.00109233	1548.87	775.443	1548.87	775.443	2														334.48	0	0
P22803	Thioredoxin-2	AEVSSMPTLIFYK	0	99	Dimethyl:2H(4)@N-term; Dimethyl:2H(4)(K)@13		1.00073	1549.87	775.943	1548.87	775.443	2														333.16	0	0
P22803	Thioredoxin-2	SASEYDSALASGDK	2	99	Dimethyl:2H(4)@N-term; Dimethyl:2H(4)(K)@14		0.00246716	1463.73	732.87	1463.72	732.869	2														307.93	196.49	114.63
P22803	Thioredoxin-2	SASEYDSALASGDK	0	99	Dimethyl:2H(4)@N-term; Dimethyl:2H(4)(K)@14		0.00246716	1463.73	732.87	1463.72	732.869	2														307.89	196.49	114.57
P22803	Thioredoxin-2	MIAPMIEK	2	99	Dimethyl:2H(4)@N-term; Dimethyl:2H(4)(K)@8		0.000153398	995.6	498.807	995.6	498.807	2														753.31	0	0
P22943	12 kDa heat shock protein	GKDNAEGQGESLADQAR	2	99	Dimethyl@N-term; Dimethyl(K)@2	missed K-D@2	0.00304647	1800.86	601.295	1800.86	601.294	3
P22943	12 kDa heat shock protein	GVFQGVHDSAEKGKDNAEGQGESLADQAR	2	99	Dimethyl:2H(4)@N-term; Dimethyl:2H(4)(K)@12; Dimethyl:2H(4)(K)@14	missed K-G@12; missed K-D@14	0.00820098	3095.57	774.901	3095.57	774.899	4
P22943	12 kDa heat shock protein	SKLNDAVEYVSGR	2	99	Dimethyl:2H(4)@N-term; Dimethyl:2H(4)(K)@2	missed K-L@2	-0.000178807	1500.84	751.427	1500.84	751.427	2
P22943	12 kDa heat shock protein	SYAEQGKEYITDK	2	99	Dimethyl:2H(4)@N-term; Dimethyl:2H(4)(K)@7; Dimethyl:2H(4)(K)@13	missed K-E@7	0.000685757	1626.89	543.304	1626.89	543.304	3
P22943	12 kDa heat shock protein	NDAVEYVSGR	1	99	Dimethyl:2H(4)@N-term	cleaved L-N@N-term	0.00241299	1140.57	571.294	1140.57	571.293	2
P22943	12 kDa heat shock protein	GVFQGVHDSAEK	1	96	Dimethyl:2H(4)@N-term; Dimethyl:2H(4)(K)@12		0.00886543	1336.73	446.584	1336.72	446.582	3
P22943	12 kDa heat shock protein	LNDAVEYVSGR	0	78	Dimethyl:2H(4)@N-term		0.0622256	1253.72	418.913	1253.66	418.892	3
P22943	12 kDa heat shock protein	GKDNAEGQGESLADQAR	0	99	Dimethyl:2H(4)@N-term; Dimethyl:2H(4)(K)@2	missed K-D@2	0.000295759	1808.91	603.977	1808.91	603.977	3
P22943	12 kDa heat shock protein	GKDNAEGQGESLADQAR	0	99	Dimethyl:2H(4)@N-term; Dimethyl:2H(4)(K)@2	missed K-D@2	0.000295759	1808.91	603.977	1808.91	603.977	3
P22943	12 kDa heat shock protein	GKDNAEGQGESLADQAR	0	99	Dimethyl:2H(4)@N-term; Dimethyl:2H(4)(K)@2; Deamidated(N)@4	missed K-D@2	-0.00300962	1809.89	604.304	1809.89	604.305	3
P22943	12 kDa heat shock protein	GKDNAEGQGESLADQAR	0	99	Dimethyl:2H(4)@N-term; Dimethyl:2H(4)(K)@2	missed K-D@2	0.00149144	1808.91	453.235	1808.91	453.235	4
P22943	12 kDa heat shock protein	GKDNAEGQGESLADQAR	0	99	Dimethyl:2H(4)@N-term; Dimethyl:2H(4)(K)@2	missed K-D@2	0.000295759	1808.91	603.977	1808.91	603.977	3
P22943	12 kDa heat shock protein	GKDNAEGQGESLADQAR	0	99	Dimethyl:2H(4)@N-term; Dimethyl:2H(4)(K)@2; Deamidated(N)@4	missed K-D@2	0.0251885	1809.92	604.314	1809.89	604.305	3
P22943	12 kDa heat shock protein	NDAVEYVSGR	0	90	Dimethyl:2H(4)@N-term	cleaved L-N@N-term	0.00241299	1140.57	571.294	1140.57	571.293	2
P22943	12 kDa heat shock protein	SKLNDAVEYVSGR	0	99	Dimethyl:2H(4)@N-term; Dimethyl:2H(4)(K)@2	missed K-L@2	0.000187402	1500.84	751.427	1500.84	751.427	2
P43593	Ubiquitin carboxyl-terminal hydrolase 6	FLTVQYVR	0	16	Dimethyl:2H(4)@N-term		-0.0125263	1056.61	529.314	1056.63	529.321	2														495.89	3762.01	592.4
P43593	Ubiquitin carboxyl-terminal hydrolase 6	NGLLEGLNEK	0	92	Dimethyl:2H(4)@N-term; Deamidated(N)@1; Dimethyl:2H(4)(K)@10		0.000915307	1150.67	576.342	1150.67	576.342	2														208.11	244.45	120.34
P43593	Ubiquitin carboxyl-terminal hydrolase 6	AEELTQVPSAR	2	99	Dimethyl:2H(4)@N-term		-0.000464857	1231.67	616.842	1231.67	616.843	2														231.76	470.83	309.48
P43593	Ubiquitin carboxyl-terminal hydrolase 6	SVLPIVLLNTLR	2	99	Dimethyl:2H(4)@N-term		-0.00319607	1368.9	685.456	1368.9	685.458	2														76.36	0	0
P43593	Ubiquitin carboxyl-terminal hydrolase 6	NGLLEGLNEK	1	99	Dimethyl:2H(4)@N-term; Deamidated(N)@1; Dimethyl:2H(4)(K)@10		0.000915307	1150.67	576.342	1150.67	576.342	2														208.28	184.81	94.9
P43593	Ubiquitin carboxyl-terminal hydrolase 6	SDLTGANSIYSVEK	2	99	Dimethyl:2H(4)@N-term; Dimethyl:2H(4)(K)@14		-0.0133527	1546.82	774.417	1546.83	774.424	2														289.41	0	0
P43593	Ubiquitin carboxyl-terminal hydrolase 6	VVFPFQLDVADMLTPEYAAEK	2	99	Dimethyl:2H(4)@N-term; Dimethyl:2H(4)(K)@21		0.00343205	2446.3	816.44	2446.29	816.439	3														38.88	12.02	16.27
P19882	Heat shock protein 60, mitochondrial	AAVEEGILPGGGTALVK	2	99	Dimethyl:2H(4)@N-term; Dimethyl:2H(4)(K)@17		0.00121725	1644.99	823.503	1644.99	823.502	2
P19882	Heat shock protein 60, mitochondrial	LIDEYGDDFAK	2	99	Dimethyl:2H(4)@N-term; Dimethyl:2H(4)(K)@11		-0.00356075	1348.7	675.356	1348.7	675.357	2
P19882	Heat shock protein 60, mitochondrial	NVAAGCNPMDLR	2	99	Dimethyl@N-term; Carbamidomethyl(C)@6		0.0120722	1344.64	673.327	1344.63	673.321	2
P19882	Heat shock protein 60, mitochondrial	NVLIEQPFGPPK	2	99	Dimethyl@N-term; Dimethyl(K)@12		-0.00149792	1393.8	697.905	1393.8	697.906	2
P19882	Heat shock protein 60, mitochondrial	SEYTDMLATGIIDPFK	2	99	Dimethyl:2H(4)@N-term; Dimethyl:2H(4)(K)@16		-0.00327758	1863.97	932.995	1863.98	932.996	2
P19882	Heat shock protein 60, mitochondrial	TLEDELEVTEGMR	2	99	Dimethyl:2H(4)@N-term		-0.00488127	1552.75	777.385	1552.76	777.387	2
P19882	Heat shock protein 60, mitochondrial	TNEAAGDGTTSATVLGR	2	99	Dimethyl:2H(4)@N-term		0.00119551	1651.83	826.924	1651.83	826.923	2
P19882	Heat shock protein 60, mitochondrial	VGGASEVEVGEK	2	99	Dimethyl@N-term; Dimethyl(K)@12		-0.0123386	1215.62	608.818	1215.63	608.825	2
P19882	Heat shock protein 60, mitochondrial	VGGASEVEVGEKK	2	99	Dimethyl:2H(4)@N-term; Dimethyl:2H(4)(K)@12; Dimethyl:2H(4)(K)@13	missed K-K@12	0.00177678	1383.84	462.287	1383.84	462.286	3
P19882	Heat shock protein 60, mitochondrial	VLDEVVVDNFDQK	2	99	Dimethyl:2H(4)@N-term; Dimethyl:2H(4)(K)@13		0.000564461	1582.87	792.442	1582.87	792.442	2
P19882	Heat shock protein 60, mitochondrial	DRYDDALNATR	1	98	Dimethyl:2H(4)@N-term	missed R-Y@2	-8.2e-05	1340.66	447.895	1340.66	447.895	3
P19882	Heat shock protein 60, mitochondrial	LIDEYGDDFAK	0	99	Dimethyl@N-term; Dimethyl(K)@11		0.00116719	1340.65	671.333	1340.65	671.332	2
P19882	Heat shock protein 60, mitochondrial	NVLIEQPFGPPK	0	99	Dimethyl:2H(4)@N-term; Dimethyl:2H(4)(K)@12		-0.0010251	1401.85	701.93	1401.85	701.931	2
P19882	Heat shock protein 60, mitochondrial	NVLIEQPFGPPK	0	99	Dimethyl:2H(4)@N-term; Dimethyl:2H(4)(K)@12		0.00117214	1401.85	701.932	1401.85	701.931	2
P19882	Heat shock protein 60, mitochondrial	NVLIEQPFGPPK	0	99	Dimethyl:2H(4)@N-term; Dimethyl:2H(4)(K)@12		0.00141627	1401.85	701.932	1401.85	701.931	2
P19882	Heat shock protein 60, mitochondrial	NVLIEQPFGPPK	0	99	Dimethyl:2H(4)@N-term; Dimethyl:2H(4)(K)@12		-0.0010251	1401.85	701.93	1401.85	701.931	2
P19882	Heat shock protein 60, mitochondrial	SEYTDMLATGIIDPFK	0	93	Dimethyl:2H(4)@N-term; Dimethyl:2H(4)(K)@16		0.067175	1864.05	622.356	1863.98	622.333	3
P19882	Heat shock protein 60, mitochondrial	SEYTDMLATGIIDPFK	0	85	Dimethyl@N-term; Dimethyl(K)@16		0.0422226	1855.97	619.664	1855.93	619.65	3
P19882	Heat shock protein 60, mitochondrial	TNEAAGDGTTSATVLGR	0	99	Dimethyl:2H(4)@N-term		-1.00774	1650.82	551.282	1651.83	551.618	3
P19882	Heat shock protein 60, mitochondrial	TNEAAGDGTTSATVLGR	0	96	Dimethyl@N-term		-1.01006	1646.8	824.405	1647.81	824.91	2
P19882	Heat shock protein 60, mitochondrial	TNEAAGDGTTSATVLGR	0	29	Dimethyl@N-term		-0.0192448	1647.79	550.27	1647.81	550.276	3
P19882	Heat shock protein 60, mitochondrial	VLDEVVVDNFDQK	0	99	Dimethyl:2H(4)@N-term; Dimethyl:2H(4)(K)@13		-0.00217527	1582.87	528.63	1582.87	528.63	3
P19882	Heat shock protein 60, mitochondrial	VLDEVVVDNFDQK	0	89	Dimethyl@N-term; Dimethyl(K)@13		-0.0195013	1574.8	525.941	1574.82	525.947	3
P05739	60S ribosomal protein L6-B	EANLFPEQQTK	2	99	Dimethyl@N-term; Dimethyl(K)@11		0.0023243	1359.71	680.86	1359.7	680.859	2
P05739	60S ribosomal protein L6-B	WYPSEDVAAPK	2	99	Dimethyl:2H(4)@N-term; Dimethyl:2H(4)(K)@11		-0.00642448	1325.7	663.859	1325.71	663.863	2
P05739	60S ribosomal protein L6-B	KEANLFPEQQTK	1	98	Dimethyl:2H(4)@N-term; Dimethyl:2H(4)(K)@1; Dimethyl:2H(4)(K)@12	missed K-E@1	-0.0245356	1527.88	510.301	1527.91	510.309	3
P05739	60S ribosomal protein L6-B	HLEDNTLLVTGPFK	0	99	Dimethyl:2H(4)@N-term; Dimethyl:2H(4)(K)@14		-0.000964792	1646.95	549.99	1646.95	549.99	3
P05739	60S ribosomal protein L6-B	NGDKPHLLK	0	29	Dimethyl:2H(4)@N-term; Deamidated(N)@1; Dimethyl:2H(4)(K)@4; Dimethyl:2H(4)(K)@9		-0.000500913	1117.72	373.582	1117.72	373.582	3
P05739	60S ribosomal protein L6-B	ALLAEIK	0	99	Dimethyl:2H(4)@N-term; Dimethyl:2H(4)(K)@7		0.00173488	820.589	411.302	820.587	411.301	2
P05739	60S ribosomal protein L6-B	ALLAEIK	0	99	Dimethyl:2H(4)@N-term; Dimethyl:2H(4)(K)@7		0.000697292	820.588	411.301	820.587	411.301	2
P05739	60S ribosomal protein L6-B	ALLAEIK	0	99	Dimethyl:2H(4)@N-term; Dimethyl:2H(4)(K)@7		0.00173488	820.589	411.302	820.587	411.301	2
P05739	60S ribosomal protein L6-B	ALLAEIK	0	40	Dimethyl:2H(4)@N-term; Dimethyl:2H(4)(K)@7		0.00191798	820.589	411.302	820.587	411.301	2
P05739	60S ribosomal protein L6-B	ASLVPGTVLILLAGR	0	99	Dimethyl:2H(4)@N-term		0.00163193	1510.98	756.495	1510.97	756.495	2
P05739	60S ribosomal protein L6-B	FNVEYFAK	0	99	Dimethyl:2H(4)@N-term; Dimethyl:2H(4)(K)@8		0.000272751	1080.61	541.312	1080.61	541.312	2
P05739	60S ribosomal protein L6-B	FNVEYFAK	0	99	Dimethyl:2H(4)@N-term; Dimethyl:2H(4)(K)@8		0.000272751	1080.61	541.312	1080.61	541.312	2
P05739	60S ribosomal protein L6-B	FNVEYFAK	0	90	Dimethyl@N-term; Dimethyl(K)@8		0.00513105	1072.56	537.289	1072.56	537.287	2
P05739	60S ribosomal protein L6-B	FNVEYFAK	0	29	Dimethyl@N-term; Dimethyl(K)@8		0.00586345	1072.57	537.29	1072.56	537.287	2
P05739	60S ribosomal protein L6-B	HLEDNTLLVTGPFK	0	99	Dimethyl:2H(4)@N-term; Dimethyl:2H(4)(K)@14		-0.000964792	1646.95	549.99	1646.95	549.99	3
P05739	60S ribosomal protein L6-B	HLEDNTLLVTGPFK	0	99	Dimethyl:2H(4)@N-term; Dimethyl:2H(4)(K)@14		-0.00133099	1646.95	549.99	1646.95	549.99	3
P05739	60S ribosomal protein L6-B	HLEDNTLLVTGPFK	0	99	Dimethyl:2H(4)@N-term; Dimethyl:2H(4)(K)@14		-0.000415488	1646.95	549.99	1646.95	549.99	3
P05739	60S ribosomal protein L6-B	HLEDNTLLVTGPFK	0	97	Dimethyl:2H(4)@N-term; Dimethyl:2H(4)(K)@14		-0.00462682	1646.94	549.989	1646.95	549.99	3
P05739	60S ribosomal protein L6-B	HLEDNTLLVTGPFK	0	97	Dimethyl:2H(4)@N-term; Dimethyl:2H(4)(K)@14		-0.00462682	1646.94	549.989	1646.95	549.99	3
P05739	60S ribosomal protein L6-B	HLEDNTLLVTGPFK	0	90	Dimethyl:2H(4)@N-term; Dimethyl:2H(4)(K)@14		0.00457246	1646.95	824.484	1646.95	824.481	2
P05739	60S ribosomal protein L6-B	HLEDNTLLVTGPFK	0	88	Dimethyl:2H(4)@N-term; Deamidated(N)@5; Dimethyl:2H(4)(K)@14		0.0240915	1647.96	550.326	1647.93	550.318	3
P05739	60S ribosomal protein L6-B	HLEDNTLLVTGPFK	0	41	Dimethyl:2H(4)@N-term; Dimethyl:2H(4)(K)@14		-0.00348396	1646.94	824.48	1646.95	824.481	2
P05739	60S ribosomal protein L6-B	LRASLVPGTVLILLAGR	0	99	Dimethyl:2H(4)@N-term	missed R-A@2	-0.00108961	1780.16	594.394	1780.16	594.394	3
P05739	60S ribosomal protein L6-B	QYLSASFSLK	0	99	Dimethyl:2H(4)@N-term; Dimethyl:2H(4)(K)@10		0.00280278	1206.71	604.364	1206.71	604.362	2
P05739	60S ribosomal protein L6-B	QYLSASFSLK	0	99	Dimethyl:2H(4)@N-term; Dimethyl:2H(4)(K)@10		0.0053662	1206.72	604.365	1206.71	604.362	2
P05739	60S ribosomal protein L6-B	QYLSASFSLK	0	99	Dimethyl:2H(4)@N-term; Dimethyl:2H(4)(K)@10		0.00280278	1206.71	604.364	1206.71	604.362	2
P05739	60S ribosomal protein L6-B	VNGVPLR	0	52	Dimethyl:2H(4)@N-term; Deamidated(N)@2		0.00128403	786.491	394.253	786.49	394.252	2
P05739	60S ribosomal protein L6-B	VNGVPLR	0	43	Dimethyl:2H(4)@N-term; Deamidated(N)@2		0.00128403	786.491	394.253	786.49	394.252	2
P05739	60S ribosomal protein L6-B	VSVEGVNVEK	0	99	Dimethyl:2H(4)@N-term; Dimethyl:2H(4)(K)@10		-0.0031006	1122.67	562.342	1122.67	562.344	2
P05739	60S ribosomal protein L6-B	VSVEGVNVEK	0	99	Dimethyl:2H(4)@N-term; Dimethyl:2H(4)(K)@10		-0.000659232	1122.67	562.344	1122.67	562.344	2
P05739	60S ribosomal protein L6-B	VSVEGVNVEK	0	99	Dimethyl@N-term; Dimethyl(K)@10		-0.00231309	1114.62	558.318	1114.62	558.319	2
P05739	60S ribosomal protein L6-B	VSVEGVNVEK	0	99	Dimethyl:2H(4)@N-term; Dimethyl:2H(4)(K)@10		-0.000659232	1122.67	562.344	1122.67	562.344	2
P05739	60S ribosomal protein L6-B	VSVEGVNVEK	0	99	Dimethyl:2H(4)@N-term; Deamidated(N)@7; Dimethyl:2H(4)(K)@10		0.0208016	1123.68	562.846	1123.66	562.836	2
P05739	60S ribosomal protein L6-B	VSVEGVNVEK	0	99	Dimethyl@N-term; Dimethyl(K)@10		-0.00231309	1114.62	558.318	1114.62	558.319	2
P05739	60S ribosomal protein L6-B	WYPSEDVAAPK	0	99	Dimethyl:2H(4)@N-term; Dimethyl:2H(4)(K)@11		-0.00642448	1325.7	663.859	1325.71	663.863	2
P05739	60S ribosomal protein L6-B	YVIATSTK	0	98	Dimethyl:2H(4)@N-term; Dimethyl:2H(4)(K)@8		0.000813862	945.599	473.807	945.599	473.807	2
P05739	60S ribosomal protein L6-B	YVIATSTK	0	98	Dimethyl:2H(4)@N-term; Dimethyl:2H(4)(K)@8		0.000996965	945.6	473.807	945.599	473.807	2
P05739	60S ribosomal protein L6-B	YVIATSTK	0	98	Dimethyl:2H(4)@N-term; Dimethyl:2H(4)(K)@8		0.000996965	945.6	473.807	945.599	473.807	2
P05739	60S ribosomal protein L6-B	YVIATSTK	0	98	Dimethyl:2H(4)@N-term; Dimethyl:2H(4)(K)@8		0.000996965	945.6	473.807	945.599	473.807	2
P05739	60S ribosomal protein L6-B	YVIATSTK	0	91	Dimethyl@N-term; Dimethyl(K)@8		0.00232853	937.551	469.783	937.548	469.781	2
P36060	NADH-cytochrome b5 reductase 2	ESTHLFVCGPPPFMNAYSGEK	2	99	Dimethyl:2H(4)@N-term; Carbamidomethyl(C)@8; Dimethyl:2H(4)(K)@21		-0.00712105	2431.17	811.398	2431.18	811.4	3
P36060	NADH-cytochrome b5 reductase 2	ESTHLFVCGPPPFMNAYSGEK	0	99	Dimethyl:2H(4)@N-term; Carbamidomethyl(C)@8; Dimethyl:2H(4)(K)@21		-0.0029097	2431.18	811.399	2431.18	811.4	3
P36060	NADH-cytochrome b5 reductase 2	ESTHLFVCGPPPFMNAYSGEK	0	99	Dimethyl:2H(4)@N-term; Carbamidomethyl(C)@8; Dimethyl:2H(4)(K)@21		-0.0029097	2431.18	811.399	2431.18	811.4	3
P36060	NADH-cytochrome b5 reductase 2	ESTHLFVCGPPPFMNAYSGEK	0	99	Dimethyl:2H(4)@N-term; Carbamidomethyl(C)@8; Dimethyl:2H(4)(K)@21		0.00496371	2431.18	811.402	2431.18	811.4	3
P36060	NADH-cytochrome b5 reductase 2	DFIQEHVPGPK	2	99	Dimethyl:2H(4)@N-term; Dimethyl:2H(4)(K)@11		-0.000813953	1329.75	444.258	1329.75	444.258	3
P36060	NADH-cytochrome b5 reductase 2	DQGELIGILNNLGYSK	0	99	Dimethyl:2H(4)@N-term; Dimethyl:2H(4)(K)@16		0.0043969	1797.02	600.013	1797.01	600.011	3
P36060	NADH-cytochrome b5 reductase 2	GSNVVRPYTPVSDLSQK	2	99	Dimethyl:2H(4)@N-term; Dimethyl:2H(4)(K)@17		-1.00874	1909.06	637.361	1910.07	637.698	3
P36060	NADH-cytochrome b5 reductase 2	DQVFKF	0	19	Dimethyl:2H(4)@N-term; Dimethyl:2H(4)(K)@5	missed K-F@5	-0.00269216	846.506	424.26	846.509	424.262	2
P36060	NADH-cytochrome b5 reductase 2	TPQDILLRK	0	17	Dimethyl:2H(4)@N-term; Dimethyl:2H(4)(K)@9	missed R-K@8	0.000176804	1146.76	383.26	1146.76	383.26	3
P36060	NADH-cytochrome b5 reductase 2	SITLLGAGTGINPLYQLAH	2	99	Dimethyl@N-term	cleaved H-H@C-term	-0.00122619	1966.09	656.37	1966.09	656.37	3
P36060	NADH-cytochrome b5 reductase 2	TPQDILLR	0	72	Dimethyl@N-term		0.0067744	982.588	492.301	982.581	492.298	2
P36060	NADH-cytochrome b5 reductase 2	DFIQEHVPGPK	0	99	Dimethyl@N-term; Dimethyl(K)@11		0.000431285	1321.7	441.575	1321.7	441.575	3
P36060	NADH-cytochrome b5 reductase 2	DFIQEHVPGPK	0	98	Dimethyl@N-term; Dimethyl(K)@11		-0.0243077	1321.68	661.847	1321.7	661.859	2
P36060	NADH-cytochrome b5 reductase 2	NQHSFVFNESNK	2	99	Dimethyl@N-term; Dimethyl(K)@12		0.00200974	1505.73	502.917	1505.73	502.916	3
P36060	NADH-cytochrome b5 reductase 2	DQGELIGILNNLGYSK	2	99	Dimethyl@N-term; Dimethyl(K)@16		-0.00278859	1788.96	597.327	1788.96	597.328	3
P36060	NADH-cytochrome b5 reductase 2	LPTEDSEMGLVLASALFAK	2	99	Dimethyl@N-term; Dimethyl(K)@19		-0.00577208	2047.09	683.369	2047.09	683.371	3
P36060	NADH-cytochrome b5 reductase 2	LPTEDSEMGLVLASALFAK	0	99	Dimethyl@N-term; Dimethyl(K)@19		-0.00577208	2047.09	683.369	2047.09	683.371	3
P36060	NADH-cytochrome b5 reductase 2	WQPNQFK	0	20	Dimethyl@N-term; Dimethyl(K)@7		0.00146427	1002.53	502.272	1002.53	502.272	2
P36060	NADH-cytochrome b5 reductase 2	VNLLYGNK	1	98	Dimethyl@N-term; Dimethyl(K)@8		-0.00333871	975.572	488.793	975.575	488.795	2
P36060	NADH-cytochrome b5 reductase 2	WIDLPISK	1	93	Dimethyl@N-term; Dimethyl(K)@8		-0.0015136	1026.61	514.312	1026.61	514.313	2
P36060	NADH-cytochrome b5 reductase 2	WIDLPISK	0	37	Dimethyl@N-term; Dimethyl(K)@8		-0.0221432	1026.59	514.302	1026.61	514.313	2
P36060	NADH-cytochrome b5 reductase 2	MTSHLFGLKPNDTVSFK	2	99	Dimethyl@N-term; Dimethyl(K)@9; Dimethyl(K)@17		0.00227356	2005.07	502.276	2005.07	502.275	4
P36060	NADH-cytochrome b5 reductase 2	LPTEDSEMGLVLASALFAK	0	99	Dimethyl@N-term; Oxidation(M)@8; Dimethyl(K)@19		0.00204106	2063.09	688.703	2063.09	688.703	3
P38298	Alkaline ceramidase YPC1	YSLELFGPYVEDQSIEVK	0	99	Dimethyl@N-term; Deamidated(Q)@13; Dimethyl(K)@18		0.0224393	2172.11	725.044	2172.09	725.037	3														0	0	234.89	97.95
P38298	Alkaline ceramidase YPC1	YSLELFGPYVEDQSIEVK	2	99	Dimethyl:2H(6)13C(2)@N-term; Dimethyl:2H(6)13C(2)(K)@18		-0.00979368	2187.18	730.068	2187.19	730.071	3														11.93	23.21	358.65	120.14
Q04935	Cytochrome c oxidase protein 20, mitochondrial	FADDLSNSQLAK	2	99	Dimethyl:2H(4)@N-term; Dimethyl:2H(4)(K)@12		-0.0056729	1371.74	686.879	1371.75	686.882	2
Q04935	Cytochrome c oxidase protein 20, mitochondrial	SFQIAQLAK	2	99	Dimethyl@N-term; Dimethyl(K)@9		-0.0046625	1060.62	531.319	1060.63	531.321	2
Q04935	Cytochrome c oxidase protein 20, mitochondrial	ILLEDTPPK	1	99	Dimethyl@N-term; Dimethyl(K)@9		-0.00947184	1080.63	541.324	1080.64	541.329	2
Q04935	Cytochrome c oxidase protein 20, mitochondrial	QSQFEQSNQNLSQASSEK	1	99	Dimethyl:2H(4)@N-term; Dimethyl:2H(4)(K)@18		0.976673	2104.01	702.343	2103.03	702.018	3
Q04935	Cytochrome c oxidase protein 20, mitochondrial	FADDLSNSQLAK	0	99	Dimethyl@N-term; Deamidated(N)@7; Dimethyl(K)@12		-0.00695867	1364.68	683.345	1364.68	683.348	2
Q04935	Cytochrome c oxidase protein 20, mitochondrial	ILLEDTPPK	0	68	Dimethyl@N-term; Dimethyl(K)@9		-0.00642009	1080.64	541.326	1080.64	541.329	2
Q04935	Cytochrome c oxidase protein 20, mitochondrial	SFQIAQLAK	0	99	Dimethyl@N-term; Dimethyl(K)@9		-0.0046625	1060.62	531.319	1060.63	531.321	2
Q04935	Cytochrome c oxidase protein 20, mitochondrial	SFQIAQLAK	0	30	Dimethyl:2H(4)@N-term; Dimethyl:2H(4)(K)@9		-0.00196178	1068.68	535.346	1068.68	535.346	2
P53252	Sphingolipid long chain base-responsive protein PIL1	VAEAQLSNITR	0	67	Dimethyl@N-term	cleaved L-V@N-term	2.98363	1231.66	616.838	1228.68	615.346	2														221.9	110.47	167.35	98.85
P53252	Sphingolipid long chain base-responsive protein PIL1	AEAESLVAEAQLSNITR	0	99	Dimethyl@N-term		2.00987	1830.96	611.328	1828.95	610.658	3														2001.27	329.22	30846.3	1309.82
P53252	Sphingolipid long chain base-responsive protein PIL1	QLSIWGLENDDDVSDITDK	0	98	Dimethyl@N-term; Dimethyl(K)@19		1.97781	2220.04	1111.03	2218.06	1110.04	2														0	0	0	0
P53252	Sphingolipid long chain base-responsive protein PIL1	SAAGAFGPELSR	0	99	Dimethyl@N-term		1.0013	1190.61	596.312	1189.61	595.812	2														6284.25	560	37175.8	1361.45
P53252	Sphingolipid long chain base-responsive protein PIL1	QLQNPPPPPSTTK	2	99	Dimethyl@N-term; Dimethyl(K)@13	cleaved S-Q@N-term	0.999705	1460.8	731.409	1459.8	730.909	2														0	0	0	0
P53252	Sphingolipid long chain base-responsive protein PIL1	ALLELLDDSPVTPGETRPAYDGYEASK	0	99	Dimethyl@N-term; Dimethyl(K)@27		2.01793	2964.5	742.132	2962.48	741.628	4														0	0	16702.9	852.02
P53252	Sphingolipid long chain base-responsive protein PIL1	AAFNYQFDSIIEHSEK	0	95	Dimethyl@N-term; Dimethyl(K)@16		1.0057	1954.95	652.658	1953.95	652.323	3														0	0	13625.7	916.5
P53252	Sphingolipid long chain base-responsive protein PIL1	AEAESLVAEAQLSNITR	0	97	Dimethyl@N-term; Deamidated(Q)@11		0.062965	1830	611.007	1829.94	610.986	3														27.16	37.24	980.12	214.15
P53252	Sphingolipid long chain base-responsive protein PIL1	AEAESLVAEAQLSNITR	0	29	Dimethyl@N-term; Deamidated(Q)@11; Deamidated(N)@14		0.0423902	1830.96	611.328	1830.92	611.314	3														102.05	69.97	1706.49	333.86
P53252	Sphingolipid long chain base-responsive protein PIL1	QLSIWGLENDDDVSDITDK	2	99	Dimethyl:2H(6)13C(2)@N-term; Oxidation(W)@5; Deamidated(N)@9; Dimethyl:2H(6)13C(2)(K)@19		0.0485481	2251.18	751.401	2251.13	751.385	3														289.11	111.21	2110.57	300.29
P53252	Sphingolipid long chain base-responsive protein PIL1	AEAESLVAEAQLSNITR	0	94	Carbamyl@N-term		0.0383499	1843.97	922.99	1843.93	922.971	2
P53252	Sphingolipid long chain base-responsive protein PIL1	AEAESLVAEAQLSNITR	0	57	Carbamyl@N-term		0.0383499	1843.97	922.99	1843.93	922.971	2
P53252	Sphingolipid long chain base-responsive protein PIL1	AEAESLVAEAQLSNITR	0	73	Dimethyl@N-term; Cation:Na(E)@4		0.0346989	1850.97	617.997	1850.94	617.986	3														0	0	1052.17	238.84
P53252	Sphingolipid long chain base-responsive protein PIL1	AEAESLVAEAQLSNITR	0	70	Delta:H(2)C(2)@N-term		0.0299754	1826.97	914.491	1826.94	914.476	2
P53252	Sphingolipid long chain base-responsive protein PIL1	ALLELLDDSPVTPGETRPAYDGYEASK	0	99	Dimethyl@N-term; Oxidation(P)@13; Pro->pyro-Glu(P)@18; Dimethyl(K)@27		0.0406404	2992.5	998.506	2992.46	998.492	3														113.74	71.01	0	0
P53252	Sphingolipid long chain base-responsive protein PIL1	QLSIWGLENDDDVSDITDK	0	99	Dimethyl@N-term; Cation:Na(E)@8; Dimethyl(K)@19		0.0294034	2240.08	747.699	2240.05	747.689	3														0	0	723.05	175.84
P53252	Sphingolipid long chain base-responsive protein PIL1	AEAESLVAEAQLSNITR	0	99	Dimethyl:2H(6)13C(2)@N-term; Deamidated(Q)@11		0.0188205	1838	613.674	1837.98	613.668	3														641.85	187.06	30760	1308.03
P53252	Sphingolipid long chain base-responsive protein PIL1	AAFNYQFDSIIEHSEK	0	97	Dimethyl:2H(6)13C(2)@N-term; Deamidated(N)@4; Deamidated(Q)@6; Dimethyl:2H(6)13C(2)(K)@16		0.0192335	1972.02	658.348	1972	658.342	3														0	0	1670.29	267.88
P53252	Sphingolipid long chain base-responsive protein PIL1	AEAESLVAEAQLSNITR	0	45	Carbamyl@N-term		0.0170639	1843.94	615.655	1843.93	615.65	3
P53252	Sphingolipid long chain base-responsive protein PIL1	APTASQLQNPPPPPSTTK	0	30	Dimethyl:2H(6)13C(2)@N-term; Deamidated(N)@9; Dimethyl:2H(6)13C(2)(K)@18		0.0173754	1904.1	635.707	1904.08	635.702	3														76.69	57.56	11644.6	713.95
P53252	Sphingolipid long chain base-responsive protein PIL1	AEAESLVAEAQLSNITR	0	18	Dimethyl:2H(4)@N-term; Deamidated(Q)@11		0.0148978	1833.98	917.996	1833.96	917.988	2														2336.08	332.26	532.07	169.98
P53252	Sphingolipid long chain base-responsive protein PIL1	AAFNYQFDSIIEHSEK	0	45	No Dimethyl@N-term; Deamidated(N)@4; Dimethyl(K)@16		0.0124013	1926.91	964.463	1926.9	964.457	2														149.17	78.94	0	0
P53252	Sphingolipid long chain base-responsive protein PIL1	APTASQLQNPPPPPSTTK	0	99	Dimethyl@N-term; Dimethyl(K)@18		0.0108211	1887.02	630.014	1887.01	630.011	3														95.56	64.66	11693.4	715.17
P53252	Sphingolipid long chain base-responsive protein PIL1	APTASQLQNPPPPPSTTK	0	99	Dimethyl@N-term; Dimethyl(K)@18		0.0108211	1887.02	630.014	1887.01	630.011	3														95.56	64.75	11693.4	716.16
[truncated: 21,406 more rows]

## Sheet: 4_peptides
Table S1-4. Peptide identification results for 531 proteins with TU:BL ratios
[truncated: 11,455 more rows]
