# Supplementary material for: Quantitative proteomics reveal proteins enriched in tubular endoplasmic reticulum of Saccharomyces cerevisiae
Source: eLife. 2017 Mar 13;6:e23816. doi: 10.7554/eLife.23816 (PMC5358975; doi:10.7554/eLife.23816)
Supplement: Figure 3—source data 2. — DOI: http://dx.doi.org/10.7554/eLife.23816.008 [file elife-23816-fig3-data2.xlsx]

## Sheet: Sheet1
Table S2-1. Data summary for protein TU:TO ratio measurement
NOTES:
1) Protein ratios reflecting relative changes of the protein levels in the TU sample vs the TO sample were measured from three biological replicates (Rep 1, 2, 3)
2) Average (AVE) and standard deviation (SD) for triplicate ratio measurement are shown.
3) P-values reflect the statistical deviation of individual protein ratios from unity.
Uniprot accession	Protein description	Rep 1	Rep 2	Rep 3	AVE	SD	p-value
P25367	[PIN+] prion protein RNQ1	0.039	0.034	0.057	0.0433333	0.0120968	5.32925e-05
P00445	Superoxide dismutase [Cu-Zn]	0.043	0.039	0.063	0.0483333	0.0128582	6.08457e-05
Q01590	Integral membrane protein SED5	0.043	0.039	0.028	0.0366667	0.00776745	2.16705e-05
P05318	60S acidic ribosomal protein P1-alpha	0.058	0.054	0.448	0.186667	0.22633	0.024854
P05749	60S ribosomal protein L22-A	0.058	0.054	0.034	0.0486667	0.0128582	6.08883e-05
P07991	Ornithine aminotransferase	0.058	0.054	0.043	0.0516667	0.00776745	2.23614e-05
P09064	Eukaryotic translation initiation factor 2 subunit beta	0.058	0.054	0.066	0.0593333	0.0061101	1.40635e-05
P09620	Pheromone-processing carboxypeptidase KEX1	0.058	0.054	0.076	0.0626667	0.0117189	5.20994e-05
P34167	Eukaryotic translation initiation factor 4B	0.058	0.054	0.079	0.0636667	0.0134288	6.85566e-05
P38737	Proteasome component ECM29	0.058	0.054	0.041	0.051	0.00888819	2.92385e-05
P40364	Mitochondrial peculiar membrane protein 1	0.058	0.054	0.089	0.067	0.0191572	0.000140504
P47124	Putative glycosyltransferase HOC1	0.058	0.054	0.257	0.123	0.116065	0.00578757
P53093	Protein YIP4	0.058	0.054	0.054	0.0553333	0.0023094	1.99214e-06
P53163	54S ribosomal protein L12, mitochondrial	0.058	0.054	0.067	0.0596667	0.00665833	1.67122e-05
Q03860	Golgi apparatus membrane protein TVP15	0.058	0.054	0.043	0.0516667	0.00776745	2.23614e-05
Q06287	Ribosomal RNA small subunit methyltransferase NEP1	0.058	0.054	0.085	0.0656667	0.0168622	0.000108551
Q99385	Vacuolar calcium ion transporter	0.058	0.054	0.041	0.051	0.00888819	2.92385e-05
P00359	Glyceraldehyde-3-phosphate dehydrogenase 3	0.078	0.074	0.059	0.0703333	0.0100167	3.86941e-05
P22141	Proteasome subunit beta type-4	0.085	0.078	0.063	0.0753333	0.0112398	4.92486e-05
P00360	Glyceraldehyde-3-phosphate dehydrogenase 1	0.09	0.088	0.081	0.0863333	0.00472582	8.91766e-06
P00924	Enolase 1	0.1	0.093	0.074	0.089	0.0134536	7.26898e-05
Q02642	Nascent polypeptide-associated complex subunit beta-1	0.114	0.234	0.234	0.194	0.069282	0.00245386
P40169	Uncharacterized plasma membrane protein YNL194C	0.116	0.128	0.135	0.126333	0.00960902	4.03199e-05
P38248	Cell wall protein ECM33	0.143	0.139	0.192	0.158	0.0295127	0.000409266
Q3E764	Translation machinery-associated protein 7	0.143	0.139	0.119	0.133667	0.0128582	7.34212e-05
P00560	Phosphoglycerate kinase	0.144	0.147	0.077	0.122667	0.0395769	0.000677629
P22803	Thioredoxin-2	0.157	0.181	0.27	0.202667	0.0595343	0.00185321
P43588	26S proteasome regulatory subunit RPN11	0.158	0.114	0.144	0.138667	0.0224796	0.000226969
P00942	Triosephosphate isomerase	0.16	0.228	0.121	0.169667	0.054151	0.0014147
P48589	40S ribosomal protein S12	0.161	0.168	0.283	0.204	0.0685055	0.00245979
P38013	Peroxiredoxin type-2	0.162	0.17	0.133	0.155	0.0194679	0.000176884
P04912	Histone H2A.2	0.165	0.179	0.25	0.198	0.0455741	0.00107465
Q03973	High mobility group protein 1	0.165	0.142	0.278	0.195	0.0727942	0.00271462
P38116	ADP-ribosylation factor-like protein 1	0.168	0.138	0.022	0.109333	0.077106	0.00248886
P00950	Phosphoglycerate mutase 1	0.17	0.211	0.166	0.182333	0.0249065	0.000309136
P36060	NADH-cytochrome b5 reductase 2	0.174	0.219	0.332	0.241667	0.0814023	0.0038189
P53630	Dethiobiotin synthetase	0.176	0.184	0.226	0.195333	0.0268576	0.000371143
Q12512	Protein ZPS1	0.178	0.123	0.197	0.166	0.0384318	0.000707076
Q99321	Diphosphoinositol polyphosphate phosphohydrolase DDP1	0.179	0.149	0.117	0.148333	0.0310054	0.000441495
P22943	12 kDa heat shock protein	0.185	0.207	0.289	0.227	0.0548088	0.00167159
P23724	Proteasome subunit beta type-6	0.187	0.207	0.224	0.206	0.0185203	0.000181307
P23301	Eukaryotic translation initiation factor 5A-1	0.189	0.191	0.136	0.172	0.0311929	0.000472741
P38142	Probable metabolite transport protein YBR241C	0.189	0.34	0.387	0.305333	0.103452	0.00731174
P05759	Ubiquitin-40S ribosomal protein S31	0.192	0.237	0.265	0.231333	0.0368284	0.000764312
P05739	60S ribosomal protein L6-B	0.198	0.248	0.32	0.255333	0.0613297	0.00225334
P32588	Nuclear and cytoplasmic polyadenylated RNA-binding protein PUB1	0.198	0.268	0.363	0.276333	0.0828151	0.00433698
Q08193	1,3-beta-glucanosyltransferase GAS5	0.2	0.197	0.276	0.224333	0.0447698	0.0011086
Q3E792	40S ribosomal protein S25-A	0.203	0.213	0.121	0.179	0.0504777	0.00125769
P32804	Zinc-regulated transporter 1	0.208	0.25	0.355	0.271	0.0757166	0.0035766
Q12270	Rhomboid protein 2	0.213	0.246	0.364	0.274333	0.0793872	0.00396567
P89886	Translation machinery-associated protein 20	0.218	0.23	0.279	0.242333	0.0323161	0.000605852
P14540	Fructose-bisphosphate aldolase	0.222	0.237	0.265	0.241333	0.0218251	0.000275745
P48836	V-type proton ATPase subunit G	0.222	0.131	0.151	0.168	0.0478226	0.00109947
Q12335	Protoplast secreted protein 2	0.227	0.239	0.161	0.209	0.042	0.000938453
P53184	Nicotinamidase	0.23	0.232	0.233	0.231667	0.00152753	1.31751e-06
P19882	Heat shock protein 60, mitochondrial	0.234	0.224	0.279	0.245667	0.0292973	0.000502436
P87262	60S ribosomal protein L34-A	0.244	0.254	0.287	0.261667	0.0225019	0.000309463
P32471	Elongation factor 1-beta	0.246	0.267	0.281	0.264667	0.0176163	0.000191256
P38788	Ribosome-associated complex subunit SSZ1	0.246	0.248	0.405	0.299667	0.0912268	0.00560852
P38298	Alkaline ceramidase YPC1	0.248	0.189	0.332	0.256333	0.0718633	0.00309824
P06169	Pyruvate decarboxylase isozyme 1	0.249	0.238	0.231	0.239333	0.00907377	4.7428e-05
P53278	Uncharacterized protein YGR130C	0.25	0.337	0.386	0.324333	0.0688791	0.00344619
Q04935	Cytochrome c oxidase protein 20, mitochondrial	0.252	0.203	0.309	0.254667	0.0530503	0.00168444
P41277	(DL)-glycerol-3-phosphatase 1	0.253	0.358	0.507	0.372667	0.127634	0.0135187
P53252	Sphingolipid long chain base-responsive protein PIL1	0.253	0.266	0.225	0.248	0.0209523	0.000258666
P31109	Synaptobrevin homolog 1	0.254	0.165	0.155	0.191333	0.0545008	0.00151064
P53131	Pre-mRNA-splicing factor ATP-dependent RNA helicase PRP43	0.255	0.22	0.19	0.221667	0.032532	0.000581823
P05319	60S acidic ribosomal protein P2-alpha	0.257	0.218	0.372	0.282333	0.0800646	0.00412308
P22804	Protein transport protein BET1	0.258	0.354	0.434	0.348667	0.0881211	0.00604616
P32598	Serine/threonine-protein phosphatase PP1-2	0.258	0.254	0.382	0.298	0.0727736	0.00356309
P00817	Inorganic pyrophosphatase	0.259	0.229	0.365	0.284333	0.0714516	0.00330616
Q12285	Ubiquitin-like protein MDY2	0.261	0.233	0.155	0.216333	0.0549303	0.00163371
P38426	Trehalose synthase complex regulatory subunit TPS3	0.262	0.272	0.372	0.302	0.0608276	0.00252188
P43593	Ubiquitin carboxyl-terminal hydrolase 6	0.266	0.283	0.163	0.237333	0.0649333	0.00240754
P0CX30	40S ribosomal protein S23-B	0.272	0.287	0.316	0.291667	0.0223681	0.000332236
P02994	Elongation factor 1-alpha	0.273	0.327	0.24	0.28	0.0439204	0.00123805
P33328	Synaptobrevin homolog 2	0.274	0.212	0.465	0.317	0.131867	0.0121986
Q12230	Sphingolipid long chain base-responsive protein LSP1	0.286	0.241	0.237	0.254667	0.0272091	0.000443931
P12709	Glucose-6-phosphate isomerase	0.289	0.306	0.321	0.305333	0.0160104	0.000177017
P38911	FK506-binding nuclear protein	0.289	0.373	0.474	0.378667	0.0926301	0.00732723
P05317	60S acidic ribosomal protein P0	0.292	0.285	0.508	0.361667	0.126777	0.0128943
P41056	60S ribosomal protein L33-B	0.295	0.373	0.439	0.369	0.0720833	0.00432182
P39105	Lysophospholipase 1	0.296	0.35	0.491	0.379	0.100683	0.00864853
P05030	Plasma membrane ATPase 1	0.302	0.315	0.267	0.294667	0.0248261	0.000412702
P37267	Assembly factor CBP4	0.302	0.351	0.208	0.287	0.0726705	0.00344483
Q00711	Succinate dehydrogenase [ubiquinone] flavoprotein subunit, mitochondrial	0.304	0.363	0.442	0.369667	0.0692411	0.00399812
P53721	Respiratory supercomplex factor 2, mitochondrial	0.306	0.515	0.499	0.44	0.116323	0.0140794
P02294	Histone H2B.2	0.309	0.368	0.472	0.383	0.0825288	0.00591092
P00549	Pyruvate kinase 1	0.311	0.323	0.241	0.291667	0.0442869	0.00130049
P38736	Golgi SNAP receptor complex member 1	0.316	0.336	0.404	0.352	0.0461303	0.00168501
P40994	ADP-ribosylation factor 3	0.319	0.296	0.479	0.364667	0.0996812	0.0081058
P38754	60S ribosomal protein L14-B	0.324	0.47	0.36	0.384667	0.0760614	0.00505456
P07149	Fatty acid synthase subunit beta	0.326	0.348	0.211	0.295	0.0735731	0.00361062
P04840	Mitochondrial outer membrane protein porin 1	0.33	0.354	0.158	0.280667	0.106908	0.00728241
P36008	Elongation factor 1-gamma 2	0.331	0.322	0.258	0.303667	0.0398037	0.00108738
P69771	Vacuolar protein-sorting-associated protein 46	0.331	0.399	0.307	0.345667	0.0477214	0.00176829
P39015	Suppressor protein STM1	0.337	0.475	0.596	0.469333	0.129593	0.0193054
Q04439	Myosin-5	0.337	0.361	0.548	0.415333	0.115518	0.0127638
P38962	Golgi apparatus membrane protein TVP23	0.354	0.258	0.467	0.359667	0.104615	0.00878024
P46992	Cell wall protein YJL171C	0.354	0.386	0.37	0.37	0.016	0.00021493
P19097	Fatty acid synthase subunit alpha	0.359	0.355	0.286	0.333333	0.0410406	0.00126086
P35691	Translationally-controlled tumor protein homolog	0.36	0.404	0.291	0.351667	0.056959	0.00256292
A5Z2X5	UPF0495 protein YPR010C-A	0.361	0.272	0.227	0.286667	0.0681934	0.00303249
P25580	Protein PBN1	0.361	0.553	0.466	0.46	0.0961405	0.0104013
P10127	Alcohol dehydrogenase 4	0.364	0.37	0.232	0.322	0.078	0.00438274
Q12207	Non-classical export protein 2	0.367	0.375	0.287	0.343	0.0486621	0.00182365
P33421	Succinate dehydrogenase [ubiquinone] cytochrome b subunit, mitochondrial	0.372	0.433	0.297	0.367333	0.06812	0.00384211
Q06485	Autophagy-related protein 33	0.376	0.37	0.276	0.340667	0.0560833	0.00240308
P35719	Uncharacterized protein MRP8	0.377	0.698	0.729	0.601333	0.194896	0.0712544
P02400	60S acidic ribosomal protein P2-beta	0.378	0.397	0.177	0.317333	0.121903	0.0104624
P34240	Zinc-regulated transporter 3	0.381	0.353	0.601	0.445	0.135823	0.0193851
P56508	Protein SNA2	0.385	0.673	0.586	0.548	0.147713	0.0338042
Q12672	60S ribosomal protein L21-B	0.386	0.497	0.588	0.490333	0.101165	0.0128799
P12688	Serine/threonine-protein kinase YPK1	0.389	0.309	0.496	0.398	0.0938243	0.00799983
P32324	Elongation factor 2	0.392	0.411	0.249	0.350667	0.0885569	0.00614289
P32911	Eukaryotic translation initiation factor eIF-1	0.393	0.323	0.204	0.306667	0.0955528	0.00627163
P47154	CAAX prenyl protease 1	0.393	0.397	0.405	0.398333	0.0061101	3.43749e-05
P18414	ER lumen protein retaining receptor	0.397	0.441	0.507	0.448333	0.0553655	0.00334058
P32563	V-type proton ATPase subunit a, vacuolar isoform	0.404	0.377	0.413	0.398	0.018735	0.000322688
Q12029	Probable mitochondrial transport protein FSF1	0.404	0.548	0.663	0.538333	0.12977	0.0253405
Q12306	Ubiquitin-like protein SMT3	0.404	0.354	0.557	0.438333	0.105765	0.0116143
P23644	Mitochondrial import receptor subunit TOM40	0.405	0.432	0.587	0.474667	0.0982157	0.0114515
P0CX50	60S ribosomal protein L18-B	0.41	0.47	0.695	0.525	0.15025	0.0317709
P14832	Peptidyl-prolyl cis-trans isomerase	0.411	0.415	0.411	0.412333	0.0023094	5.14769e-06
Q12513	Translation machinery-associated protein 17	0.411	0.373	0.219	0.334333	0.101673	0.00768676
P11745	Ran GTPase-activating protein 1	0.412	0.408	0.336	0.385333	0.0427707	0.00161006
P36139	Protein PET10	0.414	0.312	0.314	0.346667	0.058321	0.00264565
P0CX44	60S ribosomal protein L1-B	0.416	0.451	0.472	0.446333	0.0282902	0.000869133
P38339	RHO GTPase-activating protein RGD1	0.419	0.484	0.794	0.565667	0.200395	0.0642012
P10591	Heat shock protein SSA1	0.423	0.379	0.234	0.345333	0.0988956	0.00752092
Q04792	Glutamate decarboxylase	0.426	0.429	0.737	0.530667	0.178696	0.0450798
P53834	Hsp90 co-chaperone HCH1	0.428	0.512	0.365	0.435	0.0737496	0.00563145
P05737	60S ribosomal protein L7-A	0.431	0.415	0.399	0.415	0.016	0.000249255
P29547	Elongation factor 1-gamma 1	0.432	0.491	0.308	0.410333	0.0934041	0.0082602
P20424	Signal recognition particle subunit SRP54	0.433	0.691	0.805	0.643	0.190589	0.0833036
P40312	Cytochrome b5	0.433	0.355	0.406	0.398	0.0396106	0.00144002
P07260	Eukaryotic translation initiation factor 4E	0.434	0.402	0.502	0.446	0.0510686	0.0028205
P32379	Proteasome subunit alpha type-5	0.434	0.305	0.311	0.35	0.072808	0.00415619
P40416	Iron-sulfur clusters transporter ATM1, mitochondrial	0.434	0.612	0.51	0.518667	0.0893159	0.0112835
P32867	Protein SSO1	0.437	0.402	0.223	0.354	0.114791	0.0103619
Q3E824	Uncharacterized protein YOR020W-A	0.437	0.25	0.304	0.330333	0.096241	0.00681436
P41920	Ran-specific GTPase-activating protein 1	0.441	0.45	0.28	0.390333	0.0956574	0.00810634
P07259	Protein URA2	0.442	0.434	0.577	0.484333	0.0803513	0.00799637
P38281	Actin patches distal protein 1	0.444	0.434	0.475	0.451	0.0213776	0.000505035
P07560	Ras-related protein SEC4	0.447	0.448	0.874	0.589667	0.24624	0.102002
Q03691	Protein ROT1	0.447	0.557	0.684	0.562667	0.118602	0.023649
Q12117	Protein MRH1	0.447	0.427	0.539	0.471	0.0597327	0.00422313
P04456	60S ribosomal protein L25	0.448	0.511	0.809	0.589333	0.192827	0.0662695
P25349	Flavoprotein-like protein YCP4	0.448	0.421	0.303	0.390667	0.0771125	0.00529611
P32474	Protein disulfide-isomerase EUG1	0.453	0.431	0.447	0.443667	0.0113725	0.000139261
P04807	Hexokinase-2	0.456	0.44	0.318	0.404667	0.0754807	0.00531565
P53228	Transaldolase NQM1	0.457	0.428	0.681	0.522	0.138459	0.0268472
P40056	Golgi to ER traffic protein 2	0.462	0.448	0.301	0.403667	0.0891871	0.00737361
Q12349	ATP synthase subunit H, mitochondrial	0.462	0.541	0.447	0.483333	0.0505008	0.00316947
P53108	Protein YIP5	0.464	0.472	0.355	0.430333	0.0653631	0.00435968
P0C2H7	60S ribosomal protein L27-B	0.466	0.597	0.373	0.478667	0.112536	0.0151793
P23641	Mitochondrial phosphate carrier protein	0.469	0.486	0.606	0.520333	0.0746749	0.00798223
P05755	40S ribosomal protein S9-B	0.471	0.561	0.774	0.602	0.155605	0.0473615
P07264	3-isopropylmalate dehydratase	0.472	0.502	0.424	0.466	0.0393446	0.00180464
P11632	Non-histone chromosomal protein 6A	0.472	0.532	0.554	0.519333	0.0424421	0.00258878
P38711	40S ribosomal protein S27-B	0.474	0.906	0.609	0.663	0.221005	0.118426
P16861	6-phosphofructokinase subunit alpha	0.479	0.434	0.392	0.435	0.0435086	0.00197082
P17255	V-type proton ATPase catalytic subunit A	0.485	0.491	0.323	0.433	0.09531	0.00928766
Q03707	Inner nuclear membrane protein SRC1	0.485	0.394	0.405	0.428	0.0496689	0.00250393
Q96VH5	Mitochondrial organizing structure protein 1	0.485	0.475	0.359	0.439667	0.0700381	0.00516747
P32466	Low-affinity glucose transporter HXT3	0.488	0.477	0.466	0.477	0.011	0.000147423
P00925	Enolase 2	0.491	0.537	0.577	0.535	0.0430349	0.00284288
P32861	UTP--glucose-1-phosphate uridylyltransferase	0.493	0.464	0.582	0.513	0.0614898	0.00527209
P32836	GTP-binding nuclear protein GSP2/CNR2	0.494	0.391	0.643	0.509333	0.126698	0.0215106
P35725	Uncharacterized protein YKL063C	0.496	0.304	0.514	0.438	0.116396	0.0139987
P20107	Zinc/cadmium resistance protein	0.499	0.445	0.577	0.507	0.0663626	0.00598576
P22214	Protein transport protein SEC22	0.499	0.521	0.408	0.476	0.0599083	0.00432875
P35180	Mitochondrial import receptor subunit TOM20	0.5	0.63	0.772	0.634	0.136044	0.0430994
P16521	Elongation factor 3A	0.503	0.412	0.346	0.420333	0.078831	0.00610834
Q12447	Polyamine N-acetyltransferase 1	0.503	0.714	0.919	0.712	0.208007	0.138622
Q05022	rRNA biogenesis protein RRP5	0.504	0.506	0.721	0.577	0.124712	0.0277729
P04050	DNA-directed RNA polymerase II subunit RPB1	0.507	0.42	0.299	0.408667	0.104462	0.0102428
P0CX40	40S ribosomal protein S8-B	0.507	0.611	0.742	0.62	0.117758	0.0305513
P53549	26S protease subunit RPT4	0.508	0.439	0.408	0.451667	0.0511892	0.0028924
P0CX48	40S ribosomal protein S11-B	0.51	0.307	0.484	0.433667	0.110464	0.0124454
P02309	Histone H4	0.513	0.362	0.661	0.512	0.149503	0.0298894
P53206	Putative cysteine synthase	0.516	0.731	0.444	0.563667	0.14932	0.0368903
P22217	Thioredoxin-1	0.517	0.327	0.592	0.478667	0.136596	0.0221267
P07273	Transcription elongation factor S-II	0.519	0.515	0.687	0.573667	0.0981699	0.0172189
P40989	1,3-beta-glucan synthase component GSC2	0.527	0.48	0.576	0.527667	0.0480035	0.00342524
Q00764	Alpha,alpha-trehalose-phosphate synthase [UDP-forming] 56 kDa subunit	0.527	0.628	0.258	0.471	0.191251	0.0409136
P07143	Cytochrome c1, heme protein, mitochondrial	0.529	0.832	0.473	0.611333	0.193143	0.0733714
P23291	Casein kinase I homolog 1	0.531	0.394	0.625	0.516667	0.116165	0.0187158
P41940	Mannose-1-phosphate guanyltransferase	0.537	0.497	0.225	0.419667	0.169768	0.0273605
P32473	Pyruvate dehydrogenase E1 component subunit beta, mitochondrial	0.54	0.609	0.496	0.548333	0.056959	0.00525934
P39939	40S ribosomal protein S26-B	0.54	0.584	0.841	0.655	0.162576	0.0667002
P46985	Probable alpha-1,6-mannosyltransferase MNN11	0.541	0.616	0.722	0.626333	0.0909414	0.0191778
P0CX36	40S ribosomal protein S4-B	0.546	0.654	1.063	0.754333	0.272713	0.259064
Q02795	Dolichyl-diphosphooligosaccharide--protein glycosyltransferase subunit SWP1	0.547	0.432	0.651	0.543333	0.109546	0.0186463
P53220	Mitochondrial import inner membrane translocase subunit TIM21	0.548	0.812	0.754	0.704667	0.138742	0.0663292
Q05785	Epsin-2	0.555	0.399	0.463	0.472333	0.0784177	0.00728155
P26785	60S ribosomal protein L16-B	0.559	0.458	0.365	0.460667	0.0970275	0.0106168
P27809	Glycolipid 2-alpha-mannosyltransferase	0.56	0.557	0.395	0.504	0.0944087	0.011862
P33333	Probable 1-acyl-sn-glycerol-3-phosphate acyltransferase	0.56	0.713	0.909	0.727333	0.174941	0.114186
P38703	Sphingosine N-acyltransferase LAG1	0.56	0.573	0.774	0.635667	0.119976	0.0342982
Q02326	60S ribosomal protein L6-A	0.561	0.661	0.313	0.511667	0.179168	0.0420606
P00330	Alcohol dehydrogenase 1	0.562	0.646	0.659	0.622333	0.052653	0.00641669
P13586	Calcium-transporting ATPase 1	0.565	0.669	0.64	0.624667	0.0536687	0.00674644
P34222	Peptidyl-tRNA hydrolase 2	0.569	0.628	0.599	0.598667	0.0295014	0.00179631
P32486	Beta-glucan synthesis-associated protein KRE6	0.57	0.556	0.435	0.520333	0.0742316	0.00788887
P38234	Protein RFS1	0.57	0.545	0.504	0.539667	0.0333217	0.00174201
Q07551	NADPH-dependent alpha-keto amide reductase	0.576	0.523	0.658	0.585667	0.0680172	0.00886363
P38631	1,3-beta-glucan synthase component FKS1	0.581	0.527	0.323	0.477	0.136074	0.0218282
Q12025	Uncharacterized protein YDR056C	0.581	0.844	0.951	0.792	0.190402	0.199008
P54839	Hydroxymethylglutaryl-CoA synthase	0.584	0.614	0.696	0.631333	0.057977	0.00814315
P08539	Guanine nucleotide-binding protein alpha-1 subunit	0.585	0.536	0.505	0.542	0.0403361	0.00257546
P31116	Homoserine dehydrogenase	0.585	0.536	0.47	0.530333	0.057709	0.00499486
P17967	Protein disulfide-isomerase	0.594	0.55	0.36	0.501333	0.12436	0.0201077
P37291	Serine hydroxymethyltransferase, cytosolic	0.6	0.658	0.407	0.555	0.131412	0.0278597
P09624	Dihydrolipoyl dehydrogenase, mitochondrial	0.601	0.573	0.844	0.672667	0.149038	0.0626758
P25294	Protein SIS1	0.605	0.554	0.888	0.682333	0.179929	0.0923624
P04806	Hexokinase-1	0.607	1.063	0.881	0.850333	0.229542	0.37599
P11484	Heat shock protein SSB1	0.609	0.609	0.918	0.712	0.178401	0.107645
P38355	Uncharacterized transporter YBR287W	0.613	1.095	0.875	0.861	0.241305	0.423528
P25373	Glutaredoxin-1	0.614	0.778	0.937	0.776333	0.161506	0.138573
Q12125	Golgi to ER traffic protein 4	0.617	0.545	0.51	0.557333	0.0545558	0.00502486
P07245	C-1-tetrahydrofolate synthase, cytoplasmic	0.621	0.67	0.598	0.629667	0.0367741	0.00327071
Q12305	Thiosulfate sulfurtransferase RDL1, mitochondrial	0.621	0.652	0.808	0.693667	0.100221	0.0338763
Q00055	Glycerol-3-phosphate dehydrogenase [NAD(+)] 1	0.623	0.632	0.627	0.627333	0.00450925	4.87994e-05
P23292	Casein kinase I homolog 2	0.624	0.61	0.656	0.63	0.0235797	0.00135104
P47176	Branched-chain-amino-acid aminotransferase, cytosolic	0.624	0.695	0.38	0.566333	0.165228	0.0451368
Q03798	Altered inheritance of mitochondria protein 36, mitochondrial	0.624	0.825	0.646	0.698333	0.110247	0.0417516
P25045	Serine palmitoyltransferase 1	0.626	0.831	0.76	0.739	0.104101	0.0491514
P04147	Polyadenylate-binding protein, cytoplasmic and nuclear	0.629	0.633	0.974	0.745333	0.198041	0.155797
P28321	Monoglyceride lipase	0.629	0.634	0.791	0.684667	0.0921213	0.0272893
Q04062	26S proteasome regulatory subunit RPN9	0.631	0.502	0.516	0.549667	0.0707837	0.0081349
P32288	Glutamine synthetase	0.634	0.552	0.541	0.575667	0.0508167	0.00474653
P53221	60S ribosomal protein L26-B	0.635	1.35	1.095	1.02667	0.362365	0.910234
P41805	60S ribosomal protein L10	0.636	0.62	0.594	0.616667	0.0211975	0.00101773
P50094	Inosine-5'-monophosphate dehydrogenase 4	0.637	0.353	0.548	0.512667	0.14526	0.0283614
P17555	Adenylyl cyclase-associated protein	0.64	1.036	0.719	0.798333	0.209581	0.237512
P32468	Cell division control protein 12	0.646	0.549	0.441	0.545333	0.102549	0.0165378
P00358	Glyceraldehyde-3-phosphate dehydrogenase 2	0.647	0.455	0.337	0.479667	0.156465	0.0288429
P24000	60S ribosomal protein L24-B	0.647	0.882	0.934	0.821	0.152915	0.17981
P25361	Uncharacterized protein YCR043C	0.647	0.987	0.806	0.813333	0.170119	0.197739
P40319	Elongation of fatty acids protein 3	0.648	0.719	0.646	0.671	0.0415812	0.00528239
P38845	Cruciform DNA-recognizing protein 1	0.654	0.507	0.333	0.498	0.160689	0.0324984
Q12133	Signal peptidase complex subunit SPC3	0.654	0.408	0.455	0.505667	0.130592	0.0224819
P31539	Heat shock protein 104	0.655	0.664	0.959	0.759333	0.172975	0.137541
P15303	Protein transport protein SEC23	0.657	0.513	0.439	0.536333	0.110857	0.0185265
P04449	60S ribosomal protein L24-A	0.663	0.757	0.631	0.683667	0.065493	0.0139891
P54003	Protein SUR7	0.667	0.793	0.658	0.706	0.0754785	0.0212715
P48563	Protein MON2	0.669	0.73	0.664	0.687667	0.0367469	0.00458237
P0C0V8	40S ribosomal protein S21-A	0.675	0.375	0.588	0.546	0.154347	0.0364343
P36006	Myosin-3	0.676	0.49	0.638	0.601333	0.0982717	0.019659
P06780	GTP-binding protein RHO1	0.678	0.705	0.383	0.588667	0.178623	0.0574917
P39007	Dolichyl-diphosphooligosaccharide--protein glycosyltransferase subunit STT3	0.683	0.48	0.804	0.655667	0.16372	0.0677848
P38998	Saccharopine dehydrogenase [NAD(+), L-lysine-forming]	0.685	0.523	0.408	0.538667	0.139163	0.0290179
P47089	Translation machinery-associated protein 22	0.686	0.589	0.54	0.605	0.0743034	0.0115905
P25694	Cell division control protein 48	0.688	0.714	0.979	0.793667	0.161029	0.156666
Q06405	ATP synthase subunit f, mitochondrial	0.689	0.698	0.783	0.723333	0.0518684	0.0115138
P35176	Peptidyl-prolyl cis-trans isomerase D	0.693	0.814	0.597	0.701333	0.10874	0.0414574
Q05521	Diacylglycerol pyrophosphate phosphatase 1	0.693	0.84	0.856	0.796333	0.0898462	0.0591701
P16474	78 kDa glucose-regulated protein homolog	0.695	0.623	0.643	0.653667	0.0371663	0.00381678
Q04491	Protein transport protein SEC13	0.696	0.711	0.986	0.797667	0.163274	0.164959
Q08959	Phosphatidylglycerol phospholipase C	0.697	0.631	0.526	0.618	0.086238	0.0165673
P46784	40S ribosomal protein S10-B	0.698	0.74	1.141	0.859667	0.244545	0.424987
P48558	Bax inhibitor 1	0.698	0.758	0.659	0.705	0.0498698	0.00939201
Q04013	Mitochondrial DNA replication protein YHM2	0.702	0.59	0.762	0.684667	0.0873002	0.0246096
P05743	60S ribosomal protein L26-A	0.704	0.697	1.008	0.803	0.17757	0.194607
P32795	Mitochondrial inner membrane i-AAA protease supercomplex subunit YME1	0.704	0.586	0.814	0.701333	0.114023	0.0453077
P39010	Palmitoyltransferase AKR1	0.704	0.666	0.858	0.742667	0.101673	0.0482964
Q03048	Cofilin	0.704	0.64	0.751	0.698333	0.0557165	0.0111805
P50085	Prohibitin-2	0.705	0.718	0.498	0.640333	0.123436	0.0370902
P05748	60S ribosomal protein L15-A	0.709	0.834	0.802	0.781667	0.0649333	0.0282402
P38295	Medium-chain fatty acid ethyl ester synthase/esterase 2	0.709	0.691	1.212	0.870667	0.29574	0.527853
P03965	Carbamoyl-phosphate synthase arginine-specific large chain	0.711	0.806	0.584	0.700333	0.111384	0.0430965
P38226	Uncharacterized acyltransferase CST26	0.711	1.204	1.18	1.03167	0.277965	0.861812
P40548	HSP70 co-chaperone SNL1	0.711	0.658	1.074	0.814333	0.226434	0.291398
Q05050	Eisosome protein 1	0.714	0.782	0.649	0.715	0.0665056	0.0176715
P00128	Cytochrome b-c1 complex subunit 7	0.715	0.604	0.706	0.675	0.0616523	0.0117837
O14467	Multiprotein-bridging factor 1	0.716	0.814	0.842	0.790667	0.0661614	0.0317216
P01120	Ras-like protein 2	0.716	0.684	0.651	0.683667	0.0325013	0.0035003
Q99297	Mitochondrial 2-oxodicarboxylate carrier 2	0.716	1.03	0.834	0.86	0.158606	0.265905
P26321	60S ribosomal protein L5	0.717	0.897	0.741	0.785	0.0977343	0.0624931
P00931	Tryptophan synthase	0.719	0.765	0.768	0.750667	0.0274651	0.00402028
P49723	Ribonucleoside-diphosphate reductase small chain 2	0.726	0.565	0.962	0.751	0.199677	0.163382
P07283	Phosphomannomutase	0.729	0.58	0.44	0.583	0.144523	0.0377843
P32803	Endosomal protein P24B	0.731	0.62	1.006	0.785667	0.198722	0.202696
P38764	26S proteasome regulatory subunit RPN1	0.731	0.869	1.197	0.932333	0.239369	0.672833
P40482	Protein transport protein SEC24	0.731	1.075	1.291	1.03233	0.282428	0.861145
P60010	Actin	0.731	0.767	0.551	0.683	0.115724	0.0416661
P16387	Pyruvate dehydrogenase E1 component subunit alpha, mitochondrial	0.732	0.774	0.703	0.736333	0.0356978	0.00605471
P20449	ATP-dependent RNA helicase DBP5	0.734	0.727	0.977	0.812667	0.14236	0.15028
P46964	Dolichyl-diphosphooligosaccharide--protein glycosyltransferase subunit OST2	0.734	0.972	0.518	0.741333	0.227089	0.187242
P15703	Glucan 1,3-beta-glucosidase	0.735	0.682	0.803	0.74	0.0606548	0.0176618
Q06505	Transcription factor SPN1	0.737	0.878	0.856	0.823667	0.0758573	0.0565102
P34760	Peroxiredoxin TSA1	0.74	0.674	0.404	0.606	0.178022	0.061809
P05374	Phosphatidylethanolamine N-methyltransferase	0.747	0.537	0.674	0.652667	0.106613	0.0299995
P53319	6-phosphogluconate dehydrogenase, decarboxylating 2	0.753	0.781	1.122	0.885333	0.205437	0.435657
P25618	Protein CWH43	0.757	0.571	0.574	0.634	0.106532	0.027098
P16862	6-phosphofructokinase subunit beta	0.759	0.767	0.993	0.839667	0.132851	0.171744
P47818	Protein CCC1	0.759	0.951	1.186	0.965333	0.213861	0.80527
Q3E7X9	40S ribosomal protein S28-A	0.76	0.663	0.44	0.621	0.164082	0.0571721
Q12233	ATP synthase subunit g, mitochondrial	0.761	1.084	0.712	0.852333	0.20212	0.333184
P29952	Mannose-6-phosphate isomerase	0.762	0.655	0.859	0.758667	0.102041	0.0547449
P19073	Cell division control protein 42	0.764	0.847	0.555	0.722	0.150463	0.0853316
P04801	Threonine--tRNA ligase, cytoplasmic	0.767	0.703	0.539	0.669667	0.117598	0.0397436
P32857	Membrane protein PTM1	0.767	0.884	0.492	0.714333	0.201237	0.133161
P46655	Glutamate--tRNA ligase, cytoplasmic	0.769	0.771	0.616	0.718667	0.0889176	0.0317216
P02829	ATP-dependent molecular chaperone HSP82	0.773	0.631	0.458	0.620667	0.157754	0.0530997
P32915	Protein transport protein SEC61	0.773	0.843	0.897	0.837667	0.0621718	0.0455768
P38286	Very-long-chain 3-oxoacyl-CoA reductase	0.773	0.78	0.653	0.735333	0.0713886	0.0234035
P13663	Aspartate-semialdehyde dehydrogenase	0.774	0.655	0.547	0.658667	0.113544	0.0349623
P32340	Rotenone-insensitive NADH-ubiquinone oxidoreductase, mitochondrial	0.776	0.875	1.11	0.920333	0.171553	0.505614
P40341	Mitochondrial respiratory chain complexes assembly protein YTA12	0.777	1.001	1.297	1.025	0.260829	0.883411
Q00245	GTP-binding protein RHO3	0.778	1.103	0.931	0.937333	0.162593	0.573126
P36051	GPI ethanolamine phosphate transferase 1	0.78	0.718	0.802	0.766667	0.0435584	0.0114178
Q00955	Acetyl-CoA carboxylase	0.785	0.779	0.501	0.688333	0.162263	0.0796999
P19955	37S ribosomal protein YMR-31, mitochondrial	0.786	1.294	1.338	1.13933	0.306785	0.513897
P32891	D-lactate dehydrogenase [cytochrome] 1, mitochondrial	0.786	0.658	0.751	0.731667	0.0661539	0.0196644
P38081	Uncharacterized glycosyl hydrolase YBR056W	0.794	0.802	0.655	0.750333	0.0826579	0.0346487
O74700	Mitochondrial import inner membrane translocase subunit TIM9	0.795	0.556	0.621	0.657333	0.123573	0.04072
P39925	Mitochondrial respiratory chain complexes assembly protein AFG3	0.795	1.159	1.226	1.06	0.231929	0.697957
P39727	ER-derived vesicles protein ERV46	0.796	0.997	1.088	0.960333	0.149413	0.690786
P23254	Transketolase 1	0.798	0.629	0.628	0.685	0.0978621	0.0306989
Q07825	Putative Xaa-Pro aminopeptidase FRA1	0.798	0.7	0.613	0.703667	0.0925545	0.0310125
Q12434	Rho GDP-dissociation inhibitor	0.798	0.531	0.635	0.654667	0.134582	0.0470798
P21825	Translocation protein SEC62	0.801	1.016	0.701	0.839333	0.160961	0.22597
P40581	Peroxiredoxin HYR1	0.803	0.621	0.603	0.675667	0.110641	0.03667
P38720	6-phosphogluconate dehydrogenase, decarboxylating 1	0.804	0.781	0.511	0.698667	0.16293	0.0851842
P80967	Mitochondrial import receptor subunit TOM5	0.807	0.578	0.509	0.631333	0.155995	0.0548189
P33775	Dolichyl-phosphate-mannose--protein mannosyltransferase 1	0.808	0.922	1.226	0.985333	0.216077	0.917154
P40471	NADPH-dependent 1-acyldihydroxyacetone phosphate reductase	0.812	0.536	1.011	0.786333	0.238538	0.260961
P32419	Malate dehydrogenase, peroxisomal	0.815	0.958	0.879	0.884	0.071631	0.107076
P38221	Phosphatidate cytidylyltransferase	0.815	0.79	0.854	0.819667	0.0322542	0.0104959
P47068	Myosin tail region-interacting protein MTI1	0.816	0.826	0.856	0.832667	0.0208167	0.00511907
P39004	High-affinity hexose transporter HXT6	0.817	0.751	0.762	0.776667	0.0353601	0.00825269
P34227	Mitochondrial peroxiredoxin PRX1	0.821	1.341	1.027	1.063	0.261863	0.71736
P0CX42	60S ribosomal protein L23-B	0.822	0.615	0.824	0.753667	0.120093	0.0709032
P33754	Translocation protein SEC66	0.823	0.572	0.867	0.754	0.159145	0.115775
P36112	Formation of crista junctions protein 1	0.825	0.868	0.554	0.749	0.170238	0.125184
P39107	Mannan polymerase complexes subunit MNN9	0.828	0.594	0.878	0.766667	0.151609	0.116618
P47912	Long-chain-fatty-acid--CoA ligase 4	0.829	0.658	0.648	0.711667	0.101737	0.0390828
P22855	Alpha-mannosidase	0.832	0.928	0.819	0.859667	0.0595343	0.0550819
P38701	40S ribosomal protein S20	0.835	0.744	0.675	0.751333	0.0802517	0.0330084
Q12445	Nucleoporin POM34	0.836	0.584	0.797	0.739	0.135643	0.0794495
P07263	Histidine--tRNA ligase, mitochondrial	0.839	0.84	0.599	0.759333	0.138854	0.0953532
P38130	Probable mannosyltransferase KTR3	0.84	0.815	0.774	0.809667	0.0333217	0.0100626
P40215	External NADH-ubiquinone oxidoreductase 1, mitochondrial	0.84	0.804	1.486	1.04333	0.383783	0.863016
P32602	Alpha-soluble NSF attachment protein	0.843	0.951	0.944	0.912667	0.0604345	0.129361
P40515	Mitochondria fission 1 protein	0.846	0.835	1.16	0.947	0.184545	0.66819
Q04969	Signal peptidase complex subunit SPC2	0.847	0.833	0.831	0.837	0.0087178	0.000952131
P46989	Autophagy-related protein 27	0.849	0.736	0.726	0.770333	0.0683106	0.0282455
P0CX24	60S ribosomal protein L20-B	0.85	0.909	1.256	1.005	0.219365	0.972095
P35844	Protein KES1	0.85	0.679	0.849	0.792667	0.0984395	0.0676098
P40303	Proteasome subunit alpha type-4	0.852	0.748	0.78	0.793333	0.0532666	0.0214342
P53691	Peptidyl-prolyl cis-trans isomerase CPR6	0.855	0.525	0.664	0.681333	0.165681	0.079508
P41543	Dolichyl-diphosphooligosaccharide--protein glycosyltransferase subunit 1	0.858	1.481	1.366	1.235	0.331516	0.344418
P31382	Dolichyl-phosphate-mannose--protein mannosyltransferase 2	0.86	1.034	1.018	0.970667	0.0961735	0.650066
P52910	Acetyl-coenzyme A synthetase 2	0.862	1.065	0.791	0.906	0.142201	0.370765
P25560	Protein RER1	0.864	0.686	0.73	0.76	0.0927146	0.0463166
P38875	GPI transamidase component GPI16	0.864	1.102	0.657	0.874333	0.22268	0.431423
P20606	Small COPII coat GTPase SAR1	0.867	0.652	0.641	0.72	0.127424	0.0626203
P10592	Heat shock protein SSA2	0.873	0.758	0.721	0.784	0.0792654	0.042076
P07342	Acetolactate synthase catalytic subunit, mitochondrial	0.875	1.006	1.244	1.04167	0.187068	0.736822
Q05567	Sphingosine-1-phosphate lyase	0.877	1.071	0.855	0.934333	0.118867	0.439619
P00425	Cytochrome c oxidase polypeptide 5B, mitochondrial	0.878	1.035	0.78	0.897667	0.128633	0.302141
P0CX83	60S ribosomal protein L19-B	0.88	0.589	0.653	0.707333	0.152919	0.0802071
P15019	Transaldolase	0.88	0.747	0.66	0.762333	0.110799	0.0654168
P39109	Metal resistance protein YCF1	0.883	0.837	0.804	0.841333	0.0396779	0.0202152
P09232	Cerevisin	0.886	0.98	0.725	0.863667	0.128959	0.208563
P32527	Zuotin	0.887	1.055	1.146	1.02933	0.131394	0.73626
P38250	Increased sodium tolerance protein 2	0.892	0.932	1.456	1.09333	0.314715	0.658606
P21375	Osmotic growth protein 1	0.893	1.129	1.276	1.09933	0.193216	0.467175
P20081	FK506-binding protein 1	0.894	1.066	0.632	0.864	0.21855	0.393839
P23639	Proteasome subunit alpha type-2	0.898	0.731	1.152	0.927	0.211993	0.611403
P22336	Replication factor A protein 1	0.905	1.204	1.581	1.23	0.338749	0.360619
P09938	Ribonucleoside-diphosphate reductase small chain 1	0.913	0.819	0.871	0.867667	0.0470886	0.0397088
Q04458	Fatty aldehyde dehydrogenase HFD1	0.913	0.905	1.036	0.951333	0.0734325	0.369787
P07251	ATP synthase subunit alpha, mitochondrial	0.916	0.952	1.057	0.975	0.0732598	0.614379
P10659	S-adenosylmethionine synthase 1	0.925	0.913	1.119	0.985667	0.115626	0.849897
P33297	26S protease regulatory subunit 6A	0.929	0.771	0.921	0.873667	0.0890019	0.133177
P52871	Protein transport protein SBH2	0.934	1.239	1.639	1.27067	0.353565	0.316026
Q01855	40S ribosomal protein S15	0.934	1.553	1.177	1.22133	0.311872	0.343982
P26784	60S ribosomal protein L16-A	0.938	0.927	0.669	0.844667	0.152231	0.219204
P32332	Mitochondrial oxaloacetate transport protein	0.939	0.759	1.152	0.95	0.196731	0.702791
P38219	Obg-like ATPase 1	0.943	1.046	0.736	0.908333	0.157881	0.420485
Q04067	Eukaryotic translation initiation factor 3 subunit G	0.946	0.838	0.866	0.883333	0.0560476	0.0690567
P07170	Adenylate kinase	0.948	0.882	1.173	1.001	0.152568	0.991973
P34248	Probable intramembrane protease YKL100C	0.949	1.152	1.24	1.11367	0.149239	0.317884
Q3E754	40S ribosomal protein S21-B	0.95	0.955	0.846	0.917	0.0615386	0.144542
P24280	SEC14 cytosolic factor	0.952	0.859	0.854	0.888333	0.0551936	0.0726695
Q12154	ATPase GET3	0.953	0.953	1.529	1.145	0.332554	0.528945
P38314	Protein SDS24	0.959	1.001	0.908	0.956	0.0465725	0.243401
P14904	Vacuolar aminopeptidase 1	0.96	1.083	0.784	0.942333	0.150281	0.574664
P48439	Dolichyl-diphosphooligosaccharide--protein glycosyltransferase subunit 3	0.96	1.118	1.397	1.15833	0.221274	0.340913
P51401	60S ribosomal protein L9-B	0.961	1.074	0.805	0.946667	0.135072	0.564642
P05453	Eukaryotic peptide chain release factor GTP-binding subunit	0.964	0.903	1.532	1.133	0.346888	0.574951
P40150	Heat shock protein SSB2	0.964	0.82	0.757	0.847	0.106108	0.129825
P46672	GU4 nucleic-binding protein 1	0.965	0.944	0.91	0.939667	0.0277549	0.0638585
P40531	Protein GVP36	0.967	1.041	0.892	0.966667	0.0745006	0.519442
P53903	Processing of GAS1 and ALP protein 2	0.969	0.879	0.829	0.892333	0.070946	0.119368
Q03559	Uncharacterized protein YMR295C	0.975	1.614	1.271	1.28667	0.319788	0.260702
Q08822	Probable electron transfer flavoprotein-ubiquinone oxidoreductase, mitochondrial	0.977	1.44	1.301	1.23933	0.23758	0.223132
P0C2H9	60S ribosomal protein L31-B	0.983	0.926	0.812	0.907	0.0870689	0.205534
P23642	Mannan polymerase I complex VAN1 subunit	0.983	0.765	0.667	0.805	0.161753	0.17203
P38695	Probable glucose transporter HXT5	0.986	1.012	1.031	1.00967	0.0225906	0.535807
P39968	Vacuolar protein 8	0.987	0.837	0.743	0.855667	0.123066	0.179301
P41338	Acetyl-CoA acetyltransferase	0.992	1.035	1.599	1.20867	0.338722	0.397707
Q01560	Nucleolar protein 3	0.992	0.84	1.002	0.944667	0.0907818	0.401793
P00830	ATP synthase subunit beta, mitochondrial	0.993	1.093	1.232	1.106	0.120029	0.26574
P15891	Actin-binding protein	0.994	1.017	0.919	0.976667	0.0512478	0.512972
P32352	C-8 sterol isomerase	0.996	1.152	1.491	1.213	0.253075	0.28225
P18962	Dipeptidyl aminopeptidase B	0.997	1.102	0.781	0.96	0.163667	0.713245
P53730	Dol-P-Man:Man(7)GlcNAc(2)-PP-Dol alpha-1,6-mannosyltransferase	1	0.842	0.678	0.84	0.161009	0.227357
Q3E772	Uncharacterized protein YGR169C-A	1	1.137	0.602	0.913	0.277908	0.642002
P32386	ATP-dependent bile acid permease	1.002	0.72	1.193	0.971667	0.237954	0.855696
P38199	Heterogeneous nuclear rnp K-like protein 2	1.01	0.785	1.387	1.06067	0.304181	0.76271
P17695	Glutaredoxin-2, mitochondrial	1.011	1.124	1.16	1.09833	0.0777453	0.159851
P0CX46	60S ribosomal protein L2-B	1.013	1.232	0.724	0.989667	0.254803	0.950393
P18759	Vesicular-fusion protein SEC18	1.018	0.947	1.529	1.16467	0.317513	0.463842
P28496	Sphingosine N-acyltransferase LAC1	1.019	1.21	0.936	1.055	0.140503	0.567688
P32481	Eukaryotic translation initiation factor 2 subunit gamma	1.019	1.527	0.943	1.163	0.317515	0.467728
Q12450	Protein ERP4	1.024	1.286	1.042	1.11733	0.146347	0.299366
P38431	Eukaryotic translation initiation factor 5	1.025	1.199	0.925	1.04967	0.138655	0.598254
P53633	Prenylated Rab acceptor 1	1.029	0.644	0.846	0.839667	0.192578	0.286038
P39931	Protein SSP120	1.03	0.902	0.521	0.817667	0.264772	0.35528
P40483	Putative zinc metalloproteinase YIL108W	1.043	0.918	1.024	0.995	0.0673573	0.909459
Q06508	Lysophosphatidic acid:oleoyl-CoA acyltransferase 1	1.044	1.04	1.312	1.132	0.155897	0.280167
P32621	Guanosine-diphosphatase	1.047	1.048	1.174	1.08967	0.0730365	0.167334
Q04338	t-SNARE VTI1	1.048	1.292	0.822	1.054	0.235057	0.729155
P38626	NADH-cytochrome b5 reductase 1	1.049	1.356	0.866	1.09033	0.247601	0.592045
P07284	Serine--tRNA ligase, cytoplasmic	1.053	0.97	0.526	0.849667	0.283359	0.455144
P32457	Cell division control protein 3	1.058	0.859	0.834	0.917	0.122748	0.362173
P50095	Inosine-5'-monophosphate dehydrogenase 3	1.058	0.922	1.498	1.15933	0.301074	0.4561
Q08954	Smr domain-containing protein YPL199C	1.058	1.543	1.282	1.29433	0.242735	0.170521
P32939	GTP-binding protein YPT7	1.06	1.012	1.388	1.15333	0.20464	0.323869
P21306	ATP synthase subunit epsilon, mitochondrial	1.063	1.034	1.069	1.05533	0.0187172	0.0360885
P32335	Protein MSS51, mitochondrial	1.063	1.156	1.168	1.129	0.0574717	0.0602449
P53337	ER-derived vesicles protein ERV29	1.063	0.788	1.429	1.09333	0.321575	0.665064
P25087	Sterol 24-C-methyltransferase	1.064	0.753	1.105	0.974	0.192486	0.836787
P30902	ATP synthase subunit d, mitochondrial	1.069	0.882	0.782	0.911	0.145681	0.40091
P29311	Protein BMH1	1.074	0.998	1.312	1.128	0.163817	0.30861
P20485	Choline kinase	1.081	1.172	1.204	1.15233	0.0638148	0.0538181
P36081	Uncharacterized protein YKL077W	1.081	0.914	0.981	0.992	0.0840417	0.8842
P38353	Sec sixty-one protein homolog	1.082	1.105	0.805	0.997333	0.166962	0.980442
Q08179	Mitochondrial distribution and morphology protein 38	1.082	0.703	1.119	0.968	0.230241	0.832193
P40582	Glutathione S-transferase 1	1.083	1.281	1.087	1.15033	0.113178	0.148081
P32449	Phospho-2-dehydro-3-deoxyheptonate aldolase, tyrosine-inhibited	1.084	1.411	1.197	1.23067	0.166079	0.13793
P46982	Alpha-1,2-mannosyltransferase MNN5	1.084	0.811	1.14	1.01167	0.176024	0.919091
P14906	Protein translocation protein SEC63	1.089	0.898	0.839	0.942	0.130679	0.522414
P39101	Protein CAJ1	1.09	1.016	0.816	0.974	0.141746	0.780812
Q03532	ATP-dependent RNA helicase HAS1	1.091	1.252	1.84	1.39433	0.394264	0.225349
P17649	4-aminobutyrate aminotransferase	1.092	0.788	1.129	1.003	0.187112	0.980367
P22146	1,3-beta-glucanosyltransferase GAS1	1.103	0.675	0.627	0.801667	0.262064	0.320206
Q05892	Uncharacterized protein YLR290C, mitochondrial	1.109	1.216	0.741	1.022	0.249165	0.892488
Q04228	UBX domain-containing protein 2	1.111	1.54	2.027	1.55933	0.458306	0.168854
P25340	Delta(24(24(1)))-sterol reductase	1.112	0.777	0.985	0.958	0.169124	0.709011
P39078	T-complex protein 1 subunit delta	1.118	1.128	1.572	1.27267	0.259278	0.210123
P40098	Uncharacterized mitochondrial membrane protein FMP10	1.122	0.714	0.821	0.885667	0.211547	0.448038
P32843	Mitochondrial escape protein 2	1.135	1.861	1.688	1.56133	0.379213	0.124373
Q06144	Protein ORM2	1.138	0.876	0.782	0.932	0.184488	0.588556
Q08144	T-SNARE affecting a late Golgi compartment protein 2	1.139	0.838	0.944	0.973667	0.152677	0.79332
P39958	Rab GDP-dissociation inhibitor	1.142	1.063	0.891	1.032	0.128339	0.707938
P10614	Lanosterol 14-alpha demethylase	1.145	1.276	1.512	1.311	0.185987	0.101402
Q12363	Transcriptional modulator WTM1	1.146	1.09	1.212	1.14933	0.0610683	0.0514774
P38256	Uncharacterized protein YBR096W	1.149	0.945	1.469	1.18767	0.264131	0.343554
P0CS90	Heat shock protein SSC1, mitochondrial	1.151	1.82	1.215	1.39533	0.369162	0.204775
P38694	Putative aldehyde dehydrogenase-like protein YHR039C	1.151	1.253	0.692	1.032	0.298833	0.869964
P36018	GTP-binding protein YPT52	1.154	1.052	1.105	1.10367	0.0510131	0.0720964
P06634	ATP-dependent RNA helicase DED1	1.157	1.253	1.022	1.144	0.116047	0.164624
Q12220	U3 small nucleolar RNA-associated protein 12	1.157	1.546	1.163	1.28867	0.222877	0.154065
P40024	ABC transporter ATP-binding protein ARB1	1.159	1.014	1.245	1.13933	0.116749	0.17467
P80210	Adenylosuccinate synthetase	1.159	0.981	1.54	1.22667	0.285577	0.302968
P23638	Proteasome subunit alpha type-3	1.164	1.093	0.786	1.01433	0.200904	0.912953
P40540	ER membrane protein complex subunit 5	1.165	1.341	1.732	1.41267	0.290214	0.132799
P06633	Imidazoleglycerol-phosphate dehydratase	1.169	1.204	0.723	1.032	0.268173	0.855392
P33767	Dolichyl-diphosphooligosaccharide--protein glycosyltransferase subunit WBP1	1.169	1.263	0.88	1.104	0.199602	0.462061
Q08972	[NU+] prion formation protein 1	1.173	1.092	0.713	0.992667	0.245561	0.963449
P39685	Nucleoporin POM152	1.176	0.926	0.794	0.965333	0.194014	0.78622
P39742	Translocation protein SEC72	1.176	1.496	1.571	1.41433	0.209782	0.0758553
P38910	10 kDa heat shock protein, mitochondrial	1.183	0.98	1.082	1.08167	0.1015	0.298104
P16603	NADPH--cytochrome P450 reductase	1.184	1.255	0.678	1.039	0.314644	0.849913
P38166	Protein transport protein SFT2	1.193	1.033	1.54	1.25533	0.259184	0.230069
Q02776	Mitochondrial import inner membrane translocase subunit TIM50	1.201	0.955	0.791	0.982333	0.206362	0.895721
Q07651	SUR7 family protein FMP45	1.202	1.268	1.127	1.199	0.0705479	0.0394316
P40413	T-complex protein 1 subunit epsilon	1.206	1.462	0.747	1.13833	0.362271	0.576369
P39940	E3 ubiquitin-protein ligase RSP5	1.207	1.47	1.05	1.24233	0.212218	0.186552
P16140	V-type proton ATPase subunit B	1.217	1.14	0.957	1.10467	0.133553	0.307526
P53868	Alpha-1,2-mannosyltransferase ALG9	1.233	1.481	1.136	1.28333	0.177922	0.110149
P0CX32	40S ribosomal protein S24-B	1.237	1.295	1.121	1.21767	0.0885965	0.0510335
P32582	Cystathionine beta-synthase	1.241	1.345	1.614	1.4	0.192486	0.0692656
Q03362	Uncharacterized protein YDR476C	1.243	1.308	0.899	1.15	0.219789	0.358674
P39076	T-complex protein 1 subunit beta	1.249	1.716	1.494	1.48633	0.233594	0.0690333
P16550	Protein APA1	1.255	1.501	0.748	1.168	0.383965	0.527669
P05738	60S ribosomal protein L9-A	1.26	1.101	1.266	1.209	0.0935788	0.0607951
P38088	Glycine--tRNA ligase 1, mitochondrial	1.266	1.355	0.938	1.18633	0.219619	0.279459
Q07478	ATP-dependent RNA helicase SUB2	1.268	1.059	1.322	1.21633	0.138904	0.114332
P25371	Probable ATP-dependent permease	1.275	0.797	1.362	1.14467	0.304214	0.496719
P53731	Actin-related protein 2/3 complex subunit 2	1.277	1.468	0.989	1.24467	0.241131	0.22092
P38755	Oxysterol-binding protein homolog 7	1.278	0.879	0.981	1.046	0.20729	0.737729
P53878	Uncharacterized oxidoreductase YNL181W	1.288	1.11	0.969	1.12233	0.159857	0.316154
P41811	Coatomer subunit beta'	1.294	0.981	0.922	1.06567	0.199931	0.6268
P26755	Replication factor A protein 3	1.295	1.187	0.894	1.12533	0.207491	0.405261
P14164	ARS-binding factor 1	1.296	1.674	0.983	1.31767	0.346009	0.25276
P32319	Vacuolar protein sorting/targeting protein VPS10	1.299	1.379	0.967	1.215	0.218467	0.230392
P26637	Leucine--tRNA ligase, cytoplasmic	1.3	0.881	0.662	0.947667	0.324183	0.806042
P05694	5-methyltetrahydropteroyltriglutamate--homocysteine methyltransferase	1.303	0.988	1.095	1.12867	0.160176	0.298685
P49626	60S ribosomal protein L4-B	1.304	1.24	0.744	1.096	0.306516	0.641858
P11633	Non-histone chromosomal protein 6B	1.305	1.252	1.592	1.383	0.182929	0.0683379
P38137	Peroxisomal-coenzyme A synthetase	1.305	1.527	1.054	1.29533	0.236648	0.163186
P33298	26S protease regulatory subunit 6B homolog	1.316	1.424	0.937	1.22567	0.255758	0.266037
P40212	60S ribosomal protein L13-B	1.318	1.238	1.461	1.339	0.112973	0.0350831
P37012	Phosphoglucomutase-2	1.32	1.341	0.733	1.13133	0.345127	0.577566
P40517	Ran-specific GTPase-activating protein 2	1.325	1.247	0.815	1.129	0.274714	0.501455
P06197	CDP-diacylglycerol--inositol 3-phosphatidyltransferase	1.326	1.286	1.381	1.331	0.047697	0.00685052
P32589	Heat shock protein homolog SSE1	1.331	1.41	1.293	1.34467	0.0596853	0.00984832
P33892	Translational activator GCN1	1.331	1.148	1.183	1.22067	0.0971408	0.058943
P32500	Nucleoporin NDC1	1.337	1.945	1.666	1.64933	0.304342	0.0660538
P40553	Peroxiredoxin DOT5	1.338	1.527	0.818	1.22767	0.367152	0.395194
Q05359	Protein ERP1	1.33889	1.48349	1.34925	1.39054	0.0806613	0.0139229
P11655	Guanine nucleotide-exchange factor SEC12	1.342	1.194	1.412	1.316	0.111301	0.0389527
Q12213	60S ribosomal protein L7-B	1.344	1.591	0.84	1.25833	0.382759	0.362879
P22203	V-type proton ATPase subunit E	1.349	1.11	0.736	1.065	0.308968	0.75049
P22137	Clathrin heavy chain	1.358	1.238	0.84	1.14533	0.271148	0.451224
P53925	Uncharacterized vacuolar membrane protein YNL115C	1.359	1.069	1.67	1.366	0.300561	0.169426
P32916	Signal recognition particle receptor subunit alpha homolog	1.36	0.802	1.05	1.07067	0.279573	0.704273
P00958	Methionine--tRNA ligase, cytoplasmic	1.361	1.376	1.626	1.45433	0.148857	0.0339694
P40557	ER-retained PMA1-suppressing protein 1	1.3646	2.222	2.139	1.90853	0.472885	0.0796625
P40959	Sorting nexin MVP1	1.368	1.02	1.125	1.171	0.178502	0.238932
P53141	Myosin light chain 1	1.37	1.141	0.813	1.108	0.279962	0.572814
P46971	Dolichyl-phosphate-mannose--protein mannosyltransferase 4	1.375	1.181	0.941	1.16567	0.217406	0.317705
P47075	Vacuolar transporter chaperone 4	1.379	0.8	0.909	1.02933	0.307685	0.884026
Q03529	Ceramide very long chain fatty acid hydroxylase SCS7	1.379	1.254	1.648	1.427	0.201338	0.0667724
P35179	Protein transport protein SSS1	1.38	1.36	0.974	1.238	0.228849	0.213448
P19262	Dihydrolipoyllysine-residue succinyltransferase component of 2-oxoglutarate dehydrogenase complex, mitochondrial	1.381	1.326	1.136	1.281	0.12855	0.0632171
P06738	Glycogen phosphorylase	1.384	1.089	1.319	1.264	0.155	0.0982598
P21147	Acyl-CoA desaturase 1	1.396	1.143	0.677	1.072	0.36472	0.764993
P05375	Phosphatidyl-N-methylethanolamine N-methyltransferase	1.407	0.908	1.084	1.133	0.253083	0.458784
P35191	DnaJ homolog 1, mitochondrial	1.408	1.379	1.106	1.29767	0.16662	0.0904894
P23248	40S ribosomal protein S1-B	1.419	1.355	1.318	1.364	0.0510979	0.00650473
P39986	Probable cation-transporting ATPase 1	1.427	1.309	0.94	1.22533	0.254052	0.264274
P53192	Golgi to ER traffic protein 1	1.431	1.258	1.473	1.38733	0.113958	0.0276617
P06103	Eukaryotic translation initiation factor 3 subunit B	1.432	0.945	1.286	1.221	0.249922	0.265297
P38817	ADP-ribosylation factor-binding protein GGA2	1.433	1.93	1.919	1.76067	0.283821	0.0434073
P14742	Glutamine--fructose-6-phosphate aminotransferase [isomerizing]	1.464	1.396	0.816	1.22533	0.35612	0.387452
P32835	GTP-binding nuclear protein GSP1/CNR1	1.465	0.928	1.288	1.227	0.273648	0.287315
Q99316	Protein disulfide isomerase MPD2	1.467	0.949	1.194	1.20333	0.259126	0.307077
P36095	Vacuolar protein-sorting-associated protein 24	1.468	1.406	0.98	1.28467	0.265664	0.204602
Q03434	Transposon Ty1-ML2 Gag-Pol polyprotein	1.468	1.294	1.508	1.42333	0.113778	0.0232422
P32629	Mannan polymerase II complex ANP1 subunit	1.472	1.197	0.71	1.12633	0.385884	0.627837
P07257	Cytochrome b-c1 complex subunit 2, mitochondrial	1.474	1.728	1.079	1.427	0.327043	0.152139
P25623	Suppressor of yeast profilin deletion	1.476	1.242	1.076	1.26467	0.200961	0.150084
P47082	Vacuolar amino acid transporter 1	1.477	1.664	1.771	1.63733	0.148803	0.0176899
P40527	Probable phospholipid-transporting ATPase NEO1	1.48	1.331	0.94	1.25033	0.278891	0.260263
P15705	Heat shock protein STI1	1.486	1.143	1.207	1.27867	0.182385	0.118035
P31412	V-type proton ATPase subunit C	1.486	1.744	1.611	1.61367	0.129021	0.0144165
P38627	CTP synthase 2	1.489	1.964	1.313	1.58867	0.33675	0.0939607
P27514	Low-affinity phosphate transporter PHO91	1.49	1.2	1.28	1.32333	0.149778	0.0646664
Q99190	Very-long-chain enoyl-CoA reductase	1.519	1.339	1.002	1.28667	0.262443	0.199041
P28274	CTP synthase 1	1.535	1.551	1.158	1.41467	0.222424	0.0839981
P41810	Coatomer subunit beta	1.535	1.148	1.332	1.33833	0.193578	0.093988
P32366	V-type proton ATPase subunit d	1.547	1.248	0.911	1.23533	0.318189	0.328654
P17709	Glucokinase-1	1.549	1.535	0.966	1.35	0.332627	0.209956
P40030	Ergosterol biosynthetic protein 28	1.55	1.565	1.421	1.512	0.0791644	0.0078749
P38131	Probable mannosyltransferase KTR4	1.562	1.233	1.406	1.40033	0.164573	0.0519788
Q08045	Long chronological lifespan protein 2	1.567	1.128	1.612	1.43567	0.267395	0.105979
P47079	T-complex protein 1 subunit theta	1.573	1.595	1.439	1.53567	0.0844354	0.00818057
P36421	Tyrosine--tRNA ligase, cytoplasmic	1.585	1.059	0.894	1.17933	0.360874	0.480096
P09457	ATP synthase subunit 5, mitochondrial	1.586	1.462	1.367	1.47167	0.10982	0.0175949
P06168	Ketol-acid reductoisomerase, mitochondrial	1.601	1.339	1.42	1.45333	0.134143	0.0279677
P47035	Nucleolar protein NET1	1.608	1.056	2.119	1.59433	0.531632	0.19245
Q06252	Uncharacterized protein YLR179C	1.625	1.051	1.037	1.23767	0.335514	0.34468
P16622	Ferrochelatase, mitochondrial	1.643	1.028	1.997	1.556	0.490323	0.188485
P10080	Single-stranded nucleic acid-binding protein	1.648	1.119	1.682	1.483	0.315691	0.117769
Q04493	Prefoldin subunit 5	1.657	1.574	1.121	1.45067	0.2885	0.113761
P04173	3-isopropylmalate dehydrogenase	1.667	1.438	1.418	1.50767	0.138349	0.0238726
P21576	Vacuolar protein sorting-associated protein 1	1.697	1.809	1.39	1.632	0.216931	0.0371006
P32381	Actin-related protein 2	1.745	1.75	1.222	1.57233	0.303408	0.0822809
P53622	Coatomer subunit alpha	1.758	1.551	1.223	1.51067	0.269771	0.0817753
Q03558	NADPH dehydrogenase 2	1.801	1.785	1.057	1.54767	0.425005	0.155292
P00815	Histidine biosynthesis trifunctional protein	1.853	1.975	1.641	1.823	0.169009	0.0137675
P14907	Nucleoporin NSP1	1.868	1.416	1.823	1.70233	0.248991	0.0394332
P25491	Mitochondrial protein import protein MAS5	1.887	1.916	1.573	1.792	0.190213	0.0186896
P42945	U3 small nucleolar RNA-associated protein 10	1.904	1.756	2.351	2.00367	0.309768	0.0303157
P07281	40S ribosomal protein S19-B	1.909	1.888	2.528	2.10833	0.363594	0.0340515
Q12464	RuvB-like protein 2	1.943	2.302	1.998	2.081	0.193357	0.0104971
P32660	Phospholipid-transporting ATPase DNF1	1.944	1.917	3.335	2.39867	0.811001	0.0961754
Q12159	RNA annealing protein YRA1	1.96	2.632	2.256	2.28267	0.336793	0.0222184
P07262	NADP-specific glutamate dehydrogenase 1	1.996	2.109	1.696	1.93367	0.213439	0.0169775
P48570	Homocitrate synthase, cytosolic isozyme	2.004	2.579	2.248	2.277	0.288595	0.0166017
P25343	Reduced viability upon starvation protein 161	2.01	2.878	3.547	2.81167	0.770644	0.055355
P39516	40S ribosomal protein S14-B	2.016	2.091	2.1	2.069	0.0461194	0.00061985
Q03690	Clustered mitochondria protein 1	2.022	2.219	2.34	2.19367	0.160506	0.00597301
Q3E7Y3	40S ribosomal protein S22-B	2.027	2.724	3.454	2.735	0.713564	0.0520221
P02406	60S ribosomal protein L28	2.034	2.581	2.972	2.529	0.471157	0.030224
P32802	Transmembrane 9 superfamily member 1	2.042	2.027	2.432	2.167	0.229619	0.0126603
P40217	Eukaryotic translation initiation factor 3 subunit I	2.046	2.143	3.265	2.48467	0.677527	0.0629359
P0CX56	40S ribosomal protein S18-B	2.052	2.537	3.398	2.66233	0.681697	0.051744
P32356	Neutral trehalase	2.055	2.317	1.621	1.99767	0.351524	0.0389791
P38077	ATP synthase subunit gamma, mitochondrial	2.058	2.204	2.384	2.21533	0.163295	0.00596398
P38427	Trehalose synthase complex regulatory subunit TSL1	2.065	2.101	2.39	2.18533	0.178158	0.00744624
P53898	Protein NSG2	2.065	2.114	2.884	2.35433	0.459359	0.0362734
Q07657	Seventh homolog of septin 1	2.068	2.709	3.196	2.65767	0.565749	0.0367026
P43535	Protein GCN20	2.07	3.489	2.913	2.824	0.713674	0.0474293
Q08548	Lysophospholipid acyltransferase	2.071	3.409	2.121	2.53367	0.758473	0.0727425
P12385	Eukaryotic peptide chain release factor subunit 1	2.075	2.027	2.744	2.282	0.400823	0.0310735
P35845	Oxysterol-binding protein homolog 1	2.075	2.526	2.487	2.36267	0.249889	0.0110246
P37296	V-type proton ATPase subunit a, Golgi isoform	2.075	2.301	2.124	2.16667	0.118888	0.0034436
P07703	DNA-directed RNA polymerases I and III subunit RPAC1	2.08	2.093	2.381	2.18467	0.170154	0.00680641
P43603	LAS seventeen-binding protein 3	2.083	2.236	2.515	2.278	0.219041	0.00965041
Q03648	Uncharacterized protein YMR209C	2.085	2.092	2.879	2.352	0.456409	0.0359509
P34216	EH domain-containing and endocytosis protein 1	2.087	2.377	2.304	2.256	0.150841	0.00477331
P05756	40S ribosomal protein S13	2.092	2.339	4.054	2.82833	1.06862	0.0975017
P25303	DnaJ-related protein SCJ1	2.097	1.922	1.255	1.758	0.444312	0.097985
Q12032	Altered inheritance of mitochondria protein 41, mitochondrial	2.1	2.864	2.007	2.32367	0.470247	0.0395887
P36148	Glycerol-3-phosphate O-acyltransferase 2	2.101	2.644	1.868	2.20433	0.398186	0.0345604
P08566	Pentafunctional AROM polypeptide	2.118	3.048	2.86	2.67533	0.491733	0.0275361
Q12211	tRNA pseudouridine synthase 1	2.119	2.035	2.372	2.17533	0.17542	0.00734366
P15108	ATP-dependent molecular chaperone HSC82	2.124	2.713	2.189	2.342	0.322935	0.0187606
P34730	Protein BMH2	2.127	2.174	3.083	2.46133	0.538892	0.0424633
P54115	Magnesium-activated aldehyde dehydrogenase, cytosolic	2.128	2.072	2.598	2.266	0.288881	0.0169168
P06105	Protein SCP160	2.135	2.547	2.785	2.489	0.328859	0.0158734
P22202	Heat shock protein SSA4	2.142	2.318	2.308	2.256	0.0988534	0.00205845
P38428	Coupling of ubiquitin conjugation to ER degradation protein 1	2.142	2.11	2.469	2.24033	0.198676	0.00844435
P35723	Endoplasmic reticulum transmembrane protein 1	2.144	2.269	2.894	2.43567	0.401819	0.0251314
P39929	Vacuolar-sorting protein SNF7	2.152	2.771	2.051	2.32467	0.389821	0.0276739
P36010	Nucleoside diphosphate kinase	2.156	2.479	2.082	2.239	0.211114	0.00953937
P38069	Alpha-1,2-mannosyltransferase MNN2	2.16	2.15	2.522	2.27733	0.211947	0.00905303
P0CX85	60S ribosomal protein L35-B	2.169	2.101	2.454	2.24133	0.187287	0.00750252
P32565	26S proteasome regulatory subunit RPN2	2.171	2.493	2.443	2.369	0.173286	0.00529829
P53075	Sensitivity to high expression protein 10	2.175	2.362	2.851	2.46267	0.349062	0.0184602
P01123	GTP-binding protein YPT1	2.18	2.716	2.556	2.484	0.275158	0.0112665
P12695	Dihydrolipoyllysine-residue acetyltransferase component of pyruvate dehydrogenase complex, mitochondrial	2.182	2.599	2.164	2.315	0.246116	0.0114757
P53073	ER membrane protein complex subunit 4	2.182	2.128	2.695	2.335	0.312936	0.0178275
P53860	Phosphatidylinositol transfer protein PDR16	2.19	2.997	1.666	2.28433	0.670496	0.0800862
P39954	Adenosylhomocysteinase	2.2	2.288	2.634	2.374	0.229425	0.00916611
P21242	Probable proteasome subunit alpha type-7	2.211	2.315	1.369	1.965	0.518764	0.0843247
P07278	cAMP-dependent protein kinase regulatory subunit	2.213	2.183	1.933	2.10967	0.153731	0.00633688
P06787	Calmodulin	2.222	2.877	2.493	2.53067	0.329121	0.0150635
P25555	Single-strand telomeric DNA-binding protein GBP2	2.226	2.513	2.4	2.37967	0.144576	0.0036404
P28007	H/ACA ribonucleoprotein complex subunit 1	2.234	1.834	2.171	2.07967	0.215073	0.0129705
P47008	Phosphatidylinositol transfer protein SFH5	2.234	2.543	2.24	2.339	0.176695	0.00575444
P21954	Isocitrate dehydrogenase [NADP], mitochondrial	2.244	2.463	2.312	2.33967	0.112091	0.00232545
P10622	60S acidic ribosomal protein P1-beta	2.246	2.215	2.102	2.18767	0.0757914	0.00135471
P22147	5'-3' exoribonuclease 1	2.246	3.191	3.074	2.837	0.515153	0.0252263
Q02785	ATP-dependent permease PDR12	2.249	2.362	2.051	2.22067	0.157424	0.00549836
P18562	Uracil phosphoribosyltransferase	2.251	2.097	1.88	2.076	0.186389	0.00985461
P32368	Phosphoinositide phosphatase SAC1	2.27	2.46	3.028	2.586	0.394396	0.0199966
P40528	Protein SYG1	2.274	3.264	2.584	2.70733	0.506392	0.0280937
P40008	Protein FMP52, mitochondrial	2.277	2.516	2.378	2.39033	0.119976	0.00247297
P46654	40S ribosomal protein S0-B	2.282	2.463	2.115	2.28667	0.174047	0.00604405
Q04697	Glucose-signaling factor 2	2.282	2.877	2.516	2.55833	0.29975	0.0121097
P27614	Carboxypeptidase S	2.283	2.505	1.998	2.262	0.254152	0.0132509
P38689	Ribose-phosphate pyrophosphokinase 3	2.297	2.38	1.8	2.159	0.313661	0.0235545
Q05948	Uncharacterized SVF1-like protein YLR225C	2.301	2.921	1.93	2.384	0.500687	0.0409634
P15992	Heat shock protein 26	2.306	2.262	2.848	2.472	0.326368	0.0159941
P32445	Single-stranded DNA-binding protein RIM1, mitochondrial	2.308	2.281	1.774	2.121	0.300814	0.0231719
P34237	Protein CASP	2.313	2.112	2.311	2.24533	0.115474	0.00285375
P05740	60S ribosomal protein L17-A	2.333	3.225	2.513	2.69033	0.4717	0.0249888
P32583	Suppressor protein SRP40	2.334	2.547	1.841	2.24067	0.362136	0.0272443
Q99260	GTP-binding protein YPT6	2.349	2.848	1.932	2.37633	0.458611	0.0350746
P25567	RNA-binding protein SRO9	2.355	2.393	2.671	2.473	0.172522	0.00454149
P47133	ER membrane protein complex subunit 2	2.358	2.65	3.189	2.73233	0.421574	0.0191748
Q07878	Vacuolar protein sorting-associated protein 13	2.371	2.52	2.819	2.57	0.228147	0.0069655
P22517	Calcium/calmodulin-dependent protein kinase II	2.377	1.389	1.734	1.83333	0.501434	0.102472
P32528	Urea amidolyase	2.402	2.642	1.985	2.343	0.33245	0.0198206
Q6Q547	H/ACA ribonucleoprotein complex subunit 3	2.407	3.24	1.837	2.49467	0.705596	0.0669151
P0CX54	60S ribosomal protein L12-B	2.412	2.74	3.485	2.879	0.549839	0.0273761
P38934	Nuclear segregation protein BFR1	2.414	2.665	2.495	2.52467	0.128103	0.00234486
Q05123	Actin-like protein ARP9	2.416	2.22	2.282	2.306	0.10018	0.00195559
P22696	Peptidyl-prolyl cis-trans isomerase ESS1	2.42	2.332	1.605	2.119	0.447306	0.0493535
P15625	Phenylalanine--tRNA ligase alpha subunit	2.425	2.496	2.247	2.38933	0.128274	0.00282944
Q03640	Tricalbin-3	2.432	2.603	2.066	2.367	0.274337	0.0131605
P14126	60S ribosomal protein L3	2.437	3.504	2.06	2.667	0.748972	0.0611783
P39743	Reduced viability upon starvation protein 167	2.441	2.097	2.199	2.24567	0.176684	0.0066394
P53174	Pheromone-regulated membrane protein 8	2.442	2.58	2.907	2.643	0.238816	0.00696901
P07244	Bifunctional purine biosynthetic protein ADE5,7	2.448	3.26	2.307	2.67167	0.514366	0.0301396
P38061	60S ribosomal protein L32	2.451	2.072	2.213	2.24533	0.191558	0.00779481
P39704	Protein ERP2	2.455	3.808	3.107	3.12333	0.676648	0.0322235
Q05775	Eukaryotic translation initiation factor 3 subunit J	2.466	2.751	2.333	2.51667	0.213556	0.00654401
Q07451	Endoplasmic reticulum transmembrane protein 3	2.473	2.827	1.966	2.422	0.43276	0.0295127
Q06705	Phosphatidylinositol transfer protein CSR1	2.476	2.774	1.674	2.308	0.568918	0.057661
P43616	Cys-Gly metallodipeptidase DUG1	2.479	1.28	1.242	1.667	0.703469	0.242242
P14120	60S ribosomal protein L30	2.483	2.706	4.352	3.18033	1.0208	0.0659229
P15646	rRNA 2'-O-methyltransferase fibrillarin	2.488	2.126	2.816	2.47667	0.34514	0.017727
Q12690	60S ribosomal protein L13-A	2.49	3.241	4.006	3.24567	0.758011	0.0359435
P38775	Putative uncharacterized protein YHR045W	2.493	2.725	1.639	2.28567	0.571917	0.0600783
P16451	Pyruvate dehydrogenase complex protein X component, mitochondrial	2.496	2.046	2.162	2.23467	0.233635	0.0117264
P20967	2-oxoglutarate dehydrogenase, mitochondrial	2.507	2.254	2.627	2.46267	0.190411	0.00560158
Q3E757	60S ribosomal protein L11-B	2.508	2.867	2.687	2.68733	0.1795	0.00375109
Q12746	Plasma membrane-associated coenzyme Q6 reductase PGA3	2.515	2.275	2.683	2.491	0.205056	0.00624576
P51996	GTP-binding protein YPT32/YPT11	2.521	3.011	1.927	2.48633	0.542831	0.0416994
P47160	Epsin-3	2.533	2.651	3.087	2.757	0.291815	0.00907006
P27810	Alpha-1,2 mannosyltransferase KTR1	2.542	2.728	2.009	2.42633	0.373195	0.0220671
P18239	ADP,ATP carrier protein 2	2.55	2.222	3.281	2.68433	0.542129	0.0328409
P43636	Alpha-1,3/1,6-mannosyltransferase ALG2	2.563	2.943	1.616	2.374	0.683391	0.0734861
P38555	GTP-binding protein YPT31/YPT8	2.567	3.121	2.589	2.759	0.313694	0.0104357
P0CX26	60S ribosomal protein L43-B	2.576	2.678	2.2	2.48467	0.251749	0.00944856
P12612	T-complex protein 1 subunit alpha	2.589	1.789	2.593	2.32367	0.463039	0.0384529
P48236	Uncharacterized membrane protein YGR149W	2.589	2.067	2.269	2.30833	0.263213	0.0132244
Q05812	Meiotic sister-chromatid recombination protein 3	2.589	3.021	2.048	2.55267	0.487516	0.0313265
P49334	Mitochondrial import receptor subunit TOM22	2.594	2.331	2.462	2.46233	0.1315	0.00268465
P38715	NADPH-dependent aldose reductase GRE3	2.6	2.683	2.045	2.44267	0.346881	0.0187314
Q03940	RuvB-like protein 1	2.6	2.463	1.489	2.184	0.605773	0.0772772
P54837	Endoplasmic reticulum vesicle protein 25	2.618	4.857	4.313	3.92933	1.16777	0.0491039
P39079	T-complex protein 1 subunit zeta	2.639	2.31	1.905	2.28467	0.367655	0.0262316
P30624	Long-chain-fatty-acid--CoA ligase 1	2.64	3.397	2.026	2.68767	0.686742	0.0510079
P53723	UPF0674 endoplasmic reticulum membrane protein YNR021W	2.649	2.321	2.778	2.58267	0.235611	0.0073065
P28625	Protein YIM1	2.656	2.818	1.999	2.491	0.433715	0.0270656
P61830	Histone H3	2.673	2.502	2.486	2.55367	0.103655	0.00148039
P43558	Ubiquitin thioesterase OTU1	2.681	2.708	1.982	2.457	0.411584	0.0255833
P36017	Vacuolar protein sorting-associated protein 21	2.688	2.852	1.858	2.466	0.53289	0.0413325
P05750	40S ribosomal protein S3	2.693	2.59	2.223	2.502	0.247049	0.00889768
P25365	Putative guanine nucleotide-exchange factor SED4	2.705	3.504	1.736	2.64833	0.885361	0.0841998
P0C2H8	60S ribosomal protein L31-A	2.71	2.473	2.096	2.42633	0.309649	0.0153492
Q12466	Tricalbin-1	2.714	2.858	1.911	2.49433	0.510287	0.036741
P48606	Tubulin-specific chaperone A	2.72	2.487	2.054	2.42033	0.337968	0.0183553
Q02457	Protein TBF1	2.724	2.406	2.927	2.68567	0.262607	0.00799311
Q04767	Golgi apparatus membrane protein TVP18	2.727	3.227	3.243	3.06567	0.293403	0.00665784
Q02486	ARS-binding factor 2, mitochondrial	2.733	4.385	4.72	3.946	1.06376	0.0408185
P10081	ATP-dependent RNA helicase eIF4A	2.735	2.232	2.234	2.40033	0.289832	0.0139806
P43609	Chromatin structure-remodeling complex protein RSC8	2.744	3.297	1.792	2.611	0.761264	0.0670341
Q04080	GPI transamidase component GPI17	2.773	2.686	2.205	2.55467	0.305929	0.0126629
P53040	Transcription initiation factor TFIID subunit 6	2.782	2.465	4.037	3.09467	0.831334	0.0487013
P38177	Uncharacterized protein YBL086C	2.788	2.622	2.097	2.50233	0.360708	0.0186791
Q12078	Iron transporter SMF3	2.808	2.282	2.44	2.51	0.269896	0.0104821
P30657	Proteasome subunit beta type-7	2.822	2.812	3.214	2.94933	0.229263	0.00457912
P43555	Protein EMP47	2.843	2.222	2.668	2.57767	0.320204	0.0134545
P53199	Sterol-4-alpha-carboxylate 3-dehydrogenase, decarboxylating	2.848	3.434	4.551	3.611	0.865187	0.0347062
P07267	Saccharopepsin	2.858	3.866	2.152	2.95867	0.861423	0.0588417
Q12406	Actin-related protein 7	2.858	4.346	3.056	3.42	0.808027	0.035211
P46956	Inorganic phosphate transporter PHO86	2.859	2.42	2.188	2.489	0.34078	0.0170154
P26783	40S ribosomal protein S5	2.868	2.73	2.645	2.74767	0.112545	0.00137947
P38079	Protein YRO2	2.873	2.988	1.61	2.49033	0.764556	0.0776466
P46990	60S ribosomal protein L17-B	2.874	2.927	2.438	2.74633	0.268336	0.00777844
Q12329	Heat shock protein 42	2.877	2.31	2.375	2.52067	0.3103	0.0135971
P09733	Tubulin alpha-1 chain	2.887	3.939	3.399	3.40833	0.526062	0.0155348
P40327	26S protease regulatory subunit 4 homolog	2.918	2.944	1.698	2.52	0.711992	0.0659814
P49167	60S ribosomal protein L38	2.936	2.939	3.152	3.009	0.123851	0.00126442
Q12460	Nucleolar protein 56	2.942	2.762	3.581	3.095	0.430403	0.0137788
P32597	Nuclear protein STH1/NPS1	2.949	2.425	4.367	3.247	1.00471	0.060644
P04786	DNA topoisomerase 1	2.958	2.274	2.225	2.48567	0.409786	0.0244344
Q07541	Uncharacterized protein YDL121C	2.959	3.104	2.125	2.72933	0.528366	0.0297356
Q12010	Uncharacterized membrane protein YOL092W	2.968	3.063	2.553	2.86133	0.271216	0.00700296
Q12451	Oxysterol-binding protein homolog 2	2.982	2.219	2.788	2.663	0.396561	0.0184322
P13185	Serine/threonine protein kinase KIN1	3.001	3.02	2.447	2.82267	0.325476	0.0104627
P39517	ATP-dependent RNA helicase DHH1	3.005	2.802	3.627	3.14467	0.429868	0.0131284
P42943	T-complex protein 1 subunit eta	3.02	2.901	2.592	2.83767	0.220917	0.00478277
Q99287	Protein SEY1	3.036	3.442	4.324	3.60067	0.658496	0.020709
P32458	Cell division control protein 11	3.05	2.623	2.633	2.76867	0.243693	0.00626866
P40075	Vesicle-associated membrane protein-associated protein SCS2	3.055	3.853	5.135	4.01433	1.04934	0.0381016
P43585	Vacuolar transporter chaperone 2	3.056	3.506	2.134	2.89867	0.699401	0.0423764
P38230	Probable quinone oxidoreductase	3.064	3.458	3.156	3.226	0.206116	0.00284575
Q12109	Tryptophan--tRNA ligase, cytoplasmic	3.101	4.591	6.261	4.651	1.58085	0.057186
P0CX52	40S ribosomal protein S16-B	3.109	3.545	2.258	2.97067	0.654557	0.0348628
P25342	Cell division control protein 10	3.115	3.015	4.164	3.43133	0.636475	0.0220889
P26786	40S ribosomal protein S7-A	3.115	3.44	2.515	3.02333	0.469264	0.0174616
P48164	40S ribosomal protein S7-B	3.121	3.021	2.181	2.77433	0.516269	0.0270792
Q06833	Uncharacterized PH domain-containing protein YPR091C	3.128	3.765	5.328	4.07367	1.13201	0.0423614
P25443	40S ribosomal protein S2	3.15	2.957	3.039	3.04867	0.0968624	0.000744324
P24783	ATP-dependent RNA helicase DBP2	3.155	3.454	2.521	3.04333	0.476418	0.0176427
P02557	Tubulin beta chain	3.18	3.184	3.646	3.33667	0.267898	0.00435293
P08456	CDP-diacylglycerol--serine O-phosphatidyltransferase	3.221	3.008	2.063	2.764	0.616355	0.0383683
P48231	Tricalbin-2	3.233	2.903	3.769	3.30167	0.437064	0.011807
P0C0W9	60S ribosomal protein L11-A	3.252	3.273	2.257	2.92733	0.580621	0.0289447
P17076	60S ribosomal protein L8-A	3.276	4.746	2.848	3.62333	0.995531	0.0448029
P08524	Farnesyl pyrophosphate synthase	3.283	4.719	3.343	3.78167	0.812309	0.0272683
P38011	Guanine nucleotide-binding protein subunit beta-like protein	3.298	3.065	3.766	3.37633	0.357005	0.00743951
P38687	Signal recognition particle subunit SRP68	3.302	2.025	2.934	2.75367	0.657322	0.0437794
P40970	Serine palmitoyltransferase 2	3.322	4.255	3.212	3.59633	0.573067	0.0158542
P21243	Proteasome subunit alpha type-1	3.348	3.906	3.284	3.51267	0.342136	0.00612356
P38167	Protein ECM21	3.35	6.01	5.224	4.86133	1.36658	0.0393066
P0CX38	40S ribosomal protein S6-B	3.398	3.873	2.703	3.32467	0.588437	0.0206971
P40533	Protein TED1	3.398	4.221	3.582	3.73367	0.431954	0.00822019
P07213	Mitochondrial import receptor subunit TOM70	3.436	2.971	2.524	2.977	0.45603	0.0172775
P25574	ER membrane protein complex subunit 1	3.442	3.438	2.693	3.191	0.431285	0.0126709
P54783	D-arabinono-1,4-lactone oxidase	3.473	2.521	2.678	2.89067	0.510388	0.0234406
P15367	Signal peptidase complex catalytic subunit SEC11	3.487	3.969	2.411	3.289	0.797649	0.0381745
P38929	Calcium-transporting ATPase 2	3.528	3.995	2.047	3.19	1.01703	0.0649622
P32191	Glycerol-3-phosphate dehydrogenase, mitochondrial	3.584	3.116	3.428	3.376	0.238294	0.00333606
P38999	Saccharopine dehydrogenase [NADP(+), L-glutamate-forming]	3.637	3.686	3.171	3.498	0.284248	0.00428833
P32590	Heat shock protein homolog SSE2	3.642	2.667	2.522	2.94367	0.609105	0.031211
P14020	Dolichol-phosphate mannosyltransferase	3.651	3.771	4.771	4.06433	0.614925	0.0131587
P25619	30 kDa heat shock protein	3.655	3.678	3.01	3.44767	0.379205	0.00790584
P39524	Probable phospholipid-transporting ATPase DRS2	3.661	3.093	4.89	3.88133	0.918538	0.032246
P17891	Clathrin light chain	3.667	3.176	3.354	3.399	0.248574	0.00355964
P38778	Manganese transporter SMF2	3.674	5.772	4.875	4.77367	1.05266	0.0249703
P39077	T-complex protein 1 subunit gamma	3.677	3.475	2.73	3.294	0.498771	0.0153948
P36108	DOA4-independent degradation protein 4	3.694	2.753	5.227	3.89133	1.24875	0.0569205
Q12114	Chitin biosynthesis protein CHS5	3.728	4.284	3.198	3.73667	0.543052	0.0128727
Q12284	FAD-linked sulfhydryl oxidase ERV2	3.87	3.257	1.968	3.03167	0.970815	0.0683947
Q04958	Lysophospholipase NTE1	3.893	5.368	4.843	4.70133	0.747635	0.0133288
P41807	V-type proton ATPase subunit H	3.955	3.83	3.799	3.86133	0.0825853	0.000277566
P53115	Putative DNA helicase INO80	3.958	3.323	2.889	3.39	0.53764	0.016453
P33299	26S protease regulatory subunit 7 homolog	3.961	2.547	2.291	2.933	0.899429	0.0651908
Q12452	3-keto-steroid reductase	4.002	5.435	3.408	4.28167	1.04204	0.0320044
P32599	Fimbrin	4.019	3.073	3.928	3.67333	0.521891	0.0124667
P29704	Squalene synthase	4.078	4.788	4.902	4.58933	0.446481	0.00511815
P21965	Protein kinase MCK1	4.085	2.796	2.587	3.156	0.811296	0.0441009
P36015	Synaptobrevin homolog YKT6	4.096	3.195	5.362	4.21767	1.08861	0.0361008
P38630	Replication factor C subunit 1	4.111	3.2	3.038	3.44967	0.578431	0.0180827
Q12443	Reticulon-like protein 2	4.124	4.424	6.872	5.14	1.50744	0.0414641
Q04947	Reticulon-like protein 1	4.133	4.299	3.856	4.096	0.223806	0.00173735
Q12499	Nucleolar protein 58	4.151	3.073	2.549	3.25767	0.816809	0.0409689
Q03103	Endoplasmic oxidoreductin-1	4.153	3.513	2.882	3.516	0.635505	0.0206113
P40335	Carboxypeptidase Y-deficient protein 8	4.192	3.259	3.541	3.664	0.478507	0.010584
Q12697	Vacuolar cation-transporting ATPase YPK9	4.27	4.104	5.021	4.465	0.488611	0.00656308
P37020	Anion/proton exchange transporter GEF1	4.326	4.224	5.247	4.599	0.563497	0.00807262
Q08224	Hydroxymethylpyrimidine/phosphomethylpyrimidine kinase THI20	4.331	3.743	3.226	3.76667	0.55288	0.0130515
P15454	Guanylate kinase	4.346	3.017	2.833	3.39867	0.825557	0.0372904
P32472	Peptidyl-prolyl cis-trans isomerase FPR2	4.349	4.582	3.027	3.986	0.83865	0.0253006
Q3E846	Cytochrome c oxidase assembly factor 6	4.43	2.627	4.781	3.946	1.15569	0.0476601
Q06169	Peroxisomal membrane protein PEX30	4.458	4.266	4.822	4.51533	0.282399	0.00214424
P07806	Valine--tRNA ligase, mitochondrial	4.525	6.073	5.578	5.392	0.790584	0.0106288
Q12164	Pore membrane protein of 33 kDa	4.572	3.562	3.292	3.80867	0.67471	0.0186981
P00546	Cyclin-dependent kinase 1	4.629	3.512	3.697	3.946	0.598684	0.0134882
Q03104	Meiotic sister chromatid recombination protein 1	4.659	6.829	3.829	5.10567	1.54907	0.0443213
P40159	Uncharacterized protein YNL208W	4.711	4.688	3.291	4.23	0.813279	0.0204855
Q12680	Glutamate synthase [NADH]	4.716	3.962	4.3	4.326	0.377672	0.00427046
P11938	DNA-binding protein RAP1	4.776	4.579	2.878	4.07767	1.0436	0.0362554
P08067	Cytochrome b-c1 complex subunit Rieske, mitochondrial	5.016	4.692	5.026	4.91133	0.190014	0.000785757
P38264	Inorganic phosphate transport protein PHO88	5.036	6.924	5.086	5.682	1.07589	0.0171502
Q03390	Vacuolar protein-sorting-associated protein 60	5.092	7.546	7.003	6.547	1.28898	0.0175276
P42838	Alkylphosphocholine resistance protein LEM3	5.228	4.456	4.003	4.56233	0.619384	0.00992715
P38811	Transcription-associated protein 1	5.229	6.056	4.313	5.19933	0.871879	0.0140666
P32074	Coatomer subunit gamma	5.292	6.447	4.887	5.542	0.809491	0.0104226
Q08723	26S proteasome regulatory subunit RPN8	5.341	4.566	3.98	4.629	0.682684	0.0115915
P11076	ADP-ribosylation factor 1	5.573	6.28	4.301	5.38467	1.00285	0.0169941
Q08245	Protein ZEO1	5.584	4.429	3.094	4.369	1.24608	0.0427011
P15732	Ubiquitin-conjugating enzyme E2-16 kDa	5.699	6.309	5.064	5.69067	0.622542	0.00582026
Q12449	Hsp90 co-chaperone AHA1	5.739	4.473	3.223	4.47833	1.25801	0.0409426
P38129	Transcription initiation factor TFIID subunit 5	6.11	6.056	8.466	6.87733	1.37609	0.017787
P32897	Mitochondrial import inner membrane translocase subunit TIM23	6.291	5.765	7.969	6.675	1.15108	0.0134381
P31384	Glucose-repressible alcohol dehydrogenase transcriptional effector	6.446	7.557	5.841	6.61467	0.870345	0.00791469
P04802	Aspartate--tRNA ligase, cytoplasmic	6.582	5.228	5.457	5.75567	0.724728	0.00765241
P12683	3-hydroxy-3-methylglutaryl-coenzyme A reductase 1	6.617	5.46	4.078	5.385	1.27116	0.0268872
P25568	Autophagy-related protein 22	6.665	7.546	5.678	6.62967	0.934501	0.00906023
P36105	60S ribosomal protein L14-A	6.691	5.299	7.258	6.416	1.00804	0.0113509
P28777	Chorismate synthase	6.727	6.945	5.146	6.27267	0.981791	0.0113607
P32913	Vacuolar protein sorting-associated protein 17	7.177	4.396	5.811	5.79467	1.39057	0.0269114
P32353	C-5 sterol desaturase	7.537	5.574	6.269	6.46	0.995341	0.0108966
P09734	Tubulin alpha-3 chain	8.793	7.341	10.806	8.98	1.74005	0.0154818
P47031	Mitochondrial outer membrane protein IML2	9.449	8.386	9.373	9.06933	0.593003	0.00179534
P27476	Nuclear localization sequence-binding protein	10.668	8.006	8.903	9.19233	1.35438	0.00898791
P39111	V-type proton ATPase subunit F	10.765	13.945	9.969	11.5597	2.10375	0.0129733
P40087	DNA damage-inducible protein 1	21.182	25.004	22.773	22.9863	1.91991	0.00253211
Q12402	Protein YOP1	33.384	31.46	41.874	35.5727	5.54126	0.00845463
P06115	Catalase T	0.217	0.136	0.137	0.163333	0.0464794	0.00102713

## Sheet: Sheet2
Table S2-2. Data summary for protein TU:BL ratio measurement
NOTES:
1) Protein ratios reflecting relative changes of the protein levels in the TU sample vs the TO sample were measured from three biological replicates (Rep 1, 2, 3)
2) Average (AVE) and standard deviation (SD) for triplicate ratio measurement are shown.
3) P-values reflect the statistical deviation of individual protein ratios from unity.
Uniprot accession	Protein description	Rep 1	Rep 2	Rep 3	AVE	SD	p-value
O14455	60S ribosomal protein L36-B	1.97	1.874	2.038	1.96067	0.0823974	0.00244324
O14467	Multiprotein-bridging factor 1	1.247	0.939	1.262	1.14933	0.182308	0.291758
P00330	Alcohol dehydrogenase 1	0.753	0.411	0.588	0.584	0.171035	0.0519908
P00359	Glyceraldehyde-3-phosphate dehydrogenase 3	0.559	0.337	0.443	0.446333	0.111038	0.013143
P00360	Glyceraldehyde-3-phosphate dehydrogenase 1	0.574	0.703	0.421	0.566	0.14117	0.0335058
P00549	Pyruvate kinase 1	0.367	0.325	0.258	0.316667	0.0549758	0.00215057
P00560	Phosphoglycerate kinase	0.678	0.436	0.922	0.678667	0.243001	0.149129
P00815	Histidine biosynthesis trifunctional protein	0.43	0.388	0.465	0.427667	0.038553	0.00150908
P00924	Enolase 1	0.757	0.927	0.754	0.812667	0.0990269	0.0818685
P00925	Enolase 2	0.791	0.571	0.571	0.644333	0.127017	0.0399803
P00950	Phosphoglycerate mutase 1	0.587	0.435	0.366	0.462667	0.113068	0.0144405
P01120	Ras-like protein 2	2.841	3.12	2.417	2.79267	0.353984	0.0127491
P01123	GTP-binding protein YPT1	0.592	0.592	0.599	0.594333	0.00404145	3.30821e-05
P02294	Histone H2B.2	0.873	0.663	0.691	0.742333	0.114023	0.0595084
P02309	Histone H4	0.634	0.74	1.028	0.800667	0.203886	0.232462
P02400	60S acidic ribosomal protein P2-beta	0.448	0.595	0.456	0.499667	0.0826579	0.00897535
P02406	60S ribosomal protein L28	0.209	0.317	0.403	0.309667	0.0972077	0.00654459
P02557	Tubulin beta chain	0.892	0.767	0.676	0.778333	0.108445	0.0713477
P02994	Elongation factor 1-alpha	0.73	0.76	0.528	0.672667	0.12618	0.0461307
P03872	Partitioning protein REP2	2.998	1.654	1.762	2.138	0.746737	0.118541
P03965	Carbamoyl-phosphate synthase arginine-specific large chain	1.849	1.614	1.592	1.685	0.142454	0.0141115
P04147	Polyadenylate-binding protein, cytoplasmic and nuclear	1.344	1.221	1.295	1.28667	0.061922	0.0151993
P04173	3-isopropylmalate dehydrogenase	6.124	5.145	7.751	6.34	1.31636	0.0196602
P04449	60S ribosomal protein L24-A	0.345	0.308	0.312	0.321667	0.020306	0.00029857
P04456	60S ribosomal protein L25	0.46	0.26	0.388	0.369333	0.101298	0.00849032
P04786	DNA topoisomerase 1	0.902	0.666	0.601	0.723	0.158389	0.0938886
P04801	Threonine--tRNA ligase, cytoplasmic	1.304	2.459	1.69	1.81767	0.587988	0.137656
P04806	Hexokinase-1	1	1.091	0.665	0.918667	0.224344	0.594188
P04807	Hexokinase-2	0.346	0.286	0.449	0.360333	0.0824399	0.00549107
P04840	Mitochondrial outer membrane protein porin 1	1.194	1.078	0.898	1.05667	0.149149	0.578116
P04912	Histone H2A.2	0.892	0.82	0.652	0.788	0.123158	0.0964888
P05030	Plasma membrane ATPase 1	0.81	0.676	0.717	0.734333	0.068661	0.0215481
P05317	60S acidic ribosomal protein P0	0.5	0.733	0.774	0.669	0.147787	0.060484
P05318	60S acidic ribosomal protein P1-alpha	0.499	0.548	0.792	0.613	0.156943	0.050688
P05319	60S acidic ribosomal protein P2-alpha	0.65	0.56	0.53	0.58	0.06245	0.00728914
P05374	Phosphatidylethanolamine N-methyltransferase	2.486	2.09	2.389	2.32167	0.206408	0.00803214
P05375	Phosphatidyl-N-methylethanolamine N-methyltransferase	4.617	7.091	5.71	5.806	1.23979	0.0214706
P05453	Eukaryotic peptide chain release factor GTP-binding subunit	1.1	1.107	0.797	1.00133	0.176992	0.990774
P05738	60S ribosomal protein L9-A	1.124	1	1.019	1.04767	0.0667857	0.341866
P05739	60S ribosomal protein L6-B	0.424	0.371	0.384	0.393	0.0276225	0.000689567
P05740	60S ribosomal protein L17-A	0.419	0.234	0.399	0.350667	0.10153	0.00805123
P05743	60S ribosomal protein L26-A	1.579	1.073	1.488	1.38	0.269735	0.134809
P05744	60S ribosomal protein L33-A	0.65	0.525	0.577	0.584	0.0627933	0.0075094
P05748	60S ribosomal protein L15-A	1.28	1.177	1.122	1.193	0.080206	0.0530299
P05749	60S ribosomal protein L22-A	1.177	1.381	1.224	1.26067	0.106829	0.0516843
P05750	40S ribosomal protein S3	0.256	0.27	0.309	0.278333	0.0274651	0.000482452
P05755	40S ribosomal protein S9-B	2.329	1.981	2.889	2.39967	0.458106	0.0339023
P05756	40S ribosomal protein S13	0.248	0.244	0.457	0.316333	0.121837	0.0104213
P05759	Ubiquitin-40S ribosomal protein S31	0.737	0.685	0.971	0.797667	0.152346	0.148111
P06103	Eukaryotic translation initiation factor 3 subunit B	1.11	1.497	0.919	1.17533	0.294487	0.410812
P06105	Protein SCP160	1.355	1.699	1.857	1.637	0.256679	0.050091
P06168	Ketol-acid reductoisomerase, mitochondrial	0.628	0.661	0.546	0.611667	0.0592143	0.00766142
P06169	Pyruvate decarboxylase isozyme 1	0.492	0.465	0.454	0.470333	0.0195533	0.000453962
P06197	CDP-diacylglycerol--inositol 3-phosphatidyltransferase	1.742	1.886	1.732	1.78667	0.0861704	0.00397573
P06634	ATP-dependent RNA helicase DED1	3.638	3.164	3.275	3.359	0.247913	0.00366127
P06738	Glycogen phosphorylase	1.099	0.958	0.681	0.912667	0.212655	0.550659
P06774	Transcriptional activator HAP2	1.712	1.583	1.065	1.45333	0.342436	0.148865
P06780	GTP-binding protein RHO1	0.586	0.314	0.568	0.489333	0.15211	0.028324
P06787	Calmodulin	1.847	1.617	1.55	1.67133	0.155777	0.0174784
P07149	Fatty acid synthase subunit beta	0.432	0.38	0.373	0.395	0.0322335	0.00094486
P07244	Bifunctional purine biosynthetic protein ADE5,7	1.031	0.657	0.764	0.817333	0.19262	0.242184
P07245	C-1-tetrahydrofolate synthase, cytoplasmic	0.82	0.515	0.515	0.616667	0.176092	0.0636936
P07251	ATP synthase subunit alpha, mitochondrial	0.264	0.367	0.279	0.303333	0.0556447	0.00211979
P07259	Protein URA2	0.101	0.084	0.101	0.0953333	0.00981495	3.92331e-05
P07264	3-isopropylmalate dehydratase	0.496	0.377	0.43	0.434333	0.0596182	0.00368224
P07278	cAMP-dependent protein kinase regulatory subunit	3.895	3.712	3.216	3.60767	0.351318	0.00599592
P07280	40S ribosomal protein S19-A	0.123	0.153	0.237	0.171	0.0590931	0.00168944
P07281	40S ribosomal protein S19-B	1.259	1.371	1.385	1.33833	0.0690604	0.0136054
P07283	Phosphomannomutase	0.316	0.25	0.295	0.287	0.0337194	0.000744689
P07560	Ras-related protein SEC4	1.398	1.13	1.287	1.27167	0.134656	0.0730367
P08456	CDP-diacylglycerol--serine O-phosphatidyltransferase	2.658	2.313	2.956	2.64233	0.321786	0.012556
P08524	Farnesyl pyrophosphate synthase	0.604	0.553	0.489	0.548667	0.0576223	0.00538944
P08566	Pentafunctional AROM polypeptide	1.696	2.084	1.226	1.66867	0.429653	0.114471
P09064	Eukaryotic translation initiation factor 2 subunit beta	0.558	0.739	0.631	0.642667	0.0910622	0.020969
P09436	Isoleucine--tRNA ligase, cytoplasmic	0.387	0.558	0.624	0.523	0.122315	0.0212228
P09457	ATP synthase subunit 5, mitochondrial	0.596	0.352	0.447	0.465	0.122992	0.0171644
P09733	Tubulin alpha-1 chain	1.725	1.825	1.536	1.69533	0.146766	0.0145278
P09734	Tubulin alpha-3 chain	8.289	5.821	6.339	6.81633	1.3014	0.0162815
P09938	Ribonucleoside-diphosphate reductase small chain 1	1.623	1.431	1.001	1.35167	0.318499	0.195961
P0C0W9	60S ribosomal protein L11-A	0.199	0.197	0.124	0.173333	0.0427356	0.000889648
P0C2H7	60S ribosomal protein L27-B	0.69	0.659	0.732	0.693667	0.0366379	0.00473432
P0C2H8	60S ribosomal protein L31-A	0.496	0.411	0.327	0.411333	0.0845005	0.00679848
P0C2H9	60S ribosomal protein L31-B	1.149	0.743	0.832	0.908	0.213403	0.533089
P0CX24	60S ribosomal protein L20-B	1.075	1.005	1.02	1.03333	0.0368556	0.25773
P0CX26	60S ribosomal protein L43-B	0.285	0.293	0.456	0.344667	0.0965004	0.00715048
P0CX28	60S ribosomal protein L42-B	0.368	0.461	0.467	0.432	0.0555068	0.00316815
P0CX30	40S ribosomal protein S23-B	1.414	0.889	1.019	1.10733	0.27342	0.566694
P0CX32	40S ribosomal protein S24-B	0.117	0.119	0.152	0.129333	0.0196554	0.000169835
P0CX34	40S ribosomal protein S30-B	0.529	0.674	0.642	0.615	0.0761774	0.0128
P0CX36	40S ribosomal protein S4-B	0.274	0.281	0.356	0.303667	0.0454569	0.00141749
P0CX38	40S ribosomal protein S6-B	1.069	1.102	1.083	1.08467	0.016563	0.0125175
P0CX40	40S ribosomal protein S8-B	0.434	0.436	0.364	0.411333	0.0410041	0.0016134
P0CX42	60S ribosomal protein L23-B	0.241	0.268	0.348	0.285667	0.0556447	0.00201655
P0CX44	60S ribosomal protein L1-B	0.239	0.39	0.426	0.351667	0.0992186	0.00771647
P0CX46	60S ribosomal protein L2-B	0.336	0.44	0.591	0.455667	0.12822	0.0179974
P0CX48	40S ribosomal protein S11-B	0.517	0.49	0.348	0.451667	0.0907873	0.00901439
P0CX50	60S ribosomal protein L18-B	1.398	1.239	1.509	1.382	0.135709	0.0395884
P0CX52	40S ribosomal protein S16-B	0.206	0.225	0.343	0.258	0.0742226	0.00331877
P0CX54	60S ribosomal protein L12-B	0.485	0.52	0.528	0.511	0.0228692	0.000728263
P0CX56	40S ribosomal protein S18-B	0.217	0.33	0.356	0.301	0.0738986	0.00370491
P0CX83	60S ribosomal protein L19-B	0.28	0.25	0.238	0.256	0.0216333	0.000281705
P0CX85	60S ribosomal protein L35-B	0.317	0.301	0.521	0.379667	0.122659	0.0127832
P10080	Single-stranded nucleic acid-binding protein	2.736	2.657	2.107	2.5	0.342632	0.0169512
P10081	ATP-dependent RNA helicase eIF4A	0.975	0.903	1.25	1.04267	0.183129	0.725604
P10127	Alcohol dehydrogenase 4	0.295	0.288	0.454	0.345667	0.0938847	0.00679247
P10591	Heat shock protein SSA1	1.225	0.77	0.705	0.9	0.283328	0.603214
P10592	Heat shock protein SSA2	0.388	0.339	0.224	0.317	0.0841843	0.00502593
P10614	Lanosterol 14-alpha demethylase	1.326	0.745	0.834	0.968333	0.312929	0.877004
P10622	60S acidic ribosomal protein P1-beta	0.533	0.59	0.634	0.585667	0.0506392	0.00494225
P10659	S-adenosylmethionine synthase 1	2.881	2.234	2.24	2.45167	0.371826	0.0211766
P10664	60S ribosomal protein L4-A	0.187	0.217	0.268	0.224	0.0409512	0.000927009
P11076	ADP-ribosylation factor 1	0.919	1.016	0.99	0.975	0.0502096	0.479355
P11484	Heat shock protein SSB1	0.442	0.307	0.624	0.457667	0.15908	0.0275021
P11633	Non-histone chromosomal protein 6B	2.873	2.102	2.96	2.645	0.472259	0.0263904
P12385	Eukaryotic peptide chain release factor subunit 1	1.763	1.283	1.807	1.61767	0.290664	0.0665338
P12612	T-complex protein 1 subunit alpha	0.539	0.479	0.407	0.475	0.0660908	0.00524105
P12683	3-hydroxy-3-methylglutaryl-coenzyme A reductase 1	1.014	1.189	0.873	1.02533	0.158305	0.807665
P12688	Serine/threonine-protein kinase YPK1	2.308	2.353	1.675	2.112	0.379121	0.0366302
P12695	Dihydrolipoyllysine-residue acetyltransferase component of pyruvate dehydrogenase complex, mitochondrial	0.155	0.134	0.075	0.121333	0.0414769	0.000741924
P13185	Serine/threonine protein kinase KIN1	0.338	0.404	0.562	0.434667	0.115106	0.0135386
P13586	Calcium-transporting ATPase 1	2.034	2.621	2.296	2.317	0.294063	0.0162152
P14020	Dolichol-phosphate mannosyltransferase	3.411	4.08	5.326	4.27233	0.97188	0.0281665
P14120	60S ribosomal protein L30	0.401	0.404	0.546	0.450333	0.0828633	0.00749038
P14126	60S ribosomal protein L3	0.417	0.415	0.585	0.472333	0.0975773	0.0112075
P14127	40S ribosomal protein S17-B	0.845	0.85	1.084	0.926333	0.136566	0.448778
P14540	Fructose-bisphosphate aldolase	0.982	0.744	0.751	0.825667	0.135434	0.155554
P14742	Glutamine--fructose-6-phosphate aminotransferase [isomerizing]	0.883	0.798	1.168	0.949667	0.1938	0.696877
P14832	Peptidyl-prolyl cis-trans isomerase	0.795	1.32	1.187	1.10067	0.27294	0.588337
P14906	Protein translocation protein SEC63	3.967	2.344	2.026	2.779	1.04105	0.0977058
P15019	Transaldolase	0.577	0.836	0.618	0.677	0.139216	0.0567068
P15108	ATP-dependent molecular chaperone HSC82	1.506	1.04	0.989	1.17833	0.284911	0.391602
P15367	Signal peptidase complex catalytic subunit SEC11	1.098	1.553	1.782	1.47767	0.348167	0.140669
P15646	rRNA 2'-O-methyltransferase fibrillarin	2.579	2.41	1.966	2.31833	0.316614	0.0186887
P15703	Glucan 1,3-beta-glucosidase	1.214	1.11	1.323	1.21567	0.10651	0.0725623
P15891	Actin-binding protein	0.779	0.804	0.503	0.695333	0.167034	0.087276
P15992	Heat shock protein 26	1.761	1.563	1.624	1.64933	0.101402	0.00803116
P16140	V-type proton ATPase subunit B	0.741	0.669	0.456	0.622	0.148199	0.0476081
P16387	Pyruvate dehydrogenase E1 component subunit alpha, mitochondrial	0.101	0.085	0.089	0.0916667	0.00832666	2.80099e-05
P16451	Pyruvate dehydrogenase complex protein X component, mitochondrial	9.235	7.332	6.407	7.658	1.44191	0.0152766
P16474	78 kDa glucose-regulated protein homolog	2.226	2.307	1.817	2.11667	0.26266	0.0179475
P16521	Elongation factor 3A	0.476	0.42	0.427	0.441	0.0305123	0.00099165
P16603	NADPH--cytochrome P450 reductase	1.722	1.99	2.255	1.989	0.266501	0.0233592
P16861	6-phosphofructokinase subunit alpha	0.31	0.414	0.43	0.384667	0.0651562	0.00371658
P16862	6-phosphofructokinase subunit beta	2.447	2.539	1.5	2.162	0.575151	0.0728523
P17076	60S ribosomal protein L8-A	1.064	1.256	1.087	1.13567	0.104844	0.154288
P17255	V-type proton ATPase catalytic subunit A	0.869	0.857	0.569	0.765	0.169847	0.138778
P17695	Glutaredoxin-2, mitochondrial	3.152	3.026	2.923	3.03367	0.114692	0.00105852
P17709	Glucokinase-1	1.133	1.448	2.045	1.542	0.463209	0.179922
P17891	Clathrin light chain	1.87	2.067	2.758	2.23167	0.466339	0.0446121
P17967	Protein disulfide-isomerase	3.421	3.73	3.557	3.56933	0.154869	0.00120886
P18239	ADP,ATP carrier protein 2	0.686	0.555	0.627	0.622667	0.0656074	0.00992726
P18414	ER lumen protein retaining receptor	4.414	3.367	4.036	3.939	0.530197	0.0106747
P18562	Uracil phosphoribosyltransferase	1.753	1.446	2.058	1.75233	0.306001	0.0509656
P18759	Vesicular-fusion protein SEC18	1.218	0.893	1.051	1.054	0.162521	0.623074
P19073	Cell division control protein 42	1.073	0.94	1.007	1.00667	0.0665006	0.878135
P19097	Fatty acid synthase subunit alpha	0.438	0.383	0.368	0.396333	0.0368556	0.00124017
P19146	ADP-ribosylation factor 2	1.175	0.775	1.037	0.995667	0.203178	0.973888
P19262	Dihydrolipoyllysine-residue succinyltransferase component of 2-oxoglutarate dehydrogenase complex, mitochondrial	0.643	0.385	0.524	0.517333	0.129129	0.0230367
P19358	S-adenosylmethionine synthase 2	3.693	2.947	1.879	2.83967	0.911751	0.0730207
P19882	Heat shock protein 60, mitochondrial	0.24	0.274	0.339	0.284333	0.0503024	0.00164272
P19955	37S ribosomal protein YMR-31, mitochondrial	0.184	0.151	0.159	0.164667	0.0172143	0.00014153
P20107	Zinc/cadmium resistance protein	0.816	0.672	1.136	0.874667	0.237498	0.457182
P20424	Signal recognition particle subunit SRP54	1.101	1.109	1.285	1.165	0.104	0.11084
P20606	Small COPII coat GTPase SAR1	1.201	0.784	1.134	1.03967	0.223934	0.787986
P20967	2-oxoglutarate dehydrogenase, mitochondrial	0.458	0.46	0.416	0.444667	0.0248462	0.000666587
P21375	Osmotic growth protein 1	1.491	1.398	1.677	1.522	0.14206	0.0238095
P21576	Vacuolar protein sorting-associated protein 1	0.531	0.397	0.385	0.437667	0.0810514	0.00685377
P21954	Isocitrate dehydrogenase [NADP], mitochondrial	0.43	0.258	0.284	0.324	0.0927146	0.00621184
P21965	Protein kinase MCK1	0.598	0.764	0.918	0.76	0.160037	0.121737
P22137	Clathrin heavy chain	0.536	0.418	0.678	0.544	0.130184	0.0261093
P22146	1,3-beta-glucanosyltransferase GAS1	1.459	1.307	1.513	1.42633	0.106814	0.0202892
P22147	5'-3' exoribonuclease 1	0.292	0.518	0.386	0.398667	0.113531	0.011674
P22203	V-type proton ATPase subunit E	0.307	0.29	0.289	0.295333	0.010116	6.86884e-05
P22517	Calcium/calmodulin-dependent protein kinase II	0.362	0.206	0.342	0.303333	0.0848842	0.00491217
P22803	Thioredoxin-2	1.67	1.342	1.431	1.481	0.16962	0.0390405
P23248	40S ribosomal protein S1-B	0.244	0.361	0.306	0.303667	0.0585349	0.00234716
P23301	Eukaryotic translation initiation factor 5A-1	0.638	0.51	0.52	0.556	0.0711899	0.00846078
P23642	Mannan polymerase I complex VAN1 subunit	1.771	2.539	2.044	2.118	0.389311	0.0381229
P24000	60S ribosomal protein L24-B	1.077	1.295	1.195	1.189	0.109124	0.0954729
P24276	Protein SSD1	0.597	0.366	0.435	0.466	0.118579	0.0160422
P24783	ATP-dependent RNA helicase DBP2	1.854	2.393	1.692	1.97967	0.367007	0.0437351
P25045	Serine palmitoyltransferase 1	2.296	4.067	2.902	3.08833	0.900084	0.0567062
P25087	Sterol 24-C-methyltransferase	0.731	0.577	0.648	0.652	0.0770779	0.0159619
P25294	Protein SIS1	0.557	0.428	0.286	0.423667	0.135552	0.0179444
P25303	DnaJ-related protein SCJ1	1.6	2.309	2.178	2.029	0.377255	0.0420015
P25342	Cell division control protein 10	2.043	2.187	1.464	1.898	0.382689	0.0555413
P25343	Reduced viability upon starvation protein 161	1.194	0.66	1.016	0.956667	0.271899	0.808425
P25367	[PIN+] prion protein R1	2.949	1.858	2.016	2.27433	0.589595	0.0645249
P25443	40S ribosomal protein S2	0.402	0.379	0.42	0.400333	0.0205508	0.000391255
P25491	Mitochondrial protein import protein MAS5	1.01	0.661	0.785	0.818667	0.176919	0.217843
P25560	Protein RER1	1.635	1.28	2.212	1.709	0.470386	0.120722
P25567	RNA-binding protein SRO9	0.688	0.752	0.436	0.625333	0.167061	0.0603373
P25574	ER membrane protein complex subunit 1	1.868	2.356	1.973	2.06567	0.256859	0.0188203
P25694	Cell division control protein 48	0.677	0.933	0.965	0.858333	0.157852	0.260315
P26321	60S ribosomal protein L5	1.73	1.338	1.529	1.53233	0.196021	0.0423475
P26783	40S ribosomal protein S5	0.179	0.192	0.262	0.211	0.044643	0.00106546
P26784	60S ribosomal protein L16-A	1.039	0.731	1.016	0.928667	0.17157	0.546233
P26785	60S ribosomal protein L16-B	0.743	0.676	0.723	0.714	0.0343948	0.00478635
P26786	40S ribosomal protein S7-A	0.428	0.409	0.571	0.469333	0.0885569	0.00915554
P27476	Nuclear localization sequence-binding protein	1.399	1.306	1.152	1.28567	0.124749	0.0580842
P27614	Carboxypeptidase S	1.066	0.975	0.653	0.898	0.217	0.501082
P27692	Transcription elongation factor SPT5	0.841	0.662	0.728	0.743667	0.0905226	0.0391455
P27809	Glycolipid 2-alpha-mannosyltransferase	1.956	1.443	1.043	1.48067	0.457664	0.210512
P27810	Alpha-1,2 mannosyltransferase KTR1	1.282	1.165	1.006	1.151	0.138532	0.199645
P28007	H/ACA ribonucleoprotein complex subunit 1	0.452	0.372	0.305	0.376333	0.0735957	0.00460965
P28274	CTP synthase 1	0.11	0.119	0.205	0.144667	0.0524436	0.00125077
P28321	Monoglyceride lipase	1.283	1.17	0.754	1.069	0.278588	0.709719
P28625	Protein YIM1	3.323	2.627	2.087	2.679	0.619639	0.0425249
P29311	Protein BMH1	1.619	1.453	0.823	1.29833	0.419935	0.343595
P29453	60S ribosomal protein L8-B	0.248	0.221	0.305	0.258	0.0428836	0.00111155
P29547	Elongation factor 1-gamma 1	0.765	0.843	0.603	0.737	0.122425	0.06524
P29704	Squalene synthase	2.597	2.663	2.454	2.57133	0.106838	0.00153741
P30605	Myo-inositol transporter 1	6.192	7.687	4.658	6.179	1.51454	0.0273431
P30624	Long-chain-fatty-acid--CoA ligase 1	0.75	0.725	0.746	0.740333	0.0134288	0.000890312
P31109	Synaptobrevin homolog 1	1.14	1.158	1.859	1.38567	0.410017	0.244828
P31382	Dolichyl-phosphate-mannose--protein mannosyltransferase 2	2.108	1.894	2.311	2.10433	0.208524	0.011677
P31412	V-type proton ATPase subunit C	0.93	0.778	0.584	0.764	0.173424	0.142508
P31539	Heat shock protein 104	1.198	0.653	0.88	0.910333	0.273763	0.627693
P31688	Trehalose-phosphatase	0.105	0.178	0.144	0.142333	0.0365285	0.000604105
P32074	Coatomer subunit gamma	0.312	0.211	0.367	0.296667	0.0791223	0.00419195
P32319	Vacuolar protein sorting/targeting protein VPS10	1.539	1.405	1.82	1.588	0.211795	0.0406294
P32324	Elongation factor 2	0.831	0.735	0.915	0.827	0.0900666	0.0796961
P32352	C-8 sterol isomerase	3.985	3.371	4.561	3.97233	0.595101	0.0130998
P32353	C-5 sterol desaturase	0.37	0.315	0.267	0.317333	0.0515396	0.00189456
P32356	Neutral trehalase	0.992	0.554	1.048	0.864667	0.270498	0.477531
P32366	V-type proton ATPase subunit d	2.585	2.465	1.518	2.18933	0.58448	0.0719254
P32368	Phosphoinositide phosphatase SAC1	1.206	1.464	1.647	1.439	0.22156	0.0754247
P32386	ATP-dependent bile acid permease	0.713	0.406	0.692	0.603667	0.171506	0.057123
P32471	Elongation factor 1-beta	0.156	0.124	0.184	0.154667	0.0300222	0.000420179
P32472	Peptidyl-prolyl cis-trans isomerase FPR2	1.201	0.756	0.842	0.933	0.236044	0.671638
P32473	Pyruvate dehydrogenase E1 component subunit beta, mitochondrial	0.114	0.095	0.083	0.0973333	0.0156312	9.99405e-05
P32476	Squalene monooxygenase	0.257	0.373	0.26	0.296667	0.0661236	0.00293329
P32527	Zuotin	0.225	0.329	0.199	0.251	0.0687895	0.00279984
P32528	Urea amidolyase	0.745	0.649	0.987	0.793667	0.174176	0.176629
P32563	V-type proton ATPase subunit a, vacuolar isoform	0.299	0.276	0.405	0.326667	0.0688065	0.00346272
P32565	26S proteasome regulatory subunit RPN2	0.596	0.631	0.493	0.573333	0.0717379	0.00929208
P32582	Cystathionine beta-synthase	1.238	1.035	0.773	1.01533	0.233123	0.919704
P32583	Suppressor protein SRP40	1.849	1.648	1.665	1.72067	0.111464	0.00787999
P32588	Nuclear and cytoplasmic polyadenylated RNA-binding protein PUB1	0.467	0.531	0.365	0.454333	0.0837218	0.00775577
P32589	Heat shock protein homolog SSE1	0.293	0.248	0.366	0.302333	0.0595511	0.00241982
P32597	Nuclear protein STH1/NPS1	1.877	1.467	1.321	1.555	0.288257	0.0793623
P32599	Fimbrin	1.16	1.335	1.084	1.193	0.128713	0.121762
P32602	Alpha-soluble NSF attachment protein	1	0.972	0.633	0.868333	0.204285	0.380402
P32621	Guanosine-diphosphatase	3.166	2.406	2.148	2.57333	0.529227	0.0357078
P32791	Ferric/cupric reductase transmembrane component 1	1.754	1.862	2.147	1.921	0.203034	0.0158161
P32803	Endosomal protein P24B	2.585	2.143	1.707	2.145	0.439003	0.0456702
P32804	Zinc-regulated transporter 1	0.662	0.768	0.721	0.717	0.0531131	0.0115383
P32835	GTP-binding nuclear protein GSP1/CNR1	1.621	1.627	1.143	1.46367	0.277722	0.101675
P32836	GTP-binding nuclear protein GSP2/CNR2	0.702	0.795	1.074	0.857	0.193595	0.329126
P32913	Vacuolar protein sorting-associated protein 17	2.558	1.876	2.174	2.20267	0.341903	0.0258978
P32915	Protein transport protein SEC61	1.827	1.459	1.756	1.68067	0.195224	0.0263419
P32939	GTP-binding protein YPT7	1.879	2.392	1.253	1.84133	0.570433	0.125115
P33297	26S protease regulatory subunit 6A	0.874	0.668	0.612	0.718	0.137971	0.0713563
P33298	26S protease regulatory subunit 6B homolog	0.782	0.759	0.573	0.704667	0.114605	0.0467065
P33299	26S protease regulatory subunit 7 homolog	0.567	0.644	0.839	0.683333	0.140201	0.0595617
P33322	H/ACA ribonucleoprotein complex subunit 4	2.19	2.386	1.279	1.95167	0.590732	0.108022
P33328	Synaptobrevin homolog 2	1.462	1.915	1.574	1.65033	0.23595	0.0411862
P33442	40S ribosomal protein S1-A	0.755	0.923	0.902	0.86	0.0915369	0.117838
P33750	Protein SOF1	0.869	1.536	1.168	1.191	0.334094	0.426438
P33754	Translocation protein SEC66	1.664	3.012	1.877	2.18433	0.724649	0.105424
P33767	Dolichyl-diphosphooligosaccharide--protein glycosyltransferase subunit WBP1	1.969	1.985	2.002	1.98533	0.0165025	9.34872e-05
P33775	Dolichyl-phosphate-mannose--protein mannosyltransferase 1	1.357	2.252	2.072	1.89367	0.473401	0.0821728
P33892	Translational activator GCN1	0.298	0.66	0.751	0.569667	0.23963	0.0896739
P34167	Eukaryotic translation initiation factor 4B	1.396	1.372	1.262	1.34333	0.0714516	0.0141315
P34237	Protein CASP	0.855	0.973	1.126	0.984667	0.135876	0.863092
P34730	Protein BMH2	1.344	1.498	1.883	1.575	0.277627	0.0696836
P34760	Peroxiredoxin TSA1	2.235	1.884	1.259	1.79267	0.494369	0.108887
P35179	Protein transport protein SSS1	2.359	2.873	1.928	2.38667	0.473107	0.0366803
P35191	DnaJ homolog 1, mitochondrial	0.955	0.664	0.659	0.759333	0.169471	0.133076
P35723	Endoplasmic reticulum transmembrane protein 1	3.183	2.529	2.304	2.672	0.456615	0.02397
P36008	Elongation factor 1-gamma 2	0.284	0.247	0.283	0.271333	0.0210792	0.000278836
P36016	Heat shock protein 70 homolog LHS1	0.213	0.208	0.105	0.175333	0.0609617	0.00181657
P36017	Vacuolar protein sorting-associated protein 21	1.307	1.764	1.856	1.64233	0.294028	0.0632867
P36081	Uncharacterized protein YKL077W	1.403	1.244	1.537	1.39467	0.146678	0.0430873
P36095	Vacuolar protein-sorting-associated protein 24	0.618	0.691	0.485	0.598	0.104446	0.0217694
P36105	60S ribosomal protein L14-A	0.403	0.442	0.546	0.463667	0.0739211	0.00627256
P36108	DOA4-independent degradation protein 4	0.783	0.823	0.725	0.777	0.0492747	0.015888
P36148	Glycerol-3-phosphate O-acyltransferase 2	2.715	1.864	2.032	2.20367	0.450724	0.043699
P36421	Tyrosine--tRNA ligase, cytoplasmic	0.373	0.371	0.469	0.404333	0.0560119	0.00293439
P37012	Phosphoglucomutase-2	3.458	1.843	2.664	2.655	0.807538	0.0710116
P37291	Serine hydroxymethyltransferase, cytosolic	0.4	0.479	0.507	0.462	0.0554887	0.00352713
P37296	V-type proton ATPase subunit a, Golgi isoform	0.881	1.321	1.154	1.11867	0.222118	0.452472
P38061	60S ribosomal protein L32	0.162	0.184	0.107	0.151	0.0396611	0.000726639
P38069	Alpha-1,2-mannosyltransferase MNN2	0.437	0.404	0.536	0.459	0.068695	0.00533151
P38077	ATP synthase subunit gamma, mitochondrial	0.546	0.507	0.279	0.444	0.144219	0.0216997
P38079	Protein YRO2	3.229	2.843	3.451	3.17433	0.307664	0.00660784
P38130	Probable mannosyltransferase KTR3	1.38	1.626	1.642	1.54933	0.146865	0.0230066
P38137	Peroxisomal-coenzyme A synthetase	2.731	2.182	3.657	2.85667	0.745487	0.049762
P38167	Protein ECM21	1.765	1.358	1.474	1.53233	0.209677	0.04802
P38177	Uncharacterized protein YBL086C	2.273	1.801	2.5	2.19133	0.356584	0.0285888
P38199	Heterogeneous nuclear rnp K-like protein 2	0.342	0.442	0.411	0.398333	0.0511892	0.00240411
P38219	Obg-like ATPase 1	1.192	1.163	0.939	1.098	0.138459	0.344986
P38221	Phosphatidate cytidylyltransferase	1.577	0.99	1.66	1.409	0.36523	0.191974
P38230	Probable quinone oxidoreductase	5.621	8.113	6.332	6.68867	1.28372	0.0165541
P38249	Eukaryotic translation initiation factor 3 subunit A	0.608	0.519	0.325	0.484	0.14471	0.0252287
P38250	Increased sodium tolerance protein 2	1.42	1.723	2.064	1.73567	0.322187	0.0583905
P38256	Uncharacterized protein YBR096W	3.567	1.891	2.868	2.77533	0.841834	0.0674547
P38264	Inorganic phosphate transport protein PHO88	3.193	3.311	3.211	3.23833	0.0635715	0.000268769
P38286	Very-long-chain 3-oxoacyl-CoA reductase	2.132	2.876	3.373	2.79367	0.624583	0.0381219
P38295	Medium-chain fatty acid ethyl ester synthase/esterase 2	1.286	1.179	1.2	1.22167	0.0566951	0.0211174
P38353	Sec sixty-one protein homolog	2.335	1.794	1.711	1.94667	0.338857	0.0401541
P38427	Trehalose synthase complex regulatory subunit TSL1	2.326	2.001	1.993	2.10667	0.18999	0.009682
P38428	Coupling of ubiquitin conjugation to ER degradation protein 1	1.309	1.563	1.972	1.61467	0.334506	0.0861542
P38555	GTP-binding protein YPT31/YPT8	0.672	0.631	0.714	0.672333	0.041501	0.00530475
P38626	NADH-cytochrome b5 reductase 1	1.291	1.089	1.254	1.21133	0.107547	0.0765452
P38627	CTP synthase 2	0.75	0.731	0.589	0.69	0.087983	0.0258153
P38631	1,3-beta-glucan synthase component FKS1	1.133	1.08	0.869	1.02733	0.139658	0.766901
P38687	Signal recognition particle subunit SRP68	1.733	1.589	2.184	1.83533	0.31042	0.0430791
P38694	Putative aldehyde dehydrogenase-like protein YHR039C	0.604	0.955	0.801	0.786667	0.175938	0.170526
P38701	40S ribosomal protein S20	1.118	0.915	1.073	1.03533	0.106613	0.623901
P38711	40S ribosomal protein S27-B	1.486	1.569	1.314	1.45633	0.130063	0.0260258
P38764	26S proteasome regulatory subunit RPN1	0.727	0.546	0.538	0.603667	0.106885	0.0233957
P38778	Manganese transporter SMF2	1.41	1.682	2.003	1.69833	0.296837	0.0552801
P38788	Ribosome-associated complex subunit SSZ1	0.248	0.221	0.206	0.225	0.0212838	0.00025131
P38817	ADP-ribosylation factor-binding protein GGA2	0.553	0.733	0.522	0.602667	0.113931	0.026329
P38879	Nascent polypeptide-associated complex subunit alpha	1.066	0.741	0.837	0.881333	0.166974	0.343457
P38910	10 kDa heat shock protein, mitochondrial	0.338	0.306	0.285	0.309667	0.0266896	0.000497875
P38911	FK506-binding nuclear protein	1.845	1.018	1.049	1.304	0.468776	0.378057
P38934	Nuclear segregation protein BFR1	0.221	0.214	0.259	0.231333	0.0242143	0.000330622
P38993	Iron transport multicopper oxidase FET3	1.514	1.961	1.587	1.68733	0.239796	0.038259
P39007	Dolichyl-diphosphooligosaccharide--protein glycosyltransferase subunit STT3	2.446	3.36	2.252	2.686	0.591706	0.038689
P39010	Palmitoyltransferase AKR1	3.048	2.992	1.813	2.61767	0.697424	0.0567361
P39015	Suppressor protein STM1	2.155	1.934	2.017	2.03533	0.111635	0.00385303
P39076	T-complex protein 1 subunit beta	0.491	0.365	0.269	0.375	0.111337	0.010413
P39077	T-complex protein 1 subunit gamma	0.338	0.473	0.611	0.474	0.136503	0.0217199
P39078	T-complex protein 1 subunit delta	0.156	0.244	0.197	0.199	0.0440341	0.00100586
P39079	T-complex protein 1 subunit zeta	2.077	1.754	1.108	1.64633	0.493391	0.151349
P39106	Alpha-1,3-mannosyltransferase MNN1	1.493	1.674	1.121	1.42933	0.281944	0.118696
P39107	Mannan polymerase complexes subunit MNN9	1.54	1.931	1.857	1.776	0.207704	0.0230579
P39516	40S ribosomal protein S14-B	0.115	0.121	0.163	0.133	0.0261534	0.000303179
P39517	ATP-dependent RNA helicase DHH1	0.728	0.434	0.572	0.578	0.147092	0.0381927
P39524	Probable phospholipid-transporting ATPase DRS2	1.432	1.784	1.552	1.58933	0.178945	0.0293845
P39676	Flavohemoprotein	1.829	1.795	1.332	1.652	0.277649	0.0554659
P39704	Protein ERP2	2.641	2.651	3.341	2.87767	0.40129	0.0148859
P39705	Nucleoporin NUP60	0.503	0.838	0.742	0.694333	0.172512	0.0917903
P39730	Eukaryotic translation initiation factor 5B	0.381	0.386	0.587	0.451333	0.117517	0.01495
P39743	Reduced viability upon starvation protein 167	0.868	0.627	0.933	0.809333	0.161215	0.177064
P39929	Vacuolar-sorting protein SNF7	1.385	1.667	1.294	1.44867	0.19448	0.0572995
P39931	Protein SSP120	1.611	1.09	2.135	1.612	0.522501	0.179649
P39935	Eukaryotic initiation factor 4F subunit p150	0.321	0.221	0.196	0.246	0.0661438	0.00255533
P39939	40S ribosomal protein S26-B	0.23	0.233	2.383	0.948667	1.24217	0.949451
P39940	E3 ubiquitin-protein ligase RSP5	1.279	1.454	1.532	1.42167	0.129562	0.0300583
P39968	Vacuolar protein 8	0.743	0.756	0.938	0.812333	0.109024	0.0964921
P39986	Probable cation-transporting ATPase 1	2.882	3.002	2.832	2.90533	0.0873689	0.000700156
P39990	13 kDa ribonucleoprotein-associated protein	1.384	1.135	1.14	1.21967	0.142339	0.116087
P40008	Protein FMP52, mitochondrial	2.881	4.042	2.659	3.194	0.742731	0.0361422
P40024	ABC transporter ATP-binding protein ARB1	1.838	2.108	1.751	1.899	0.186153	0.013993
P40030	Ergosterol biosynthetic protein 28	2.114	2.276	1.125	1.83833	0.623052	0.145091
P40040	Protein THO1	0.672	0.707	0.864	0.747667	0.102256	0.05062
P40075	Vesicle-associated membrane protein-associated protein SCS2	2.726	3.119	3.728	3.191	0.504865	0.0172424
P40150	Heat shock protein SSB2	0.589	0.458	0.508	0.518333	0.0661085	0.00622061
P40159	Uncharacterized protein YNL208W	5.129	5.43	5.513	5.35733	0.20205	0.000715962
P40212	60S ribosomal protein L13-B	0.33	0.476	0.67	0.492	0.170564	0.0355836
P40217	Eukaryotic translation initiation factor 3 subunit I	1.017	0.875	1.106	0.999333	0.116509	0.992992
P40319	Elongation of fatty acids protein 3	1.072	1.979	1.905	1.652	0.503656	0.154185
P40327	26S protease regulatory subunit 4 homolog	0.752	0.533	0.649	0.644667	0.109564	0.0302605
P40358	DnaJ-like chaperone JEM1	0.579	0.378	0.723	0.56	0.173283	0.048007
P40433	6-phosphofructo-2-kinase 1	0.235	0.125	0.257	0.205667	0.0707201	0.00263173
P40517	Ran-specific GTPase-activating protein 2	1.12	1.221	1.711	1.35067	0.316118	0.19464
P40531	Protein GVP36	0.376	0.433	0.332	0.380333	0.0506392	0.00221865
P40533	Protein TED1	1.047	1.737	1.584	1.456	0.362371	0.161115
P40540	ER membrane protein complex subunit 5	1.975	1.527	1.267	1.58967	0.358136	0.104109
P40557	ER-retained PMA1-suppressing protein 1	1.747	1.845	2.447	2.013	0.379036	0.0436362
P40582	Glutathione S-transferase 1	1.315	0.92	1.054	1.09633	0.200874	0.493546
P40825	Alanine--tRNA ligase, mitochondrial	0.824	0.697	0.45	0.657	0.190181	0.0890077
P40970	Serine palmitoyltransferase 2	2.589	3.047	2.573	2.73633	0.269164	0.00791529
P40989	1,3-beta-glucan synthase component GSC2	1.415	2.225	1.33	1.65667	0.494023	0.147916
P41056	60S ribosomal protein L33-B	0.883	0.557	0.552	0.664	0.189676	0.0918278
P41057	40S ribosomal protein S29-A	2.567	4.311	2.63	3.16933	0.989214	0.0628482
P41058	40S ribosomal protein S29-B	0.171	0.099	0.188	0.152667	0.0472476	0.0010348
P41543	Dolichyl-diphosphooligosaccharide--protein glycosyltransferase subunit 1	1.136	1.387	0.817	1.11333	0.285675	0.562974
P41805	60S ribosomal protein L10	0.155	0.162	0.214	0.177	0.0322335	0.00051093
P41811	Coatomer subunit beta'	0.403	0.372	0.457	0.410667	0.0430155	0.00177114
P41940	Mannose-1-phosphate guanyltransferase	0.747	0.684	1.288	0.906333	0.332031	0.673438
P42943	T-complex protein 1 subunit eta	0.559	0.473	0.633	0.555	0.080075	0.0106216
P42945	U3 small nucleolar RNA-associated protein 10	0.984	1.028	0.952	0.988	0.0381576	0.640575
P43535	Protein GCN20	0.97	0.773	0.653	0.798667	0.160051	0.161203
P43555	Protein EMP47	2.449	1.952	2.17	2.19033	0.249123	0.0142884
P43585	Vacuolar transporter chaperone 2	1.407	2.071	2.467	1.98167	0.535617	0.0865455
P43603	LAS seventeen-binding protein 3	3.283	2.569	2.528	2.79333	0.424559	0.0181746
P43613	ER-localized J domain-containing protein 5	2.894	1.628	1.938	2.15333	0.659898	0.0939922
P43636	Alpha-1,3/1,6-mannosyltransferase ALG2	0.689	0.574	0.498	0.587	0.0961613	0.0175954
P45978	Protein SCD6	0.438	0.34	0.443	0.407	0.0580775	0.00318206
P46654	40S ribosomal protein S0-B	0.929	0.905	0.689	0.841	0.132182	0.172604
P46655	Glutamate--tRNA ligase, cytoplasmic	0.288	0.43	0.426	0.381333	0.0808538	0.00564516
P46672	GU4 nucleic-binding protein 1	0.265	0.172	0.327	0.254667	0.078015	0.00363214
P46956	Inorganic phosphate transporter PHO86	3.799	2.355	3.476	3.21	0.757859	0.0370348
P46971	Dolichyl-phosphate-mannose--protein mannosyltransferase 4	2.318	2.648	2.353	2.43967	0.181269	0.00524293
P46982	Alpha-1,2-mannosyltransferase MNN5	3.417	2.92	1.878	2.73833	0.785419	0.0618063
P46985	Probable alpha-1,6-mannosyltransferase MNN11	1.162	0.755	0.856	0.924333	0.21193	0.599352
P46989	Autophagy-related protein 27	0.727	0.599	0.785	0.703667	0.09517	0.0327037
P46990	60S ribosomal protein L17-B	3.977	4.076	3.687	3.91333	0.202164	0.00160126
P47075	Vacuolar transporter chaperone 4	1.367	1.273	1.088	1.24267	0.141952	0.0976419
P47079	T-complex protein 1 subunit theta	0.347	0.441	0.311	0.366333	0.0671218	0.00371925
P47120	Deoxyhypusine hydroxylase	2.167	1.74	1.117	1.67467	0.52804	0.157364
P47133	ER membrane protein complex subunit 2	1.525	1.94	2.054	1.83967	0.278407	0.0347471
P47154	CAAX prenyl protease 1	0.893	1.158	1.516	1.189	0.312655	0.404971
P47160	Epsin-3	0.829	1.103	1.224	1.052	0.202378	0.699821
P48164	40S ribosomal protein S7-B	0.197	0.18	0.141	0.172667	0.0287112	0.000401198
P48231	Tricalbin-2	1.615	1.39	2.153	1.71933	0.392054	0.0863804
P48236	Uncharacterized membrane protein YGR149W	1.221	1.562	1.653	1.47867	0.227737	0.067863
P48570	Homocitrate synthase, cytosolic isozyme	1.191	1.09	1.163	1.148	0.052144	0.0389745
P48589	40S ribosomal protein S12	0.461	0.8	0.548	0.603	0.176065	0.0597458
P49167	60S ribosomal protein L38	0.868	0.813	0.623	0.768	0.12855	0.0889038
P49626	60S ribosomal protein L4-B	0.191	0.191	0.268	0.216667	0.044456	0.00107188
P50109	Protein PSP2	0.571	0.522	0.327	0.473333	0.129075	0.0194393
P51401	60S ribosomal protein L9-B	1.216	1.109	1.021	1.11533	0.0976542	0.177435
P51996	GTP-binding protein YPT32/YPT11	2.988	3.247	2.163	2.79933	0.566092	0.0314456
P52871	Protein transport protein SBH2	1.035	1.22	1.149	1.13467	0.0933292	0.129678
P53012	FIT family protein SCS3	2.041	2.194	1.675	1.97	0.266685	0.0242821
P53040	Transcription initiation factor TFIID subunit 6	1.765	1.485	2.177	1.809	0.348092	0.0565299
P53073	ER membrane protein complex subunit 4	1.878	1.471	1.379	1.576	0.265554	0.0641117
P53075	Sensitivity to high expression protein 10	0.842	1.17	1.524	1.17867	0.341083	0.460022
P53108	Protein YIP5	1.316	1.393	1.133	1.28067	0.133553	0.0678801
P53154	Glycerol uptake protein 1	1.299	2.077	2.551	1.97567	0.632121	0.116061
P53155	Uncharacterized protein YGL082W	1.052	0.748	0.534	0.778	0.2603	0.277661
P53192	Golgi to ER traffic protein 1	1.564	1.452	0.982	1.33267	0.308806	0.203045
P53199	Sterol-4-alpha-carboxylate 3-dehydrogenase, decarboxylating	3.595	3.171	3.245	3.337	0.226477	0.00311586
P53221	60S ribosomal protein L26-B	0.433	0.458	0.695	0.528667	0.14459	0.0299661
P53235	Eukaryotic translation initiation factor 2A	0.659	0.46	0.659	0.592667	0.114893	0.025509
P53252	Sphingolipid long chain base-responsive protein PIL1	0.369	0.31	0.298	0.325667	0.0380044	0.00105708
P53278	Uncharacterized protein YGR130C	0.617	0.892	0.553	0.687333	0.180112	0.0950961
P53297	PAB1-binding protein 1	0.561	0.852	0.52	0.644333	0.181009	0.0765538
P53299	Mitochondrial import inner membrane translocase subunit TIM13	0.451	0.392	0.289	0.377333	0.0819898	0.00572984
P53337	ER-derived vesicles protein ERV29	2.413	2.145	2.298	2.28533	0.134448	0.00362735
P53549	26S protease subunit RPT4	0.498	0.513	0.269	0.426667	0.136749	0.0184404
P53600	Coatomer subunit zeta	0.727	1.133	0.977	0.945667	0.204806	0.690987
P53633	Prenylated Rab acceptor 1	3.428	3.471	3.627	3.50867	0.104711	0.000580226
P53691	Peptidyl-prolyl cis-trans isomerase CPR6	0.323	0.313	0.214	0.283333	0.0602522	0.00234779
P53723	UPF0674 endoplasmic reticulum membrane protein YNR021W	2.806	2.007	2.56	2.45767	0.409212	0.0252781
P53860	Phosphatidylinositol transfer protein PDR16	0.403	0.506	0.543	0.484	0.0725465	0.00652448
P53898	Protein NSG2	1.136	1.277	1.869	1.42733	0.388937	0.197363
P54115	Magnesium-activated aldehyde dehydrogenase, cytosolic	0.693	0.73	0.758	0.727	0.0326037	0.00472066
P54783	D-arabinono-1,4-lactone oxidase	0.513	0.598	0.427	0.512667	0.0855005	0.0101051
P54837	Endoplasmic reticulum vesicle protein 25	2.697	2.938	3.16	2.93167	0.231565	0.00475612
P60010	Actin	0.685	0.883	0.73	0.766	0.103793	0.0597631
P61830	Histone H3	0.923	0.916	0.821	0.886667	0.0569766	0.0749044
P69771	Vacuolar protein-sorting-associated protein 46	2.354	1.885	1.874	2.03767	0.274008	0.0224627
P80210	Adenylosuccinate synthetase	0.328	0.574	0.41	0.437333	0.125257	0.0161205
P87262	60S ribosomal protein L34-A	0.786	0.724	0.794	0.768	0.0383145	0.00896923
Q00055	Glycerol-3-phosphate dehydrogenase [NAD(+)] 1	0.723	1	0.987	0.903333	0.156308	0.396218
Q00402	Nuclear migration protein NUM1	0.596	0.685	0.888	0.723	0.149663	0.0850742
Q00684	Tyrosine-protein phosphatase CDC14	0.425	0.526	0.669	0.54	0.122601	0.0228692
Q00955	Acetyl-CoA carboxylase	0.777	0.723	0.59	0.696667	0.096241	0.0319554
Q01560	Nucleolar protein 3	2.813	3.735	2.234	2.92733	0.757004	0.0477688
Q01590	Integral membrane protein SED5	1.225	1.974	1.251	1.48333	0.425129	0.187762
Q01855	40S ribosomal protein S15	0.254	0.36	0.177	0.263667	0.0918822	0.00515024
Q01939	26S protease regulatory subunit 8 homolog	0.38	0.664	0.404	0.482667	0.157497	0.0295329
Q02159	Ubiquitin-conjugating enzyme E2 7	0.434	0.592	0.776	0.600667	0.171165	0.0561333
Q02326	60S ribosomal protein L6-A	0.623	0.685	0.665	0.657667	0.0316439	0.00283601
Q02457	Protein TBF1	1.306	2.184	1.483	1.65767	0.46433	0.133644
Q02486	ARS-binding factor 2, mitochondrial	0.917	0.976	1.133	1.00867	0.111644	0.905352
Q02795	Dolichyl-diphosphooligosaccharide--protein glycosyltransferase subunit SWP1	2.343	2.678	1.64	2.22033	0.529761	0.057457
Q02884	Elongator complex protein 4	0.398	0.272	0.316	0.328667	0.0639479	0.00301086
Q02892	Nucleolar GTP-binding protein 1	1.449	1.787	1.099	1.445	0.344017	0.154371
Q03103	Endoplasmic oxidoreductin-1	4.832	5.81	6.066	5.56933	0.651252	0.00670328
Q03104	Meiotic sister chromatid recombination protein 1	12.311	14.569	11.11	12.6633	1.75621	0.00747303
Q03362	Uncharacterized protein YDR476C	3.988	6.791	5.599	5.45933	1.40671	0.031606
Q03390	Vacuolar protein-sorting-associated protein 60	3.114	2.883	2.469	2.822	0.326798	0.0105541
Q03529	Ceramide very long chain fatty acid hydroxylase SCS7	2.787	3.874	2.252	2.971	0.826507	0.0539169
Q03532	ATP-dependent RNA helicase HAS1	0.576	0.436	0.923	0.645	0.250725	0.133718
Q03559	Uncharacterized protein YMR295C	1.14	1.428	1.02	1.196	0.209685	0.246867
Q03640	Tricalbin-3	3.383	3.871	2.939	3.39767	0.466173	0.0123675
Q03648	Uncharacterized protein YMR209C	2.883	1.837	2.474	2.398	0.527125	0.0442675
Q03690	Clustered mitochondria protein 1	0.989	0.67	0.9	0.853	0.164612	0.261983
Q03940	RuvB-like protein 1	0.532	0.424	0.728	0.561333	0.154108	0.0387634
Q04279	Uncharacterized protein YMR086W	1.096	0.872	1.321	1.09633	0.2245	0.534792
Q04458	Fatty aldehyde dehydrogenase HFD1	0.149	0.206	0.304	0.219667	0.0783986	0.00334772
Q04697	Glucose-signaling factor 2	4.719	3.112	5.023	4.28467	1.02687	0.031068
Q04767	Golgi apparatus membrane protein TVP18	1.794	1.482	1.883	1.71967	0.210581	0.0273736
Q04869	Uncharacterized protein YMR315W	1.827	1.715	1.118	1.55333	0.381146	0.128394
Q04947	Reticulon-like protein 1	11.485	11.992	11.816	11.7643	0.257419	0.000190572
Q04958	Lysophospholipase NTE1	0.743	0.893	0.644	0.76	0.125367	0.0801694
Q04969	Signal peptidase complex subunit SPC2	2.222	2.332	2.768	2.44067	0.288765	0.0131287
Q05022	rRNA biogenesis protein RRP5	0.398	0.567	0.728	0.564333	0.165016	0.0446435
Q05050	Eisosome protein 1	0.881	0.695	0.808	0.794667	0.0937141	0.0629485
Q05359	Protein ERP1	1.694	1.705	1.978	1.79233	0.160886	0.0134666
Q05518	Protein PAL1	1.282	1.099	1.223	1.20133	0.0934041	0.0648429
Q05567	Sphingosine-1-phosphate lyase	1.557	1.19	0.953	1.23333	0.304323	0.315458
Q05775	Eukaryotic translation initiation factor 3 subunit J	0.658	0.959	0.809	0.808667	0.1505	0.158587
Q05812	Meiotic sister-chromatid recombination protein 3	1.424	2.143	1.876	1.81433	0.363445	0.0604404
Q06169	Peroxisomal membrane protein PEX30	5.091	6.122	5.988	5.73367	0.560584	0.00464229
Q06177	Translation machinery-associated protein 10	0.136	0.18	0.2	0.172	0.0327414	0.000520803
Q06179	Protein FMP27, mitochondrial	11.38	8.398	7.57	9.116	2.00391	0.0197222
Q06505	Transcription factor SPN1	0.398	0.386	0.505	0.429667	0.0655159	0.00436979
Q06833	Uncharacterized PH domain-containing protein YPR091C	3.192	3.039	3.877	3.36933	0.446258	0.0116192
Q07451	Endoplasmic reticulum transmembrane protein 3	2.855	3.008	2.363	2.742	0.337021	0.0122478
Q07478	ATP-dependent RNA helicase SUB2	0.624	0.627	0.832	0.694333	0.119232	0.04716
Q07541	Uncharacterized protein YDL121C	2.7	3.05	3.496	3.082	0.398964	0.0120198
Q07657	Seventh homolog of septin 1	3.446	3.732	3.055	3.411	0.339854	0.00655815
Q07825	Putative Xaa-Pro aminopeptidase FRA1	0.485	0.629	0.361	0.491667	0.134124	0.0224281
Q08245	Protein ZEO1	3.036	2.978	3.621	3.21167	0.355677	0.00851098
Q08492	Bud site selection protein 21	0.112	0.141	0.089	0.114	0.0260576	0.0002882
Q08548	Lysophospholipid acyltransferase	0.728	0.683	0.577	0.662667	0.0775263	0.0171542
Q08745	40S ribosomal protein S10-A	1.224	1.32	1.023	1.189	0.151562	0.163381
Q08972	[NU+] prion formation protein 1	0.739	1.586	0.979	1.10133	0.43655	0.726545
Q12032	Altered inheritance of mitochondria protein 41, mitochondrial	0.244	0.376	0.234	0.284667	0.0792549	0.00406685
Q12133	Signal peptidase complex subunit SPC3	2.289	2.263	1.694	2.082	0.336269	0.0307199
Q12154	ATPase GET3	1.397	1.3	0.891	1.196	0.268554	0.333567
Q12159	RNA annealing protein YRA1	0.148	0.22	0.19	0.186	0.0361663	0.000657369
Q12164	Pore membrane protein of 33 kDa	3.568	4.233	3.553	3.78467	0.38834	0.00642036
Q12207	Non-classical export protein 2	2.147	2.246	1.568	1.987	0.366225	0.042957
Q12213	60S ribosomal protein L7-B	0.222	0.231	0.419	0.290667	0.111231	0.0080971
Q12230	Sphingolipid long chain base-responsive protein LSP1	0.428	0.284	0.264	0.325333	0.0894725	0.0058114
Q12250	26S proteasome regulatory subunit RPN5	0.439	0.465	0.492	0.465333	0.0265016	0.000817942
Q12284	FAD-linked sulfhydryl oxidase ERV2	2.279	2.003	2.199	2.16033	0.142005	0.00495543
Q12305	Thiosulfate sulfurtransferase RDL1, mitochondrial	5.873	4.807	4.423	5.03433	0.751256	0.0113621
Q12335	Protoplast secreted protein 2	0.136	0.125	0.093	0.118	0.0223383	0.000213748
Q12402	Protein YOP1	17.907	22.876	15.367	18.7167	3.81942	0.0151411
Q12443	Reticulon-like protein 2	11.534	13.599	10.373	11.8353	1.63397	0.00749515
Q12449	Hsp90 co-chaperone AHA1	1.836	1.792	1.329	1.65233	0.280878	0.0566021
Q12451	Oxysterol-binding protein homolog 2	0.409	0.225	0.376	0.336667	0.0981037	0.0072122
Q12452	3-keto-steroid reductase	1.571	1.724	1.45	1.58167	0.137311	0.0180735
Q12460	Nucleolar protein 56	1.514	1.434	1.546	1.498	0.0576888	0.00444326
Q12464	RuvB-like protein 2	0.342	0.369	0.513	0.408	0.0919293	0.00794228
Q12466	Tricalbin-1	1.421	1.542	1.752	1.57167	0.167482	0.0274388
Q12499	Nucleolar protein 58	1.034	1.415	1.22	1.223	0.190518	0.179831
Q12680	Glutamate synthase [NADH]	0.481	0.332	0.281	0.364667	0.103925	0.00880135
Q12690	60S ribosomal protein L13-A	0.135	0.181	0.224	0.18	0.0445084	0.00098061
Q12746	Plasma membrane-associated coenzyme Q6 reductase PGA3	3.393	3.429	3.442	3.42133	0.0253837	3.66316e-05
Q3E754	40S ribosomal protein S21-B	0.366	0.281	0.472	0.373	0.0956922	0.00767493
Q3E757	60S ribosomal protein L11-B	0.186	0.113	0.207	0.168667	0.049339	0.00117205
Q3E792	40S ribosomal protein S25-A	1.339	1.099	0.92	1.11933	0.210239	0.429199
Q3E7X9	40S ribosomal protein S28-A	0.621	0.511	0.469	0.533667	0.0784942	0.00931238
Q3E7Y3	40S ribosomal protein S22-B	0.757	0.784	0.78	0.773667	0.0145717	0.0013788
Q6Q547	H/ACA ribonucleoprotein complex subunit 3	0.11	0.178	0.138	0.142	0.034176	0.000528448
Q92331	Vacuolar protein sorting-associated protein 5	8.164	12.733	9.603	10.1667	2.33607	0.02097
Q99190	Very-long-chain enoyl-CoA reductase	1.333	2.247	2.276	1.952	0.536266	0.0914875
Q99260	GTP-binding protein YPT6	1.565	1.195	1.632	1.464	0.235357	0.0761016
Q99287	Protein SEY1	2.356	2.652	2.516	2.508	0.148162	0.00320229
Q99383	Nuclear polyadenylated RNA-binding protein 4	1.302	0.779	1.543	1.208	0.390578	0.453699
