# Supplementary material for: Quantitative proteomics reveal proteins enriched in tubular endoplasmic reticulum of Saccharomyces cerevisiae
Source: eLife. 2017 Mar 13;6:e23816. doi: 10.7554/eLife.23816 (PMC5358975; doi:10.7554/eLife.23816)
Supplement: Figure 3—source data 3. — DOI: http://dx.doi.org/10.7554/eLife.23816.009 [file elife-23816-fig3-data3.xlsx]

## Sheet: Sheet1
Table S3. GO classfication of putative tubular ER proteins
* For biological process or Cellular location that has been manually curated, a related reference is provided.
Uniprot accession	TU:TO ratio	TU:BL ratio	Protein name	Protein description		Biological process	Cellular localization	Notes*
Q12402	35.573	18.717	YOP1	Protein YOP1		organelle organization	endoplasmic reticulum
Q03104	5.106	12.663	MSC1	Meiotic sister chromatid recombination protein 1		DNA recombination	endoplasmic reticulum
Q12443	5.14	11.835	RTN2	Reticulon-like protein 2		organelle organization	endoplasmic reticulum
Q04947	4.096	11.764	RTN1	Reticulon-like protein 1		organelle organization	endoplasmic reticulum
P16451	2.235	7.658	ODPX	Pyruvate dehydrogenase complex protein X component, mitochondrial		cofactor metabolism	mitochondrion
P09734	8.98	6.816	TBA3	Tubulin alpha-3 chain		cytoskeleton organization	cytoplasm
P38230	3.226	6.689	QOR	Probable quinone oxidoreductase		stress response	cytoplasm/nucleus
Q06169	4.515	5.734	PEX30	Peroxisomal membrane protein PEX30		organelle organization	endoplasmic reticulum/peroxisome	Joshi AS, et al. (2016) A family of membrane-shaping proteins at ER subdomains regulates pre-peroxisomal vesicle biogenesis. J Cell Biol 215(4):515-529.
Q03103	3.516	5.569	ERO1	Endoplasmic oxidoreductin-1		protein folding/degradation	endoplasmic reticulum
P40159	4.23	5.357	YNL208W	Uncharacterized protein YNL208W		unknown	mitochondrion
Q04697	2.558	4.285	GSF2	Glucose-signaling factor 2		signaling	endoplasmic reticulum	Sherwood PW & Carlson M (1999) Efficient export of the glucose transporter Hxt1p from the endoplasmic reticulum requires Gsf2p. P Natl Acad Sci USA 96(13):7415-7420.
P14020	4.064	4.272	DPM1	Dolichol-phosphate mannosyltransferase		protein folding	endoplasmic reticulum
P46990	2.746	3.913	RL17b	60S ribosomal protein L17-B		translation	cytoplasm
Q12164	3.809	3.785	POM33	Pore membrane protein of 33 kDa		organelle organization	endoplasmic reticulum	Chadrin A, et al. (2010) Pom33, a novel transmembrane nucleoporin required for proper nuclear pore complex distribution. J Cell Biol 189(5):795-811.
P07278	2.11	3.608	KAPR	cAMP-dependent protein kinase regulatory subunit		signaling	cytoplasm/nucleus
Q12746	2.491	3.421	PGA3	Plasma membrane-associated coenzyme Q6 reductase PGA3		energy metabolism	endoplasmic reticulum
Q07657	2.658	3.411	SHS1	Seventh homolog of septin 1		cytoskeleton organization	cytoplasm
Q03640	2.367	3.398	TCB3	Tricalbin-3		organelle organization/transport	endoplasmic reticulum	Toulmay A & Prinz WA (2012) A conserved membrane-binding domain targets proteins to organelle contact sites. J Cell Sci 125(1):49-58.
Q06833	4.074	3.369	NVJ2/YPR091C	Uncharacterized PH domain-containing protein YPR091C		organelle organization/transport	endoplasmic reticulum	Liu LK, et al. (2017) An inducible ER-Golgi tether facilitates ceramide transport to alleviate lipotoxicity. J Cell Biol 216(1):131-147
P53199	3.611	3.337	ERG26	Sterol-4-alpha-carboxylate 3-dehydrogenase, decarboxylating		lipid metabolism	endoplasmic reticulum
P38264	5.682	3.238	PHO88	Inorganic phosphate transport protein PHO88		transport	endoplasmic reticulum	Aviram N, et al. (2016) The SND proteins constitute an alternative targeting route to the endoplasmic reticulum. Nature 540(7631):134-+.
Q08245	4.369	3.212	ZEO1	Protein ZEO1		stress response	cell membrane
P46956	2.489	3.21	PHO86	Inorganic phosphate transporter PHO86		organelle organization/transport	endoplasmic reticulum
P40008	2.39	3.194	FMP52	Protein FMP52, mitochondrial		unknown	mitochondrion/endoplasmic reticulum	Reynolds SM, et al. (2008) Transmembrane Topology and Signal Peptide Prediction Using Dynamic Bayesian Networks. Plos Comput Biol 4(11).
P40075	4.014	3.191	SCS2	Vesicle-associated membrane protein-associated protein SCS2		organelle organization/transport	endoplasmic reticulum
Q07541	2.729	3.082	YDL121C	Uncharacterized protein YDL121C		unknown	endoplasmic reticulum
P54837	3.929	2.932	ERV25	Endoplasmic reticulum vesicle protein 25		organelle organization/transport	endoplasmic reticulum/vesicles	Belden WJ & Barlowe C (1996) Erv25p, a component of COPII-coated vesicles, forms a complex with Emp24p that is required for efficient endoplasmic reticulum to Golgi transport. J Biol Chem 271(43):26939-26946.
P39704	3.123	2.878	ERP2	Protein ERP2		organelle organization/transport	endoplasmic reticulum/vesicles	Marzioch M, et al. (1999) Erp1p and Erp2p, partners for Emp24p and Erv25p in a yeast p24 complex. Mol Biol Cell 10(6):1923-1938.
Q03390	6.547	2.822	VPS60	Vacuolar protein-sorting-associated protein 60		organelle organization/transport	vacuole membrane
P51996	2.486	2.799	YPT32	GTP-binding protein YPT32/YPT11		organelle organization/transport	cytoplasm
P43603	2.278	2.793	LSB3	LAS seventeen-binding protein 3		cytoskeleton organization	cytoplasm
Q07451	2.422	2.742	YET3	Endoplasmic reticulum transmembrane protein 3		organelle organization/transport	endoplasmic reticulum
P40970	3.596	2.736	LCB2	Serine palmitoyltransferase 2		lipid metabolism	endoplasmic reticulum
P28625	2.491	2.679	YIM1	Protein YIM1		stress response	endoplasmic reticulum
P35723	2.436	2.672	YET1	Endoplasmic reticulum transmembrane protein 1		organelle organization/transport	endoplasmic reticulum
P08456	2.764	2.642	PSS_	CDP-diacylglycerol--serine O-phosphatidyltransferase		lipid metabolism	mitochondrion
P29704	4.589	2.571	ERG9	Squalene synthase		lipid metabolism	endoplasmic reticulum
Q99287	3.601	2.508	SEY1	Protein SEY1		organelle organization	endoplasmic reticulum
P53723	2.583	2.458	YN8B	UPF0674 endoplasmic reticulum membrane protein YNR021W		unknown	endoplasmic reticulum
Q03648	2.352	2.398	YMR209C	Uncharacterized protein YMR209C		unknown	endoplasmic reticulum	In this paper
P15646	2.477	2.318	FBRL	rRNA 2'-O-methyltransferase fibrillarin		rRNA processing	nucleus
P17891	3.399	2.232	CLC1	Clathrin light chain		transport	cytoplasm
P36148	2.204	2.204	GPT2	Glycerol-3-phosphate O-acyltransferase 2		lipid metabolism	endoplasmic reticulum
P32913	5.795	2.203	VPS17	Vacuolar protein sorting-associated protein 17		transport	endomembrane system
P38177	2.502	2.191	YBL086C	Uncharacterized protein YBL086C		unknown	unknowm
P43555	2.578	2.19	EMP47	Protein EMP47		organelle organization/transport	endoplasmic reticulum/vacuole
P38427	2.185	2.107	TSL1	Trehalose synthase complex regulatory subunit TSL1		Carbohydrate metabolism	cytoplasm
P25574	3.191	2.066	EMC1	ER membrane protein complex subunit 1		lipid metabolism/protein folding	endoplasmic reticulum;
P43585	2.899	1.982	VTC2	Vacuolar transporter chaperone 2		organelle organization/transport	endoplasmic reticulum
P24783	3.043	1.98	DBP2	ATP-dependent RNA helicase DBP2		transcription	cytoplasm/nucleus
P25342	3.431	1.898	CDC10	Cell division control protein 10		cytoskeleton organization/protein complex biogenesis	cytoplasm
P47133	2.732	1.84	EMC2	ER membrane protein complex subunit 2		lipid metabolism/protein folding	endoplasmic reticulum
P38687	2.754	1.835	SRP68	Signal recognition particle subunit SRP68		translation	endoplasmic reticulum
Q05812	2.553	1.814	MSC3	Meiotic sister-chromatid recombination protein 3		DNA recombination	cell periphery/cytoplasm
P53040	3.095	1.809	TAF6	Transcription initiation factor TFIID subunit 6		transcription	nucleus
P18562	2.076	1.752	UPP	Uracil phosphoribosyltransferase		nucleotide metabolism	cytoplasm/nucleus
P32583	2.241	1.721	SRP40	Suppressor protein SRP40		transport	nucleus
Q04767	3.066	1.72	TVP18	Golgi apparatus membrane protein TVP18		organelle organization/transport	Golgi apparatus
P48231	3.302	1.719	TCB2	Tricalbin-2		organelle organization/transport	endoplasmic reticulum
P38778	4.774	1.698	SMF2	Manganese transporter SMF2		transport	mitochondrion/membrane;
P09733	3.408	1.695	TBA1	Tubulin alpha-1 chain		cytoskeleton organization	cytoplasm
P06787	2.531	1.671	CALM	Calmodulin		signaling	cytoplasm
Q12449	4.478	1.652	AHA1	Hsp90 co-chaperone AHA1		protein folding/degradation	cytoplasm
P15992	2.472	1.649	HSP26	Heat shock protein 26		protein folding/degradation	cytoplasm
P36017	2.466	1.642	VPS21	Vacuolar protein sorting-associated protein 21		organelle organization/transport	endosome/mitochondrion	Horazdovsky BF, et al. (1994) Vps21 Encodes a Rab5-Like Gtp-Binding Protein That Is Required for the Sorting of Yeast Vacuolar Proteins. Embo J 13(6):1297-1309.
P06105	2.489	1.637	SCP160	Protein SCP160		signaling/stress response	endoplasmic reticulum
P12385	2.282	1.618	ERF1	Eukaryotic peptide chain release factor subunit 1		translation	cytoplasm
P38428	2.24	1.615	CUE1	Coupling of ubiquitin conjugation to ER degradation protein 1		protein folding/degradation	endoplasmic reticulum
P39524	3.881	1.589	ATC3	Probable phospholipid-transporting ATPase DRS2		lipid metabolism	Golgi apparatus
Q12452	4.282	1.582	ERG27	3-keto-steroid reductase		lipid metabolism	endoplasmic reticulum/mitochondrion
P53073	2.335	1.576	EMC4	ER membrane protein complex subunit 4		lipid metabolism/protein folding	endoplasmic reticulum
P34730	2.461	1.575	BMH2	Protein BMH2 OS=Saccharomyces cerevisiae (strain ATCC 204508 / S288c) GN=BMH2 PE=1 SV=3		signaling	cytoplasm/nucleus
Q12466	2.494	1.572	TCB1	Tricalbin-1		organelle organization/transport	endoplasmic reticulum
P38167	4.861	1.532	ECM21	Protein ECM21		transport	cytoplasm
Q12460	3.095	1.498	NOP56	Nucleolar protein 56		rRNA processing	nucleus
P48236	2.308	1.479	YG3L	Uncharacterized membrane protein YGR149W		Unknown	membrane
Q99260	2.376	1.464	YPT6	GTP-binding protein YPT6		transport	Golgi apparatus
P39929	2.325	1.449	SNF7	Vacuolar-sorting protein SNF7		organelle organization/transport	cytoplasm/membrane
P32368	2.586	1.439	SAC1	Phosphoinositide phosphatase SAC1		organelle organization/transport	endoplasmic reticulum
