# Supplementary material for: Quantitative proteomics reveal proteins enriched in tubular endoplasmic reticulum of Saccharomyces cerevisiae
Source: eLife. 2017 Mar 13;6:e23816. doi: 10.7554/eLife.23816 (PMC5358975; doi:10.7554/eLife.23816)
Supplement: Figure 3—source data 4. — DOI: http://dx.doi.org/10.7554/eLife.23816.010 [file elife-23816-fig3-data4.xlsx]

## Sheet: Sheet1
Table S4. List of proteins with TU:TO>2 (p<0.05) but TU:BL not quantifiable (NQ).
Accession No.	Protein name	TU:TO ratio	p-value
P41807	V-type proton ATPase subunit H	3.86133	0.000277566
P08067	Cytochrome b-c1 complex subunit Rieske, mitochondrial	4.91133	0.000785757
P47031	Mitochondrial outer membrane protein IML2	9.06933	0.00179534
Q05123	Actin-like protein ARP9	2.306	0.00195559
P22202	Heat shock protein SSA4	2.256	0.00205845
P40087	DNA damage-inducible protein 1	22.9863	0.00253211
P49334	Mitochondrial import receptor subunit TOM22	2.46233	0.00268465
P15625	Phenylalanine--tRNA ligase alpha subunit	2.38933	0.00282944
P32191	Glycerol-3-phosphate dehydrogenase, mitochondrial	3.376	0.00333606
P25555	Single-strand telomeric DNA-binding protein GBP2	2.37967	0.0036404
P38999	Saccharopine dehydrogenase [NADP(+), L-glutamate-forming]	3.498	0.00428833
P30657	Proteasome subunit beta type-7	2.94933	0.00457912
P34216	EH domain-containing and endocytosis protein 1	2.256	0.00477331
Q02785	ATP-dependent permease PDR12	2.22067	0.00549836
P47008	Phosphatidylinositol transfer protein SFH5	2.339	0.00575444
P15732	Ubiquitin-conjugating enzyme E2-16 kDa	5.69067	0.00582026
P21243	Proteasome subunit alpha type-1	3.51267	0.00612356
P32458	Cell division control protein 11	2.76867	0.00626866
Q12697	Vacuolar cation-transporting ATPase YPK9	4.465	0.00656308
P07703	DNA-directed RNA polymerases I and III subunit RPAC1	2.18467	0.00680641
Q07878	Vacuolar protein sorting-associated protein 13	2.57	0.0069655
P53174	Pheromone-regulated membrane protein 8	2.643	0.00696901
Q12010	Uncharacterized membrane protein YOL092W	2.86133	0.00700296
Q12211	tRNA pseudouridine synthase 1	2.17533	0.00734366
P38011	Guanine nucleotide-binding protein subunit beta-like protein	3.37633	0.00743951
P04802	Aspartate--tRNA ligase, cytoplasmic	5.75567	0.00765241
P25619	30 kDa heat shock protein	3.44767	0.00790584
P31384	Glucose-repressible alcohol dehydrogenase transcriptional effector	6.61467	0.00791469
P37020	Anion/proton exchange transporter GEF1	4.599	0.00807262
P25568	Autophagy-related protein 22	6.62967	0.00906023
P39954	Adenosylhomocysteinase	2.374	0.00916611
P36010	Nucleoside diphosphate kinase	2.239	0.00953937
P42838	Alkylphosphocholine resistance protein LEM3	4.56233	0.00992715
Q12078	Iron transporter SMF3	2.51	0.0104821
P40335	Carboxypeptidase Y-deficient protein 8	3.664	0.010584
P07806	Valine--tRNA ligase, mitochondrial	5.392	0.0106288
P35845	Oxysterol-binding protein homolog 1	2.36267	0.0110246
P28777	Chorismate synthase	6.27267	0.0113607
Q08723	26S proteasome regulatory subunit RPN8	4.629	0.0115915
P32802	Transmembrane 9 superfamily member 1	2.167	0.0126603
Q04080	GPI transamidase component GPI17	2.55467	0.0126629
Q12114	Chitin biosynthesis protein CHS5	3.73667	0.0128727
P39111	V-type proton ATPase subunit F	11.5597	0.0129733
Q08224	Hydroxymethylpyrimidine/phosphomethylpyrimidine kinase THI20	3.76667	0.0130515
P32897	Mitochondrial import inner membrane translocase subunit TIM23	6.675	0.0134381
P00546	Cyclin-dependent kinase 1	3.946	0.0134882
Q12329	Heat shock protein 42	2.52067	0.0135971
P38811	Transcription-associated protein 1	5.19933	0.0140666
P53115	Putative DNA helicase INO80	3.39	0.016453
P07213	Mitochondrial import receptor subunit TOM70	2.977	0.0172775
P38129	Transcription initiation factor TFIID subunit 5	6.87733	0.017787
P38630	Replication factor C subunit 1	3.44967	0.0180827
P48606	Tubulin-specific chaperone A	2.42033	0.0183553
P38715	NADPH-dependent aldose reductase GRE3	2.44267	0.0187314
P32445	Single-stranded DNA-binding protein RIM1, mitochondrial	2.121	0.0231719
P38689	Ribose-phosphate pyrophosphokinase 3	2.159	0.0235545
P43558	Ubiquitin thioesterase OTU1	2.457	0.0255833
P40528	Protein SYG1	2.70733	0.0280937
P32590	Heat shock protein homolog SSE2	2.94367	0.031211
Q12406	Actin-related protein 7	3.42	0.035211
P36015	Synaptobrevin homolog YKT6	4.21767	0.0361008
P11938	DNA-binding protein RAP1	4.07767	0.0362554
P15454	Guanylate kinase	3.39867	0.0372904
Q05948	Uncharacterized SVF1-like protein YLR225C	2.384	0.0409634
Q3E846	Cytochrome c oxidase assembly factor 6	3.946	0.0476601
P22696	Peptidyl-prolyl cis-trans isomerase ESS1	2.119	0.0493535
